# Supplementary material for: Bilateral regulation of EGFR activity and local PI(4,5)P2 dynamics in mammalian cells observed with superresolution microscopy
Source: eLife journal article supplement (doi:10.7554/elife.101652), 2024-10-09
Supplement: fig1-data2 [file elife-101652-fig1-data2-v1.zip]

## Sheet: EGFR_before
	cell#1	cell#2	cell#3	cell#4	cell#5	cell#6	cell#7	cell#8
cell area	446.048	750.123	855.495	627.92	526.385	843.086	809.518	900.87
cluster areas	0.2487	0.2497	0.2487	0.2449	0.2397	0.2475	0.249	0.2419
	0.2412	0.2449	0.2453	0.2265	0.2296	0.2451	0.2405	0.2402
	0.2405	0.2426	0.2405	0.2185	0.225	0.244	0.2402	0.238
	0.2401	0.2387	0.2386	0.2123	0.2218	0.2388	0.2391	0.2309
	0.2309	0.23	0.2361	0.2013	0.2192	0.2323	0.2376	0.2297
	0.2124	0.2218	0.235	0.193	0.2181	0.2221	0.2366	0.2174
	0.2111	0.2205	0.2266	0.1865	0.2109	0.2216	0.2337	0.2173
	0.2044	0.215	0.2233	0.1842	0.1953	0.2212	0.2323	0.2161
	0.1997	0.2117	0.2226	0.1815	0.1897	0.2206	0.2225	0.2146
	0.1964	0.2075	0.2062	0.1737	0.1755	0.2204	0.2213	0.2113
	0.1948	0.2041	0.2027	0.1732	0.1671	0.2197	0.2139	0.2017
	0.1946	0.1989	0.1993	0.1567	0.164	0.2166	0.2109	0.2012
	0.1908	0.1981	0.1978	0.1412	0.1626	0.2166	0.2081	0.2002
	0.1871	0.1957	0.1959	0.125	0.1604	0.2163	0.2065	0.1889
	0.186	0.1909	0.1902	0.1246	0.1547	0.2142	0.2033	0.1859
	0.1832	0.1865	0.19	0.1225	0.1541	0.2124	0.2011	0.1815
	0.1793	0.1862	0.1847	0.1148	0.1486	0.211	0.2004	0.1777
	0.175	0.1826	0.1766	0.1089	0.1482	0.2062	0.2003	0.174
	0.1687	0.1751	0.1736	0.1084	0.1393	0.2059	0.1958	0.1692
	0.1575	0.1723	0.1733	0.1063	0.1392	0.2003	0.1906	0.1669
	0.1566	0.1708	0.1684	0.1005	0.1363	0.1975	0.1867	0.1623
	0.1529	0.1687	0.1683	0.0967	0.1297	0.1972	0.1845	0.1606
	0.1481	0.1681	0.166	0.084	0.1296	0.1959	0.176	0.1597
	0.1475	0.1676	0.1651	0.0817	0.1267	0.1945	0.1744	0.1588
	0.1431	0.1664	0.1592	0.0786	0.1254	0.1912	0.1738	0.1587
	0.143	0.1649	0.1577	0.0786	0.1232	0.1889	0.1728	0.1576
	0.1399	0.1556	0.1572	0.0708	0.114	0.1868	0.1692	0.1497
	0.1345	0.1485	0.1557	0.0703	0.1118	0.1868	0.1662	0.1476
	0.1345	0.1475	0.1544	0.0608	0.109	0.1831	0.165	0.1454
	0.132	0.1406	0.1534	0.0604	0.1076	0.18	0.1619	0.1443
	0.1301	0.1391	0.1508	0.0557	0.1075	0.1794	0.1611	0.1429
	0.1267	0.1376	0.1501	0.0527	0.105	0.1761	0.1566	0.1413
	0.1205	0.1305	0.1468	0.0526	0.0997	0.1756	0.1562	0.141
	0.1176	0.1304	0.1428	0.0504	0.0978	0.1747	0.1528	0.1294
	0.117	0.1303	0.1406	0.05	0.0961	0.1721	0.1462	0.1293
	0.1088	0.1285	0.1375	0.0481	0.0927	0.1703	0.1444	0.126
	0.1037	0.1285	0.1317	0.0455	0.0905	0.1682	0.1431	0.1247
	0.0974	0.1266	0.1263	0.0444	0.087	0.1666	0.1405	0.124
	0.0858	0.1246	0.1261	0.0429	0.0842	0.1626	0.1395	0.1213
	0.0855	0.1119	0.1249	0.0427	0.0833	0.1618	0.1388	0.1204
	0.0837	0.1088	0.1247	0.042	0.0826	0.1599	0.1364	0.1146
	0.0786	0.1086	0.1184	0.042	0.0809	0.1577	0.1355	0.1144
	0.064	0.1074	0.1182	0.0419	0.0806	0.1518	0.13	0.1134
	0.0639	0.1063	0.1175	0.0414	0.0799	0.1516	0.1299	0.1123
	0.0623	0.1035	0.1143	0.041	0.0791	0.1514	0.1256	0.1122
	0.0618	0.1031	0.1134	0.0397	0.0777	0.1505	0.1239	0.1096
	0.0605	0.1022	0.1133	0.0375	0.0764	0.1493	0.1233	0.1027
	0.0593	0.1016	0.11	0.037	0.0761	0.1467	0.1232	0.1001
	0.0584	0.1007	0.1098	0.0369	0.0759	0.1462	0.1225	0.0948
	0.0557	0.1	0.103	0.0365	0.0737	0.1452	0.1219	0.092
	0.0544	0.0999	0.1025	0.0364	0.0736	0.1445	0.1218	0.0914
	0.0529	0.0973	0.1012	0.0346	0.072	0.1434	0.1182	0.0888
	0.0522	0.0955	0.0989	0.0345	0.0691	0.1428	0.1161	0.0864
	0.0507	0.0932	0.098	0.0343	0.0681	0.1416	0.116	0.0862
	0.0497	0.0929	0.0971	0.0337	0.0676	0.1397	0.113	0.086
	0.0495	0.0915	0.095	0.0326	0.0655	0.137	0.109	0.0815
	0.0492	0.0847	0.0944	0.032	0.0653	0.1344	0.1071	0.0812
	0.0483	0.0845	0.092	0.0313	0.0649	0.1343	0.1056	0.0793
	0.0467	0.0844	0.0917	0.031	0.0648	0.1307	0.1055	0.0768
	0.0455	0.0843	0.0912	0.0309	0.0623	0.1287	0.0998	0.076
	0.0434	0.0837	0.0911	0.0304	0.0617	0.1285	0.0993	0.0742
	0.0429	0.0819	0.0885	0.0302	0.0612	0.1281	0.0992	0.0741
	0.0424	0.0813	0.0845	0.0302	0.0587	0.1274	0.093	0.0737
	0.042	0.0805	0.0843	0.03	0.0571	0.124	0.0923	0.0735
	0.0418	0.079	0.0834	0.0292	0.0563	0.1221	0.0916	0.0728
	0.0418	0.0778	0.0814	0.0287	0.0561	0.1184	0.0892	0.0727
	0.0409	0.0735	0.0799	0.0283	0.055	0.1164	0.0871	0.0722
	0.0407	0.0716	0.075	0.0268	0.0537	0.1152	0.0861	0.0722
	0.0403	0.0715	0.0739	0.0265	0.0497	0.1127	0.0847	0.072
	0.0384	0.0686	0.0738	0.026	0.0474	0.112	0.0841	0.0712
	0.0381	0.068	0.0725	0.026	0.0471	0.1111	0.0807	0.0699
	0.0351	0.0668	0.0707	0.026	0.0469	0.1086	0.0804	0.0688
	0.035	0.0653	0.0686	0.026	0.0459	0.1068	0.08	0.0688
	0.035	0.0628	0.067	0.0258	0.0454	0.1046	0.0792	0.0681
	0.0346	0.0614	0.0663	0.0257	0.0448	0.1	0.0779	0.0679
	0.0342	0.0597	0.066	0.0253	0.0445	0.0998	0.0767	0.0664
	0.0332	0.0595	0.0655	0.0252	0.0445	0.0979	0.0763	0.0658
	0.033	0.0569	0.0639	0.0248	0.0444	0.0962	0.0753	0.0647
	0.0317	0.0562	0.0625	0.0246	0.0443	0.0929	0.0753	0.0643
	0.0312	0.056	0.0621	0.024	0.0432	0.0923	0.0746	0.0634
	0.0303	0.0557	0.0613	0.0239	0.0425	0.0898	0.0717	0.0612
	0.03	0.0532	0.0611	0.0239	0.0425	0.0897	0.0712	0.0608
	0.0296	0.0519	0.0609	0.0238	0.0423	0.089	0.0707	0.0605
	0.0293	0.0508	0.0606	0.0237	0.0422	0.0886	0.0706	0.0597
	0.0288	0.0496	0.0602	0.0237	0.0422	0.0859	0.0703	0.0589
	0.0285	0.0494	0.0601	0.0232	0.0414	0.0835	0.067	0.0588
	0.0272	0.0485	0.0599	0.0231	0.0408	0.0818	0.0663	0.0586
	0.0267	0.0469	0.0599	0.0231	0.0405	0.0793	0.0661	0.0584
	0.0267	0.0467	0.0597	0.0228	0.0403	0.0791	0.0652	0.058
	0.0266	0.0463	0.058	0.0226	0.0401	0.079	0.065	0.0566
	0.0257	0.0462	0.0576	0.0226	0.0397	0.0784	0.0602	0.0553
	0.0256	0.0458	0.0574	0.0225	0.0397	0.0762	0.0599	0.0552
	0.0255	0.0456	0.0571	0.0221	0.0386	0.0756	0.0591	0.0529
	0.0253	0.043	0.0566	0.0219	0.0385	0.0727	0.0589	0.0512
	0.0249	0.0428	0.0563	0.0217	0.0374	0.072	0.0585	0.0511
	0.0248	0.0421	0.055	0.0215	0.0372	0.0707	0.0581	0.0509
	0.0243	0.0417	0.0547	0.021	0.0372	0.0703	0.0574	0.0507
	0.0239	0.0416	0.0543	0.0209	0.0372	0.0672	0.0573	0.0507
	0.0238	0.0414	0.0525	0.0208	0.0368	0.0671	0.0569	0.0507
	0.0238	0.0406	0.0505	0.0205	0.0367	0.0652	0.056	0.0503
	0.0233	0.0402	0.0502	0.0204	0.0367	0.0639	0.0555	0.0501
	0.0228	0.0394	0.0496	0.0202	0.0363	0.0636	0.0539	0.0496
	0.0223	0.0386	0.0487	0.0201	0.0358	0.0618	0.0535	0.0492
	0.0221	0.0386	0.0478	0.02	0.0353	0.0614	0.0533	0.0489
	0.022	0.0384	0.0477	0.02	0.0352	0.0608	0.0531	0.0482
	0.0217	0.0379	0.0477	0.0199	0.035	0.0608	0.0529	0.0479
	0.0216	0.0377	0.0466	0.0198	0.0341	0.0607	0.0524	0.0479
	0.0215	0.0374	0.0458	0.0198	0.0339	0.0595	0.0524	0.0472
	0.0214	0.0368	0.0455	0.0196	0.0336	0.0583	0.052	0.0471
	0.0212	0.0364	0.045	0.0196	0.0336	0.0573	0.0518	0.0463
	0.0212	0.0362	0.0442	0.0195	0.0336	0.0565	0.0515	0.0463
	0.0212	0.0358	0.0435	0.0194	0.0334	0.0557	0.0512	0.0452
	0.0211	0.0345	0.0433	0.0192	0.0334	0.0547	0.0504	0.0446
	0.021	0.0341	0.043	0.0192	0.0332	0.0543	0.0494	0.0443
	0.0208	0.0325	0.0429	0.0191	0.0326	0.0539	0.0489	0.044
	0.0203	0.0324	0.0427	0.0191	0.0324	0.0534	0.0483	0.0439
	0.0202	0.0314	0.0417	0.019	0.0323	0.0534	0.0482	0.0437
	0.02	0.0312	0.0417	0.0189	0.0322	0.0533	0.0479	0.0434
	0.0199	0.0311	0.0415	0.0184	0.0321	0.0525	0.0477	0.0432
	0.0198	0.0309	0.0412	0.0184	0.032	0.0525	0.0475	0.0432
	0.0197	0.0308	0.0408	0.0184	0.032	0.0525	0.0469	0.043
	0.0196	0.0306	0.0407	0.0183	0.0318	0.0516	0.0466	0.0424
	0.0192	0.0306	0.04	0.0182	0.0317	0.0507	0.0438	0.0423
	0.0191	0.0305	0.0398	0.018	0.0317	0.0505	0.0434	0.0416
	0.0189	0.0301	0.0394	0.0179	0.0316	0.0495	0.0432	0.0412
	0.0186	0.0296	0.0389	0.0179	0.0313	0.0488	0.043	0.0411
	0.0184	0.0289	0.0377	0.0178	0.0312	0.0484	0.0422	0.0405
	0.0181	0.0289	0.0374	0.0178	0.0306	0.048	0.0418	0.0402
	0.018	0.0287	0.0374	0.0177	0.0302	0.0479	0.0417	0.04
	0.018	0.0281	0.0368	0.0177	0.0298	0.0472	0.0414	0.0399
	0.0179	0.0279	0.0367	0.0176	0.0294	0.047	0.0409	0.0395
	0.0179	0.0277	0.0364	0.0175	0.0292	0.0467	0.0409	0.0392
	0.0178	0.0271	0.0363	0.0174	0.0288	0.0465	0.0405	0.0392
	0.0176	0.0271	0.0361	0.0173	0.0284	0.0463	0.04	0.039
	0.0174	0.027	0.036	0.017	0.0284	0.0458	0.039	0.0387
	0.0172	0.027	0.0359	0.017	0.0283	0.0456	0.0383	0.0385
	0.0171	0.0267	0.0355	0.0169	0.0282	0.0452	0.0376	0.0384
	0.017	0.0266	0.0354	0.0169	0.0281	0.0444	0.037	0.038
	0.0168	0.0263	0.0346	0.0168	0.0279	0.0439	0.0369	0.0379
	0.0165	0.0262	0.0346	0.0167	0.0278	0.0436	0.0368	0.0378
	0.0155	0.0262	0.0337	0.0166	0.0273	0.0435	0.0367	0.0377
	0.0151	0.0262	0.0337	0.0165	0.0271	0.0434	0.0363	0.0371
	0.0151	0.0257	0.0335	0.0165	0.0267	0.0426	0.0358	0.037
	0.0148	0.0253	0.0328	0.0164	0.0266	0.0425	0.0357	0.0367
	0.0146	0.0253	0.0324	0.0164	0.0266	0.0424	0.0354	0.0367
	0.0144	0.025	0.0323	0.0163	0.0265	0.0423	0.0354	0.0367
	0.0142	0.0249	0.0314	0.0163	0.0264	0.0413	0.0352	0.0365
	0.014	0.0248	0.0313	0.0163	0.0261	0.0412	0.0349	0.0364
	0.0138	0.0247	0.0312	0.0162	0.026	0.0407	0.0347	0.0358
	0.0137	0.0244	0.0304	0.0162	0.0256	0.04	0.0345	0.0357
	0.0136	0.0241	0.0294	0.016	0.0255	0.0397	0.0341	0.0356
	0.0134	0.0239	0.0292	0.016	0.0254	0.039	0.034	0.0354
	0.0132	0.0236	0.0288	0.0158	0.0253	0.038	0.0339	0.0354
	0.013	0.0236	0.0287	0.0158	0.0248	0.0375	0.0339	0.0352
	0.013	0.0236	0.0287	0.0157	0.0244	0.0367	0.0339	0.0349
	0.0129	0.0234	0.0283	0.0155	0.0243	0.0364	0.0337	0.0342
	0.0129	0.0232	0.0283	0.0154	0.0242	0.0363	0.0335	0.034
	0.0124	0.0231	0.0282	0.0154	0.024	0.0356	0.0333	0.0339
	0.0124	0.0229	0.0282	0.0151	0.0239	0.0355	0.0332	0.0337
	0.0123	0.0228	0.0281	0.015	0.0239	0.0354	0.0331	0.0336
	0.0123	0.0227	0.0281	0.0149	0.0238	0.0353	0.033	0.033
	0.0121	0.0225	0.0275	0.0149	0.0238	0.0352	0.0329	0.0326
	0.0121	0.0222	0.0275	0.0148	0.0237	0.0349	0.0328	0.0325
	0.012	0.022	0.0273	0.0147	0.0236	0.0348	0.0327	0.0325
	0.012	0.0219	0.027	0.0144	0.0235	0.0348	0.0327	0.0325
	0.0119	0.0217	0.027	0.0144	0.0233	0.0347	0.032	0.0324
	0.0118	0.0217	0.0265	0.0143	0.0231	0.0345	0.032	0.0323
	0.0118	0.0217	0.0262	0.0142	0.023	0.0344	0.0319	0.0316
	0.0117	0.0216	0.0261	0.0142	0.0229	0.0341	0.0319	0.0315
	0.0117	0.0212	0.0258	0.0141	0.0229	0.034	0.0318	0.0314
	0.0117	0.021	0.0258	0.0141	0.0226	0.0339	0.0314	0.031
	0.0117	0.0209	0.0252	0.0141	0.0225	0.0333	0.0314	0.0309
	0.0116	0.0208	0.0252	0.014	0.0223	0.0332	0.0313	0.0308
	0.0116	0.0207	0.0252	0.014	0.0223	0.033	0.0313	0.0307
	0.0115	0.0206	0.0252	0.014	0.0223	0.0328	0.0306	0.0306
	0.0115	0.0206	0.025	0.014	0.0223	0.0328	0.0305	0.0305
	0.0114	0.0206	0.0241	0.0139	0.0222	0.0327	0.03	0.0302
	0.0114	0.0199	0.024	0.0139	0.0221	0.0326	0.0298	0.0301
	0.0114	0.0198	0.024	0.0138	0.0221	0.032	0.0298	0.03
	0.0113	0.0193	0.0238	0.0138	0.022	0.0317	0.0293	0.03
	0.0113	0.0192	0.0234	0.0133	0.0218	0.0316	0.0291	0.0297
	0.0112	0.0191	0.0234	0.0131	0.0218	0.0314	0.029	0.0297
	0.0112	0.019	0.0232	0.0131	0.0216	0.0314	0.0288	0.0293
	0.0111	0.0189	0.0226	0.013	0.0213	0.0313	0.0286	0.0293
	0.011	0.0189	0.0226	0.0129	0.0213	0.0312	0.0286	0.0292
	0.011	0.0189	0.0222	0.0129	0.0212	0.0312	0.0285	0.0291
	0.011	0.0187	0.022	0.0129	0.0211	0.0308	0.0285	0.0291
	0.0108	0.0186	0.0218	0.0129	0.0207	0.0306	0.0285	0.029
	0.0107	0.0185	0.0216	0.0128	0.0206	0.0305	0.0284	0.0287
	0.0106	0.0185	0.0214	0.0128	0.0206	0.0304	0.0283	0.0287
	0.0106	0.0185	0.0212	0.0128	0.0203	0.0303	0.0283	0.0287
	0.0105	0.0184	0.0212	0.0127	0.0201	0.0301	0.0282	0.0285
	0.0105	0.0184	0.0208	0.0127	0.0201	0.0299	0.0282	0.0285
	0.0104	0.0183	0.0208	0.0127	0.0201	0.0298	0.0281	0.0283
	0.0103	0.0183	0.0207	0.0127	0.0201	0.0298	0.0277	0.0281
	0.0103	0.0181	0.0205	0.0125	0.0201	0.0294	0.0274	0.0279
	0.0103	0.0181	0.0204	0.0125	0.0199	0.0293	0.0274	0.0278
	0.0103	0.018	0.0203	0.0125	0.0197	0.0292	0.0273	0.0277
	0.0103	0.018	0.0203	0.0124	0.0197	0.0291	0.0271	0.0274
	0.0102	0.0179	0.0202	0.0122	0.0196	0.0287	0.027	0.0272
	0.0102	0.0178	0.02	0.0122	0.0195	0.0286	0.0268	0.027
	0.0102	0.0176	0.02	0.0121	0.0195	0.0284	0.0268	0.0269
	0.0102	0.0174	0.0199	0.0121	0.0194	0.0284	0.0267	0.0266
	0.0101	0.0167	0.0199	0.0121	0.0193	0.0282	0.0266	0.0264
	0.0101	0.0166	0.0197	0.012	0.0193	0.0281	0.0266	0.0263
	0.01	0.0166	0.0197	0.0119	0.0192	0.028	0.0266	0.026
	0.0099	0.0164	0.0195	0.0118	0.0191	0.028	0.0265	0.0259
	0.0099	0.0163	0.0194	0.0118	0.0191	0.0279	0.0264	0.0258
	0.0098	0.016	0.0193	0.0118	0.019	0.0274	0.0263	0.0254
	0.0098	0.016	0.019	0.0117	0.019	0.0274	0.0262	0.0253
	0.0097	0.0158	0.0185	0.0117	0.0187	0.0273	0.026	0.0251
	0.0096	0.0157	0.0183	0.0117	0.0185	0.0273	0.0257	0.0251
	0.0095	0.0157	0.0182	0.0116	0.0184	0.0272	0.0257	0.0251
	0.0094	0.0155	0.0181	0.0116	0.0183	0.0272	0.0257	0.025
	0.0093	0.0154	0.0181	0.0116	0.0182	0.0272	0.0255	0.0249
	0.0093	0.0153	0.018	0.0116	0.018	0.0271	0.0253	0.0248
	0.0093	0.015	0.0179	0.0115	0.0179	0.027	0.0248	0.0247
	0.0092	0.015	0.0178	0.0115	0.0178	0.0267	0.0248	0.0245
	0.0092	0.0149	0.0178	0.0115	0.0178	0.0266	0.0248	0.0245
	0.0092	0.0148	0.0177	0.0115	0.0178	0.0265	0.0247	0.0244
	0.0092	0.0148	0.0177	0.0115	0.0176	0.0264	0.0246	0.0242
	0.0091	0.0146	0.0176	0.0114	0.0176	0.0262	0.0246	0.0241
	0.0091	0.0146	0.0173	0.0114	0.0175	0.026	0.0245	0.024
	0.0091	0.0146	0.0171	0.0114	0.0174	0.026	0.0245	0.0238
	0.009	0.0146	0.0171	0.0113	0.0173	0.0258	0.0243	0.0238
	0.009	0.0146	0.017	0.0112	0.0173	0.0257	0.0243	0.0238
	0.0089	0.0145	0.017	0.0112	0.0173	0.0257	0.0241	0.0237
	0.0088	0.0145	0.0169	0.0111	0.0172	0.0255	0.0239	0.0237
	0.0088	0.0145	0.0167	0.0111	0.0171	0.0252	0.0238	0.0236
	0.0087	0.0144	0.0167	0.0111	0.0169	0.0252	0.0238	0.0236
	0.0087	0.0143	0.0166	0.0111	0.0168	0.0252	0.0237	0.0232
	0.0086	0.0142	0.0166	0.0111	0.0166	0.0251	0.0237	0.023
	0.0085	0.0141	0.0166	0.0111	0.0165	0.0249	0.0237	0.0229
	0.0085	0.014	0.0164	0.0111	0.0164	0.0248	0.0236	0.0228
	0.0084	0.014	0.0163	0.011	0.0163	0.0245	0.0236	0.0227
	0.0083	0.0139	0.0162	0.011	0.0163	0.0245	0.0235	0.0227
	0.0083	0.0138	0.0162	0.0109	0.0162	0.0242	0.0233	0.0227
	0.0083	0.0138	0.0161	0.0108	0.0162	0.024	0.0233	0.0225
	0.0083	0.0137	0.0161	0.0108	0.0162	0.0234	0.0232	0.0225
	0.0083	0.0136	0.0161	0.0106	0.016	0.0234	0.0232	0.0225
	0.0083	0.0135	0.016	0.0106	0.016	0.0234	0.0231	0.0224
	0.0082	0.0134	0.016	0.0106	0.0159	0.0233	0.0226	0.0224
	0.0082	0.0133	0.0156	0.0105	0.0158	0.0231	0.0225	0.0221
	0.0081	0.0132	0.0154	0.0104	0.0157	0.023	0.0224	0.0221
	0.0081	0.013	0.0153	0.0104	0.0153	0.0228	0.0224	0.0219
	0.0081	0.013	0.0152	0.0104	0.0153	0.0224	0.0224	0.0219
	0.008	0.0127	0.0151	0.0104	0.0153	0.0223	0.0223	0.0217
	0.008	0.0126	0.0149	0.0104	0.0153	0.022	0.0221	0.0217
	0.008	0.0126	0.0149	0.0103	0.0152	0.022	0.0221	0.0217
	0.0078	0.0125	0.0149	0.0103	0.0152	0.022	0.022	0.0216
	0.0078	0.0125	0.0149	0.0103	0.0152	0.0219	0.0219	0.0216
	0.0078	0.0125	0.0147	0.0103	0.0151	0.0216	0.0219	0.0216
	0.0077	0.0124	0.0147	0.0103	0.0151	0.0215	0.0219	0.0216
	0.0077	0.0124	0.0147	0.0101	0.015	0.0213	0.0217	0.0214
	0.0077	0.0124	0.0145	0.0101	0.015	0.0213	0.0215	0.0214
	0.0076	0.0123	0.0144	0.0101	0.0149	0.0212	0.0213	0.0214
	0.0075	0.0123	0.0144	0.0101	0.0148	0.0212	0.0213	0.0212
	0.0075	0.0123	0.0143	0.01	0.0147	0.0211	0.0212	0.0209
	0.0075	0.0122	0.0142	0.0099	0.0147	0.0211	0.0211	0.0209
	0.0075	0.0122	0.0141	0.0099	0.0147	0.0208	0.021	0.0208
	0.0075	0.0122	0.0141	0.0099	0.0146	0.0207	0.021	0.0208
	0.0075	0.0121	0.014	0.0099	0.0146	0.0206	0.0209	0.0207
	0.0074	0.0121	0.014	0.0099	0.0145	0.0203	0.0209	0.0207
	0.0074	0.0119	0.0139	0.0099	0.0145	0.0203	0.0209	0.0207
	0.0074	0.0119	0.0138	0.0098	0.0144	0.0202	0.0208	0.0206
	0.0074	0.0118	0.0138	0.0098	0.0144	0.02	0.0207	0.0206
	0.0072	0.0118	0.0137	0.0098	0.0143	0.0198	0.0206	0.0206
	0.0072	0.0117	0.0137	0.0098	0.0143	0.0198	0.0206	0.0206
	0.0071	0.0117	0.0137	0.0098	0.0143	0.0195	0.0204	0.0205
	0.0071	0.0116	0.0136	0.0098	0.0142	0.0195	0.0203	0.0204
	0.0071	0.0116	0.0136	0.0098	0.0141	0.0194	0.0202	0.0202
	0.0071	0.0115	0.0135	0.0098	0.0141	0.0194	0.0202	0.0201
	0.0071	0.0115	0.0135	0.0098	0.0141	0.019	0.0201	0.02
	0.007	0.0113	0.0134	0.0097	0.014	0.0188	0.0201	0.02
	0.007	0.0113	0.0133	0.0097	0.0139	0.0186	0.0198	0.0198
	0.007	0.0112	0.0133	0.0097	0.0139	0.0186	0.0198	0.0197
	0.007	0.0112	0.0133	0.0096	0.0139	0.0186	0.0196	0.0196
	0.007	0.0111	0.0133	0.0096	0.0138	0.0185	0.0195	0.0195
	0.007	0.0111	0.0132	0.0096	0.0138	0.0183	0.0195	0.0195
	0.0069	0.0111	0.0132	0.0095	0.0137	0.0182	0.0194	0.0195
	0.0069	0.011	0.0132	0.0095	0.0133	0.0182	0.0191	0.0194
	0.0068	0.0109	0.0131	0.0093	0.0133	0.0182	0.019	0.0194
	0.0068	0.0109	0.0131	0.0093	0.0132	0.0181	0.0188	0.0194
	0.0068	0.0108	0.013	0.0093	0.0132	0.018	0.0188	0.0192
	0.0068	0.0108	0.0128	0.0093	0.0131	0.0179	0.0186	0.0192
	0.0068	0.0107	0.0127	0.0093	0.0131	0.0179	0.0186	0.0192
	0.0068	0.0106	0.0124	0.0092	0.013	0.0179	0.0185	0.0189
	0.0068	0.0106	0.0124	0.0091	0.0129	0.0179	0.0185	0.0189
	0.0067	0.0105	0.0123	0.0091	0.0129	0.0178	0.0185	0.0189
	0.0067	0.0105	0.0122	0.0091	0.0129	0.0178	0.0185	0.0189
	0.0067	0.0105	0.0122	0.0091	0.0129	0.0177	0.0184	0.0189
	0.0067	0.0104	0.0121	0.0091	0.0129	0.0177	0.0184	0.0188
	0.0067	0.0104	0.0121	0.009	0.0128	0.0176	0.0184	0.0188
	0.0066	0.0104	0.012	0.009	0.0128	0.0176	0.0184	0.0187
	0.0066	0.0104	0.0119	0.0088	0.0128	0.0176	0.0183	0.0186
	0.0065	0.0103	0.0119	0.0088	0.0127	0.0175	0.0183	0.0183
	0.0065	0.0103	0.0119	0.0088	0.0126	0.0175	0.0183	0.0183
	0.0065	0.0103	0.0119	0.0088	0.0126	0.0174	0.0182	0.0183
	0.0065	0.0102	0.0118	0.0088	0.0125	0.0174	0.0182	0.0182
	0.0065	0.0102	0.0117	0.0087	0.0125	0.0174	0.0182	0.0182
	0.0065	0.0102	0.0116	0.0087	0.0124	0.0174	0.0182	0.0181
	0.0064	0.0102	0.0116	0.0087	0.0124	0.0173	0.0182	0.018
	0.0064	0.0101	0.0115	0.0086	0.0124	0.0171	0.0182	0.0179
	0.0064	0.01	0.0114	0.0086	0.0124	0.0168	0.0181	0.0179
	0.0064	0.0099	0.0113	0.0085	0.0123	0.0166	0.0181	0.0179
	0.0063	0.0099	0.0113	0.0085	0.0123	0.0165	0.018	0.0179
	0.0063	0.0098	0.0111	0.0085	0.0123	0.0164	0.018	0.0179
	0.0063	0.0097	0.0111	0.0085	0.0122	0.0163	0.0179	0.0179
	0.0063	0.0097	0.0111	0.0085	0.0122	0.0163	0.0178	0.0178
	0.0062	0.0096	0.0111	0.0085	0.0121	0.0162	0.0178	0.0177
	0.0062	0.0096	0.011	0.0084	0.0121	0.016	0.0177	0.0177
	0.0062	0.0096	0.011	0.0084	0.0121	0.016	0.0177	0.0176
	0.0062	0.0095	0.011	0.0084	0.0121	0.0159	0.0176	0.0175
	0.0062	0.0095	0.011	0.0084	0.0121	0.0159	0.0175	0.0174
	0.0061	0.0094	0.011	0.0083	0.012	0.0158	0.0174	0.0174
	0.0061	0.0093	0.011	0.0083	0.012	0.0158	0.0174	0.0172
	0.0061	0.0093	0.011	0.0082	0.012	0.0158	0.0173	0.0171
	0.0061	0.0092	0.0109	0.0082	0.012	0.0158	0.0173	0.0171
	0.006	0.0092	0.0109	0.0082	0.012	0.0158	0.0172	0.0171
	0.006	0.0092	0.0108	0.0082	0.0119	0.0157	0.0172	0.0171
	0.006	0.0092	0.0108	0.0082	0.0119	0.0156	0.017	0.017
	0.006	0.0091	0.0108	0.0081	0.0119	0.0155	0.017	0.0169
	0.006	0.0091	0.0108	0.008	0.0118	0.0155	0.0169	0.0169
	0.0059	0.009	0.0107	0.008	0.0118	0.0154	0.0169	0.0169
	0.0059	0.009	0.0107	0.008	0.0118	0.0151	0.0168	0.0168
	0.0059	0.009	0.0106	0.008	0.0117	0.0151	0.0168	0.0168
	0.0059	0.0089	0.0106	0.008	0.0117	0.015	0.0167	0.0168
	0.0059	0.0089	0.0105	0.0079	0.0117	0.0149	0.0167	0.0167
	0.0059	0.0089	0.0105	0.0079	0.0115	0.0148	0.0167	0.0167
	0.0059	0.0087	0.0104	0.0079	0.0115	0.0146	0.0166	0.0166
	0.0058	0.0087	0.0104	0.0079	0.0114	0.0146	0.0166	0.0165
	0.0058	0.0087	0.0104	0.0079	0.0114	0.0146	0.0166	0.0165
	0.0058	0.0086	0.0102	0.0078	0.0114	0.0146	0.0166	0.0164
	0.0058	0.0086	0.0102	0.0078	0.0113	0.0146	0.0166	0.0163
	0.0057	0.0085	0.0102	0.0078	0.0113	0.0144	0.0166	0.0163
	0.0056	0.0085	0.0102	0.0078	0.0112	0.0144	0.0165	0.0163
	0.0056	0.0084	0.0101	0.0077	0.0112	0.0144	0.0165	0.0163
	0.0056	0.0084	0.0101	0.0077	0.0111	0.0143	0.0165	0.0162
	0.0056	0.0083	0.01	0.0077	0.0111	0.0142	0.0164	0.0162
	0.0056	0.0083	0.01	0.0076	0.0111	0.0142	0.0163	0.0162
	0.0056	0.0083	0.01	0.0076	0.011	0.0142	0.0163	0.0161
	0.0056	0.0082	0.01	0.0076	0.011	0.0141	0.0162	0.016
	0.0055	0.0082	0.0099	0.0076	0.011	0.0141	0.0162	0.016
	0.0055	0.0082	0.0099	0.0075	0.011	0.014	0.0161	0.0159
	0.0055	0.0081	0.0099	0.0075	0.0109	0.014	0.016	0.0159
	0.0055	0.0081	0.0099	0.0075	0.0108	0.014	0.016	0.0158
	0.0055	0.008	0.0098	0.0074	0.0108	0.0139	0.0159	0.0158
	0.0055	0.008	0.0097	0.0074	0.0108	0.0139	0.0158	0.0158
	0.0055	0.0079	0.0097	0.0074	0.0107	0.0139	0.0158	0.0156
	0.0055	0.0079	0.0096	0.0074	0.0107	0.0139	0.0157	0.0156
	0.0054	0.0079	0.0096	0.0074	0.0107	0.0138	0.0157	0.0155
	0.0054	0.0078	0.0096	0.0074	0.0106	0.0138	0.0156	0.0155
	0.0053	0.0078	0.0096	0.0074	0.0106	0.0137	0.0156	0.0155
	0.0053	0.0078	0.0096	0.0074	0.0105	0.0137	0.0156	0.0154
	0.0053	0.0077	0.0095	0.0074	0.0105	0.0135	0.0155	0.0154
	0.0052	0.0077	0.0095	0.0074	0.0105	0.0135	0.0155	0.0154
	0.0052	0.0077	0.0094	0.0073	0.0104	0.0134	0.0153	0.0153
	0.0052	0.0077	0.0094	0.0073	0.0104	0.0134	0.0153	0.0153
	0.0052	0.0076	0.0094	0.0073	0.0103	0.0134	0.0152	0.0153
	0.0052	0.0076	0.0093	0.0072	0.0103	0.0133	0.0151	0.0152
	0.0051	0.0076	0.0093	0.0072	0.0103	0.0133	0.0151	0.0151
	0.0051	0.0075	0.0093	0.0072	0.0103	0.0133	0.015	0.0151
	0.0051	0.0075	0.0093	0.0072	0.0102	0.0132	0.015	0.0151
	0.0051	0.0075	0.0093	0.0072	0.0102	0.0132	0.015	0.015
	0.0051	0.0075	0.0093	0.0072	0.0101	0.0132	0.0149	0.015
	0.0051	0.0075	0.0092	0.0072	0.0101	0.0132	0.0149	0.0149
	0.005	0.0075	0.0092	0.0072	0.0101	0.0131	0.0148	0.0149
	0.005	0.0075	0.0092	0.0071	0.0101	0.0131	0.0148	0.0149
	0.005	0.0074	0.0091	0.0071	0.0101	0.0131	0.0148	0.0148
	0.005	0.0074	0.0091	0.0071	0.01	0.013	0.0148	0.0148
	0.005	0.0074	0.0091	0.0071	0.01	0.013	0.0148	0.0148
	0.005	0.0074	0.0091	0.007	0.01	0.013	0.0148	0.0148
	0.005	0.0074	0.0091	0.007	0.01	0.013	0.0148	0.0148
	0.0049	0.0073	0.009	0.0069	0.01	0.0129	0.0148	0.0147
	0.0049	0.0073	0.009	0.0069	0.01	0.0129	0.0148	0.0147
	0.0049	0.0073	0.009	0.0069	0.0099	0.0129	0.0147	0.0147
	0.0049	0.0073	0.0089	0.0069	0.0099	0.0129	0.0147	0.0146
	0.0049	0.0072	0.0089	0.0069	0.0099	0.0129	0.0147	0.0146
	0.0049	0.0072	0.0089	0.0068	0.0099	0.0128	0.0146	0.0146
	0.0049	0.0072	0.0089	0.0068	0.0098	0.0128	0.0146	0.0146
	0.0048	0.0071	0.0088	0.0068	0.0098	0.0128	0.0145	0.0145
	0.0048	0.0071	0.0088	0.0068	0.0097	0.0128	0.0145	0.0144
	0.0048	0.0071	0.0088	0.0068	0.0097	0.0128	0.0145	0.0144
	0.0048	0.007	0.0088	0.0068	0.0097	0.0128	0.0144	0.0144
	0.0048	0.007	0.0088	0.0068	0.0097	0.0127	0.0144	0.0144
	0.0048	0.007	0.0088	0.0067	0.0097	0.0127	0.0143	0.0144
	0.0048	0.0069	0.0088	0.0067	0.0097	0.0127	0.0142	0.0144
	0.0048	0.0069	0.0088	0.0066	0.0097	0.0127	0.0142	0.0143
	0.0048	0.0069	0.0088	0.0066	0.0096	0.0127	0.0142	0.0143
	0.0048	0.0069	0.0087	0.0066	0.0096	0.0127	0.0141	0.0143
	0.0048	0.0068	0.0087	0.0066	0.0096	0.0126	0.0141	0.0143
	0.0048	0.0068	0.0087	0.0066	0.0096	0.0126	0.0141	0.0143
	0.0048	0.0068	0.0087	0.0066	0.0096	0.0126	0.0141	0.0142
	0.0048	0.0068	0.0086	0.0066	0.0096	0.0126	0.0139	0.0141
	0.0048	0.0068	0.0086	0.0066	0.0095	0.0126	0.0139	0.0141
	0.0047	0.0068	0.0086	0.0066	0.0094	0.0125	0.0138	0.0141
	0.0047	0.0068	0.0086	0.0066	0.0094	0.0125	0.0138	0.014
	0.0047	0.0067	0.0085	0.0065	0.0094	0.0123	0.0137	0.014
	0.0047	0.0067	0.0085	0.0065	0.0094	0.0123	0.0137	0.0139
	0.0046	0.0066	0.0084	0.0064	0.0093	0.0123	0.0137	0.0139
	0.0046	0.0066	0.0084	0.0064	0.0092	0.0122	0.0137	0.0139
	0.0045	0.0066	0.0084	0.0064	0.0092	0.0122	0.0137	0.0139
	0.0045	0.0066	0.0083	0.0063	0.0092	0.0122	0.0136	0.0138
	0.0045	0.0066	0.0083	0.0063	0.0092	0.0122	0.0136	0.0138
	0.0045	0.0066	0.0083	0.0063	0.0092	0.0121	0.0136	0.0137
	0.0045	0.0065	0.0083	0.0063	0.0091	0.0121	0.0136	0.0137
	0.0045	0.0065	0.0083	0.0063	0.0091	0.012	0.0136	0.0137
	0.0045	0.0064	0.0083	0.0063	0.0091	0.012	0.0135	0.0137
	0.0045	0.0064	0.0083	0.0063	0.0091	0.0119	0.0135	0.0137
	0.0045	0.0064	0.0083	0.0063	0.0091	0.0119	0.0135	0.0136
	0.0044	0.0064	0.0082	0.0063	0.009	0.0119	0.0135	0.0135
	0.0044	0.0064	0.0081	0.0062	0.009	0.0119	0.0134	0.0135
	0.0044	0.0064	0.0081	0.0062	0.009	0.0118	0.0134	0.0135
	0.0044	0.0063	0.0081	0.0062	0.009	0.0118	0.0134	0.0135
	0.0044	0.0063	0.008	0.0062	0.009	0.0117	0.0133	0.0135
	0.0044	0.0062	0.008	0.0062	0.0089	0.0116	0.0133	0.0135
	0.0043	0.0062	0.008	0.0062	0.0089	0.0116	0.0133	0.0135
	0.0043	0.0062	0.0079	0.0062	0.0089	0.0116	0.0133	0.0134
	0.0043	0.0061	0.0079	0.0062	0.0089	0.0115	0.0133	0.0134
	0.0043	0.0061	0.0079	0.0062	0.0088	0.0115	0.0132	0.0133
	0.0043	0.0061	0.0079	0.0062	0.0088	0.0114	0.0132	0.0133
	0.0043	0.0061	0.0079	0.0061	0.0087	0.0114	0.0132	0.0133
	0.0043	0.006	0.0079	0.0061	0.0086	0.0114	0.0131	0.0133
	0.0042	0.006	0.0078	0.0061	0.0086	0.0114	0.0131	0.0133
	0.0042	0.006	0.0078	0.0061	0.0086	0.0113	0.0131	0.0132
	0.0042	0.006	0.0078	0.006	0.0086	0.0113	0.0131	0.0131
	0.0042	0.0059	0.0078	0.006	0.0085	0.0113	0.013	0.0131
	0.0042	0.0059	0.0078	0.006	0.0085	0.0113	0.013	0.0131
	0.0041	0.0059	0.0078	0.006	0.0085	0.0112	0.013	0.0131
	0.0041	0.0059	0.0077	0.006	0.0085	0.0112	0.0129	0.0131
	0.0041	0.0059	0.0077	0.006	0.0085	0.0112	0.0129	0.013
	0.0041	0.0058	0.0077	0.0059	0.0084	0.0111	0.0128	0.013
	0.0041	0.0058	0.0077	0.0059	0.0084	0.0111	0.0128	0.0129
	0.0041	0.0058	0.0077	0.0059	0.0084	0.0111	0.0128	0.0128
	0.0041	0.0058	0.0077	0.0058	0.0084	0.011	0.0128	0.0128
	0.0041	0.0058	0.0075	0.0058	0.0084	0.011	0.0127	0.0128
	0.0041	0.0058	0.0075	0.0058	0.0083	0.011	0.0127	0.0128
	0.0041	0.0057	0.0074	0.0058	0.0083	0.011	0.0126	0.0127
	0.0041	0.0057	0.0074	0.0058	0.0083	0.011	0.0126	0.0126
	0.0041	0.0057	0.0074	0.0058	0.0083	0.0109	0.0126	0.0125
	0.004	0.0057	0.0074	0.0058	0.0083	0.0109	0.0125	0.0125
	0.004	0.0057	0.0074	0.0058	0.0083	0.0109	0.0125	0.0124
	0.004	0.0056	0.0073	0.0058	0.0083	0.0109	0.0125	0.0124
	0.004	0.0056	0.0073	0.0058	0.0082	0.0109	0.0125	0.0124
	0.004	0.0056	0.0073	0.0058	0.0082	0.0108	0.0124	0.0123
	0.004	0.0056	0.0073	0.0058	0.0082	0.0108	0.0124	0.0123
	0.004	0.0056	0.0073	0.0057	0.0081	0.0107	0.0124	0.0123
	0.004	0.0056	0.0073	0.0057	0.0081	0.0107	0.0124	0.0123
	0.004	0.0056	0.0073	0.0057	0.0081	0.0106	0.0124	0.0123
	0.004	0.0055	0.0072	0.0057	0.0081	0.0106	0.0123	0.0123
	0.0039	0.0055	0.0071	0.0057	0.0081	0.0105	0.0123	0.0123
	0.0039	0.0055	0.0071	0.0057	0.0081	0.0105	0.0123	0.0122
	0.0039	0.0055	0.0071	0.0056	0.0081	0.0104	0.0122	0.0122
	0.0039	0.0055	0.0071	0.0056	0.008	0.0104	0.0122	0.0122
	0.0039	0.0054	0.0071	0.0056	0.008	0.0103	0.0122	0.0122
	0.0039	0.0054	0.0071	0.0056	0.008	0.0103	0.0122	0.0121
	0.0039	0.0054	0.0071	0.0056	0.008	0.0103	0.0121	0.0121
	0.0038	0.0054	0.007	0.0056	0.008	0.0103	0.0121	0.0121
	0.0038	0.0054	0.007	0.0056	0.0079	0.0102	0.012	0.012
	0.0038	0.0054	0.007	0.0056	0.0079	0.0102	0.0119	0.012
	0.0038	0.0054	0.007	0.0055	0.0079	0.0102	0.0118	0.012
	0.0038	0.0054	0.007	0.0055	0.0079	0.0102	0.0118	0.012
	0.0037	0.0054	0.0069	0.0055	0.0079	0.0102	0.0118	0.012
	0.0037	0.0053	0.0069	0.0055	0.0079	0.0102	0.0118	0.0119
	0.0037	0.0053	0.0069	0.0055	0.0078	0.0101	0.0117	0.0119
	0.0037	0.0053	0.0069	0.0055	0.0078	0.0101	0.0116	0.0119
	0.0037	0.0053	0.0069	0.0055	0.0078	0.0101	0.0116	0.0119
	0.0037	0.0052	0.0069	0.0055	0.0078	0.0101	0.0116	0.0119
	0.0037	0.0052	0.0068	0.0054	0.0077	0.0101	0.0116	0.0118
	0.0036	0.0052	0.0068	0.0054	0.0077	0.0101	0.0116	0.0118
	0.0036	0.0052	0.0068	0.0054	0.0077	0.0101	0.0116	0.0118
	0.0036	0.0052	0.0068	0.0053	0.0077	0.0101	0.0115	0.0118
	0.0036	0.0052	0.0068	0.0053	0.0076	0.0101	0.0115	0.0118
	0.0036	0.0052	0.0067	0.0053	0.0076	0.0101	0.0115	0.0117
	0.0036	0.0051	0.0067	0.0053	0.0076	0.0101	0.0114	0.0116
	0.0036	0.0051	0.0067	0.0053	0.0076	0.0101	0.0114	0.0116
	0.0036	0.0051	0.0067	0.0053	0.0076	0.01	0.0114	0.0115
	0.0036	0.005	0.0067	0.0053	0.0076	0.01	0.0113	0.0115
	0.0036	0.005	0.0066	0.0053	0.0075	0.01	0.0113	0.0115
	0.0036	0.005	0.0066	0.0053	0.0075	0.0099	0.0113	0.0115
	0.0036	0.005	0.0066	0.0053	0.0075	0.0099	0.0113	0.0115
	0.0036	0.005	0.0066	0.0053	0.0075	0.0099	0.0113	0.0114
	0.0035	0.0049	0.0066	0.0053	0.0075	0.0099	0.0113	0.0114
	0.0035	0.0049	0.0066	0.0053	0.0075	0.0098	0.0113	0.0114
	0.0035	0.0049	0.0065	0.0053	0.0075	0.0098	0.0112	0.0114
	0.0035	0.0049	0.0065	0.0053	0.0074	0.0098	0.0112	0.0113
	0.0035	0.0049	0.0065	0.0053	0.0074	0.0098	0.0111	0.0113
	0.0035	0.0049	0.0065	0.0052	0.0074	0.0098	0.0111	0.0113
	0.0035	0.0049	0.0065	0.0052	0.0074	0.0098	0.0111	0.0113
	0.0035	0.0049	0.0065	0.0052	0.0074	0.0098	0.0111	0.0113
	0.0035	0.0047	0.0064	0.0052	0.0074	0.0097	0.0111	0.0113
	0.0035	0.0047	0.0064	0.0052	0.0073	0.0096	0.011	0.0112
	0.0034	0.0047	0.0064	0.0052	0.0073	0.0096	0.011	0.0112
	0.0034	0.0046	0.0064	0.0052	0.0073	0.0096	0.011	0.0112
	0.0034	0.0046	0.0064	0.0052	0.0072	0.0096	0.0109	0.0111
	0.0034	0.0046	0.0064	0.0052	0.0072	0.0096	0.0109	0.0111
	0.0034	0.0045	0.0063	0.0052	0.0072	0.0096	0.0109	0.0111
	0.0034	0.0045	0.0063	0.0051	0.0072	0.0095	0.0109	0.0111
	0.0034	0.0045	0.0062	0.0051	0.0071	0.0095	0.0109	0.0111
	0.0034	0.0045	0.0062	0.0051	0.0071	0.0095	0.0109	0.0111
	0.0033	0.0045	0.0062	0.0051	0.007	0.0094	0.0109	0.011
	0.0033	0.0045	0.0062	0.0051	0.007	0.0094	0.0108	0.011
	0.0033	0.0045	0.0062	0.0051	0.007	0.0094	0.0108	0.011
	0.0033	0.0045	0.0061	0.0051	0.007	0.0094	0.0107	0.011
	0.0032	0.0045	0.0061	0.0051	0.007	0.0093	0.0107	0.011
	0.0032	0.0044	0.0061	0.0051	0.0069	0.0093	0.0107	0.011
	0.0032	0.0044	0.0061	0.0051	0.0069	0.0092	0.0107	0.0108
	0.0032	0.0044	0.0061	0.005	0.0069	0.0092	0.0107	0.0108
	0.0032	0.0044	0.0061	0.005	0.0069	0.0092	0.0107	0.0108
	0.0032	0.0043	0.0061	0.005	0.0069	0.0092	0.0107	0.0108
	0.0031	0.0043	0.0061	0.005	0.0069	0.0092	0.0107	0.0108
	0.0031	0.0043	0.006	0.005	0.0068	0.0092	0.0106	0.0108
	0.0031	0.0043	0.006	0.005	0.0068	0.0092	0.0106	0.0108
	0.0031	0.0043	0.006	0.005	0.0068	0.0092	0.0106	0.0108
	0.0031	0.0043	0.006	0.0049	0.0068	0.0092	0.0106	0.0107
	0.0031	0.0043	0.0059	0.0049	0.0068	0.0091	0.0106	0.0107
	0.0031	0.0043	0.0059	0.0049	0.0068	0.0091	0.0106	0.0107
	0.0031	0.0043	0.0058	0.0049	0.0068	0.0091	0.0106	0.0107
	0.0031	0.0042	0.0058	0.0049	0.0068	0.0091	0.0106	0.0107
	0.0031	0.0042	0.0058	0.0049	0.0068	0.009	0.0106	0.0107
	0.0031	0.0042	0.0058	0.0049	0.0067	0.009	0.0105	0.0107
	0.0031	0.0042	0.0057	0.0049	0.0067	0.009	0.0105	0.0106
	0.003	0.0042	0.0057	0.0049	0.0067	0.0089	0.0105	0.0106
	0.003	0.0042	0.0057	0.0049	0.0067	0.0089	0.0105	0.0106
	0.003	0.0042	0.0057	0.0049	0.0067	0.0089	0.0104	0.0106
	0.003	0.0041	0.0057	0.0048	0.0066	0.0089	0.0104	0.0106
	0.003	0.0041	0.0056	0.0048	0.0066	0.0088	0.0104	0.0105
	0.003	0.0041	0.0056	0.0048	0.0066	0.0088	0.0104	0.0105
	0.003	0.0041	0.0056	0.0048	0.0066	0.0088	0.0104	0.0105
	0.003	0.0041	0.0056	0.0048	0.0066	0.0088	0.0103	0.0105
	0.003	0.0041	0.0056	0.0048	0.0065	0.0088	0.0103	0.0105
	0.003	0.0041	0.0056	0.0048	0.0065	0.0087	0.0102	0.0105
	0.0029	0.0041	0.0055	0.0048	0.0065	0.0087	0.0102	0.0105
	0.0029	0.004	0.0055	0.0048	0.0064	0.0087	0.0102	0.0105
	0.0029	0.004	0.0055	0.0047	0.0064	0.0087	0.0102	0.0105
	0.0029	0.004	0.0055	0.0047	0.0064	0.0087	0.0102	0.0105
	0.0029	0.004	0.0055	0.0047	0.0064	0.0087	0.0102	0.0105
	0.0029	0.004	0.0055	0.0047	0.0064	0.0086	0.0101	0.0104
	0.0029	0.004	0.0055	0.0047	0.0064	0.0086	0.0101	0.0104
	0.0028	0.004	0.0055	0.0047	0.0064	0.0086	0.0101	0.0104
	0.0028	0.004	0.0055	0.0047	0.0064	0.0085	0.0101	0.0104
	0.0028	0.004	0.0054	0.0047	0.0063	0.0085	0.01	0.0103
	0.0028	0.0039	0.0054	0.0047	0.0063	0.0085	0.01	0.0103
	0.0028	0.0039	0.0054	0.0047	0.0063	0.0085	0.01	0.0103
	0.0028	0.0039	0.0054	0.0047	0.0063	0.0085	0.01	0.0102
	0.0028	0.0039	0.0054	0.0046	0.0063	0.0085	0.01	0.0102
	0.0028	0.0039	0.0054	0.0046	0.0063	0.0084	0.01	0.0102
	0.0028	0.0038	0.0054	0.0046	0.0062	0.0084	0.01	0.0101
	0.0027	0.0038	0.0054	0.0046	0.0062	0.0084	0.01	0.0101
	0.0027	0.0038	0.0053	0.0046	0.0062	0.0084	0.01	0.0101
	0.0027	0.0038	0.0053	0.0046	0.0062	0.0083	0.0099	0.0101
	0.0027	0.0038	0.0053	0.0045	0.0061	0.0083	0.0099	0.0101
	0.0027	0.0038	0.0053	0.0045	0.0061	0.0083	0.0099	0.0101
	0.0027	0.0037	0.0053	0.0045	0.0061	0.0082	0.0099	0.0101
	0.0027	0.0037	0.0053	0.0045	0.0061	0.0082	0.0099	0.01
	0.0027	0.0037	0.0053	0.0045	0.0061	0.0082	0.0098	0.01
	0.0026	0.0037	0.0053	0.0045	0.0061	0.0081	0.0098	0.01
	0.0026	0.0037	0.0053	0.0045	0.0061	0.008	0.0098	0.01
	0.0026	0.0037	0.0052	0.0045	0.006	0.008	0.0098	0.01
	0.0026	0.0037	0.0052	0.0045	0.006	0.008	0.0098	0.0099
	0.0026	0.0037	0.0052	0.0045	0.006	0.0079	0.0098	0.0099
	0.0026	0.0037	0.0052	0.0044	0.006	0.0079	0.0097	0.0099
	0.0026	0.0037	0.0052	0.0044	0.006	0.0079	0.0097	0.0099
	0.0026	0.0037	0.0052	0.0044	0.006	0.0079	0.0097	0.0099
	0.0025	0.0036	0.0052	0.0044	0.006	0.0079	0.0096	0.0098
	0.0025	0.0036	0.0051	0.0044	0.006	0.0078	0.0096	0.0098
	0.0025	0.0036	0.0051	0.0044	0.0059	0.0078	0.0096	0.0097
	0.0025	0.0036	0.0051	0.0044	0.0059	0.0078	0.0095	0.0097
	0.0025	0.0036	0.0051	0.0043	0.0059	0.0078	0.0095	0.0097
	0.0025	0.0036	0.0051	0.0043	0.0058	0.0078	0.0095	0.0097
	0.0025	0.0036	0.005	0.0043	0.0058	0.0078	0.0095	0.0097
	0.0025	0.0036	0.005	0.0043	0.0058	0.0077	0.0094	0.0097
	0.0025	0.0036	0.005	0.0043	0.0058	0.0077	0.0094	0.0097
	0.0025	0.0036	0.005	0.0043	0.0058	0.0077	0.0094	0.0097
	0.0025	0.0035	0.0049	0.0043	0.0057	0.0077	0.0094	0.0097
	0.0025	0.0035	0.0049	0.0042	0.0057	0.0077	0.0094	0.0097
	0.0024	0.0035	0.0049	0.0042	0.0057	0.0077	0.0094	0.0096
	0.0024	0.0035	0.0049	0.0042	0.0057	0.0077	0.0094	0.0096
	0.0024	0.0035	0.0049	0.0042	0.0057	0.0077	0.0093	0.0096
	0.0024	0.0034	0.0048	0.0042	0.0057	0.0077	0.0093	0.0096
	0.0024	0.0034	0.0048	0.0042	0.0057	0.0076	0.0093	0.0095
	0.0024	0.0034	0.0048	0.0042	0.0057	0.0076	0.0093	0.0095
	0.0024	0.0034	0.0048	0.0042	0.0057	0.0076	0.0093	0.0095
	0.0024	0.0034	0.0048	0.0042	0.0057	0.0076	0.0093	0.0095
	0.0024	0.0034	0.0048	0.0042	0.0057	0.0076	0.0093	0.0095
	0.0024	0.0034	0.0048	0.0041	0.0057	0.0076	0.0092	0.0095
	0.0024	0.0034	0.0048	0.0041	0.0057	0.0076	0.0092	0.0095
	0.0023	0.0033	0.0048	0.0041	0.0056	0.0076	0.0092	0.0095
	0.0023	0.0033	0.0048	0.0041	0.0056	0.0075	0.0092	0.0095
	0.0023	0.0033	0.0048	0.0041	0.0056	0.0075	0.0092	0.0095
	0.0023	0.0033	0.0048	0.0041	0.0056	0.0075	0.0091	0.0095
	0.0022	0.0033	0.0047	0.0041	0.0056	0.0075	0.0091	0.0094
	0.0022	0.0033	0.0047	0.0041	0.0056	0.0075	0.0091	0.0094
	0.0022	0.0033	0.0047	0.0041	0.0056	0.0075	0.009	0.0094
	0.0022	0.0033	0.0047	0.0041	0.0055	0.0075	0.009	0.0094
	0.0022	0.0033	0.0047	0.004	0.0055	0.0075	0.009	0.0094
	0.0022	0.0033	0.0047	0.004	0.0055	0.0075	0.009	0.0094
	0.0022	0.0032	0.0047	0.004	0.0055	0.0074	0.009	0.0093
	0.0022	0.0032	0.0046	0.004	0.0055	0.0074	0.009	0.0093
	0.0022	0.0032	0.0046	0.004	0.0055	0.0074	0.0089	0.0093
	0.0022	0.0032	0.0046	0.004	0.0054	0.0074	0.0089	0.0093
	0.0022	0.0031	0.0046	0.004	0.0054	0.0073	0.0089	0.0093
	0.0022	0.0031	0.0046	0.004	0.0054	0.0073	0.0089	0.0093
	0.0022	0.0031	0.0046	0.004	0.0054	0.0073	0.0089	0.0093
	0.0022	0.0031	0.0046	0.004	0.0054	0.0073	0.0088	0.0093
	0.0021	0.0031	0.0045	0.004	0.0053	0.0073	0.0088	0.0092
	0.0021	0.0031	0.0045	0.004	0.0053	0.0073	0.0088	0.0092
	0.0021	0.0031	0.0045	0.004	0.0053	0.0073	0.0088	0.0092
	0.0021	0.0031	0.0045	0.004	0.0053	0.0073	0.0087	0.0092
	0.0021	0.0031	0.0045	0.0039	0.0053	0.0073	0.0087	0.0092
	0.0021	0.003	0.0044	0.0039	0.0053	0.0072	0.0087	0.0092
	0.0021	0.003	0.0044	0.0039	0.0053	0.0072	0.0087	0.0092
	0.0021	0.003	0.0044	0.0039	0.0053	0.0072	0.0087	0.0092
	0.0021	0.003	0.0044	0.0039	0.0053	0.0072	0.0087	0.0091
	0.0021	0.003	0.0044	0.0039	0.0053	0.0072	0.0087	0.0091
	0.002	0.003	0.0043	0.0039	0.0053	0.0072	0.0086	0.0091
	0.002	0.0029	0.0043	0.0039	0.0052	0.0071	0.0086	0.0091
	0.002	0.0029	0.0043	0.0039	0.0052	0.0071	0.0086	0.0091
	0.002	0.0029	0.0042	0.0038	0.0052	0.007	0.0086	0.0091
	0.002	0.0029	0.0042	0.0038	0.0052	0.007	0.0086	0.0091
	0.002	0.0029	0.0042	0.0038	0.0052	0.007	0.0086	0.0091
	0.002	0.0029	0.0042	0.0038	0.0052	0.007	0.0086	0.009
	0.002	0.0029	0.0042	0.0038	0.0052	0.007	0.0085	0.009
	0.0019	0.0029	0.0042	0.0038	0.0052	0.0069	0.0085	0.009
	0.0019	0.0029	0.0042	0.0038	0.0051	0.0069	0.0085	0.009
	0.0019	0.0029	0.0042	0.0038	0.0051	0.0069	0.0085	0.009
	0.0019	0.0029	0.0042	0.0038	0.0051	0.0069	0.0085	0.009
	0.0019	0.0028	0.0042	0.0037	0.0051	0.0068	0.0085	0.009
	0.0019	0.0028	0.0041	0.0037	0.0051	0.0068	0.0085	0.0089
	0.0019	0.0028	0.0041	0.0037	0.0051	0.0068	0.0085	0.0089
	0.0018	0.0028	0.0041	0.0037	0.005	0.0067	0.0085	0.0089
	0.0018	0.0028	0.0041	0.0037	0.005	0.0067	0.0085	0.0089
	0.0018	0.0028	0.0041	0.0037	0.005	0.0067	0.0084	0.0089
	0.0018	0.0028	0.0041	0.0037	0.005	0.0067	0.0084	0.0088
	0.0018	0.0027	0.0041	0.0037	0.005	0.0067	0.0084	0.0088
	0.0018	0.0027	0.0041	0.0037	0.0049	0.0067	0.0084	0.0088
	0.0018	0.0027	0.004	0.0037	0.0049	0.0067	0.0084	0.0088
	0.0018	0.0027	0.004	0.0036	0.0049	0.0066	0.0084	0.0088
	0.0018	0.0026	0.004	0.0036	0.0049	0.0066	0.0083	0.0087
	0.0018	0.0026	0.004	0.0036	0.0049	0.0066	0.0083	0.0087
	0.0018	0.0026	0.004	0.0036	0.0049	0.0066	0.0083	0.0087
	0.0018	0.0026	0.004	0.0036	0.0049	0.0066	0.0083	0.0087
	0.0018	0.0026	0.0039	0.0036	0.0049	0.0066	0.0083	0.0087
	0.0018	0.0025	0.0039	0.0036	0.0048	0.0066	0.0083	0.0087
	0.0018	0.0025	0.0038	0.0036	0.0048	0.0065	0.0083	0.0087
	0.0017	0.0024	0.0038	0.0036	0.0048	0.0065	0.0082	0.0087
	0.0017	0.0024	0.0038	0.0035	0.0048	0.0065	0.0082	0.0087
	0.0017	0.0024	0.0038	0.0035	0.0048	0.0065	0.0082	0.0087
	0.0017	0.0024	0.0038	0.0035	0.0048	0.0065	0.0081	0.0086
	0.0017	0.0024	0.0038	0.0035	0.0048	0.0065	0.0081	0.0086
	0.0017	0.0024	0.0038	0.0035	0.0048	0.0065	0.0081	0.0086
	0.0017	0.0024	0.0037	0.0035	0.0048	0.0065	0.0081	0.0086
	0.0017	0.0024	0.0037	0.0035	0.0048	0.0065	0.0081	0.0086
	0.0017	0.0024	0.0037	0.0035	0.0048	0.0065	0.0081	0.0086
	0.0016	0.0024	0.0037	0.0035	0.0048	0.0064	0.0081	0.0086
	0.0016	0.0024	0.0037	0.0035	0.0047	0.0064	0.0081	0.0086
	0.0016	0.0024	0.0037	0.0035	0.0047	0.0064	0.0081	0.0086
	0.0016	0.0024	0.0037	0.0035	0.0047	0.0064	0.0081	0.0085
	0.0016	0.0023	0.0036	0.0035	0.0047	0.0064	0.008	0.0085
	0.0016	0.0023	0.0036	0.0034	0.0047	0.0064	0.008	0.0085
	0.0016	0.0023	0.0036	0.0034	0.0047	0.0064	0.008	0.0085
	0.0016	0.0023	0.0036	0.0034	0.0047	0.0064	0.008	0.0085
	0.0016	0.0023	0.0036	0.0034	0.0047	0.0064	0.008	0.0085
	0.0016	0.0023	0.0035	0.0034	0.0047	0.0064	0.008	0.0085
	0.0016	0.0022	0.0035	0.0034	0.0047	0.0064	0.008	0.0085
	0.0016	0.0022	0.0035	0.0034	0.0047	0.0064	0.008	0.0085
	0.0016	0.0022	0.0035	0.0034	0.0047	0.0063	0.008	0.0084
	0.0016	0.0022	0.0035	0.0034	0.0047	0.0063	0.0079	0.0083
	0.0016	0.0022	0.0035	0.0034	0.0046	0.0063	0.0079	0.0083
	0.0015	0.0022	0.0035	0.0034	0.0046	0.0063	0.0079	0.0083
	0.0015	0.0022	0.0035	0.0034	0.0046	0.0063	0.0078	0.0083
	0.0015	0.0022	0.0034	0.0033	0.0046	0.0063	0.0078	0.0083
	0.0015	0.0022	0.0034	0.0033	0.0046	0.0063	0.0078	0.0083
	0.0015	0.0022	0.0034	0.0033	0.0046	0.0063	0.0078	0.0083
	0.0015	0.0022	0.0034	0.0033	0.0046	0.0063	0.0078	0.0083
	0.0015	0.0021	0.0034	0.0033	0.0046	0.0062	0.0078	0.0083
	0.0015	0.0021	0.0033	0.0033	0.0045	0.0062	0.0077	0.0082
	0.0015	0.0021	0.0033	0.0033	0.0045	0.0062	0.0077	0.0082
	0.0015	0.0021	0.0033	0.0033	0.0045	0.0062	0.0077	0.0082
	0.0015	0.0021	0.0033	0.0033	0.0045	0.0062	0.0077	0.0082
	0.0014	0.0021	0.0033	0.0033	0.0045	0.0062	0.0077	0.0082
	0.0014	0.002	0.0033	0.0033	0.0045	0.0062	0.0077	0.0082
	0.0014	0.002	0.0033	0.0033	0.0045	0.0062	0.0076	0.0082
	0.0014	0.002	0.0032	0.0033	0.0045	0.0062	0.0076	0.0082
	0.0014	0.002	0.0032	0.0033	0.0045	0.0062	0.0076	0.0082
	0.0014	0.002	0.0032	0.0032	0.0045	0.0061	0.0076	0.0081
	0.0014	0.002	0.0032	0.0032	0.0044	0.0061	0.0076	0.0081
	0.0014	0.002	0.0032	0.0032	0.0044	0.0061	0.0076	0.0081
	0.0014	0.0019	0.0032	0.0032	0.0044	0.0061	0.0076	0.0081
	0.0014	0.0019	0.0032	0.0032	0.0044	0.0061	0.0075	0.0081
	0.0014	0.0019	0.0032	0.0032	0.0044	0.0061	0.0075	0.0081
	0.0014	0.0019	0.0031	0.0032	0.0044	0.006	0.0075	0.0081
	0.0014	0.0019	0.0031	0.0032	0.0044	0.006	0.0075	0.008
	0.0013	0.0019	0.0031	0.0032	0.0044	0.0059	0.0075	0.008
	0.0013	0.0019	0.0031	0.0032	0.0044	0.0059	0.0075	0.008
	0.0013	0.0019	0.0031	0.0032	0.0043	0.0059	0.0075	0.008
	0.0013	0.0019	0.0031	0.0031	0.0043	0.0059	0.0074	0.008
	0.0013	0.0019	0.0031	0.0031	0.0043	0.0059	0.0074	0.008
	0.0013	0.0018	0.0031	0.0031	0.0043	0.0059	0.0074	0.008
	0.0013	0.0018	0.0031	0.0031	0.0043	0.0059	0.0074	0.008
	0.0013	0.0018	0.0031	0.0031	0.0043	0.0059	0.0074	0.008
	0.0013	0.0018	0.0031	0.0031	0.0043	0.0059	0.0074	0.0079
	0.0013	0.0018	0.0031	0.0031	0.0043	0.0059	0.0074	0.0079
	0.0012	0.0018	0.0031	0.0031	0.0043	0.0059	0.0074	0.0079
	0.0012	0.0017	0.0031	0.0031	0.0043	0.0058	0.0074	0.0079
	0.0012	0.0017	0.0031	0.0031	0.0043	0.0058	0.0074	0.0079
	0.0012	0.0017	0.0031	0.0031	0.0043	0.0058	0.0074	0.0079
	0.0012	0.0017	0.0031	0.0031	0.0043	0.0058	0.0073	0.0079
	0.0012	0.0017	0.0031	0.0031	0.0043	0.0058	0.0073	0.0078
	0.0012	0.0017	0.003	0.0031	0.0043	0.0058	0.0073	0.0078
	0.0012	0.0017	0.003	0.0031	0.0043	0.0058	0.0073	0.0078
	0.0012	0.0016	0.003	0.003	0.0043	0.0057	0.0073	0.0078
	0.0012	0.0016	0.003	0.003	0.0042	0.0057	0.0073	0.0078
	0.0011	0.0016	0.003	0.003	0.0042	0.0057	0.0073	0.0077
	0.0011	0.0016	0.003	0.003	0.0042	0.0057	0.0073	0.0077
	0.0011	0.0016	0.003	0.003	0.0042	0.0057	0.0072	0.0077
	0.0011	0.0016	0.0029	0.003	0.0042	0.0057	0.0072	0.0077
	0.0011	0.0016	0.0029	0.003	0.0042	0.0057	0.0072	0.0077
	0.0011	0.0016	0.0029	0.003	0.0042	0.0057	0.0072	0.0077
	0.0011	0.0016	0.0029	0.0029	0.0042	0.0056	0.0072	0.0077
	0.0011	0.0016	0.0029	0.0029	0.0042	0.0056	0.0072	0.0077
	0.0011	0.0016	0.0029	0.0029	0.0042	0.0056	0.0072	0.0076
	0.001	0.0016	0.0029	0.0029	0.0041	0.0056	0.0071	0.0076
	0.001	0.0016	0.0029	0.0029	0.0041	0.0056	0.0071	0.0075
	0.001	0.0015	0.0029	0.0029	0.0041	0.0056	0.007	0.0075
	0.001	0.0015	0.0029	0.0029	0.0041	0.0056	0.007	0.0075
	0.001	0.0015	0.0028	0.0029	0.0041	0.0055	0.007	0.0075
	0.001	0.0015	0.0028	0.0029	0.0041	0.0055	0.007	0.0075
	0.001	0.0015	0.0028	0.0029	0.0041	0.0055	0.007	0.0075
	0.001	0.0015	0.0028	0.0029	0.0041	0.0055	0.007	0.0075
	0.001	0.0015	0.0028	0.0028	0.0041	0.0055	0.007	0.0075
	0.001	0.0014	0.0028	0.0028	0.0041	0.0055	0.007	0.0075
	0.001	0.0014	0.0027	0.0028	0.0041	0.0055	0.0069	0.0075
	0.001	0.0014	0.0027	0.0028	0.0041	0.0055	0.0069	0.0074
	0.001	0.0014	0.0027	0.0028	0.0041	0.0055	0.0069	0.0074
	0.001	0.0014	0.0027	0.0028	0.0041	0.0055	0.0069	0.0074
	0.001	0.0014	0.0027	0.0028	0.0041	0.0054	0.0068	0.0074
	0.001	0.0014	0.0027	0.0028	0.004	0.0054	0.0068	0.0074
	0.0009	0.0014	0.0026	0.0028	0.004	0.0054	0.0068	0.0074
	0.0009	0.0014	0.0026	0.0028	0.004	0.0054	0.0068	0.0074
	0.0009	0.0013	0.0026	0.0028	0.004	0.0054	0.0068	0.0074
	0.0009	0.0013	0.0026	0.0028	0.004	0.0054	0.0068	0.0074
	0.0009	0.0013	0.0026	0.0028	0.004	0.0054	0.0068	0.0074
	0.0009	0.0013	0.0026	0.0028	0.0039	0.0054	0.0068	0.0074
	0.0009	0.0013	0.0025	0.0027	0.0039	0.0054	0.0068	0.0074
	0.0009	0.0013	0.0025	0.0027	0.0039	0.0053	0.0068	0.0073
	0.0009	0.0013	0.0025	0.0027	0.0039	0.0053	0.0068	0.0073
	0.0009	0.0013	0.0025	0.0027	0.0039	0.0053	0.0067	0.0073
	0.0008	0.0013	0.0025	0.0027	0.0039	0.0053	0.0067	0.0073
	0.0008	0.0013	0.0025	0.0027	0.0039	0.0053	0.0067	0.0073
	0.0008	0.0013	0.0025	0.0027	0.0039	0.0053	0.0067	0.0073
	0.0008	0.0013	0.0025	0.0027	0.0039	0.0053	0.0067	0.0072
	0.0008	0.0013	0.0025	0.0027	0.0039	0.0053	0.0067	0.0072
	0.0008	0.0013	0.0025	0.0027	0.0039	0.0053	0.0067	0.0072
	0.0008	0.0012	0.0025	0.0026	0.0039	0.0053	0.0067	0.0072
	0.0008	0.0012	0.0024	0.0026	0.0039	0.0053	0.0067	0.0072
	0.0008	0.0012	0.0024	0.0026	0.0039	0.0053	0.0067	0.0072
	0.0008	0.0012	0.0024	0.0026	0.0039	0.0053	0.0067	0.0072
	0.0007	0.0012	0.0024	0.0026	0.0038	0.0052	0.0067	0.0072
	0.0007	0.0012	0.0024	0.0026	0.0038	0.0052	0.0067	0.0071
	0.0007	0.0012	0.0023	0.0026	0.0038	0.0052	0.0067	0.0071
	0.0007	0.0012	0.0023	0.0026	0.0038	0.0052	0.0067	0.0071
	0.0007	0.0012	0.0023	0.0026	0.0038	0.0052	0.0066	0.0071
	0.0007	0.0011	0.0023	0.0026	0.0038	0.0052	0.0066	0.0071
	0.0006	0.0011	0.0023	0.0026	0.0038	0.0052	0.0066	0.0071
	0.0006	0.0011	0.0023	0.0026	0.0038	0.0052	0.0066	0.0071
	0.0006	0.0011	0.0023	0.0026	0.0038	0.0052	0.0066	0.0071
	0.0006	0.0011	0.0023	0.0026	0.0038	0.0052	0.0066	0.0071
	0.0006	0.0011	0.0023	0.0025	0.0038	0.0052	0.0065	0.0071
	0.0006	0.0011	0.0023	0.0025	0.0038	0.0052	0.0065	0.0071
	0.0006	0.0011	0.0023	0.0025	0.0038	0.0052	0.0065	0.0071
	0.0006	0.0011	0.0022	0.0025	0.0038	0.0052	0.0065	0.0071
	0.0006	0.0011	0.0022	0.0025	0.0038	0.0052	0.0065	0.007
	0.0006	0.0011	0.0022	0.0025	0.0038	0.0051	0.0065	0.007
	0.0006	0.0011	0.0022	0.0025	0.0038	0.0051	0.0065	0.007
	0.0005	0.0011	0.0022	0.0025	0.0038	0.0051	0.0065	0.007
	0.0005	0.0011	0.0022	0.0025	0.0037	0.0051	0.0065	0.007
	0.0005	0.001	0.0022	0.0025	0.0037	0.0051	0.0065	0.007
	0.0005	0.001	0.0022	0.0025	0.0037	0.0051	0.0065	0.007
	0.0005	0.001	0.0022	0.0025	0.0037	0.0051	0.0065	0.007
	0.0005	0.001	0.0022	0.0025	0.0037	0.0051	0.0065	0.007
	0.0005	0.001	0.0021	0.0025	0.0037	0.0051	0.0065	0.007
	0.0005	0.001	0.0021	0.0025	0.0037	0.0051	0.0065	0.0069
	0.0005	0.001	0.0021	0.0025	0.0037	0.0051	0.0065	0.0069
	0.0005	0.001	0.0021	0.0024	0.0037	0.0051	0.0065	0.0069
	0.0004	0.001	0.0021	0.0024	0.0036	0.005	0.0065	0.0069
	0.0004	0.001	0.0021	0.0024	0.0036	0.005	0.0064	0.0069
	0.0004	0.0009	0.0021	0.0024	0.0036	0.005	0.0064	0.0069
	0.0004	0.0009	0.0021	0.0024	0.0036	0.005	0.0064	0.0069
	0.0004	0.0009	0.0021	0.0024	0.0036	0.005	0.0064	0.0069
	0.0004	0.0009	0.002	0.0024	0.0036	0.005	0.0064	0.0068
	0.0003	0.0009	0.002	0.0024	0.0036	0.005	0.0064	0.0068
	0.0003	0.0009	0.002	0.0024	0.0036	0.005	0.0064	0.0068
	0.0003	0.0009	0.002	0.0024	0.0036	0.005	0.0063	0.0068
	0.0003	0.0009	0.002	0.0024	0.0036	0.005	0.0063	0.0068
	0.0003	0.0009	0.002	0.0023	0.0036	0.005	0.0063	0.0068
	0.0003	0.0009	0.002	0.0023	0.0036	0.0049	0.0063	0.0068
	0.0003	0.0009	0.002	0.0023	0.0036	0.0049	0.0063	0.0068
	0.0003	0.0009	0.002	0.0023	0.0036	0.0049	0.0063	0.0068
	0.0003	0.0009	0.002	0.0023	0.0035	0.0049	0.0063	0.0068
	0.0003	0.0009	0.002	0.0023	0.0035	0.0049	0.0063	0.0068
	0.0002	0.0009	0.0019	0.0023	0.0035	0.0049	0.0063	0.0068
	0.0002	0.0009	0.0019	0.0023	0.0035	0.0049	0.0062	0.0067
	0.0002	0.0008	0.0019	0.0023	0.0035	0.0049	0.0062	0.0067
	0.0002	0.0008	0.0019	0.0023	0.0035	0.0048	0.0062	0.0067
	0.0002	0.0008	0.0019	0.0023	0.0035	0.0048	0.0062	0.0067
	0.0002	0.0008	0.0019	0.0023	0.0035	0.0048	0.0062	0.0067
	0.0002	0.0008	0.0019	0.0023	0.0035	0.0048	0.0062	0.0067
	0.0002	0.0008	0.0019	0.0022	0.0034	0.0048	0.0062	0.0067
	0.0002	0.0008	0.0018	0.0022	0.0034	0.0048	0.0062	0.0067
	0.0002	0.0008	0.0018	0.0022	0.0034	0.0048	0.0062	0.0067
		0.0007	0.0018	0.0022	0.0034	0.0048	0.0062	0.0067
		0.0007	0.0018	0.0022	0.0034	0.0048	0.0062	0.0067
		0.0007	0.0018	0.0022	0.0034	0.0048	0.0062	0.0067
		0.0007	0.0018	0.0022	0.0034	0.0047	0.0062	0.0066
		0.0006	0.0018	0.0022	0.0034	0.0047	0.0062	0.0066
		0.0006	0.0018	0.0022	0.0033	0.0047	0.0061	0.0066
		0.0006	0.0018	0.0022	0.0033	0.0047	0.0061	0.0066
		0.0006	0.0018	0.0022	0.0033	0.0047	0.0061	0.0066
		0.0006	0.0018	0.0021	0.0033	0.0047	0.0061	0.0066
		0.0006	0.0017	0.0021	0.0033	0.0047	0.0061	0.0066
		0.0005	0.0017	0.0021	0.0032	0.0047	0.0061	0.0065
		0.0005	0.0017	0.0021	0.0032	0.0047	0.0061	0.0065
		0.0005	0.0017	0.0021	0.0032	0.0047	0.0061	0.0065
		0.0005	0.0017	0.0021	0.0032	0.0047	0.0061	0.0065
		0.0005	0.0017	0.0021	0.0032	0.0047	0.0061	0.0065
		0.0005	0.0017	0.0021	0.0032	0.0047	0.0061	0.0065
		0.0004	0.0017	0.0021	0.0032	0.0047	0.0061	0.0065
		0.0004	0.0017	0.0021	0.0032	0.0046	0.0061	0.0065
		0.0004	0.0016	0.002	0.0032	0.0046	0.0061	0.0065
		0.0004	0.0016	0.002	0.0032	0.0046	0.006	0.0065
		0.0004	0.0016	0.002	0.0032	0.0046	0.006	0.0065
		0.0003	0.0016	0.002	0.0032	0.0046	0.006	0.0065
		0.0003	0.0016	0.002	0.0032	0.0046	0.006	0.0065
		0.0003	0.0016	0.002	0.0031	0.0046	0.006	0.0064
		0.0002	0.0016	0.002	0.0031	0.0046	0.006	0.0064
		0.0002	0.0016	0.002	0.0031	0.0046	0.006	0.0064
		0.0002	0.0016	0.002	0.0031	0.0046	0.006	0.0064
		0.0002	0.0015	0.002	0.0031	0.0046	0.006	0.0064
		0.0002	0.0015	0.002	0.0031	0.0045	0.0059	0.0064
		0.0002	0.0015	0.002	0.0031	0.0045	0.0059	0.0064
		0.0002	0.0015	0.002	0.0031	0.0045	0.0059	0.0064
		0.0002	0.0015	0.002	0.0031	0.0045	0.0059	0.0064
		0.0002	0.0015	0.002	0.0031	0.0045	0.0059	0.0063
		0.0002	0.0015	0.002	0.0031	0.0045	0.0059	0.0063
		0.0002	0.0015	0.002	0.003	0.0045	0.0059	0.0063
			0.0015	0.002	0.003	0.0045	0.0059	0.0063
			0.0015	0.002	0.003	0.0045	0.0059	0.0063
			0.0015	0.002	0.003	0.0045	0.0059	0.0063
			0.0015	0.0019	0.003	0.0045	0.0058	0.0063
			0.0015	0.0019	0.003	0.0045	0.0058	0.0063
			0.0015	0.0019	0.003	0.0045	0.0058	0.0063
			0.0015	0.0019	0.003	0.0045	0.0058	0.0062
			0.0015	0.0019	0.003	0.0045	0.0058	0.0062
			0.0014	0.0019	0.003	0.0045	0.0057	0.0062
			0.0014	0.0019	0.003	0.0044	0.0057	0.0062
			0.0014	0.0019	0.003	0.0044	0.0057	0.0062
			0.0014	0.0019	0.003	0.0044	0.0057	0.0062
			0.0014	0.0019	0.0029	0.0044	0.0057	0.0062
			0.0014	0.0018	0.0029	0.0044	0.0057	0.0062
			0.0014	0.0018	0.0029	0.0044	0.0056	0.0062
			0.0014	0.0018	0.0029	0.0044	0.0056	0.0061
			0.0014	0.0018	0.0029	0.0043	0.0056	0.0061
			0.0014	0.0018	0.0029	0.0043	0.0056	0.0061
			0.0013	0.0017	0.0029	0.0043	0.0056	0.0061
			0.0013	0.0017	0.0028	0.0043	0.0056	0.0061
			0.0013	0.0017	0.0028	0.0043	0.0056	0.0061
			0.0013	0.0017	0.0028	0.0043	0.0056	0.0061
			0.0013	0.0017	0.0028	0.0043	0.0056	0.0061
			0.0013	0.0017	0.0028	0.0043	0.0055	0.0061
			0.0013	0.0017	0.0028	0.0043	0.0055	0.0061
			0.0013	0.0017	0.0028	0.0043	0.0055	0.0061
			0.0013	0.0017	0.0028	0.0043	0.0055	0.0061
			0.0013	0.0017	0.0028	0.0043	0.0055	0.0061
			0.0013	0.0017	0.0028	0.0043	0.0055	0.006
			0.0012	0.0017	0.0028	0.0043	0.0055	0.006
			0.0012	0.0016	0.0028	0.0042	0.0055	0.006
			0.0012	0.0016	0.0028	0.0042	0.0055	0.006
			0.0012	0.0016	0.0028	0.0042	0.0055	0.006
			0.0012	0.0016	0.0028	0.0042	0.0055	0.006
			0.0012	0.0016	0.0028	0.0042	0.0055	0.006
			0.0012	0.0016	0.0028	0.0042	0.0054	0.006
			0.0012	0.0016	0.0028	0.0042	0.0054	0.006
			0.0012	0.0016	0.0028	0.0042	0.0054	0.006
			0.0012	0.0016	0.0027	0.0042	0.0054	0.006
			0.0011	0.0016	0.0027	0.0042	0.0054	0.006
			0.0011	0.0016	0.0027	0.0041	0.0054	0.006
			0.0011	0.0016	0.0027	0.0041	0.0054	0.006
			0.0011	0.0016	0.0027	0.0041	0.0054	0.006
			0.0011	0.0016	0.0027	0.0041	0.0054	0.006
			0.0011	0.0015	0.0027	0.0041	0.0054	0.0059
			0.0011	0.0015	0.0027	0.0041	0.0054	0.0059
			0.0011	0.0015	0.0027	0.0041	0.0054	0.0059
			0.0011	0.0015	0.0027	0.0041	0.0053	0.0059
			0.0011	0.0015	0.0027	0.0041	0.0053	0.0059
			0.0011	0.0015	0.0027	0.0041	0.0053	0.0059
			0.001	0.0015	0.0027	0.0041	0.0053	0.0059
			0.001	0.0015	0.0027	0.004	0.0053	0.0059
			0.001	0.0015	0.0026	0.004	0.0053	0.0059
			0.001	0.0015	0.0026	0.004	0.0053	0.0059
			0.001	0.0015	0.0026	0.004	0.0053	0.0059
			0.001	0.0015	0.0026	0.004	0.0053	0.0059
			0.001	0.0015	0.0026	0.004	0.0052	0.0058
			0.001	0.0015	0.0026	0.004	0.0052	0.0058
			0.001	0.0014	0.0026	0.004	0.0052	0.0058
			0.001	0.0014	0.0026	0.0039	0.0052	0.0058
			0.0009	0.0014	0.0026	0.0039	0.0052	0.0058
			0.0009	0.0014	0.0026	0.0039	0.0052	0.0058
			0.0009	0.0014	0.0026	0.0039	0.0052	0.0057
			0.0009	0.0014	0.0026	0.0039	0.0052	0.0057
			0.0009	0.0014	0.0026	0.0039	0.0052	0.0057
			0.0008	0.0014	0.0026	0.0039	0.0051	0.0057
			0.0008	0.0014	0.0026	0.0039	0.0051	0.0057
			0.0008	0.0014	0.0026	0.0039	0.0051	0.0056
			0.0008	0.0014	0.0026	0.0039	0.0051	0.0056
			0.0008	0.0013	0.0026	0.0039	0.0051	0.0056
			0.0008	0.0013	0.0026	0.0039	0.0051	0.0056
			0.0008	0.0013	0.0026	0.0039	0.0051	0.0056
			0.0008	0.0013	0.0026	0.0039	0.0051	0.0056
			0.0008	0.0013	0.0025	0.0039	0.0051	0.0056
			0.0008	0.0013	0.0025	0.0038	0.0051	0.0056
			0.0008	0.0013	0.0025	0.0038	0.0051	0.0056
			0.0008	0.0013	0.0025	0.0038	0.0051	0.0056
			0.0007	0.0013	0.0025	0.0038	0.0051	0.0056
			0.0007	0.0012	0.0025	0.0038	0.0051	0.0056
			0.0007	0.0012	0.0025	0.0038	0.0051	0.0056
			0.0007	0.0012	0.0025	0.0038	0.005	0.0056
			0.0007	0.0012	0.0025	0.0038	0.005	0.0055
			0.0007	0.0012	0.0025	0.0038	0.005	0.0055
			0.0007	0.0012	0.0025	0.0038	0.005	0.0055
			0.0007	0.0012	0.0025	0.0038	0.005	0.0055
			0.0007	0.0012	0.0025	0.0038	0.005	0.0055
			0.0007	0.0012	0.0025	0.0038	0.005	0.0055
			0.0007	0.0012	0.0025	0.0037	0.005	0.0055
			0.0007	0.0012	0.0025	0.0037	0.005	0.0055
			0.0007	0.0012	0.0025	0.0037	0.005	0.0055
			0.0007	0.0012	0.0024	0.0037	0.0049	0.0055
			0.0007	0.0011	0.0024	0.0037	0.0049	0.0055
			0.0007	0.0011	0.0024	0.0037	0.0049	0.0054
			0.0007	0.0011	0.0024	0.0037	0.0049	0.0054
			0.0006	0.0011	0.0024	0.0037	0.0049	0.0054
			0.0006	0.0011	0.0024	0.0037	0.0049	0.0054
			0.0006	0.0011	0.0024	0.0037	0.0049	0.0054
			0.0006	0.0011	0.0024	0.0037	0.0049	0.0054
			0.0006	0.0011	0.0024	0.0036	0.0049	0.0054
			0.0006	0.0011	0.0024	0.0036	0.0049	0.0054
			0.0006	0.0011	0.0024	0.0036	0.0048	0.0054
			0.0006	0.0011	0.0024	0.0036	0.0048	0.0054
			0.0006	0.001	0.0024	0.0036	0.0048	0.0054
			0.0006	0.001	0.0024	0.0036	0.0048	0.0054
			0.0006	0.001	0.0023	0.0036	0.0048	0.0054
			0.0005	0.001	0.0023	0.0036	0.0048	0.0053
			0.0005	0.001	0.0023	0.0036	0.0048	0.0053
			0.0005	0.001	0.0023	0.0036	0.0048	0.0053
			0.0005	0.001	0.0023	0.0036	0.0048	0.0053
			0.0005	0.001	0.0023	0.0036	0.0048	0.0053
			0.0005	0.001	0.0023	0.0036	0.0048	0.0053
			0.0005	0.0009	0.0023	0.0036	0.0048	0.0053
			0.0004	0.0009	0.0023	0.0036	0.0048	0.0053
			0.0004	0.0009	0.0023	0.0036	0.0048	0.0053
			0.0004	0.0009	0.0023	0.0036	0.0047	0.0053
			0.0004	0.0009	0.0022	0.0036	0.0047	0.0053
			0.0004	0.0009	0.0022	0.0036	0.0047	0.0053
			0.0004	0.0009	0.0022	0.0036	0.0047	0.0053
			0.0004	0.0009	0.0022	0.0036	0.0047	0.0053
			0.0004	0.0009	0.0022	0.0035	0.0047	0.0053
			0.0004	0.0009	0.0022	0.0035	0.0047	0.0052
			0.0004	0.0009	0.0022	0.0035	0.0046	0.0052
			0.0004	0.0009	0.0022	0.0035	0.0046	0.0052
			0.0004	0.0008	0.0022	0.0035	0.0046	0.0052
			0.0003	0.0008	0.0022	0.0035	0.0046	0.0052
			0.0003	0.0008	0.0022	0.0035	0.0046	0.0052
			0.0003	0.0008	0.0022	0.0035	0.0046	0.0052
			0.0003	0.0008	0.0022	0.0035	0.0046	0.0052
			0.0003	0.0008	0.0022	0.0035	0.0046	0.0052
			0.0003	0.0007	0.0022	0.0035	0.0046	0.0052
			0.0003	0.0007	0.0022	0.0035	0.0046	0.0052
			0.0003	0.0007	0.0021	0.0034	0.0045	0.0052
			0.0003	0.0007	0.0021	0.0034	0.0045	0.0052
			0.0003	0.0007	0.0021	0.0034	0.0045	0.0051
			0.0003	0.0007	0.0021	0.0034	0.0045	0.0051
			0.0002	0.0007	0.0021	0.0034	0.0045	0.0051
			0.0002	0.0007	0.0021	0.0034	0.0045	0.0051
			0.0002	0.0007	0.0021	0.0034	0.0045	0.0051
			0.0002	0.0007	0.0021	0.0034	0.0045	0.0051
			0.0002	0.0007	0.0021	0.0034	0.0045	0.0051
			0.0002	0.0007	0.0021	0.0034	0.0045	0.0051
			0.0002	0.0007	0.0021	0.0034	0.0045	0.0051
			0.0002	0.0006	0.0021	0.0034	0.0045	0.0051
			0.0002	0.0006	0.0021	0.0033	0.0045	0.0051
			0.0002	0.0006	0.0021	0.0033	0.0045	0.0051
			0.0002	0.0006	0.0021	0.0033	0.0045	0.0051
				0.0006	0.0021	0.0033	0.0045	0.0051
				0.0006	0.0021	0.0033	0.0045	0.0051
				0.0006	0.002	0.0033	0.0045	0.0051
				0.0006	0.002	0.0033	0.0044	0.005
				0.0006	0.002	0.0033	0.0044	0.005
				0.0006	0.002	0.0033	0.0044	0.005
				0.0006	0.002	0.0033	0.0044	0.005
				0.0006	0.002	0.0033	0.0044	0.005
				0.0006	0.002	0.0033	0.0044	0.005
				0.0006	0.002	0.0033	0.0044	0.005
				0.0006	0.002	0.0033	0.0044	0.005
				0.0005	0.002	0.0033	0.0044	0.005
				0.0005	0.002	0.0033	0.0044	0.005
				0.0005	0.002	0.0033	0.0044	0.005
				0.0005	0.0019	0.0032	0.0044	0.005
				0.0005	0.0019	0.0032	0.0044	0.0049
				0.0005	0.0019	0.0032	0.0044	0.0049
				0.0005	0.0019	0.0032	0.0044	0.0049
				0.0005	0.0019	0.0032	0.0044	0.0049
				0.0005	0.0019	0.0032	0.0043	0.0049
				0.0005	0.0019	0.0032	0.0043	0.0049
				0.0004	0.0019	0.0032	0.0043	0.0049
				0.0004	0.0019	0.0032	0.0043	0.0049
				0.0004	0.0019	0.0032	0.0043	0.0049
				0.0004	0.0019	0.0032	0.0043	0.0049
				0.0004	0.0019	0.0031	0.0043	0.0048
				0.0004	0.0019	0.0031	0.0043	0.0048
				0.0004	0.0019	0.0031	0.0043	0.0048
				0.0004	0.0018	0.0031	0.0043	0.0048
				0.0004	0.0018	0.0031	0.0043	0.0048
				0.0004	0.0018	0.0031	0.0042	0.0048
				0.0004	0.0018	0.0031	0.0042	0.0048
				0.0004	0.0018	0.0031	0.0042	0.0048
				0.0004	0.0018	0.0031	0.0042	0.0048
				0.0003	0.0018	0.0031	0.0042	0.0048
				0.0003	0.0018	0.0031	0.0042	0.0047
				0.0003	0.0018	0.0031	0.0042	0.0047
				0.0003	0.0018	0.003	0.0042	0.0047
				0.0003	0.0018	0.003	0.0042	0.0047
				0.0003	0.0018	0.003	0.0042	0.0047
				0.0003	0.0018	0.003	0.0042	0.0047
				0.0003	0.0018	0.003	0.0041	0.0047
				0.0003	0.0017	0.003	0.0041	0.0047
				0.0003	0.0017	0.003	0.0041	0.0047
				0.0003	0.0017	0.003	0.0041	0.0047
				0.0003	0.0017	0.003	0.0041	0.0047
				0.0003	0.0017	0.003	0.0041	0.0047
				0.0003	0.0017	0.003	0.0041	0.0047
				0.0003	0.0017	0.003	0.0041	0.0047
				0.0003	0.0017	0.003	0.0041	0.0047
				0.0002	0.0017	0.0029	0.0041	0.0047
				0.0002	0.0017	0.0029	0.0041	0.0046
				0.0002	0.0017	0.0029	0.0041	0.0046
				0.0002	0.0017	0.0029	0.0041	0.0046
				0.0002	0.0017	0.0029	0.0041	0.0046
				0.0002	0.0017	0.0029	0.0041	0.0046
				0.0002	0.0017	0.0029	0.0041	0.0046
				0.0002	0.0017	0.0029	0.0041	0.0046
				0.0002	0.0017	0.0029	0.004	0.0046
				0.0002	0.0017	0.0029	0.004	0.0046
				0.0002	0.0016	0.0029	0.004	0.0046
				0.0002	0.0016	0.0029	0.004	0.0046
				0.0002	0.0016	0.0029	0.004	0.0046
				0.0002	0.0016	0.0029	0.004	0.0046
				0.0002	0.0016	0.0029	0.004	0.0046
				0.0002	0.0016	0.0029	0.004	0.0045
				0.0002	0.0016	0.0029	0.004	0.0045
				0.0002	0.0016	0.0028	0.004	0.0045
				0.0002	0.0016	0.0028	0.004	0.0045
				0.0002	0.0016	0.0028	0.004	0.0045
				0.0002	0.0016	0.0028	0.004	0.0045
				0.0002	0.0016	0.0028	0.004	0.0045
				0.0002	0.0015	0.0028	0.004	0.0045
				0.0002	0.0015	0.0028	0.004	0.0045
				0.0002	0.0015	0.0028	0.0039	0.0045
				0.0002	0.0015	0.0028	0.0039	0.0045
				0.0002	0.0015	0.0028	0.0039	0.0045
					0.0015	0.0028	0.0039	0.0045
					0.0015	0.0028	0.0039	0.0044
					0.0015	0.0028	0.0039	0.0044
					0.0015	0.0028	0.0039	0.0044
					0.0015	0.0027	0.0039	0.0044
					0.0015	0.0027	0.0039	0.0044
					0.0015	0.0027	0.0039	0.0044
					0.0015	0.0027	0.0039	0.0044
					0.0015	0.0027	0.0039	0.0044
					0.0014	0.0027	0.0038	0.0044
					0.0014	0.0027	0.0038	0.0044
					0.0014	0.0027	0.0038	0.0044
					0.0014	0.0027	0.0038	0.0044
					0.0014	0.0027	0.0038	0.0044
					0.0014	0.0027	0.0038	0.0044
					0.0014	0.0027	0.0038	0.0043
					0.0014	0.0027	0.0038	0.0043
					0.0014	0.0027	0.0038	0.0043
					0.0014	0.0026	0.0038	0.0043
					0.0014	0.0026	0.0038	0.0043
					0.0014	0.0026	0.0038	0.0043
					0.0014	0.0026	0.0037	0.0043
					0.0014	0.0026	0.0037	0.0043
					0.0014	0.0026	0.0037	0.0043
					0.0014	0.0026	0.0037	0.0043
					0.0014	0.0026	0.0037	0.0043
					0.0014	0.0026	0.0037	0.0043
					0.0014	0.0026	0.0037	0.0043
					0.0014	0.0026	0.0037	0.0043
					0.0014	0.0026	0.0037	0.0043
					0.0014	0.0026	0.0037	0.0043
					0.0014	0.0026	0.0037	0.0043
					0.0014	0.0026	0.0036	0.0042
					0.0014	0.0026	0.0036	0.0042
					0.0014	0.0025	0.0036	0.0042
					0.0013	0.0025	0.0036	0.0042
					0.0013	0.0025	0.0036	0.0042
					0.0013	0.0025	0.0036	0.0042
					0.0013	0.0025	0.0036	0.0042
					0.0013	0.0025	0.0036	0.0042
					0.0013	0.0025	0.0036	0.0042
					0.0013	0.0025	0.0036	0.0042
					0.0013	0.0025	0.0036	0.0042
					0.0013	0.0025	0.0036	0.0042
					0.0013	0.0024	0.0036	0.0042
					0.0013	0.0024	0.0036	0.0042
					0.0013	0.0024	0.0036	0.0042
					0.0013	0.0024	0.0036	0.0042
					0.0013	0.0024	0.0036	0.0041
					0.0013	0.0024	0.0036	0.0041
					0.0013	0.0024	0.0036	0.0041
					0.0013	0.0024	0.0036	0.0041
					0.0013	0.0024	0.0035	0.0041
					0.0013	0.0024	0.0035	0.0041
					0.0013	0.0024	0.0035	0.0041
					0.0013	0.0024	0.0035	0.0041
					0.0013	0.0024	0.0035	0.0041
					0.0013	0.0023	0.0035	0.0041
					0.0013	0.0023	0.0035	0.0041
					0.0012	0.0023	0.0035	0.0041
					0.0012	0.0023	0.0035	0.0041
					0.0012	0.0023	0.0035	0.0041
					0.0012	0.0023	0.0035	0.0041
					0.0012	0.0023	0.0035	0.004
					0.0012	0.0023	0.0035	0.004
					0.0012	0.0023	0.0035	0.004
					0.0012	0.0023	0.0035	0.004
					0.0012	0.0023	0.0034	0.004
					0.0012	0.0023	0.0034	0.004
					0.0012	0.0023	0.0034	0.004
					0.0012	0.0023	0.0034	0.004
					0.0012	0.0023	0.0034	0.004
					0.0012	0.0023	0.0034	0.004
					0.0012	0.0023	0.0034	0.004
					0.0011	0.0023	0.0034	0.004
					0.0011	0.0023	0.0034	0.004
					0.0011	0.0022	0.0034	0.004
					0.0011	0.0022	0.0034	0.004
					0.0011	0.0022	0.0034	0.004
					0.0011	0.0022	0.0034	0.0039
					0.0011	0.0022	0.0034	0.0039
					0.0011	0.0022	0.0033	0.0039
					0.0011	0.0022	0.0033	0.0039
					0.0011	0.0022	0.0033	0.0039
					0.0011	0.0022	0.0033	0.0039
					0.0011	0.0022	0.0033	0.0039
					0.0011	0.0022	0.0033	0.0039
					0.0011	0.0022	0.0033	0.0039
					0.0011	0.0022	0.0033	0.0039
					0.0011	0.0022	0.0033	0.0039
					0.0011	0.0022	0.0033	0.0039
					0.0011	0.0022	0.0033	0.0039
					0.0011	0.0022	0.0033	0.0039
					0.0011	0.0022	0.0033	0.0039
					0.0011	0.0022	0.0033	0.0039
					0.001	0.0022	0.0033	0.0039
					0.001	0.0021	0.0033	0.0039
					0.001	0.0021	0.0033	0.0039
					0.001	0.0021	0.0032	0.0038
					0.001	0.0021	0.0032	0.0038
					0.001	0.0021	0.0032	0.0038
					0.001	0.0021	0.0032	0.0038
					0.001	0.0021	0.0032	0.0038
					0.001	0.0021	0.0032	0.0038
					0.001	0.0021	0.0032	0.0038
					0.001	0.0021	0.0032	0.0038
					0.001	0.0021	0.0032	0.0038
					0.001	0.0021	0.0032	0.0038
					0.001	0.0021	0.0032	0.0038
					0.001	0.0021	0.0032	0.0038
					0.001	0.0021	0.0032	0.0038
					0.001	0.0021	0.0032	0.0038
					0.0009	0.0021	0.0032	0.0038
					0.0009	0.002	0.0032	0.0038
					0.0009	0.002	0.0032	0.0038
					0.0009	0.002	0.0032	0.0038
					0.0009	0.002	0.0032	0.0038
					0.0009	0.002	0.0032	0.0037
					0.0009	0.002	0.0031	0.0037
					0.0009	0.002	0.0031	0.0037
					0.0009	0.002	0.0031	0.0037
					0.0009	0.002	0.0031	0.0037
					0.0009	0.002	0.0031	0.0037
					0.0009	0.002	0.0031	0.0037
					0.0008	0.002	0.0031	0.0037
					0.0008	0.002	0.0031	0.0037
					0.0008	0.002	0.0031	0.0037
					0.0008	0.002	0.0031	0.0037
					0.0008	0.002	0.0031	0.0037
					0.0008	0.002	0.0031	0.0037
					0.0008	0.002	0.0031	0.0037
					0.0008	0.002	0.0031	0.0037
					0.0008	0.002	0.0031	0.0037
					0.0007	0.0019	0.0031	0.0037
					0.0007	0.0019	0.0031	0.0037
					0.0007	0.0019	0.0031	0.0037
					0.0007	0.0019	0.003	0.0037
					0.0007	0.0019	0.003	0.0037
					0.0007	0.0019	0.003	0.0037
					0.0007	0.0019	0.003	0.0037
					0.0007	0.0019	0.003	0.0037
					0.0007	0.0019	0.003	0.0037
					0.0007	0.0019	0.003	0.0037
					0.0007	0.0019	0.003	0.0036
					0.0007	0.0019	0.003	0.0036
					0.0007	0.0019	0.003	0.0036
					0.0007	0.0019	0.003	0.0036
					0.0007	0.0019	0.003	0.0036
					0.0007	0.0019	0.0029	0.0036
					0.0006	0.0019	0.0029	0.0036
					0.0006	0.0019	0.0029	0.0036
					0.0006	0.0019	0.0029	0.0036
					0.0006	0.0019	0.0029	0.0036
					0.0006	0.0019	0.0029	0.0036
					0.0006	0.0019	0.0029	0.0036
					0.0006	0.0019	0.0029	0.0036
					0.0006	0.0019	0.0029	0.0036
					0.0006	0.0019	0.0029	0.0036
					0.0006	0.0018	0.0029	0.0036
					0.0006	0.0018	0.0029	0.0036
					0.0006	0.0018	0.0029	0.0036
					0.0006	0.0018	0.0029	0.0036
					0.0006	0.0018	0.0029	0.0036
					0.0005	0.0018	0.0029	0.0036
					0.0005	0.0018	0.0029	0.0036
					0.0005	0.0018	0.0029	0.0036
					0.0005	0.0018	0.0029	0.0035
					0.0005	0.0018	0.0029	0.0035
					0.0005	0.0018	0.0029	0.0035
					0.0005	0.0018	0.0028	0.0035
					0.0005	0.0018	0.0028	0.0035
					0.0005	0.0018	0.0028	0.0035
					0.0005	0.0018	0.0028	0.0035
					0.0005	0.0018	0.0028	0.0035
					0.0005	0.0018	0.0028	0.0035
					0.0004	0.0018	0.0028	0.0035
					0.0004	0.0018	0.0028	0.0035
					0.0004	0.0018	0.0028	0.0035
					0.0004	0.0018	0.0028	0.0035
					0.0004	0.0018	0.0028	0.0035
					0.0004	0.0017	0.0028	0.0035
					0.0004	0.0017	0.0028	0.0035
					0.0004	0.0017	0.0028	0.0035
					0.0004	0.0017	0.0028	0.0035
					0.0003	0.0017	0.0028	0.0035
					0.0003	0.0017	0.0028	0.0035
					0.0003	0.0017	0.0028	0.0035
					0.0003	0.0017	0.0028	0.0035
					0.0003	0.0017	0.0028	0.0035
					0.0003	0.0017	0.0028	0.0035
					0.0003	0.0017	0.0028	0.0034
					0.0003	0.0017	0.0028	0.0034
					0.0003	0.0017	0.0028	0.0034
					0.0003	0.0017	0.0028	0.0034
					0.0003	0.0017	0.0027	0.0034
					0.0003	0.0017	0.0027	0.0034
					0.0003	0.0017	0.0027	0.0034
					0.0003	0.0017	0.0027	0.0034
					0.0002	0.0017	0.0027	0.0034
					0.0002	0.0017	0.0027	0.0034
					0.0002	0.0016	0.0027	0.0034
					0.0002	0.0016	0.0027	0.0034
					0.0002	0.0016	0.0027	0.0034
					0.0002	0.0016	0.0027	0.0034
					0.0002	0.0016	0.0027	0.0033
					0.0002	0.0016	0.0027	0.0033
					0.0002	0.0016	0.0027	0.0033
						0.0016	0.0027	0.0033
						0.0016	0.0027	0.0033
						0.0016	0.0027	0.0033
						0.0016	0.0027	0.0033
						0.0016	0.0027	0.0033
						0.0016	0.0027	0.0033
						0.0016	0.0027	0.0033
						0.0016	0.0027	0.0033
						0.0016	0.0027	0.0033
						0.0015	0.0027	0.0033
						0.0015	0.0027	0.0033
						0.0015	0.0026	0.0033
						0.0015	0.0026	0.0032
						0.0015	0.0026	0.0032
						0.0015	0.0026	0.0032
						0.0015	0.0026	0.0032
						0.0015	0.0026	0.0032
						0.0015	0.0026	0.0032
						0.0015	0.0026	0.0032
						0.0015	0.0026	0.0032
						0.0015	0.0026	0.0032
						0.0015	0.0026	0.0032
						0.0015	0.0026	0.0032
						0.0015	0.0026	0.0032
						0.0014	0.0026	0.0032
						0.0014	0.0025	0.0032
						0.0014	0.0025	0.0032
						0.0014	0.0025	0.0032
						0.0014	0.0025	0.0032
						0.0014	0.0025	0.0032
						0.0014	0.0025	0.0032
						0.0014	0.0025	0.0032
						0.0014	0.0025	0.0032
						0.0014	0.0025	0.0032
						0.0014	0.0025	0.0032
						0.0014	0.0025	0.0032
						0.0014	0.0025	0.0032
						0.0014	0.0025	0.0032
						0.0014	0.0025	0.0032
						0.0014	0.0025	0.0031
						0.0014	0.0024	0.0031
						0.0014	0.0024	0.0031
						0.0014	0.0024	0.0031
						0.0014	0.0024	0.0031
						0.0014	0.0024	0.0031
						0.0013	0.0024	0.0031
						0.0013	0.0024	0.0031
						0.0013	0.0024	0.0031
						0.0013	0.0024	0.0031
						0.0013	0.0024	0.0031
						0.0013	0.0024	0.0031
						0.0013	0.0024	0.0031
						0.0013	0.0024	0.0031
						0.0013	0.0024	0.0031
						0.0013	0.0024	0.0031
						0.0013	0.0024	0.0031
						0.0013	0.0024	0.0031
						0.0013	0.0023	0.0031
						0.0013	0.0023	0.0031
						0.0013	0.0023	0.0031
						0.0013	0.0023	0.0031
						0.0013	0.0023	0.0031
						0.0013	0.0023	0.0031
						0.0013	0.0023	0.0031
						0.0013	0.0023	0.0031
						0.0013	0.0023	0.0031
						0.0013	0.0023	0.0031
						0.0012	0.0023	0.0031
						0.0012	0.0023	0.0031
						0.0012	0.0023	0.0031
						0.0012	0.0023	0.003
						0.0012	0.0023	0.003
						0.0012	0.0023	0.003
						0.0012	0.0023	0.003
						0.0012	0.0022	0.003
						0.0012	0.0022	0.003
						0.0012	0.0022	0.003
						0.0012	0.0022	0.003
						0.0012	0.0022	0.003
						0.0011	0.0022	0.003
						0.0011	0.0022	0.003
						0.0011	0.0022	0.003
						0.0011	0.0022	0.003
						0.0011	0.0022	0.003
						0.0011	0.0022	0.003
						0.0011	0.0021	0.003
						0.0011	0.0021	0.003
						0.0011	0.0021	0.003
						0.0011	0.0021	0.003
						0.0011	0.0021	0.003
						0.0011	0.0021	0.003
						0.0011	0.0021	0.003
						0.0011	0.0021	0.003
						0.001	0.0021	0.003
						0.001	0.0021	0.003
						0.001	0.0021	0.0029
						0.001	0.0021	0.0029
						0.001	0.0021	0.0029
						0.001	0.0021	0.0029
						0.001	0.0021	0.0029
						0.001	0.0021	0.0029
						0.001	0.0021	0.0029
						0.001	0.002	0.0029
						0.001	0.002	0.0029
						0.001	0.002	0.0029
						0.001	0.002	0.0029
						0.001	0.002	0.0029
						0.001	0.002	0.0029
						0.001	0.002	0.0029
						0.001	0.002	0.0029
						0.001	0.002	0.0029
						0.001	0.002	0.0029
						0.001	0.002	0.0029
						0.001	0.002	0.0029
						0.001	0.002	0.0029
						0.001	0.002	0.0029
						0.0009	0.002	0.0029
						0.0009	0.002	0.0028
						0.0009	0.002	0.0028
						0.0009	0.002	0.0028
						0.0009	0.002	0.0028
						0.0009	0.002	0.0028
						0.0009	0.002	0.0028
						0.0009	0.002	0.0028
						0.0009	0.0019	0.0028
						0.0009	0.0019	0.0028
						0.0009	0.0019	0.0028
						0.0009	0.0019	0.0028
						0.0009	0.0019	0.0028
						0.0009	0.0019	0.0028
						0.0009	0.0019	0.0028
						0.0009	0.0019	0.0028
						0.0009	0.0019	0.0028
						0.0008	0.0019	0.0028
						0.0008	0.0019	0.0028
						0.0008	0.0019	0.0028
						0.0008	0.0019	0.0028
						0.0008	0.0019	0.0028
						0.0008	0.0019	0.0028
						0.0008	0.0019	0.0028
						0.0008	0.0019	0.0028
						0.0008	0.0019	0.0028
						0.0008	0.0019	0.0028
						0.0008	0.0019	0.0028
						0.0008	0.0019	0.0028
						0.0008	0.0019	0.0028
						0.0008	0.0019	0.0028
						0.0008	0.0019	0.0027
						0.0008	0.0018	0.0027
						0.0008	0.0018	0.0027
						0.0007	0.0018	0.0027
						0.0007	0.0018	0.0027
						0.0007	0.0018	0.0027
						0.0007	0.0018	0.0027
						0.0007	0.0018	0.0027
						0.0007	0.0018	0.0027
						0.0007	0.0018	0.0027
						0.0007	0.0018	0.0027
						0.0007	0.0018	0.0027
						0.0007	0.0018	0.0027
						0.0007	0.0018	0.0027
						0.0007	0.0018	0.0027
						0.0007	0.0018	0.0027
						0.0006	0.0018	0.0027
						0.0006	0.0018	0.0027
						0.0006	0.0018	0.0027
						0.0006	0.0018	0.0027
						0.0006	0.0018	0.0027
						0.0006	0.0017	0.0027
						0.0006	0.0017	0.0027
						0.0006	0.0017	0.0026
						0.0006	0.0017	0.0026
						0.0006	0.0017	0.0026
						0.0006	0.0017	0.0026
						0.0006	0.0017	0.0026
						0.0006	0.0017	0.0026
						0.0006	0.0017	0.0026
						0.0006	0.0017	0.0026
						0.0006	0.0017	0.0026
						0.0005	0.0017	0.0026
						0.0005	0.0017	0.0026
						0.0005	0.0017	0.0026
						0.0005	0.0017	0.0026
						0.0005	0.0017	0.0026
						0.0005	0.0017	0.0026
						0.0005	0.0017	0.0026
						0.0005	0.0017	0.0026
						0.0005	0.0017	0.0026
						0.0005	0.0017	0.0026
						0.0005	0.0017	0.0026
						0.0005	0.0017	0.0026
						0.0004	0.0017	0.0026
						0.0004	0.0017	0.0026
						0.0004	0.0016	0.0026
						0.0004	0.0016	0.0026
						0.0004	0.0016	0.0025
						0.0004	0.0016	0.0025
						0.0004	0.0016	0.0025
						0.0004	0.0016	0.0025
						0.0004	0.0016	0.0025
						0.0004	0.0016	0.0025
						0.0004	0.0016	0.0025
						0.0004	0.0016	0.0025
						0.0004	0.0016	0.0025
						0.0003	0.0016	0.0025
						0.0003	0.0016	0.0025
						0.0003	0.0016	0.0025
						0.0003	0.0016	0.0025
						0.0003	0.0016	0.0025
						0.0003	0.0016	0.0025
						0.0003	0.0016	0.0025
						0.0003	0.0015	0.0025
						0.0003	0.0015	0.0025
						0.0003	0.0015	0.0025
						0.0003	0.0015	0.0025
						0.0003	0.0015	0.0025
						0.0003	0.0015	0.0025
						0.0003	0.0015	0.0025
						0.0003	0.0015	0.0025
						0.0003	0.0015	0.0025
						0.0003	0.0015	0.0025
						0.0003	0.0015	0.0025
						0.0003	0.0015	0.0024
						0.0003	0.0015	0.0024
						0.0003	0.0015	0.0024
						0.0002	0.0015	0.0024
						0.0002	0.0015	0.0024
						0.0002	0.0014	0.0024
						0.0002	0.0014	0.0024
						0.0002	0.0014	0.0024
						0.0002	0.0014	0.0024
						0.0002	0.0014	0.0024
						0.0002	0.0014	0.0024
						0.0002	0.0014	0.0024
						0.0002	0.0014	0.0024
						0.0002	0.0014	0.0024
						0.0002	0.0014	0.0024
						0.0002	0.0014	0.0024
						0.0002	0.0014	0.0024
							0.0014	0.0024
							0.0014	0.0024
							0.0014	0.0024
							0.0014	0.0024
							0.0014	0.0024
							0.0014	0.0024
							0.0014	0.0024
							0.0013	0.0024
							0.0013	0.0024
							0.0013	0.0024
							0.0013	0.0024
							0.0013	0.0024
							0.0013	0.0024
							0.0013	0.0024
							0.0013	0.0023
							0.0013	0.0023
							0.0013	0.0023
							0.0013	0.0023
							0.0013	0.0023
							0.0013	0.0023
							0.0013	0.0023
							0.0013	0.0023
							0.0013	0.0023
							0.0013	0.0023
							0.0013	0.0023
							0.0013	0.0023
							0.0013	0.0023
							0.0012	0.0023
							0.0012	0.0023
							0.0012	0.0023
							0.0012	0.0023
							0.0012	0.0023
							0.0012	0.0023
							0.0012	0.0023
							0.0012	0.0023
							0.0012	0.0023
							0.0012	0.0023
							0.0012	0.0023
							0.0012	0.0023
							0.0012	0.0023
							0.0012	0.0023
							0.0012	0.0023
							0.0012	0.0023
							0.0012	0.0023
							0.0012	0.0023
							0.0012	0.0023
							0.0012	0.0022
							0.0012	0.0022
							0.0012	0.0022
							0.0011	0.0022
							0.0011	0.0022
							0.0011	0.0022
							0.0011	0.0022
							0.0011	0.0022
							0.0011	0.0022
							0.0011	0.0022
							0.0011	0.0022
							0.0011	0.0022
							0.0011	0.0022
							0.0011	0.0022
							0.0011	0.0022
							0.0011	0.0022
							0.0011	0.0022
							0.0011	0.0022
							0.0011	0.0022
							0.0011	0.0022
							0.0011	0.0022
							0.0011	0.0022
							0.0011	0.0022
							0.0011	0.0021
							0.0011	0.0021
							0.0011	0.0021
							0.0011	0.0021
							0.001	0.0021
							0.001	0.0021
							0.001	0.0021
							0.001	0.0021
							0.001	0.0021
							0.001	0.0021
							0.001	0.0021
							0.001	0.0021
							0.001	0.0021
							0.001	0.0021
							0.001	0.0021
							0.001	0.0021
							0.001	0.0021
							0.001	0.0021
							0.001	0.0021
							0.001	0.0021
							0.001	0.0021
							0.001	0.0021
							0.0009	0.0021
							0.0009	0.0021
							0.0009	0.0021
							0.0009	0.0021
							0.0009	0.0021
							0.0009	0.0021
							0.0009	0.002
							0.0009	0.002
							0.0009	0.002
							0.0009	0.002
							0.0009	0.002
							0.0009	0.002
							0.0009	0.002
							0.0009	0.002
							0.0009	0.002
							0.0009	0.002
							0.0009	0.002
							0.0009	0.002
							0.0009	0.002
							0.0009	0.002
							0.0008	0.0019
							0.0008	0.0019
							0.0008	0.0019
							0.0008	0.0019
							0.0008	0.0019
							0.0008	0.0019
							0.0008	0.0019
							0.0008	0.0019
							0.0008	0.0019
							0.0008	0.0019
							0.0008	0.0019
							0.0008	0.0019
							0.0008	0.0019
							0.0008	0.0019
							0.0008	0.0019
							0.0008	0.0019
							0.0008	0.0019
							0.0008	0.0019
							0.0008	0.0019
							0.0008	0.0019
							0.0008	0.0019
							0.0008	0.0019
							0.0007	0.0019
							0.0007	0.0019
							0.0007	0.0019
							0.0007	0.0019
							0.0007	0.0019
							0.0007	0.0019
							0.0007	0.0019
							0.0007	0.0019
							0.0007	0.0019
							0.0007	0.0019
							0.0007	0.0019
							0.0007	0.0019
							0.0007	0.0019
							0.0007	0.0018
							0.0007	0.0018
							0.0007	0.0018
							0.0007	0.0018
							0.0007	0.0018
							0.0006	0.0018
							0.0006	0.0018
							0.0006	0.0018
							0.0006	0.0018
							0.0006	0.0018
							0.0006	0.0018
							0.0006	0.0018
							0.0006	0.0018
							0.0006	0.0018
							0.0006	0.0018
							0.0006	0.0018
							0.0006	0.0018
							0.0006	0.0018
							0.0006	0.0018
							0.0005	0.0018
							0.0005	0.0018
							0.0005	0.0018
							0.0005	0.0018
							0.0005	0.0018
							0.0005	0.0018
							0.0005	0.0018
							0.0005	0.0018
							0.0005	0.0018
							0.0005	0.0018
							0.0005	0.0017
							0.0005	0.0017
							0.0005	0.0017
							0.0005	0.0017
							0.0004	0.0017
							0.0004	0.0017
							0.0004	0.0017
							0.0004	0.0017
							0.0004	0.0017
							0.0004	0.0017
							0.0004	0.0017
							0.0004	0.0017
							0.0004	0.0017
							0.0004	0.0017
							0.0004	0.0017
							0.0004	0.0017
							0.0004	0.0017
							0.0004	0.0017
							0.0004	0.0017
							0.0004	0.0017
							0.0004	0.0017
							0.0004	0.0017
							0.0004	0.0017
							0.0004	0.0017
							0.0003	0.0017
							0.0003	0.0017
							0.0003	0.0017
							0.0003	0.0017
							0.0003	0.0017
							0.0003	0.0017
							0.0003	0.0017
							0.0003	0.0017
							0.0003	0.0017
							0.0003	0.0017
							0.0003	0.0017
							0.0003	0.0017
							0.0003	0.0016
							0.0003	0.0016
							0.0003	0.0016
							0.0003	0.0016
							0.0003	0.0016
							0.0003	0.0016
							0.0003	0.0016
							0.0003	0.0016
							0.0002	0.0016
							0.0002	0.0016
							0.0002	0.0016
							0.0002	0.0016
							0.0002	0.0016
							0.0002	0.0016
							0.0002	0.0016
							0.0002	0.0016
							0.0002	0.0016
							0.0002	0.0016
							0.0002	0.0016
							0.0002	0.0016
							0.0002	0.0016
							0.0002	0.0016
							0.0002	0.0016
							0.0002	0.0016
							0.0002	0.0016
								0.0016
								0.0016
								0.0016
								0.0016
								0.0016
								0.0016
								0.0016
								0.0015
								0.0015
								0.0015
								0.0015
								0.0015
								0.0015
								0.0015
								0.0015
								0.0015
								0.0015
								0.0015
								0.0015
								0.0015
								0.0015
								0.0015
								0.0015
								0.0015
								0.0015
								0.0015
								0.0015
								0.0015
								0.0015
								0.0015
								0.0015
								0.0015
								0.0015
								0.0015
								0.0015
								0.0015
								0.0015
								0.0015
								0.0015
								0.0014
								0.0014
								0.0014
								0.0014
								0.0014
								0.0014
								0.0014
								0.0014
								0.0014
								0.0014
								0.0014
								0.0014
								0.0014
								0.0014
								0.0014
								0.0014
								0.0014
								0.0014
								0.0014
								0.0014
								0.0014
								0.0014
								0.0014
								0.0014
								0.0014
								0.0014
								0.0014
								0.0014
								0.0014
								0.0014
								0.0014
								0.0014
								0.0013
								0.0013
								0.0013
								0.0013
								0.0013
								0.0013
								0.0013
								0.0013
								0.0013
								0.0013
								0.0013
								0.0013
								0.0013
								0.0013
								0.0013
								0.0013
								0.0013
								0.0013
								0.0013
								0.0013
								0.0013
								0.0013
								0.0013
								0.0013
								0.0013
								0.0013
								0.0013
								0.0013
								0.0013
								0.0013
								0.0013
								0.0013
								0.0013
								0.0012
								0.0012
								0.0012
								0.0012
								0.0012
								0.0012
								0.0012
								0.0012
								0.0012
								0.0012
								0.0012
								0.0012
								0.0012
								0.0012
								0.0012
								0.0012
								0.0012
								0.0012
								0.0012
								0.0012
								0.0012
								0.0012
								0.0012
								0.0012
								0.0012
								0.0012
								0.0012
								0.0012
								0.0012
								0.0012
								0.0012
								0.0012
								0.0012
								0.0012
								0.0012
								0.0012
								0.0012
								0.0011
								0.0011
								0.0011
								0.0011
								0.0011
								0.0011
								0.0011
								0.0011
								0.0011
								0.0011
								0.0011
								0.0011
								0.0011
								0.0011
								0.0011
								0.0011
								0.0011
								0.0011
								0.0011
								0.0011
								0.0011
								0.0011
								0.0011
								0.0011
								0.0011
								0.0011
								0.0011
								0.0011
								0.0011
								0.001
								0.001
								0.001
								0.001
								0.001
								0.001
								0.001
								0.001
								0.001
								0.001
								0.001
								0.001
								0.001
								0.001
								0.001
								0.001
								0.001
								0.001
								0.001
								0.001
								0.001
								0.001
								0.001
								0.001
								0.001
								0.001
								0.0009
								0.0009
								0.0009
								0.0009
								0.0009
								0.0009
								0.0009
								0.0009
								0.0009
								0.0009
								0.0009
								0.0009
								0.0009
								0.0009
								0.0009
								0.0009
								0.0009
								0.0009
								0.0009
								0.0009
								0.0009
								0.0009
								0.0009
								0.0008
								0.0008
								0.0008
								0.0008
								0.0008
								0.0008
								0.0008
								0.0008
								0.0008
								0.0008
								0.0008
								0.0008
								0.0008
								0.0008
								0.0008
								0.0008
								0.0008
								0.0008
								0.0008
								0.0008
								0.0008
								0.0008
								0.0008
								0.0008
								0.0008
								0.0008
								0.0008
								0.0008
[truncated: 117 more rows]

## Sheet: EGFR_after
	cell#1	cell#2	cell#3	cell#4	cell#5	cell#6	cell#7	cell#8	cell#9	cell#10
cell area	728.022	603.036	641.835	706.364	740.608	734.144	641.498	792.606	591.638	563.878
cluster areas	0.2499	0.2442	0.2431	0.2441	0.248	0.2499	0.2455	0.2436	0.2301	0.2452
	0.2368	0.2385	0.2311	0.2379	0.2408	0.2495	0.2367	0.243	0.2249	0.2321
	0.2259	0.2382	0.2287	0.2362	0.2374	0.2488	0.2316	0.2411	0.2164	0.229
	0.2228	0.2277	0.2203	0.2323	0.2281	0.2466	0.2242	0.2367	0.2137	0.2256
	0.214	0.2135	0.2132	0.2229	0.2248	0.2459	0.2226	0.2343	0.2058	0.2214
	0.2107	0.2035	0.2108	0.2186	0.211	0.2305	0.2183	0.2328	0.2046	0.2204
	0.2081	0.2016	0.2108	0.2102	0.2109	0.228	0.2164	0.2277	0.2018	0.2021
	0.2073	0.1967	0.2049	0.1941	0.2082	0.2256	0.2159	0.2208	0.1827	0.1936
	0.2025	0.1954	0.202	0.1848	0.2068	0.2231	0.2147	0.2135	0.1817	0.189
	0.1993	0.1901	0.2016	0.1812	0.2041	0.2216	0.2118	0.2133	0.1627	0.1821
	0.1964	0.1893	0.1935	0.171	0.2032	0.2212	0.2051	0.2133	0.1603	0.1818
	0.1942	0.1785	0.1929	0.1664	0.2024	0.2097	0.2049	0.2114	0.1598	0.1689
	0.1939	0.1724	0.1909	0.1659	0.2009	0.2074	0.2047	0.2112	0.1477	0.1674
	0.1934	0.1716	0.1909	0.1647	0.1998	0.2073	0.2016	0.2057	0.1373	0.1672
	0.1907	0.1644	0.1827	0.1645	0.1978	0.2045	0.1964	0.2035	0.1372	0.1653
	0.187	0.1622	0.1736	0.1622	0.1977	0.1992	0.1933	0.1988	0.1353	0.1631
	0.1864	0.1559	0.1732	0.1617	0.1941	0.1991	0.1865	0.1972	0.1324	0.1608
	0.1827	0.1447	0.1707	0.1616	0.1941	0.1968	0.1845	0.189	0.1322	0.1573
	0.1785	0.1434	0.1701	0.1605	0.1865	0.1945	0.1843	0.1863	0.1218	0.1564
	0.1718	0.1416	0.163	0.1569	0.1814	0.1867	0.1821	0.1843	0.1203	0.153
	0.1697	0.1401	0.1511	0.1483	0.1807	0.1843	0.1793	0.1834	0.1201	0.1501
	0.1652	0.1388	0.15	0.1478	0.1802	0.1831	0.1787	0.1824	0.1189	0.1454
	0.1648	0.1352	0.1488	0.1409	0.1787	0.1828	0.1787	0.1798	0.1189	0.1396
	0.1621	0.1349	0.1434	0.14	0.1737	0.181	0.1783	0.1787	0.1184	0.1373
	0.1577	0.1339	0.1399	0.1391	0.1701	0.1809	0.1683	0.1765	0.1152	0.1349
	0.1542	0.133	0.1388	0.1384	0.1699	0.1799	0.1661	0.1754	0.1149	0.1288
	0.1528	0.1324	0.1385	0.1366	0.1699	0.1757	0.1654	0.1703	0.1087	0.1268
	0.1512	0.1313	0.1371	0.1356	0.1653	0.1695	0.1624	0.1685	0.1083	0.1267
	0.1478	0.13	0.1332	0.1276	0.1615	0.1602	0.1547	0.1629	0.1077	0.1264
	0.1465	0.1207	0.132	0.1223	0.1599	0.1599	0.1538	0.1618	0.1048	0.1231
	0.144	0.1186	0.1269	0.1204	0.1591	0.1596	0.1513	0.1607	0.1033	0.1143
	0.1425	0.1155	0.1248	0.1204	0.1581	0.1579	0.1511	0.155	0.1024	0.1115
	0.1365	0.1084	0.1153	0.119	0.1561	0.1569	0.1489	0.1525	0.0988	0.1098
	0.1363	0.1082	0.1149	0.1091	0.1539	0.1562	0.1487	0.1515	0.0986	0.1098
	0.1358	0.1064	0.1135	0.1088	0.1536	0.154	0.1465	0.1513	0.0957	0.1088
	0.1323	0.105	0.1127	0.1064	0.1513	0.1484	0.1459	0.1483	0.0927	0.108
	0.1308	0.1041	0.1104	0.1057	0.1491	0.1482	0.1455	0.1377	0.0853	0.1074
	0.1301	0.1031	0.1104	0.1006	0.149	0.1481	0.1427	0.1306	0.0779	0.1057
	0.1301	0.094	0.1069	0.1001	0.1478	0.1473	0.141	0.1275	0.0779	0.1045
	0.1273	0.0938	0.1057	0.0959	0.1478	0.1464	0.1402	0.1274	0.0771	0.1015
	0.1258	0.0905	0.1048	0.0936	0.1456	0.1464	0.1273	0.1234	0.076	0.1004
	0.1254	0.0846	0.0959	0.0925	0.1442	0.1463	0.1268	0.1207	0.0755	0.0998
	0.1237	0.0831	0.0935	0.088	0.1424	0.1444	0.124	0.1204	0.0738	0.0995
	0.1228	0.0801	0.092	0.0879	0.1417	0.1431	0.121	0.1192	0.0734	0.0981
	0.1198	0.0755	0.0906	0.086	0.1386	0.143	0.1209	0.1185	0.0729	0.0968
	0.116	0.0751	0.0902	0.0845	0.1382	0.1358	0.1131	0.115	0.0729	0.0967
	0.114	0.0743	0.089	0.0842	0.1378	0.1346	0.1123	0.1144	0.0708	0.0923
	0.1124	0.0681	0.0857	0.0801	0.1371	0.1324	0.1047	0.111	0.0704	0.0913
	0.1121	0.0669	0.0837	0.0795	0.1352	0.1311	0.1021	0.1092	0.0684	0.084
	0.1114	0.0661	0.0831	0.0763	0.1347	0.1294	0.1012	0.1078	0.0675	0.0838
	0.1114	0.0651	0.0825	0.0736	0.1339	0.1264	0.1002	0.1078	0.0662	0.0834
	0.1113	0.0628	0.0821	0.0734	0.1314	0.1259	0.0987	0.1057	0.0656	0.0832
	0.1064	0.0627	0.076	0.0715	0.1263	0.1259	0.0912	0.1055	0.064	0.0829
	0.1061	0.0614	0.0747	0.0714	0.1259	0.1229	0.0908	0.1055	0.0628	0.0782
	0.1027	0.0591	0.0727	0.0699	0.1257	0.12	0.0892	0.1009	0.0596	0.0702
	0.1024	0.0575	0.072	0.0694	0.1244	0.1199	0.0853	0.1004	0.0585	0.0701
	0.1009	0.0564	0.0703	0.0693	0.1229	0.1199	0.0849	0.0991	0.0579	0.07
	0.0957	0.0555	0.0694	0.0686	0.1208	0.1197	0.0837	0.098	0.0572	0.07
	0.0913	0.0541	0.0682	0.0686	0.1205	0.1195	0.0826	0.0926	0.0567	0.0685
	0.089	0.0541	0.0681	0.0671	0.12	0.1186	0.0815	0.0919	0.0554	0.0679
	0.0887	0.0539	0.0681	0.0642	0.1184	0.1126	0.0811	0.0912	0.0548	0.0668
	0.0875	0.053	0.0633	0.0633	0.1176	0.1122	0.0802	0.0886	0.0541	0.0663
	0.0867	0.0509	0.0632	0.0622	0.1172	0.1103	0.0793	0.0863	0.0532	0.0661
	0.0823	0.0498	0.0632	0.0605	0.1168	0.1078	0.0784	0.0841	0.0523	0.065
	0.0809	0.0495	0.063	0.0601	0.1167	0.1051	0.0783	0.084	0.0523	0.0641
	0.08	0.0481	0.0624	0.0592	0.1167	0.1046	0.0773	0.0832	0.0514	0.0635
	0.0797	0.0474	0.0606	0.0562	0.1143	0.1036	0.0755	0.083	0.0507	0.0618
	0.0793	0.0471	0.0605	0.0553	0.1142	0.103	0.0746	0.0816	0.0488	0.0616
	0.0792	0.0468	0.0602	0.0547	0.1129	0.103	0.0716	0.0813	0.0487	0.0614
	0.0765	0.0467	0.0592	0.0547	0.1128	0.0985	0.0713	0.077	0.0484	0.0558
	0.0734	0.0465	0.0565	0.0543	0.1122	0.0981	0.0704	0.076	0.0484	0.0554
	0.0733	0.0455	0.056	0.0531	0.1116	0.098	0.0685	0.075	0.0472	0.0553
	0.0726	0.0448	0.0556	0.0528	0.1108	0.0976	0.0668	0.0742	0.046	0.055
	0.0725	0.0446	0.0552	0.0522	0.1098	0.0968	0.0644	0.0733	0.0458	0.0544
	0.0715	0.0445	0.0532	0.0516	0.1086	0.0947	0.0644	0.073	0.0456	0.054
	0.07	0.0428	0.0523	0.051	0.108	0.0947	0.0639	0.0729	0.0449	0.0529
	0.0695	0.0427	0.0513	0.051	0.1064	0.0943	0.0609	0.0721	0.0444	0.0509
	0.069	0.0409	0.0488	0.0507	0.1062	0.0933	0.0605	0.0719	0.0423	0.0493
	0.0689	0.0406	0.0486	0.05	0.1057	0.0924	0.06	0.0714	0.0421	0.0481
	0.0665	0.0402	0.0482	0.0478	0.1051	0.0915	0.0579	0.0711	0.0419	0.0478
	0.0662	0.0397	0.047	0.0475	0.1035	0.0903	0.0578	0.07	0.0417	0.0476
	0.0661	0.0393	0.0467	0.0474	0.1025	0.0876	0.0572	0.0681	0.0415	0.0469
	0.065	0.0392	0.0465	0.0473	0.1023	0.0875	0.0568	0.0681	0.0413	0.0461
	0.0639	0.0389	0.0461	0.0444	0.0987	0.0857	0.0557	0.0675	0.0411	0.0461
	0.0637	0.0387	0.0461	0.0444	0.0985	0.0844	0.054	0.0671	0.0409	0.046
	0.063	0.0385	0.046	0.0442	0.0928	0.0843	0.0539	0.0653	0.0407	0.0458
	0.0629	0.0383	0.0455	0.0439	0.0917	0.0834	0.0535	0.0652	0.04	0.0455
	0.0627	0.0374	0.045	0.0438	0.0881	0.0831	0.0531	0.065	0.0393	0.0443
	0.0627	0.0374	0.0442	0.043	0.0868	0.0828	0.052	0.0642	0.039	0.0443
	0.0623	0.0369	0.0439	0.0426	0.0861	0.0809	0.0509	0.0633	0.038	0.0442
	0.0617	0.0368	0.0437	0.0425	0.0856	0.0806	0.0488	0.0628	0.0376	0.0433
	0.0616	0.0368	0.0431	0.042	0.0855	0.0779	0.0487	0.0615	0.0376	0.0428
	0.0613	0.0364	0.0428	0.0419	0.0846	0.0774	0.0482	0.0609	0.0368	0.0417
	0.0592	0.036	0.0426	0.0413	0.0824	0.0771	0.0477	0.0603	0.0364	0.0409
	0.0584	0.0356	0.0423	0.0413	0.0808	0.0768	0.0474	0.0602	0.0364	0.0405
	0.0572	0.0355	0.0418	0.041	0.0798	0.0756	0.0462	0.0596	0.0363	0.0404
	0.0557	0.0353	0.0414	0.0397	0.0791	0.0755	0.0461	0.0584	0.0361	0.0404
	0.0556	0.035	0.0403	0.0391	0.0767	0.0749	0.046	0.0584	0.0356	0.0402
	0.0554	0.0345	0.04	0.0385	0.0756	0.0743	0.0457	0.0581	0.0356	0.0395
	0.0539	0.034	0.0395	0.0382	0.0751	0.0716	0.0451	0.0581	0.0351	0.0392
	0.0529	0.0337	0.0393	0.0381	0.0744	0.0713	0.0448	0.0578	0.035	0.0387
	0.0524	0.0321	0.0387	0.0378	0.0738	0.0701	0.0438	0.0577	0.0346	0.038
	0.0515	0.032	0.038	0.0371	0.0736	0.0689	0.0436	0.057	0.0346	0.0362
	0.0514	0.0319	0.0377	0.0369	0.0726	0.0667	0.0435	0.0561	0.0341	0.0361
	0.0511	0.0319	0.0369	0.0366	0.0706	0.0663	0.0428	0.0553	0.033	0.036
	0.0505	0.0317	0.0368	0.0364	0.0703	0.0662	0.0427	0.0552	0.0329	0.0342
	0.0502	0.0317	0.0364	0.0364	0.0686	0.0655	0.0404	0.0552	0.0325	0.0337
	0.0499	0.0316	0.0361	0.0362	0.0677	0.0646	0.0375	0.0542	0.032	0.0331
	0.0488	0.0315	0.0359	0.0361	0.064	0.0645	0.0375	0.0538	0.0318	0.0325
	0.0486	0.0314	0.0359	0.0355	0.0629	0.0636	0.0368	0.0535	0.0316	0.0325
	0.0469	0.0313	0.0354	0.0342	0.0609	0.063	0.036	0.0535	0.0309	0.0325
	0.0455	0.031	0.0354	0.034	0.0602	0.0627	0.0358	0.0534	0.0307	0.0324
	0.0454	0.0305	0.0353	0.0339	0.0599	0.0626	0.0355	0.0529	0.0305	0.0313
	0.0449	0.0304	0.0351	0.0338	0.0585	0.0616	0.0348	0.052	0.03	0.0309
	0.0447	0.0302	0.035	0.0335	0.0546	0.0614	0.0348	0.0514	0.03	0.0309
	0.0444	0.0301	0.0346	0.0335	0.0529	0.0612	0.0346	0.0511	0.0297	0.0309
	0.0444	0.03	0.0344	0.0334	0.0524	0.0607	0.0343	0.0505	0.0297	0.0304
	0.0442	0.0299	0.0334	0.0331	0.0518	0.0594	0.0342	0.05	0.0296	0.0303
	0.0442	0.0297	0.0334	0.033	0.0509	0.059	0.0342	0.0499	0.0292	0.0301
	0.0437	0.0296	0.0333	0.0325	0.0506	0.0583	0.034	0.049	0.0289	0.03
	0.043	0.0296	0.0324	0.032	0.05	0.0582	0.0338	0.0484	0.0286	0.0298
	0.0425	0.0296	0.0318	0.0317	0.05	0.0579	0.0336	0.0483	0.0284	0.0295
	0.0421	0.0295	0.0315	0.0316	0.0488	0.0577	0.0332	0.0479	0.0284	0.0294
	0.0421	0.0295	0.0313	0.0313	0.0486	0.0571	0.0331	0.0476	0.0284	0.0292
	0.042	0.0292	0.0312	0.0312	0.048	0.0567	0.0328	0.0476	0.0282	0.029
	0.042	0.0284	0.0311	0.031	0.0465	0.0557	0.032	0.0472	0.0281	0.0286
	0.0418	0.0282	0.0305	0.031	0.0464	0.0548	0.0316	0.0468	0.0279	0.0286
	0.041	0.0278	0.0301	0.0309	0.0449	0.0541	0.0315	0.0467	0.0278	0.0282
	0.0407	0.0276	0.0301	0.0305	0.0447	0.053	0.0305	0.0452	0.0276	0.0279
	0.0401	0.0273	0.0301	0.0303	0.0446	0.0526	0.03	0.0443	0.0275	0.0277
	0.04	0.0272	0.0301	0.0299	0.0444	0.0524	0.0299	0.0435	0.0273	0.0276
	0.0397	0.0272	0.03	0.0299	0.0441	0.0513	0.0296	0.0427	0.0267	0.027
	0.0397	0.0268	0.0296	0.0298	0.043	0.051	0.0296	0.0425	0.0266	0.0269
	0.0395	0.0267	0.0296	0.0295	0.0429	0.0501	0.0296	0.0425	0.0264	0.0267
	0.0391	0.0266	0.0295	0.0288	0.042	0.0497	0.0288	0.042	0.0264	0.0266
	0.0389	0.0263	0.0294	0.0288	0.0419	0.0491	0.0285	0.0418	0.026	0.0263
	0.0387	0.0262	0.0293	0.0287	0.0418	0.0488	0.0284	0.0415	0.0259	0.026
	0.0386	0.0262	0.0293	0.0286	0.0412	0.0477	0.0279	0.0415	0.0258	0.026
	0.0385	0.026	0.029	0.0282	0.0408	0.0475	0.0277	0.0413	0.0256	0.0259
	0.0382	0.0257	0.0288	0.0281	0.0407	0.0471	0.0269	0.0409	0.0253	0.0257
	0.037	0.0256	0.0286	0.0281	0.0404	0.0457	0.0267	0.0399	0.0252	0.0253
	0.0369	0.0256	0.0283	0.0277	0.0403	0.0453	0.0264	0.0395	0.0251	0.0252
	0.0368	0.0254	0.0283	0.0275	0.0401	0.0452	0.0262	0.0394	0.0251	0.0248
	0.0366	0.0253	0.0282	0.027	0.0396	0.0452	0.0261	0.0392	0.025	0.0246
	0.0365	0.0252	0.0279	0.0269	0.0388	0.0448	0.0261	0.039	0.0247	0.0244
	0.0361	0.025	0.0274	0.0268	0.0384	0.0442	0.026	0.0388	0.0246	0.0242
	0.036	0.0249	0.0273	0.0268	0.0379	0.0435	0.0252	0.0386	0.0243	0.0242
	0.0359	0.0246	0.0272	0.0267	0.0373	0.0434	0.025	0.0379	0.0242	0.0241
	0.0352	0.0246	0.0271	0.0267	0.0371	0.0428	0.025	0.0377	0.0241	0.024
	0.0351	0.0245	0.0265	0.0266	0.0369	0.0419	0.0249	0.0371	0.0237	0.024
	0.035	0.0242	0.0264	0.0264	0.0364	0.0414	0.0244	0.0367	0.0234	0.0239
	0.0348	0.0241	0.0263	0.0263	0.0364	0.041	0.0244	0.0366	0.0234	0.0239
	0.0345	0.024	0.0262	0.026	0.0363	0.0409	0.0242	0.0364	0.0233	0.0238
	0.0344	0.024	0.0261	0.0259	0.036	0.0405	0.0241	0.0362	0.0233	0.0238
	0.0341	0.0239	0.026	0.0257	0.0359	0.0391	0.0241	0.0359	0.0228	0.0237
	0.0335	0.0237	0.0259	0.0257	0.0357	0.0389	0.0239	0.0358	0.0226	0.0236
	0.0333	0.0237	0.0258	0.0255	0.0356	0.0389	0.0232	0.0357	0.0226	0.0235
	0.0323	0.0236	0.0257	0.0253	0.0355	0.0388	0.0231	0.0357	0.0225	0.0232
	0.032	0.0236	0.0251	0.0249	0.0355	0.0387	0.0231	0.0354	0.0225	0.023
	0.0319	0.0233	0.025	0.0248	0.0349	0.0385	0.023	0.0353	0.0222	0.0228
	0.0313	0.0233	0.025	0.0247	0.0349	0.0383	0.023	0.035	0.0221	0.0226
	0.0312	0.0233	0.0249	0.0244	0.0347	0.038	0.0228	0.0346	0.022	0.0226
	0.031	0.023	0.0248	0.0243	0.0347	0.038	0.0227	0.0345	0.0219	0.0226
	0.0308	0.0228	0.0247	0.0243	0.0345	0.0378	0.0227	0.0342	0.0218	0.0226
	0.0305	0.0222	0.0246	0.0242	0.0345	0.0376	0.0224	0.0337	0.0218	0.0222
	0.0298	0.0222	0.0246	0.0237	0.0344	0.037	0.0223	0.0336	0.0217	0.0221
	0.0297	0.0221	0.0246	0.0233	0.0331	0.037	0.0222	0.0331	0.0216	0.022
	0.0296	0.0219	0.0246	0.0232	0.0326	0.0366	0.0222	0.0331	0.0214	0.022
	0.0293	0.0216	0.0245	0.0231	0.0326	0.0365	0.0222	0.0326	0.0214	0.0219
	0.0291	0.0216	0.0244	0.0231	0.0324	0.0364	0.0221	0.0324	0.0213	0.0219
	0.0287	0.0214	0.0242	0.023	0.0324	0.036	0.022	0.0323	0.0211	0.0218
	0.0285	0.0213	0.0242	0.0229	0.032	0.0358	0.022	0.0323	0.0205	0.0217
	0.0281	0.0212	0.024	0.0225	0.032	0.0358	0.0219	0.032	0.0205	0.0216
	0.0278	0.0212	0.0239	0.0225	0.0315	0.0356	0.0218	0.032	0.0204	0.0215
	0.0278	0.0211	0.0238	0.0225	0.0314	0.0342	0.0212	0.0319	0.0203	0.0214
	0.0277	0.0209	0.0237	0.0224	0.0313	0.0342	0.0212	0.0317	0.0203	0.0214
	0.0275	0.0205	0.0237	0.0224	0.0311	0.0336	0.0209	0.0316	0.0203	0.0213
	0.0271	0.0205	0.0236	0.0223	0.031	0.0332	0.0209	0.0315	0.0202	0.0213
	0.027	0.0205	0.0236	0.0223	0.0309	0.0327	0.0204	0.0315	0.0202	0.0213
	0.0269	0.0204	0.0232	0.0223	0.0306	0.0325	0.0204	0.0313	0.0201	0.0211
	0.0268	0.0203	0.0232	0.0222	0.0304	0.0324	0.0202	0.0312	0.02	0.021
	0.0268	0.0201	0.0231	0.0221	0.0304	0.0324	0.0202	0.0308	0.0199	0.0209
	0.0267	0.02	0.0231	0.0221	0.0301	0.0319	0.0202	0.0305	0.0196	0.0209
	0.0264	0.02	0.0226	0.0221	0.0299	0.0319	0.0198	0.0305	0.0195	0.0209
	0.0264	0.0198	0.0223	0.0217	0.0299	0.0316	0.0197	0.0304	0.0195	0.0207
	0.0261	0.0195	0.0221	0.0216	0.0297	0.0315	0.0196	0.0302	0.0195	0.0207
	0.0256	0.0195	0.0221	0.0215	0.0293	0.0313	0.0194	0.03	0.0194	0.0206
	0.0255	0.0195	0.0219	0.0213	0.029	0.0312	0.0193	0.0299	0.0194	0.0205
	0.0254	0.0194	0.0218	0.0212	0.0288	0.0311	0.0193	0.0298	0.0193	0.0204
	0.0252	0.0194	0.0215	0.0209	0.0288	0.031	0.019	0.0294	0.0192	0.0204
	0.0252	0.0194	0.0215	0.0209	0.0284	0.0309	0.0189	0.0289	0.0191	0.0203
	0.0252	0.0194	0.0214	0.0206	0.028	0.0309	0.0186	0.0288	0.0191	0.0202
	0.0252	0.0193	0.0214	0.0206	0.028	0.0305	0.0183	0.0285	0.019	0.0202
	0.025	0.0191	0.0213	0.0206	0.0278	0.0304	0.0181	0.0284	0.0189	0.0199
	0.0246	0.0191	0.0212	0.0204	0.0278	0.0298	0.0179	0.0278	0.0188	0.0198
	0.0244	0.0189	0.021	0.0203	0.0275	0.0298	0.0178	0.0277	0.0188	0.0198
	0.0241	0.0189	0.0209	0.0203	0.0275	0.0297	0.0175	0.0276	0.0188	0.0197
	0.0241	0.0188	0.0205	0.02	0.0274	0.0295	0.0175	0.0275	0.0187	0.0197
	0.0236	0.0188	0.0203	0.02	0.0273	0.0295	0.0175	0.0273	0.0186	0.0197
	0.0228	0.0188	0.0203	0.02	0.0271	0.0293	0.0173	0.0272	0.0184	0.0196
	0.0227	0.0187	0.0203	0.02	0.027	0.0292	0.0173	0.0272	0.0181	0.0195
	0.0226	0.0186	0.02	0.0197	0.0268	0.029	0.0173	0.0271	0.0179	0.0194
	0.0226	0.0184	0.02	0.0197	0.0268	0.0289	0.0172	0.0268	0.0178	0.0194
	0.0225	0.0184	0.0199	0.0197	0.0267	0.0287	0.0172	0.0268	0.0176	0.0192
	0.0225	0.018	0.0199	0.0197	0.0267	0.0284	0.0171	0.0267	0.0176	0.0191
	0.0225	0.018	0.0199	0.0193	0.0266	0.0282	0.0171	0.0266	0.0176	0.019
	0.0225	0.0178	0.0197	0.019	0.0266	0.028	0.0171	0.0265	0.0175	0.019
	0.0224	0.0178	0.0197	0.0188	0.0265	0.0278	0.017	0.0264	0.0175	0.0189
	0.0223	0.0177	0.0197	0.0186	0.0264	0.0278	0.0168	0.0263	0.0175	0.0188
	0.0221	0.0175	0.0197	0.0185	0.0264	0.0277	0.0168	0.0263	0.0175	0.0187
	0.022	0.0174	0.0195	0.0184	0.0263	0.0277	0.0165	0.0261	0.0174	0.0185
	0.0219	0.0172	0.019	0.0183	0.0263	0.0275	0.0165	0.026	0.0174	0.0185
	0.0218	0.0171	0.0189	0.0181	0.0261	0.0275	0.0165	0.026	0.0174	0.0184
	0.0217	0.0171	0.0189	0.0179	0.0259	0.0274	0.0164	0.0259	0.0174	0.0184
	0.0216	0.017	0.0188	0.0178	0.0258	0.0273	0.0162	0.0256	0.0174	0.0183
	0.0216	0.0169	0.0188	0.0177	0.0258	0.0272	0.016	0.0254	0.0173	0.0182
	0.0216	0.0169	0.0187	0.0177	0.0257	0.027	0.016	0.0252	0.0173	0.018
	0.0209	0.0169	0.0183	0.0177	0.0256	0.0265	0.0159	0.0251	0.0173	0.0178
	0.0208	0.0168	0.0183	0.0176	0.0255	0.0264	0.0159	0.0251	0.0173	0.0175
	0.0203	0.0168	0.0181	0.0175	0.0255	0.0264	0.0159	0.0251	0.0171	0.0174
	0.0203	0.0168	0.018	0.0175	0.0254	0.0263	0.0157	0.0244	0.0169	0.0173
	0.0202	0.0168	0.0177	0.0174	0.025	0.0262	0.0156	0.0243	0.0169	0.0173
	0.0201	0.0167	0.0176	0.0174	0.0246	0.0262	0.0156	0.0243	0.0168	0.0172
	0.0199	0.0166	0.0173	0.0173	0.0246	0.0261	0.0155	0.0242	0.0166	0.017
	0.0199	0.0166	0.0173	0.017	0.0246	0.026	0.0155	0.0241	0.0165	0.017
	0.0198	0.0165	0.0172	0.017	0.0245	0.0258	0.0155	0.0241	0.0165	0.017
	0.0197	0.0164	0.0171	0.017	0.0244	0.0256	0.0154	0.024	0.0165	0.017
	0.0197	0.0164	0.017	0.017	0.0244	0.0254	0.0154	0.024	0.0164	0.0169
	0.0197	0.0162	0.0169	0.0169	0.0243	0.0254	0.0154	0.0237	0.0163	0.0168
	0.0196	0.016	0.0168	0.0169	0.0242	0.0253	0.0152	0.0237	0.0163	0.0167
	0.0196	0.016	0.0167	0.0168	0.0241	0.0252	0.0152	0.0236	0.0162	0.0166
	0.0196	0.016	0.0166	0.0168	0.0239	0.0251	0.0151	0.0236	0.0162	0.0166
	0.0195	0.0158	0.0165	0.0167	0.0238	0.0246	0.0149	0.0236	0.0162	0.0164
	0.0195	0.0157	0.0165	0.0167	0.0238	0.0246	0.0149	0.0234	0.0161	0.0164
	0.0194	0.0155	0.0163	0.0165	0.0238	0.0245	0.0149	0.0232	0.0161	0.0163
	0.0192	0.0155	0.0163	0.0165	0.0236	0.0244	0.0148	0.0228	0.016	0.0162
	0.0191	0.0155	0.0161	0.0164	0.0234	0.0243	0.0147	0.0228	0.016	0.0162
	0.019	0.0153	0.016	0.0164	0.0233	0.0242	0.0146	0.0222	0.0159	0.0161
	0.0188	0.0152	0.0159	0.0164	0.0233	0.0241	0.0146	0.022	0.0159	0.0161
	0.0186	0.0152	0.0159	0.0163	0.023	0.024	0.0146	0.0218	0.0159	0.016
	0.0186	0.0152	0.0158	0.0162	0.023	0.0239	0.0145	0.0218	0.0158	0.016
	0.0186	0.015	0.0158	0.0162	0.023	0.0239	0.0145	0.0218	0.0157	0.0158
	0.0184	0.0149	0.0157	0.0161	0.0229	0.0238	0.0145	0.0218	0.0155	0.0158
	0.0183	0.0149	0.0156	0.0161	0.0227	0.0238	0.0144	0.0218	0.0155	0.0157
	0.0182	0.0148	0.0156	0.016	0.0223	0.0234	0.0144	0.0216	0.0155	0.0157
	0.0182	0.0147	0.0156	0.016	0.0222	0.0234	0.0143	0.0213	0.0155	0.0156
	0.0181	0.0147	0.0155	0.016	0.0222	0.0234	0.0143	0.0212	0.0154	0.0155
	0.018	0.0146	0.0155	0.016	0.0222	0.0233	0.0143	0.0211	0.0153	0.0155
	0.0179	0.0146	0.0154	0.0159	0.0221	0.0233	0.0142	0.0211	0.0153	0.0154
	0.0179	0.0146	0.0154	0.0159	0.0221	0.0229	0.0142	0.021	0.0152	0.0153
	0.0178	0.0145	0.0153	0.0158	0.022	0.0229	0.0141	0.0207	0.0152	0.0152
	0.0176	0.0144	0.0153	0.0158	0.022	0.0229	0.0141	0.0207	0.0152	0.0151
	0.0175	0.0144	0.0152	0.0158	0.022	0.0228	0.014	0.0206	0.0152	0.0151
	0.0174	0.0144	0.0152	0.0157	0.0218	0.0228	0.0139	0.0206	0.0151	0.015
	0.0174	0.0141	0.0151	0.0156	0.0218	0.0227	0.0139	0.0203	0.0151	0.015
	0.0173	0.0141	0.0151	0.0155	0.0218	0.0226	0.0139	0.0202	0.0151	0.015
	0.0171	0.014	0.015	0.0155	0.0217	0.0226	0.0138	0.0202	0.0151	0.0149
	0.017	0.014	0.015	0.0155	0.0216	0.0224	0.0137	0.0201	0.0149	0.0149
	0.017	0.0139	0.0149	0.0154	0.0214	0.0223	0.0137	0.0201	0.0149	0.0149
	0.0168	0.0139	0.0148	0.0153	0.0212	0.0221	0.0137	0.0201	0.0149	0.0149
	0.0167	0.0139	0.0148	0.0153	0.0211	0.0219	0.0137	0.0199	0.0147	0.0149
	0.0166	0.0138	0.0148	0.0153	0.0211	0.0219	0.0137	0.0199	0.0147	0.0148
	0.0166	0.0137	0.0147	0.0152	0.0211	0.0218	0.0136	0.0197	0.0147	0.0147
	0.0165	0.0136	0.0147	0.0151	0.021	0.0218	0.0135	0.0197	0.0146	0.0147
	0.0164	0.0136	0.0147	0.015	0.0209	0.0218	0.0134	0.0197	0.0146	0.0147
	0.0164	0.0136	0.0146	0.015	0.0208	0.0216	0.0134	0.0196	0.0145	0.0146
	0.0163	0.0136	0.0146	0.015	0.0207	0.0216	0.0133	0.0196	0.0145	0.0146
	0.0162	0.0136	0.0145	0.015	0.0206	0.0214	0.0132	0.0195	0.0143	0.0145
	0.0162	0.0135	0.0145	0.015	0.0204	0.0214	0.0131	0.0194	0.0142	0.0145
	0.016	0.0135	0.0145	0.015	0.0204	0.0212	0.0131	0.0193	0.0142	0.0144
	0.016	0.0135	0.0143	0.0149	0.0203	0.0211	0.0131	0.0192	0.0142	0.0144
	0.016	0.0134	0.0143	0.0149	0.0202	0.0211	0.013	0.0192	0.0142	0.0144
	0.016	0.0134	0.0143	0.0148	0.0202	0.0209	0.0129	0.0192	0.0142	0.0143
	0.0159	0.0134	0.0143	0.0147	0.02	0.0209	0.0129	0.0191	0.0141	0.0142
	0.0159	0.0134	0.0142	0.0147	0.0199	0.0206	0.0128	0.0191	0.0141	0.0141
	0.0158	0.0133	0.0142	0.0146	0.0199	0.0206	0.0128	0.019	0.0141	0.0141
	0.0157	0.0132	0.0142	0.0146	0.0197	0.0204	0.0127	0.0184	0.0141	0.0141
	0.0155	0.0132	0.0141	0.0145	0.0197	0.0204	0.0127	0.0182	0.0141	0.0141
	0.0154	0.0132	0.0141	0.0144	0.0196	0.0201	0.0127	0.0182	0.0141	0.014
	0.0153	0.0131	0.014	0.0144	0.0196	0.0199	0.0126	0.0182	0.014	0.014
	0.0153	0.0131	0.0139	0.0144	0.0196	0.0198	0.0126	0.018	0.014	0.0139
	0.0152	0.013	0.0139	0.0144	0.0195	0.0198	0.0126	0.018	0.014	0.0138
	0.0151	0.013	0.0137	0.0143	0.0194	0.0198	0.0126	0.0177	0.0139	0.0138
	0.0151	0.013	0.0137	0.0143	0.0194	0.0195	0.0125	0.0177	0.0139	0.0138
	0.015	0.0129	0.0137	0.0142	0.0193	0.0194	0.0125	0.0176	0.0138	0.0138
	0.015	0.0129	0.0136	0.0141	0.0193	0.0193	0.0125	0.0175	0.0137	0.0138
	0.015	0.0128	0.0136	0.0141	0.0192	0.0192	0.0124	0.0175	0.0136	0.0137
	0.015	0.0128	0.0136	0.0141	0.0192	0.0192	0.0123	0.0173	0.0136	0.0136
	0.0148	0.0127	0.0135	0.0141	0.0191	0.0191	0.0122	0.0173	0.0136	0.0135
	0.0147	0.0125	0.0135	0.014	0.0189	0.019	0.012	0.0173	0.0136	0.0134
	0.0143	0.0124	0.0135	0.014	0.0188	0.019	0.012	0.0173	0.0136	0.0133
	0.0143	0.0124	0.0135	0.014	0.0188	0.0189	0.0119	0.0172	0.0135	0.0133
	0.0143	0.0122	0.0134	0.0137	0.0187	0.0189	0.0119	0.017	0.0135	0.0132
	0.0143	0.0122	0.0134	0.0137	0.0186	0.0187	0.0119	0.017	0.0135	0.0131
	0.014	0.0121	0.0134	0.0136	0.0185	0.0186	0.0118	0.0169	0.0134	0.0131
	0.0139	0.0119	0.0134	0.0136	0.0183	0.0185	0.0118	0.0169	0.0134	0.0131
	0.0138	0.0119	0.0134	0.0136	0.0182	0.0184	0.0117	0.0169	0.0134	0.0131
	0.0137	0.0119	0.0134	0.0136	0.0179	0.0184	0.0117	0.0168	0.0132	0.013
	0.0137	0.0118	0.0132	0.0136	0.0179	0.0183	0.0117	0.0168	0.0131	0.013
	0.0137	0.0118	0.0132	0.0135	0.0179	0.0182	0.0116	0.0168	0.0131	0.0129
	0.0136	0.0117	0.0131	0.0135	0.0178	0.018	0.0116	0.0167	0.013	0.0128
	0.0136	0.0117	0.013	0.0134	0.0178	0.018	0.0116	0.0167	0.013	0.0128
	0.0135	0.0117	0.013	0.0133	0.0178	0.0179	0.0115	0.0167	0.0129	0.0127
	0.0135	0.0116	0.013	0.0133	0.0178	0.0179	0.0115	0.0166	0.0128	0.0126
	0.0135	0.0116	0.0129	0.0132	0.0178	0.0177	0.0115	0.0165	0.0128	0.0126
	0.0134	0.0116	0.0129	0.0131	0.0177	0.0176	0.0114	0.0165	0.0128	0.0125
	0.0133	0.0116	0.0128	0.0131	0.0177	0.0175	0.0113	0.0165	0.0128	0.0125
	0.0132	0.0115	0.0128	0.0131	0.0177	0.0175	0.0113	0.0164	0.0127	0.0124
	0.0132	0.0114	0.0128	0.0131	0.0176	0.0174	0.0113	0.0162	0.0127	0.0124
	0.0132	0.0114	0.0128	0.0131	0.0175	0.0174	0.0113	0.0162	0.0127	0.0124
	0.013	0.0113	0.0127	0.013	0.0175	0.0173	0.0112	0.0161	0.0127	0.0123
	0.0129	0.0113	0.0127	0.013	0.0174	0.0172	0.0111	0.0161	0.0126	0.0123
	0.0129	0.0112	0.0126	0.0129	0.0173	0.0171	0.0111	0.016	0.0126	0.0123
	0.0129	0.0112	0.0125	0.0128	0.0172	0.0171	0.011	0.0159	0.0126	0.0123
	0.0129	0.0112	0.0125	0.0128	0.0172	0.017	0.0109	0.0159	0.0126	0.0122
	0.0128	0.0112	0.0124	0.0128	0.0171	0.017	0.0108	0.0158	0.0125	0.0121
	0.0127	0.0112	0.0124	0.0128	0.0171	0.0168	0.0108	0.0158	0.0124	0.0121
	0.0127	0.0111	0.0124	0.0127	0.017	0.0166	0.0108	0.0158	0.0124	0.0121
	0.0126	0.0109	0.0123	0.0127	0.0169	0.0166	0.0108	0.0157	0.0124	0.012
	0.0122	0.0109	0.0122	0.0126	0.0168	0.0165	0.0108	0.0157	0.0124	0.012
	0.0122	0.0107	0.012	0.0126	0.0167	0.0165	0.0107	0.0156	0.0124	0.012
	0.0122	0.0107	0.012	0.0126	0.0166	0.0165	0.0107	0.0155	0.0122	0.012
	0.0121	0.0107	0.012	0.0125	0.0166	0.0164	0.0106	0.0154	0.0122	0.012
	0.0121	0.0106	0.0118	0.0124	0.0166	0.0164	0.0106	0.0153	0.0122	0.012
	0.012	0.0106	0.0118	0.0124	0.0165	0.0163	0.0106	0.0153	0.0121	0.012
	0.012	0.0106	0.0118	0.0124	0.0165	0.0163	0.0105	0.0152	0.0121	0.012
	0.0119	0.0104	0.0118	0.0123	0.0165	0.0163	0.0105	0.0152	0.0121	0.0119
	0.0118	0.0104	0.0117	0.0123	0.0165	0.0162	0.0104	0.0152	0.0121	0.0119
	0.0118	0.0104	0.0117	0.0123	0.0165	0.0161	0.0104	0.0152	0.0121	0.0118
	0.0118	0.0104	0.0116	0.0122	0.0164	0.0161	0.0104	0.015	0.0121	0.0118
	0.0117	0.0104	0.0116	0.0122	0.0164	0.016	0.0103	0.0149	0.012	0.0118
	0.0116	0.0104	0.0116	0.0122	0.0164	0.0159	0.0103	0.0149	0.012	0.0117
	0.0114	0.0103	0.0115	0.0122	0.0163	0.0159	0.0102	0.0149	0.012	0.0117
	0.0113	0.0103	0.0115	0.0121	0.0163	0.0159	0.0102	0.0147	0.0119	0.0117
	0.0112	0.0103	0.0115	0.0121	0.0163	0.0159	0.0101	0.0146	0.0119	0.0117
	0.0109	0.0102	0.0115	0.0121	0.0162	0.0159	0.0101	0.0146	0.0119	0.0117
	0.0109	0.0101	0.0115	0.0121	0.0162	0.0159	0.01	0.0145	0.0118	0.0116
	0.0108	0.0101	0.0114	0.012	0.0162	0.0159	0.01	0.0145	0.0117	0.0116
	0.0107	0.0101	0.0114	0.012	0.0162	0.0159	0.0098	0.0144	0.0117	0.0116
	0.0107	0.01	0.0114	0.012	0.0161	0.0158	0.0097	0.0144	0.0116	0.0116
	0.0107	0.01	0.0113	0.0119	0.0159	0.0158	0.0097	0.0143	0.0116	0.0115
	0.0106	0.01	0.0112	0.0119	0.0158	0.0158	0.0097	0.0142	0.0115	0.0115
	0.0106	0.01	0.0112	0.0119	0.0158	0.0157	0.0095	0.0141	0.0115	0.0115
	0.0106	0.01	0.0112	0.0119	0.0157	0.0157	0.0095	0.0141	0.0115	0.0115
	0.0106	0.01	0.0111	0.0119	0.0157	0.0157	0.0093	0.0139	0.0113	0.0114
	0.0106	0.0099	0.011	0.0117	0.0157	0.0156	0.0093	0.0139	0.0112	0.0114
	0.0105	0.0099	0.0108	0.0117	0.0155	0.0155	0.0092	0.0139	0.0112	0.0114
	0.0104	0.0098	0.0108	0.0117	0.0155	0.0155	0.0092	0.0138	0.0112	0.0113
	0.0103	0.0098	0.0107	0.0116	0.0154	0.0155	0.0091	0.0138	0.0112	0.0113
	0.0103	0.0098	0.0107	0.0116	0.0153	0.0154	0.009	0.0137	0.0111	0.0112
	0.0102	0.0097	0.0107	0.0116	0.0153	0.0154	0.009	0.0137	0.0111	0.0112
	0.0102	0.0097	0.0107	0.0116	0.0153	0.0153	0.009	0.0137	0.0111	0.0112
	0.0102	0.0097	0.0106	0.0116	0.0151	0.0152	0.009	0.0136	0.0111	0.0112
	0.0102	0.0096	0.0106	0.0115	0.0151	0.0152	0.0089	0.0136	0.011	0.0112
	0.0101	0.0096	0.0106	0.0115	0.0149	0.0151	0.0089	0.0135	0.011	0.0112
	0.0101	0.0096	0.0106	0.0115	0.0149	0.015	0.0088	0.0135	0.0109	0.0111
	0.01	0.0096	0.0105	0.0115	0.0149	0.0149	0.0087	0.0135	0.0109	0.0111
	0.01	0.0095	0.0105	0.0114	0.0147	0.0147	0.0086	0.0135	0.0109	0.0111
	0.0099	0.0095	0.0105	0.0114	0.0146	0.0147	0.0086	0.0134	0.0108	0.011
	0.0097	0.0095	0.0104	0.0114	0.0146	0.0147	0.0086	0.0134	0.0108	0.011
	0.0096	0.0093	0.0104	0.0114	0.0146	0.0147	0.0086	0.0133	0.0106	0.011
	0.0096	0.0093	0.0104	0.0114	0.0146	0.0146	0.0086	0.0133	0.0106	0.011
	0.0095	0.0093	0.0104	0.0114	0.0146	0.0146	0.0085	0.0132	0.0105	0.011
	0.0094	0.0093	0.0103	0.0114	0.0145	0.0145	0.0085	0.0131	0.0105	0.011
	0.0094	0.0093	0.0103	0.0114	0.0145	0.0145	0.0085	0.0131	0.0104	0.0109
	0.0093	0.0093	0.0103	0.0113	0.0145	0.0144	0.0085	0.0131	0.0104	0.0109
	0.0093	0.0093	0.0103	0.0113	0.0143	0.0144	0.0085	0.0131	0.0104	0.0109
	0.0092	0.0093	0.0103	0.0113	0.0143	0.0144	0.0084	0.0129	0.0104	0.0109
	0.0092	0.0092	0.0102	0.0113	0.0143	0.0144	0.0084	0.0129	0.0104	0.0108
	0.0091	0.0092	0.0102	0.0113	0.0142	0.0143	0.0083	0.0129	0.0103	0.0108
	0.0091	0.0091	0.0102	0.0112	0.0142	0.0143	0.0083	0.0128	0.0103	0.0108
	0.009	0.0091	0.0102	0.0111	0.0141	0.0143	0.0082	0.0128	0.0103	0.0108
	0.0089	0.0091	0.0102	0.0111	0.0141	0.0143	0.0082	0.0128	0.0103	0.0108
	0.0089	0.0091	0.0101	0.0111	0.014	0.0143	0.0082	0.0128	0.0103	0.0107
	0.0089	0.009	0.0101	0.0111	0.014	0.0142	0.0081	0.0128	0.0103	0.0107
	0.0088	0.009	0.0101	0.0111	0.014	0.0142	0.0081	0.0128	0.0103	0.0106
	0.0087	0.009	0.0101	0.0111	0.0139	0.0141	0.008	0.0128	0.0103	0.0106
	0.0087	0.0089	0.01	0.011	0.0138	0.014	0.0079	0.0127	0.0102	0.0106
	0.0086	0.0089	0.0099	0.011	0.0137	0.014	0.0079	0.0127	0.0102	0.0105
	0.0086	0.0089	0.0099	0.0109	0.0137	0.0139	0.0079	0.0127	0.0101	0.0105
	0.0085	0.0089	0.0099	0.0109	0.0137	0.0138	0.0078	0.0127	0.0101	0.0105
	0.0085	0.0089	0.0098	0.0109	0.0137	0.0138	0.0078	0.0126	0.0101	0.0105
	0.0085	0.0089	0.0098	0.0109	0.0137	0.0137	0.0078	0.0126	0.0101	0.0104
	0.0085	0.0088	0.0098	0.0109	0.0135	0.0136	0.0077	0.0126	0.0101	0.0104
	0.0084	0.0088	0.0098	0.0108	0.0135	0.0135	0.0077	0.0125	0.01	0.0103
	0.0083	0.0088	0.0097	0.0108	0.0134	0.0134	0.0077	0.0125	0.0099	0.0103
	0.0082	0.0088	0.0096	0.0108	0.0134	0.0134	0.0077	0.0125	0.0099	0.0103
	0.008	0.0088	0.0096	0.0108	0.0134	0.0134	0.0076	0.0125	0.0098	0.0103
	0.0079	0.0087	0.0096	0.0107	0.0134	0.0134	0.0076	0.0124	0.0098	0.0102
	0.0079	0.0087	0.0096	0.0107	0.0134	0.0134	0.0075	0.0123	0.0098	0.0102
	0.0078	0.0087	0.0096	0.0107	0.0134	0.0134	0.0075	0.0122	0.0098	0.0102
	0.0078	0.0087	0.0096	0.0107	0.0134	0.0132	0.0075	0.0122	0.0098	0.0102
	0.0077	0.0087	0.0095	0.0106	0.0133	0.0132	0.0075	0.0122	0.0097	0.0102
	0.0077	0.0086	0.0095	0.0106	0.0132	0.0132	0.0074	0.0121	0.0097	0.0101
	0.0077	0.0086	0.0095	0.0106	0.0132	0.0132	0.0074	0.0121	0.0096	0.0101
	0.0077	0.0086	0.0095	0.0106	0.0132	0.0131	0.0073	0.0121	0.0096	0.0101
	0.0077	0.0086	0.0095	0.0106	0.0132	0.0131	0.0073	0.0121	0.0096	0.0101
	0.0076	0.0086	0.0094	0.0105	0.0131	0.0131	0.0073	0.0121	0.0096	0.0101
	0.0076	0.0085	0.0094	0.0105	0.0131	0.013	0.0073	0.0121	0.0096	0.0101
	0.0076	0.0085	0.0093	0.0105	0.0131	0.0129	0.0073	0.012	0.0096	0.01
	0.0075	0.0085	0.0093	0.0105	0.013	0.0129	0.0073	0.012	0.0095	0.01
	0.0075	0.0085	0.0093	0.0105	0.013	0.0129	0.0073	0.012	0.0095	0.01
	0.0075	0.0085	0.0093	0.0104	0.013	0.0129	0.0072	0.012	0.0094	0.01
	0.0075	0.0085	0.0093	0.0104	0.0129	0.0129	0.0072	0.0119	0.0094	0.0099
	0.0074	0.0084	0.0092	0.0104	0.0129	0.0128	0.0072	0.0119	0.0094	0.0099
	0.0074	0.0084	0.0092	0.0104	0.0129	0.0128	0.0072	0.0118	0.0094	0.0098
	0.0074	0.0084	0.0092	0.0104	0.0129	0.0128	0.0071	0.0118	0.0094	0.0098
	0.0073	0.0084	0.0092	0.0104	0.0128	0.0127	0.0071	0.0117	0.0094	0.0098
	0.0072	0.0083	0.0092	0.0103	0.0128	0.0126	0.0071	0.0117	0.0094	0.0097
	0.0072	0.0083	0.0091	0.0103	0.0128	0.0126	0.0071	0.0117	0.0093	0.0097
	0.0072	0.0083	0.0091	0.0103	0.0127	0.0125	0.007	0.0116	0.0093	0.0097
	0.0072	0.0083	0.0091	0.0103	0.0126	0.0125	0.007	0.0115	0.0093	0.0097
	0.0071	0.0083	0.0091	0.0103	0.0126	0.0125	0.007	0.0115	0.0093	0.0097
	0.0071	0.0083	0.009	0.0102	0.0125	0.0124	0.0069	0.0114	0.0093	0.0095
	0.0071	0.0083	0.009	0.0102	0.0125	0.0124	0.0069	0.0114	0.0092	0.0095
	0.0071	0.0083	0.009	0.0102	0.0125	0.0124	0.0068	0.0114	0.0092	0.0095
	0.0071	0.0083	0.0089	0.0101	0.0124	0.0124	0.0068	0.0113	0.0092	0.0095
	0.007	0.0082	0.0089	0.0101	0.0124	0.0124	0.0068	0.0113	0.0091	0.0095
	0.007	0.0082	0.0089	0.0101	0.0124	0.0124	0.0067	0.0112	0.0091	0.0095
	0.007	0.0082	0.0089	0.01	0.0124	0.0123	0.0066	0.0112	0.0091	0.0094
	0.0069	0.0082	0.0089	0.0099	0.0124	0.0123	0.0065	0.0112	0.0091	0.0094
	0.0069	0.0082	0.0088	0.0099	0.0124	0.0122	0.0065	0.0112	0.0091	0.0094
	0.0069	0.0082	0.0088	0.0099	0.0123	0.0122	0.0065	0.0112	0.0091	0.0094
	0.0069	0.0081	0.0088	0.0099	0.0123	0.0121	0.0065	0.0111	0.009	0.0093
	0.0069	0.0081	0.0087	0.0099	0.0123	0.0121	0.0065	0.0111	0.009	0.0093
	0.0069	0.008	0.0087	0.0098	0.0122	0.0121	0.0064	0.011	0.009	0.0093
	0.0069	0.008	0.0087	0.0098	0.0121	0.0121	0.0063	0.011	0.009	0.0092
	0.0069	0.008	0.0087	0.0098	0.0121	0.012	0.0063	0.011	0.009	0.0092
	0.0068	0.008	0.0087	0.0098	0.0121	0.012	0.0063	0.0109	0.0089	0.0092
	0.0068	0.008	0.0087	0.0098	0.0121	0.012	0.0063	0.0108	0.0089	0.0091
	0.0067	0.008	0.0087	0.0097	0.0121	0.012	0.0063	0.0108	0.0089	0.0091
	0.0067	0.008	0.0087	0.0097	0.0121	0.012	0.0062	0.0108	0.0088	0.0091
	0.0067	0.008	0.0087	0.0097	0.0121	0.0119	0.0062	0.0107	0.0088	0.009
	0.0067	0.008	0.0086	0.0097	0.0121	0.0119	0.0062	0.0107	0.0088	0.0089
	0.0066	0.0079	0.0086	0.0097	0.0121	0.0118	0.0062	0.0107	0.0088	0.0089
	0.0066	0.0079	0.0085	0.0096	0.012	0.0117	0.0062	0.0107	0.0088	0.0089
	0.0066	0.0079	0.0085	0.0096	0.012	0.0117	0.0062	0.0107	0.0088	0.0089
	0.0066	0.0079	0.0085	0.0096	0.012	0.0116	0.0062	0.0106	0.0088	0.0089
	0.0066	0.0078	0.0085	0.0096	0.012	0.0116	0.0061	0.0105	0.0088	0.0088
	0.0066	0.0078	0.0085	0.0096	0.0119	0.0116	0.0061	0.0105	0.0087	0.0088
	0.0066	0.0078	0.0084	0.0096	0.0119	0.0115	0.0061	0.0105	0.0087	0.0088
	0.0065	0.0078	0.0084	0.0096	0.0119	0.0115	0.0061	0.0105	0.0087	0.0088
	0.0065	0.0078	0.0084	0.0095	0.0119	0.0115	0.006	0.0105	0.0086	0.0088
	0.0065	0.0078	0.0084	0.0095	0.0119	0.0115	0.006	0.0105	0.0086	0.0088
	0.0064	0.0077	0.0084	0.0095	0.0119	0.0115	0.0059	0.0105	0.0086	0.0087
	0.0064	0.0077	0.0084	0.0094	0.0119	0.0114	0.0059	0.0104	0.0086	0.0087
	0.0064	0.0077	0.0083	0.0094	0.0118	0.0114	0.0059	0.0104	0.0086	0.0087
	0.0064	0.0077	0.0083	0.0094	0.0118	0.0114	0.0059	0.0103	0.0085	0.0087
	0.0064	0.0077	0.0082	0.0094	0.0117	0.0114	0.0059	0.0102	0.0085	0.0087
	0.0064	0.0077	0.0082	0.0093	0.0117	0.0114	0.0058	0.0102	0.0085	0.0086
	0.0064	0.0077	0.0082	0.0093	0.0116	0.0114	0.0058	0.0102	0.0085	0.0086
	0.0064	0.0077	0.0082	0.0093	0.0115	0.0114	0.0058	0.0101	0.0085	0.0086
	0.0064	0.0076	0.0082	0.0093	0.0115	0.0113	0.0058	0.0101	0.0085	0.0085
	0.0063	0.0076	0.0081	0.0093	0.0114	0.0113	0.0058	0.0101	0.0085	0.0085
	0.0063	0.0076	0.0081	0.0093	0.0114	0.0113	0.0058	0.0101	0.0085	0.0085
	0.0063	0.0076	0.008	0.0092	0.0113	0.0113	0.0058	0.01	0.0085	0.0084
	0.0063	0.0076	0.008	0.0092	0.0113	0.0112	0.0057	0.01	0.0084	0.0084
	0.0062	0.0076	0.008	0.0092	0.0113	0.0112	0.0057	0.0099	0.0084	0.0084
	0.0062	0.0076	0.008	0.0092	0.0112	0.0111	0.0057	0.0098	0.0084	0.0084
	0.0062	0.0076	0.008	0.0092	0.0112	0.0111	0.0057	0.0098	0.0084	0.0084
	0.0062	0.0076	0.008	0.0092	0.0111	0.0111	0.0057	0.0098	0.0083	0.0083
	0.0061	0.0075	0.008	0.0091	0.0111	0.0111	0.0057	0.0098	0.0083	0.0083
	0.0061	0.0075	0.008	0.0091	0.0111	0.0111	0.0057	0.0098	0.0083	0.0083
	0.0061	0.0074	0.0079	0.009	0.0111	0.011	0.0056	0.0097	0.0083	0.0083
	0.0061	0.0074	0.0079	0.009	0.0111	0.0109	0.0056	0.0097	0.0083	0.0083
	0.0061	0.0074	0.0079	0.009	0.011	0.0109	0.0056	0.0097	0.0083	0.0083
	0.0061	0.0074	0.0079	0.0089	0.011	0.0109	0.0056	0.0095	0.0082	0.0083
	0.0061	0.0074	0.0078	0.0089	0.011	0.0108	0.0056	0.0095	0.0082	0.0082
	0.006	0.0073	0.0078	0.0089	0.0109	0.0108	0.0056	0.0095	0.0082	0.0082
	0.006	0.0073	0.0078	0.0089	0.0109	0.0108	0.0056	0.0095	0.0082	0.0082
	0.006	0.0073	0.0078	0.0089	0.0109	0.0107	0.0055	0.0094	0.0082	0.0082
	0.0059	0.0072	0.0078	0.0088	0.0109	0.0107	0.0055	0.0094	0.0082	0.0082
	0.0059	0.0072	0.0078	0.0088	0.0108	0.0106	0.0055	0.0094	0.0082	0.0081
	0.0059	0.0072	0.0078	0.0088	0.0108	0.0106	0.0055	0.0093	0.0082	0.0081
	0.0059	0.0072	0.0077	0.0087	0.0108	0.0105	0.0055	0.0093	0.0082	0.008
	0.0059	0.0072	0.0077	0.0087	0.0108	0.0105	0.0055	0.0093	0.0082	0.008
	0.0058	0.0072	0.0077	0.0086	0.0108	0.0104	0.0055	0.0092	0.0082	0.008
	0.0058	0.0072	0.0077	0.0086	0.0108	0.0104	0.0055	0.0092	0.0081	0.008
	0.0058	0.0072	0.0077	0.0086	0.0107	0.0104	0.0054	0.0092	0.0081	0.008
	0.0058	0.0071	0.0077	0.0086	0.0107	0.0104	0.0054	0.0092	0.0081	0.008
	0.0057	0.0071	0.0077	0.0086	0.0107	0.0103	0.0054	0.0092	0.0081	0.0079
	0.0057	0.0071	0.0077	0.0086	0.0107	0.0103	0.0054	0.0091	0.008	0.0079
	0.0057	0.0071	0.0076	0.0086	0.0107	0.0103	0.0054	0.0091	0.008	0.0079
	0.0057	0.007	0.0076	0.0086	0.0107	0.0103	0.0053	0.0091	0.008	0.0078
	0.0056	0.007	0.0076	0.0085	0.0106	0.0102	0.0053	0.009	0.008	0.0078
	0.0056	0.007	0.0076	0.0085	0.0106	0.0102	0.0053	0.009	0.008	0.0078
	0.0056	0.007	0.0076	0.0085	0.0106	0.0102	0.0052	0.009	0.008	0.0078
	0.0055	0.007	0.0075	0.0085	0.0106	0.0101	0.0052	0.009	0.008	0.0078
	0.0055	0.0069	0.0075	0.0085	0.0105	0.0101	0.0052	0.009	0.008	0.0077
	0.0055	0.0069	0.0075	0.0085	0.0105	0.0101	0.0052	0.0089	0.0079	0.0077
	0.0055	0.0069	0.0075	0.0084	0.0105	0.0101	0.0052	0.0088	0.0079	0.0077
	0.0055	0.0069	0.0075	0.0084	0.0105	0.01	0.0052	0.0088	0.0079	0.0077
	0.0055	0.0069	0.0075	0.0084	0.0105	0.01	0.0052	0.0088	0.0079	0.0076
	0.0055	0.0068	0.0075	0.0084	0.0104	0.01	0.0051	0.0087	0.0079	0.0076
	0.0055	0.0068	0.0075	0.0084	0.0104	0.01	0.0051	0.0087	0.0079	0.0076
	0.0055	0.0068	0.0075	0.0084	0.0104	0.01	0.0051	0.0087	0.0079	0.0076
	0.0054	0.0068	0.0075	0.0084	0.0104	0.0099	0.0051	0.0086	0.0079	0.0076
	0.0054	0.0068	0.0074	0.0083	0.0104	0.0099	0.005	0.0086	0.0078	0.0075
	0.0054	0.0068	0.0074	0.0083	0.0104	0.0099	0.005	0.0086	0.0078	0.0075
	0.0054	0.0068	0.0074	0.0083	0.0104	0.0099	0.005	0.0086	0.0078	0.0075
	0.0054	0.0067	0.0073	0.0083	0.0103	0.0098	0.0049	0.0086	0.0078	0.0075
	0.0054	0.0067	0.0073	0.0083	0.0103	0.0098	0.0049	0.0086	0.0078	0.0075
	0.0053	0.0067	0.0073	0.0083	0.0102	0.0098	0.0049	0.0086	0.0078	0.0075
	0.0053	0.0067	0.0073	0.0083	0.0101	0.0098	0.0049	0.0086	0.0078	0.0074
	0.0053	0.0066	0.0073	0.0083	0.0101	0.0098	0.0049	0.0086	0.0078	0.0074
	0.0053	0.0066	0.0073	0.0083	0.0101	0.0097	0.0049	0.0085	0.0078	0.0074
	0.0053	0.0066	0.0072	0.0082	0.0101	0.0097	0.0049	0.0085	0.0077	0.0074
	0.0053	0.0066	0.0072	0.0082	0.01	0.0097	0.0049	0.0085	0.0077	0.0074
	0.0052	0.0066	0.0072	0.0081	0.01	0.0097	0.0048	0.0085	0.0077	0.0074
	0.0052	0.0066	0.0071	0.0081	0.01	0.0096	0.0048	0.0085	0.0077	0.0074
	0.0052	0.0066	0.0071	0.0081	0.01	0.0096	0.0048	0.0085	0.0077	0.0074
	0.0052	0.0066	0.0071	0.0081	0.01	0.0096	0.0048	0.0085	0.0077	0.0074
	0.0052	0.0066	0.0071	0.008	0.01	0.0095	0.0048	0.0085	0.0076	0.0073
	0.0051	0.0066	0.0071	0.008	0.01	0.0095	0.0047	0.0085	0.0076	0.0073
	0.0051	0.0066	0.007	0.0079	0.01	0.0094	0.0047	0.0084	0.0076	0.0073
	0.0051	0.0066	0.007	0.0079	0.01	0.0094	0.0047	0.0084	0.0076	0.0073
	0.0051	0.0066	0.007	0.0079	0.01	0.0094	0.0047	0.0084	0.0075	0.0072
	0.0051	0.0065	0.007	0.0079	0.0099	0.0094	0.0047	0.0084	0.0075	0.0072
	0.005	0.0065	0.007	0.0078	0.0099	0.0093	0.0047	0.0084	0.0075	0.0072
	0.005	0.0065	0.007	0.0078	0.0099	0.0093	0.0047	0.0083	0.0075	0.0072
	0.005	0.0065	0.007	0.0078	0.0099	0.0093	0.0047	0.0083	0.0075	0.0072
	0.005	0.0065	0.007	0.0077	0.0099	0.0092	0.0047	0.0083	0.0075	0.0071
	0.005	0.0065	0.0068	0.0077	0.0099	0.0092	0.0046	0.0083	0.0075	0.0071
	0.005	0.0065	0.0068	0.0077	0.0099	0.0092	0.0046	0.0083	0.0075	0.0071
	0.0049	0.0064	0.0068	0.0077	0.0098	0.0092	0.0046	0.0082	0.0074	0.0071
	0.0049	0.0064	0.0068	0.0077	0.0098	0.0091	0.0046	0.0082	0.0074	0.0071
	0.0049	0.0063	0.0068	0.0077	0.0098	0.009	0.0046	0.0082	0.0074	0.0071
	0.0049	0.0063	0.0068	0.0077	0.0098	0.009	0.0046	0.0082	0.0074	0.007
	0.0049	0.0063	0.0068	0.0077	0.0097	0.009	0.0046	0.0082	0.0074	0.007
	0.0049	0.0063	0.0067	0.0076	0.0096	0.009	0.0046	0.0082	0.0073	0.007
	0.0048	0.0063	0.0067	0.0076	0.0096	0.0089	0.0046	0.0082	0.0073	0.007
	0.0048	0.0063	0.0067	0.0076	0.0096	0.0089	0.0046	0.0081	0.0073	0.007
	0.0048	0.0063	0.0067	0.0076	0.0095	0.0089	0.0045	0.0081	0.0073	0.007
	0.0048	0.0063	0.0067	0.0076	0.0095	0.0089	0.0045	0.0081	0.0073	0.007
	0.0048	0.0063	0.0067	0.0076	0.0095	0.0088	0.0045	0.008	0.0073	0.0069
	0.0048	0.0063	0.0066	0.0076	0.0095	0.0088	0.0045	0.008	0.0072	0.0069
	0.0048	0.0063	0.0066	0.0075	0.0094	0.0088	0.0045	0.008	0.0072	0.0068
	0.0048	0.0063	0.0066	0.0075	0.0094	0.0088	0.0045	0.008	0.0072	0.0068
	0.0047	0.0062	0.0066	0.0075	0.0094	0.0087	0.0045	0.008	0.0072	0.0068
	0.0047	0.0062	0.0066	0.0075	0.0094	0.0087	0.0044	0.008	0.0072	0.0068
	0.0047	0.0062	0.0066	0.0075	0.0094	0.0086	0.0044	0.008	0.0072	0.0068
	0.0047	0.0062	0.0066	0.0075	0.0094	0.0086	0.0044	0.0079	0.0072	0.0068
	0.0047	0.0061	0.0066	0.0075	0.0094	0.0086	0.0044	0.0079	0.0072	0.0067
	0.0047	0.0061	0.0065	0.0075	0.0094	0.0086	0.0044	0.0078	0.0071	0.0067
	0.0047	0.0061	0.0065	0.0075	0.0093	0.0086	0.0044	0.0078	0.0071	0.0067
	0.0047	0.0061	0.0065	0.0075	0.0093	0.0085	0.0044	0.0078	0.0071	0.0067
	0.0047	0.0061	0.0065	0.0074	0.0093	0.0085	0.0044	0.0078	0.0071	0.0066
	0.0047	0.0061	0.0065	0.0074	0.0092	0.0085	0.0044	0.0078	0.0071	0.0066
	0.0046	0.0061	0.0065	0.0074	0.0092	0.0085	0.0043	0.0078	0.0071	0.0066
	0.0046	0.006	0.0064	0.0074	0.0092	0.0085	0.0043	0.0078	0.007	0.0066
	0.0046	0.006	0.0064	0.0074	0.0092	0.0084	0.0043	0.0078	0.007	0.0066
	0.0046	0.006	0.0064	0.0074	0.0092	0.0084	0.0043	0.0078	0.007	0.0066
	0.0046	0.0059	0.0064	0.0074	0.0092	0.0083	0.0043	0.0077	0.007	0.0066
	0.0045	0.0059	0.0064	0.0074	0.0092	0.0083	0.0043	0.0077	0.007	0.0065
	0.0045	0.0059	0.0064	0.0074	0.0092	0.0083	0.0042	0.0077	0.007	0.0065
	0.0045	0.0059	0.0064	0.0073	0.0091	0.0083	0.0042	0.0077	0.007	0.0065
	0.0045	0.0059	0.0064	0.0073	0.0091	0.0083	0.0042	0.0077	0.0069	0.0065
	0.0044	0.0059	0.0063	0.0073	0.0091	0.0082	0.0042	0.0076	0.0069	0.0065
	0.0044	0.0059	0.0063	0.0073	0.0091	0.0082	0.0042	0.0076	0.0069	0.0065
	0.0044	0.0059	0.0063	0.0073	0.0091	0.0081	0.0042	0.0076	0.0069	0.0065
	0.0044	0.0059	0.0063	0.0072	0.009	0.0081	0.0042	0.0076	0.0069	0.0064
	0.0043	0.0058	0.0063	0.0072	0.009	0.0081	0.0042	0.0076	0.0069	0.0064
	0.0043	0.0058	0.0063	0.0072	0.009	0.0081	0.0042	0.0076	0.0069	0.0064
	0.0043	0.0058	0.0063	0.0072	0.009	0.008	0.0042	0.0076	0.0069	0.0064
	0.0043	0.0058	0.0062	0.0072	0.009	0.008	0.0042	0.0076	0.0069	0.0064
	0.0043	0.0058	0.0062	0.0071	0.0089	0.008	0.0041	0.0076	0.0069	0.0064
	0.0043	0.0058	0.0062	0.0071	0.0089	0.008	0.0041	0.0076	0.0069	0.0064
	0.0043	0.0058	0.0062	0.0071	0.0089	0.008	0.0041	0.0075	0.0069	0.0064
	0.0042	0.0058	0.0062	0.0071	0.0088	0.0079	0.0041	0.0075	0.0068	0.0064
	0.0042	0.0057	0.0062	0.0071	0.0088	0.0079	0.0041	0.0075	0.0068	0.0063
	0.0042	0.0057	0.0062	0.0071	0.0088	0.0079	0.0041	0.0075	0.0068	0.0063
	0.0042	0.0057	0.0062	0.0071	0.0088	0.0079	0.004	0.0075	0.0068	0.0063
	0.0042	0.0057	0.0061	0.007	0.0088	0.0079	0.004	0.0074	0.0068	0.0063
	0.0042	0.0057	0.0061	0.007	0.0088	0.0079	0.004	0.0074	0.0067	0.0063
	0.0042	0.0056	0.0061	0.007	0.0087	0.0079	0.004	0.0074	0.0067	0.0062
	0.0042	0.0056	0.0061	0.007	0.0087	0.0079	0.004	0.0074	0.0067	0.0062
	0.0042	0.0055	0.0061	0.007	0.0087	0.0078	0.004	0.0074	0.0067	0.0062
	0.0042	0.0055	0.0061	0.007	0.0087	0.0078	0.004	0.0074	0.0067	0.0061
	0.0042	0.0055	0.0061	0.007	0.0087	0.0078	0.004	0.0073	0.0067	0.0061
	0.0042	0.0055	0.0061	0.007	0.0087	0.0078	0.004	0.0073	0.0067	0.0061
	0.0042	0.0055	0.0061	0.0069	0.0087	0.0078	0.004	0.0073	0.0067	0.0061
	0.0042	0.0055	0.0061	0.0069	0.0087	0.0077	0.004	0.0072	0.0067	0.0061
	0.0042	0.0055	0.006	0.0069	0.0086	0.0077	0.004	0.0072	0.0066	0.0061
	0.0041	0.0055	0.0059	0.0069	0.0086	0.0077	0.004	0.0072	0.0066	0.0061
	0.0041	0.0055	0.0059	0.0069	0.0086	0.0077	0.0039	0.0072	0.0066	0.006
	0.0041	0.0055	0.0059	0.0068	0.0085	0.0077	0.0039	0.0072	0.0066	0.006
	0.0041	0.0055	0.0059	0.0068	0.0085	0.0077	0.0039	0.0071	0.0066	0.006
	0.0041	0.0055	0.0059	0.0068	0.0085	0.0076	0.0039	0.0071	0.0066	0.006
	0.0041	0.0055	0.0059	0.0068	0.0085	0.0076	0.0039	0.0071	0.0066	0.006
	0.0041	0.0054	0.0059	0.0067	0.0085	0.0076	0.0039	0.0071	0.0066	0.0059
	0.004	0.0054	0.0059	0.0067	0.0085	0.0076	0.0038	0.0071	0.0066	0.0059
	0.004	0.0054	0.0059	0.0067	0.0085	0.0076	0.0038	0.0071	0.0066	0.0059
	0.004	0.0054	0.0058	0.0067	0.0084	0.0075	0.0038	0.0071	0.0065	0.0059
	0.004	0.0054	0.0058	0.0067	0.0084	0.0075	0.0038	0.0071	0.0065	0.0058
	0.004	0.0054	0.0058	0.0067	0.0084	0.0075	0.0038	0.007	0.0065	0.0058
	0.004	0.0054	0.0058	0.0066	0.0084	0.0075	0.0038	0.007	0.0065	0.0058
	0.004	0.0054	0.0058	0.0066	0.0083	0.0075	0.0038	0.007	0.0065	0.0058
	0.004	0.0054	0.0058	0.0066	0.0083	0.0074	0.0038	0.0069	0.0065	0.0058
	0.0039	0.0054	0.0058	0.0066	0.0083	0.0074	0.0038	0.0069	0.0065	0.0058
	0.0039	0.0054	0.0058	0.0066	0.0083	0.0074	0.0038	0.0069	0.0065	0.0058
	0.0039	0.0054	0.0058	0.0066	0.0083	0.0074	0.0037	0.0069	0.0065	0.0058
	0.0039	0.0054	0.0057	0.0066	0.0083	0.0074	0.0037	0.0069	0.0065	0.0057
	0.0039	0.0053	0.0057	0.0065	0.0082	0.0074	0.0037	0.0069	0.0065	0.0057
	0.0039	0.0053	0.0057	0.0065	0.0082	0.0073	0.0037	0.0069	0.0064	0.0057
	0.0039	0.0053	0.0057	0.0065	0.0082	0.0073	0.0037	0.0068	0.0064	0.0057
	0.0038	0.0053	0.0057	0.0065	0.0082	0.0073	0.0036	0.0068	0.0063	0.0057
	0.0038	0.0053	0.0057	0.0065	0.0082	0.0073	0.0036	0.0068	0.0063	0.0057
	0.0038	0.0053	0.0056	0.0065	0.0081	0.0073	0.0036	0.0068	0.0063	0.0057
	0.0038	0.0053	0.0056	0.0065	0.0081	0.0072	0.0036	0.0068	0.0063	0.0057
	0.0038	0.0053	0.0056	0.0065	0.0081	0.0072	0.0036	0.0068	0.0063	0.0057
	0.0038	0.0053	0.0056	0.0065	0.0081	0.0072	0.0036	0.0068	0.0063	0.0056
	0.0038	0.0052	0.0056	0.0065	0.0081	0.0072	0.0036	0.0068	0.0063	0.0056
	0.0038	0.0052	0.0056	0.0065	0.0081	0.0072	0.0036	0.0068	0.0062	0.0056
	0.0038	0.0052	0.0056	0.0064	0.0081	0.0072	0.0036	0.0067	0.0062	0.0056
	0.0037	0.0052	0.0056	0.0064	0.0081	0.0072	0.0036	0.0067	0.0062	0.0056
	0.0037	0.0052	0.0056	0.0064	0.0081	0.0072	0.0035	0.0067	0.0062	0.0056
	0.0037	0.0052	0.0056	0.0064	0.008	0.0072	0.0035	0.0067	0.0062	0.0056
	0.0037	0.0052	0.0055	0.0064	0.008	0.0071	0.0035	0.0067	0.0062	0.0055
	0.0037	0.0052	0.0055	0.0064	0.008	0.0071	0.0035	0.0066	0.0062	0.0055
	0.0036	0.0051	0.0055	0.0064	0.008	0.0071	0.0035	0.0066	0.0062	0.0055
	0.0036	0.0051	0.0055	0.0064	0.008	0.0071	0.0035	0.0066	0.0061	0.0055
	0.0036	0.0051	0.0055	0.0064	0.008	0.0071	0.0035	0.0066	0.0061	0.0055
	0.0036	0.0051	0.0055	0.0063	0.008	0.007	0.0035	0.0066	0.0061	0.0055
	0.0036	0.0051	0.0055	0.0063	0.008	0.007	0.0035	0.0065	0.0061	0.0055
	0.0036	0.0051	0.0055	0.0063	0.0079	0.007	0.0034	0.0065	0.0061	0.0054
	0.0036	0.0051	0.0055	0.0063	0.0079	0.007	0.0034	0.0065	0.0061	0.0054
	0.0036	0.0051	0.0055	0.0063	0.0079	0.0069	0.0034	0.0065	0.0061	0.0054
	0.0036	0.0051	0.0055	0.0063	0.0079	0.0069	0.0034	0.0065	0.0061	0.0054
	0.0036	0.0051	0.0054	0.0062	0.0079	0.0069	0.0034	0.0064	0.006	0.0054
	0.0036	0.005	0.0054	0.0062	0.0079	0.0069	0.0034	0.0064	0.006	0.0054
	0.0036	0.005	0.0054	0.0062	0.0079	0.0068	0.0034	0.0064	0.006	0.0054
	0.0036	0.005	0.0054	0.0062	0.0078	0.0068	0.0034	0.0064	0.006	0.0054
	0.0035	0.005	0.0054	0.0062	0.0078	0.0068	0.0034	0.0064	0.006	0.0054
	0.0035	0.005	0.0054	0.0062	0.0078	0.0068	0.0034	0.0064	0.006	0.0053
	0.0035	0.0049	0.0053	0.0062	0.0078	0.0068	0.0033	0.0064	0.006	0.0053
	0.0035	0.0049	0.0053	0.0062	0.0078	0.0068	0.0033	0.0064	0.006	0.0053
	0.0035	0.0049	0.0053	0.0061	0.0078	0.0068	0.0033	0.0064	0.0059	0.0053
	0.0035	0.0049	0.0052	0.0061	0.0078	0.0067	0.0033	0.0063	0.0059	0.0053
	0.0035	0.0049	0.0052	0.0061	0.0078	0.0067	0.0033	0.0063	0.0059	0.0053
	0.0035	0.0049	0.0052	0.0061	0.0078	0.0067	0.0033	0.0063	0.0059	0.0053
	0.0035	0.0049	0.0052	0.0061	0.0078	0.0067	0.0033	0.0063	0.0059	0.0053
	0.0034	0.0049	0.0052	0.0061	0.0077	0.0067	0.0033	0.0063	0.0059	0.0053
	0.0034	0.0049	0.0051	0.0061	0.0077	0.0066	0.0033	0.0063	0.0059	0.0053
	0.0034	0.0049	0.0051	0.0061	0.0077	0.0066	0.0033	0.0063	0.0059	0.0053
	0.0034	0.0048	0.0051	0.006	0.0077	0.0066	0.0032	0.0063	0.0059	0.0053
	0.0034	0.0048	0.0051	0.006	0.0076	0.0066	0.0032	0.0063	0.0058	0.0052
	0.0034	0.0048	0.0051	0.006	0.0076	0.0066	0.0032	0.0063	0.0058	0.0052
	0.0034	0.0048	0.0051	0.006	0.0076	0.0066	0.0032	0.0062	0.0058	0.0052
	0.0033	0.0048	0.005	0.006	0.0076	0.0065	0.0032	0.0062	0.0058	0.0052
	0.0033	0.0048	0.005	0.006	0.0076	0.0065	0.0032	0.0062	0.0058	0.0052
	0.0033	0.0048	0.005	0.006	0.0075	0.0065	0.0032	0.0062	0.0058	0.0052
	0.0033	0.0048	0.005	0.006	0.0075	0.0065	0.0032	0.0062	0.0058	0.0051
	0.0033	0.0048	0.005	0.006	0.0075	0.0065	0.0032	0.0062	0.0057	0.0051
	0.0033	0.0048	0.005	0.0059	0.0075	0.0065	0.0032	0.0061	0.0057	0.0051
	0.0033	0.0048	0.005	0.0059	0.0075	0.0064	0.0032	0.0061	0.0057	0.0051
	0.0033	0.0048	0.005	0.0059	0.0075	0.0064	0.0032	0.0061	0.0057	0.0051
	0.0032	0.0047	0.0049	0.0059	0.0075	0.0064	0.0031	0.0061	0.0057	0.0051
	0.0032	0.0047	0.0049	0.0059	0.0074	0.0063	0.0031	0.0061	0.0057	0.0051
	0.0032	0.0047	0.0049	0.0059	0.0074	0.0063	0.0031	0.0061	0.0057	0.0051
	0.0032	0.0047	0.0049	0.0059	0.0074	0.0063	0.0031	0.006	0.0057	0.0051
	0.0032	0.0047	0.0049	0.0059	0.0074	0.0063	0.0031	0.006	0.0057	0.0051
	0.0032	0.0047	0.0048	0.0059	0.0074	0.0062	0.0031	0.006	0.0056	0.005
	0.0032	0.0047	0.0048	0.0058	0.0074	0.0062	0.0031	0.006	0.0056	0.005
	0.0032	0.0047	0.0048	0.0058	0.0074	0.0062	0.0031	0.006	0.0056	0.005
	0.0031	0.0047	0.0048	0.0058	0.0074	0.0062	0.0031	0.006	0.0056	0.005
	0.0031	0.0047	0.0048	0.0058	0.0073	0.0062	0.0031	0.006	0.0056	0.005
	0.0031	0.0046	0.0048	0.0058	0.0073	0.0062	0.0031	0.0059	0.0056	0.0049
	0.0031	0.0046	0.0047	0.0058	0.0073	0.0061	0.0031	0.0059	0.0056	0.0049
	0.0031	0.0046	0.0047	0.0058	0.0072	0.0061	0.003	0.0059	0.0056	0.0049
	0.0031	0.0046	0.0047	0.0058	0.0072	0.0061	0.003	0.0059	0.0056	0.0049
	0.003	0.0046	0.0047	0.0058	0.0072	0.0061	0.003	0.0059	0.0056	0.0049
	0.003	0.0046	0.0047	0.0058	0.0072	0.0061	0.003	0.0059	0.0056	0.0049
	0.003	0.0046	0.0047	0.0057	0.0072	0.0061	0.003	0.0058	0.0055	0.0049
	0.003	0.0046	0.0046	0.0057	0.0071	0.0061	0.003	0.0058	0.0055	0.0048
	0.003	0.0045	0.0046	0.0057	0.0071	0.0061	0.003	0.0058	0.0055	0.0048
	0.003	0.0045	0.0046	0.0057	0.0071	0.0061	0.003	0.0058	0.0055	0.0048
	0.003	0.0045	0.0046	0.0057	0.0071	0.0061	0.003	0.0058	0.0055	0.0048
	0.003	0.0045	0.0046	0.0057	0.0071	0.0061	0.003	0.0057	0.0054	0.0048
	0.0029	0.0045	0.0046	0.0057	0.0071	0.0061	0.0029	0.0057	0.0054	0.0048
	0.0029	0.0045	0.0046	0.0056	0.0071	0.0061	0.0029	0.0057	0.0054	0.0048
	0.0029	0.0045	0.0046	0.0056	0.0071	0.006	0.0029	0.0057	0.0054	0.0048
	0.0029	0.0045	0.0045	0.0056	0.0071	0.006	0.0029	0.0057	0.0054	0.0047
	0.0029	0.0045	0.0045	0.0056	0.0071	0.006	0.0029	0.0057	0.0054	0.0047
	0.0029	0.0045	0.0045	0.0056	0.007	0.006	0.0029	0.0057	0.0054	0.0047
	0.0029	0.0045	0.0045	0.0056	0.007	0.006	0.0029	0.0057	0.0054	0.0047
	0.0029	0.0045	0.0045	0.0056	0.007	0.006	0.0029	0.0057	0.0054	0.0047
	0.0029	0.0044	0.0045	0.0056	0.007	0.006	0.0029	0.0057	0.0054	0.0047
	0.0028	0.0044	0.0045	0.0056	0.007	0.0059	0.0029	0.0056	0.0054	0.0047
	0.0028	0.0044	0.0045	0.0056	0.007	0.0059	0.0029	0.0056	0.0053	0.0047
	0.0028	0.0044	0.0045	0.0055	0.0069	0.0059	0.0029	0.0056	0.0053	0.0047
	0.0028	0.0044	0.0045	0.0055	0.0069	0.0059	0.0029	0.0056	0.0053	0.0047
	0.0028	0.0044	0.0045	0.0055	0.0069	0.0059	0.0029	0.0056	0.0053	0.0047
	0.0028	0.0044	0.0044	0.0055	0.0069	0.0059	0.0029	0.0056	0.0053	0.0047
	0.0028	0.0044	0.0044	0.0055	0.0069	0.0059	0.0028	0.0056	0.0053	0.0047
	0.0028	0.0044	0.0044	0.0055	0.0069	0.0058	0.0028	0.0056	0.0053	0.0046
	0.0028	0.0044	0.0044	0.0055	0.0069	0.0058	0.0028	0.0056	0.0053	0.0046
	0.0028	0.0044	0.0044	0.0055	0.0069	0.0058	0.0028	0.0055	0.0053	0.0046
	0.0028	0.0044	0.0044	0.0054	0.0068	0.0058	0.0028	0.0055	0.0053	0.0046
	0.0027	0.0044	0.0044	0.0054	0.0068	0.0058	0.0028	0.0055	0.0053	0.0046
	0.0027	0.0044	0.0044	0.0054	0.0068	0.0058	0.0028	0.0055	0.0053	0.0046
	0.0027	0.0044	0.0044	0.0054	0.0068	0.0057	0.0028	0.0055	0.0052	0.0046
	0.0027	0.0044	0.0044	0.0054	0.0068	0.0057	0.0028	0.0055	0.0052	0.0046
	0.0027	0.0044	0.0044	0.0054	0.0068	0.0057	0.0028	0.0055	0.0052	0.0046
	0.0027	0.0043	0.0044	0.0054	0.0068	0.0057	0.0028	0.0055	0.0052	0.0045
	0.0027	0.0043	0.0044	0.0054	0.0068	0.0056	0.0028	0.0055	0.0052	0.0045
	0.0027	0.0043	0.0044	0.0054	0.0067	0.0056	0.0028	0.0055	0.0052	0.0045
	0.0027	0.0043	0.0044	0.0053	0.0067	0.0056	0.0027	0.0055	0.0052	0.0045
	0.0027	0.0043	0.0043	0.0053	0.0067	0.0056	0.0027	0.0055	0.0052	0.0045
	0.0027	0.0043	0.0043	0.0053	0.0066	0.0056	0.0027	0.0055	0.0052	0.0044
	0.0026	0.0043	0.0043	0.0053	0.0066	0.0056	0.0027	0.0055	0.0052	0.0044
	0.0026	0.0043	0.0043	0.0053	0.0066	0.0056	0.0027	0.0055	0.0052	0.0044
	0.0026	0.0043	0.0043	0.0053	0.0066	0.0056	0.0027	0.0055	0.0052	0.0044
	0.0026	0.0043	0.0043	0.0053	0.0066	0.0055	0.0027	0.0054	0.0051	0.0044
	0.0026	0.0042	0.0042	0.0053	0.0066	0.0055	0.0027	0.0054	0.0051	0.0044
	0.0026	0.0042	0.0042	0.0053	0.0066	0.0055	0.0027	0.0054	0.0051	0.0044
	0.0026	0.0042	0.0042	0.0053	0.0066	0.0055	0.0027	0.0054	0.0051	0.0044
	0.0026	0.0042	0.0042	0.0053	0.0066	0.0055	0.0027	0.0054	0.0051	0.0044
	0.0026	0.0042	0.0042	0.0052	0.0065	0.0055	0.0026	0.0054	0.0051	0.0043
	0.0026	0.0042	0.0042	0.0052	0.0065	0.0055	0.0026	0.0054	0.0051	0.0043
	0.0025	0.0042	0.0042	0.0052	0.0065	0.0055	0.0026	0.0053	0.0051	0.0043
	0.0025	0.0042	0.0042	0.0052	0.0065	0.0055	0.0026	0.0053	0.0051	0.0043
	0.0025	0.0042	0.0042	0.0052	0.0065	0.0054	0.0026	0.0053	0.0051	0.0043
	0.0025	0.0042	0.0042	0.0052	0.0065	0.0054	0.0026	0.0053	0.0051	0.0043
	0.0025	0.0041	0.0041	0.0051	0.0064	0.0054	0.0026	0.0053	0.0051	0.0043
	0.0025	0.0041	0.0041	0.0051	0.0064	0.0054	0.0026	0.0053	0.0051	0.0043
	0.0024	0.0041	0.0041	0.0051	0.0064	0.0054	0.0026	0.0053	0.0051	0.0043
	0.0024	0.0041	0.0041	0.0051	0.0064	0.0054	0.0026	0.0053	0.0051	0.0043
	0.0024	0.0041	0.0041	0.0051	0.0064	0.0053	0.0025	0.0053	0.0051	0.0042
	0.0024	0.0041	0.0041	0.0051	0.0064	0.0053	0.0025	0.0053	0.0051	0.0042
	0.0024	0.0041	0.0041	0.0051	0.0064	0.0053	0.0025	0.0053	0.0051	0.0042
	0.0024	0.004	0.0041	0.0051	0.0064	0.0053	0.0025	0.0053	0.005	0.0042
	0.0024	0.004	0.0041	0.0051	0.0064	0.0053	0.0025	0.0053	0.005	0.0042
	0.0024	0.004	0.004	0.0051	0.0064	0.0053	0.0025	0.0053	0.005	0.0042
	0.0023	0.004	0.004	0.0051	0.0064	0.0053	0.0025	0.0052	0.005	0.0042
	0.0023	0.004	0.004	0.0051	0.0063	0.0053	0.0025	0.0052	0.005	0.0041
	0.0023	0.004	0.004	0.0051	0.0063	0.0053	0.0025	0.0052	0.005	0.0041
	0.0023	0.004	0.004	0.005	0.0063	0.0052	0.0025	0.0052	0.005	0.0041
	0.0023	0.004	0.004	0.005	0.0063	0.0052	0.0025	0.0052	0.005	0.0041
	0.0023	0.0039	0.004	0.005	0.0063	0.0052	0.0025	0.0052	0.005	0.0041
	0.0023	0.0039	0.004	0.005	0.0062	0.0052	0.0025	0.0052	0.005	0.0041
	0.0023	0.0039	0.004	0.005	0.0062	0.0052	0.0025	0.0052	0.005	0.0041
	0.0022	0.0039	0.004	0.005	0.0062	0.0052	0.0024	0.0052	0.005	0.0041
	0.0022	0.0039	0.0039	0.005	0.0062	0.0051	0.0024	0.0051	0.005	0.0041
	0.0022	0.0039	0.0039	0.005	0.0062	0.0051	0.0024	0.0051	0.0049	0.0041
	0.0021	0.0039	0.0039	0.0049	0.0062	0.0051	0.0024	0.0051	0.0049	0.0041
	0.0021	0.0039	0.0039	0.0049	0.0062	0.0051	0.0024	0.0051	0.0049	0.0041
	0.0021	0.0038	0.0039	0.0049	0.0061	0.0051	0.0024	0.0051	0.0049	0.0041
	0.0021	0.0038	0.0039	0.0049	0.0061	0.0051	0.0024	0.0051	0.0049	0.0041
	0.0021	0.0038	0.0039	0.0049	0.0061	0.0051	0.0024	0.0051	0.0049	0.0041
	0.0021	0.0038	0.0039	0.0049	0.0061	0.0051	0.0024	0.0051	0.0049	0.0041
	0.0021	0.0038	0.0039	0.0049	0.0061	0.0051	0.0024	0.0051	0.0049	0.0041
	0.0021	0.0038	0.0039	0.0049	0.0061	0.0051	0.0024	0.005	0.0049	0.0041
	0.0021	0.0038	0.0038	0.0049	0.0061	0.0051	0.0024	0.005	0.0049	0.004
	0.0021	0.0037	0.0038	0.0049	0.006	0.0051	0.0023	0.005	0.0048	0.004
	0.0021	0.0037	0.0038	0.0049	0.006	0.005	0.0023	0.005	0.0048	0.004
	0.0021	0.0037	0.0038	0.0048	0.006	0.005	0.0023	0.005	0.0048	0.004
	0.0021	0.0037	0.0038	0.0048	0.006	0.005	0.0023	0.005	0.0048	0.004
	0.002	0.0037	0.0038	0.0048	0.006	0.005	0.0023	0.005	0.0048	0.004
	0.002	0.0037	0.0038	0.0048	0.0059	0.005	0.0023	0.005	0.0048	0.004
	0.002	0.0037	0.0038	0.0048	0.0059	0.005	0.0023	0.005	0.0048	0.004
	0.002	0.0037	0.0038	0.0048	0.0059	0.005	0.0023	0.005	0.0048	0.004
	0.002	0.0037	0.0037	0.0048	0.0059	0.005	0.0023	0.005	0.0048	0.004
	0.0019	0.0037	0.0037	0.0048	0.0059	0.005	0.0023	0.0049	0.0048	0.004
	0.0019	0.0037	0.0037	0.0048	0.0059	0.0049	0.0023	0.0049	0.0048	0.004
	0.0019	0.0037	0.0037	0.0048	0.0059	0.0049	0.0023	0.0049	0.0047	0.004
	0.0019	0.0037	0.0037	0.0048	0.0059	0.0049	0.0023	0.0049	0.0047	0.004
	0.0019	0.0036	0.0037	0.0047	0.0059	0.0049	0.0022	0.0049	0.0047	0.004
	0.0019	0.0036	0.0037	0.0047	0.0058	0.0049	0.0022	0.0049	0.0047	0.004
	0.0019	0.0036	0.0037	0.0047	0.0058	0.0049	0.0022	0.0049	0.0047	0.0039
	0.0019	0.0036	0.0037	0.0047	0.0058	0.0049	0.0022	0.0049	0.0047	0.0039
	0.0019	0.0036	0.0037	0.0047	0.0058	0.0049	0.0022	0.0049	0.0047	0.0038
	0.0019	0.0036	0.0037	0.0047	0.0058	0.0048	0.0022	0.0048	0.0047	0.0038
	0.0019	0.0036	0.0037	0.0047	0.0058	0.0048	0.0022	0.0048	0.0047	0.0038
	0.0019	0.0036	0.0037	0.0047	0.0058	0.0048	0.0022	0.0048	0.0047	0.0038
	0.0019	0.0036	0.0037	0.0046	0.0058	0.0048	0.0022	0.0048	0.0047	0.0038
	0.0018	0.0035	0.0037	0.0046	0.0058	0.0048	0.0022	0.0048	0.0047	0.0038
	0.0018	0.0035	0.0037	0.0046	0.0057	0.0048	0.0022	0.0048	0.0047	0.0038
	0.0018	0.0035	0.0037	0.0046	0.0057	0.0048	0.0021	0.0048	0.0046	0.0038
	0.0018	0.0035	0.0037	0.0046	0.0057	0.0047	0.0021	0.0047	0.0046	0.0038
	0.0018	0.0035	0.0036	0.0046	0.0057	0.0047	0.0021	0.0047	0.0046	0.0038
	0.0018	0.0035	0.0036	0.0046	0.0057	0.0047	0.0021	0.0047	0.0046	0.0038
	0.0018	0.0035	0.0036	0.0046	0.0057	0.0047	0.0021	0.0047	0.0046	0.0038
	0.0018	0.0035	0.0036	0.0046	0.0057	0.0047	0.0021	0.0047	0.0045	0.0037
	0.0018	0.0035	0.0036	0.0046	0.0057	0.0047	0.0021	0.0047	0.0045	0.0037
	0.0018	0.0035	0.0036	0.0046	0.0057	0.0047	0.0021	0.0047	0.0045	0.0037
	0.0018	0.0035	0.0036	0.0045	0.0056	0.0047	0.0021	0.0047	0.0045	0.0037
	0.0018	0.0035	0.0036	0.0045	0.0056	0.0047	0.0021	0.0047	0.0045	0.0037
	0.0018	0.0035	0.0036	0.0045	0.0056	0.0047	0.0021	0.0047	0.0045	0.0037
	0.0018	0.0035	0.0035	0.0045	0.0056	0.0046	0.0021	0.0047	0.0044	0.0036
	0.0018	0.0034	0.0035	0.0045	0.0056	0.0046	0.0021	0.0047	0.0044	0.0036
	0.0018	0.0034	0.0035	0.0045	0.0056	0.0046	0.0021	0.0047	0.0044	0.0036
	0.0018	0.0034	0.0035	0.0045	0.0056	0.0046	0.0021	0.0047	0.0044	0.0036
	0.0018	0.0034	0.0035	0.0045	0.0056	0.0046	0.0021	0.0047	0.0044	0.0036
	0.0017	0.0034	0.0035	0.0045	0.0056	0.0046	0.0021	0.0046	0.0044	0.0036
	0.0017	0.0034	0.0035	0.0045	0.0056	0.0045	0.0021	0.0046	0.0044	0.0036
	0.0017	0.0034	0.0035	0.0045	0.0055	0.0045	0.002	0.0046	0.0044	0.0036
	0.0017	0.0034	0.0034	0.0045	0.0055	0.0045	0.002	0.0046	0.0044	0.0036
	0.0017	0.0034	0.0034	0.0045	0.0055	0.0045	0.002	0.0046	0.0044	0.0036
	0.0017	0.0034	0.0034	0.0044	0.0055	0.0045	0.002	0.0046	0.0044	0.0036
	0.0017	0.0034	0.0034	0.0044	0.0055	0.0045	0.002	0.0046	0.0044	0.0035
	0.0017	0.0034	0.0034	0.0044	0.0055	0.0045	0.002	0.0046	0.0044	0.0035
	0.0017	0.0034	0.0034	0.0044	0.0055	0.0045	0.002	0.0046	0.0044	0.0035
	0.0016	0.0034	0.0034	0.0044	0.0054	0.0045	0.002	0.0046	0.0044	0.0035
	0.0016	0.0034	0.0034	0.0043	0.0054	0.0045	0.002	0.0045	0.0044	0.0035
	0.0016	0.0033	0.0034	0.0043	0.0054	0.0045	0.0019	0.0045	0.0044	0.0035
	0.0016	0.0033	0.0034	0.0043	0.0054	0.0045	0.0019	0.0045	0.0043	0.0035
	0.0016	0.0033	0.0034	0.0043	0.0054	0.0045	0.0019	0.0045	0.0043	0.0035
	0.0016	0.0033	0.0034	0.0043	0.0054	0.0045	0.0019	0.0045	0.0043	0.0035
	0.0016	0.0033	0.0033	0.0043	0.0054	0.0045	0.0019	0.0045	0.0043	0.0035
	0.0016	0.0033	0.0033	0.0043	0.0054	0.0045	0.0019	0.0045	0.0043	0.0035
	0.0016	0.0033	0.0033	0.0043	0.0054	0.0045	0.0019	0.0045	0.0043	0.0035
	0.0016	0.0033	0.0033	0.0043	0.0054	0.0044	0.0019	0.0045	0.0043	0.0034
	0.0016	0.0033	0.0033	0.0043	0.0054	0.0044	0.0019	0.0045	0.0043	0.0034
	0.0016	0.0033	0.0033	0.0043	0.0054	0.0044	0.0019	0.0044	0.0043	0.0034
	0.0016	0.0033	0.0033	0.0043	0.0054	0.0044	0.0019	0.0044	0.0043	0.0034
	0.0015	0.0033	0.0033	0.0042	0.0054	0.0044	0.0019	0.0044	0.0043	0.0034
	0.0015	0.0033	0.0033	0.0042	0.0054	0.0044	0.0018	0.0044	0.0043	0.0034
	0.0015	0.0033	0.0033	0.0042	0.0053	0.0044	0.0018	0.0044	0.0043	0.0034
	0.0015	0.0032	0.0033	0.0042	0.0053	0.0044	0.0018	0.0044	0.0043	0.0034
	0.0015	0.0032	0.0033	0.0042	0.0053	0.0044	0.0018	0.0044	0.0043	0.0034
	0.0015	0.0032	0.0033	0.0042	0.0053	0.0044	0.0018	0.0044	0.0043	0.0034
	0.0015	0.0032	0.0032	0.0042	0.0053	0.0044	0.0018	0.0044	0.0043	0.0034
	0.0015	0.0032	0.0032	0.0042	0.0053	0.0043	0.0018	0.0044	0.0042	0.0033
	0.0015	0.0032	0.0032	0.0042	0.0053	0.0043	0.0018	0.0044	0.0042	0.0033
	0.0015	0.0032	0.0032	0.0042	0.0053	0.0043	0.0018	0.0044	0.0042	0.0033
	0.0015	0.0032	0.0032	0.0042	0.0053	0.0043	0.0018	0.0043	0.0042	0.0033
	0.0015	0.0032	0.0032	0.0042	0.0053	0.0043	0.0018	0.0043	0.0042	0.0033
	0.0014	0.0032	0.0032	0.0042	0.0053	0.0043	0.0018	0.0043	0.0042	0.0033
	0.0014	0.0032	0.0032	0.0042	0.0053	0.0043	0.0018	0.0043	0.0042	0.0033
	0.0014	0.0032	0.0032	0.0041	0.0052	0.0043	0.0018	0.0043	0.0042	0.0033
	0.0014	0.0031	0.0032	0.0041	0.0052	0.0043	0.0018	0.0043	0.0042	0.0033
	0.0014	0.0031	0.0032	0.0041	0.0052	0.0043	0.0017	0.0043	0.0042	0.0033
	0.0014	0.0031	0.0032	0.0041	0.0052	0.0043	0.0017	0.0043	0.0042	0.0033
	0.0014	0.0031	0.0032	0.0041	0.0052	0.0043	0.0017	0.0043	0.0042	0.0033
	0.0014	0.0031	0.0032	0.0041	0.0052	0.0043	0.0017	0.0042	0.0042	0.0033
	0.0014	0.0031	0.0031	0.0041	0.0052	0.0042	0.0017	0.0042	0.0042	0.0033
	0.0014	0.0031	0.0031	0.0041	0.0051	0.0042	0.0017	0.0042	0.0041	0.0032
	0.0014	0.0031	0.0031	0.0041	0.0051	0.0042	0.0017	0.0042	0.0041	0.0032
	0.0014	0.0031	0.0031	0.0041	0.0051	0.0042	0.0017	0.0042	0.0041	0.0032
	0.0014	0.0031	0.0031	0.0041	0.0051	0.0042	0.0017	0.0042	0.0041	0.0032
	0.0014	0.0031	0.0031	0.0041	0.0051	0.0042	0.0017	0.0042	0.0041	0.0032
	0.0013	0.0031	0.0031	0.004	0.0051	0.0042	0.0017	0.0042	0.0041	0.0032
	0.0013	0.003	0.0031	0.004	0.0051	0.0041	0.0017	0.0042	0.0041	0.0032
	0.0013	0.003	0.0031	0.004	0.0051	0.0041	0.0017	0.0042	0.0041	0.0032
	0.0013	0.003	0.0031	0.004	0.0051	0.0041	0.0017	0.0042	0.0041	0.0032
	0.0013	0.003	0.0031	0.004	0.0051	0.0041	0.0016	0.0042	0.0041	0.0032
	0.0013	0.003	0.003	0.004	0.0051	0.0041	0.0016	0.0042	0.0041	0.0031
	0.0013	0.003	0.003	0.004	0.0051	0.0041	0.0016	0.0042	0.004	0.0031
	0.0013	0.003	0.003	0.0039	0.0051	0.0041	0.0016	0.0042	0.004	0.0031
	0.0013	0.003	0.003	0.0039	0.0051	0.0041	0.0016	0.0041	0.004	0.0031
	0.0013	0.003	0.003	0.0039	0.0051	0.0041	0.0016	0.0041	0.004	0.0031
	0.0013	0.003	0.003	0.0039	0.0051	0.0041	0.0016	0.0041	0.004	0.0031
	0.0013	0.003	0.003	0.0039	0.0051	0.0041	0.0016	0.0041	0.004	0.0031
	0.0012	0.003	0.003	0.0039	0.0051	0.004	0.0016	0.0041	0.004	0.0031
	0.0012	0.0029	0.003	0.0039	0.0051	0.004	0.0016	0.0041	0.004	0.0031
	0.0012	0.0029	0.003	0.0039	0.005	0.004	0.0016	0.0041	0.004	0.0031
	0.0012	0.0029	0.003	0.0039	0.005	0.004	0.0016	0.0041	0.004	0.0031
	0.0012	0.0029	0.003	0.0039	0.005	0.004	0.0016	0.0041	0.004	0.0031
	0.0012	0.0029	0.0029	0.0038	0.005	0.004	0.0016	0.0041	0.004	0.0031
	0.0012	0.0029	0.0029	0.0038	0.005	0.004	0.0016	0.0041	0.004	0.0031
	0.0012	0.0029	0.0029	0.0038	0.005	0.0039	0.0015	0.0041	0.004	0.0031
	0.0012	0.0029	0.0029	0.0038	0.005	0.0039	0.0015	0.0041	0.004	0.0031
	0.0011	0.0029	0.0029	0.0038	0.005	0.0039	0.0015	0.0041	0.0039	0.003
	0.0011	0.0029	0.0029	0.0038	0.005	0.0039	0.0015	0.0041	0.0039	0.003
	0.0011	0.0029	0.0029	0.0038	0.005	0.0039	0.0015	0.0041	0.0039	0.003
	0.0011	0.0029	0.0029	0.0038	0.005	0.0039	0.0015	0.0041	0.0039	0.003
	0.0011	0.0029	0.0029	0.0038	0.005	0.0039	0.0015	0.0041	0.0039	0.003
	0.0011	0.0029	0.0029	0.0038	0.0049	0.0039	0.0015	0.004	0.0039	0.003
	0.0011	0.0029	0.0028	0.0038	0.0049	0.0039	0.0015	0.004	0.0039	0.003
	0.0011	0.0029	0.0028	0.0038	0.0049	0.0039	0.0015	0.004	0.0039	0.003
	0.0011	0.0028	0.0028	0.0038	0.0049	0.0039	0.0015	0.004	0.0039	0.003
	0.0011	0.0028	0.0028	0.0038	0.0049	0.0039	0.0015	0.004	0.0039	0.003
	0.0011	0.0028	0.0028	0.0038	0.0049	0.0039	0.0015	0.004	0.0039	0.003
	0.001	0.0028	0.0028	0.0038	0.0049	0.0039	0.0014	0.004	0.0039	0.0029
	0.001	0.0028	0.0027	0.0037	0.0049	0.0039	0.0014	0.004	0.0038	0.0029
	0.001	0.0028	0.0027	0.0037	0.0049	0.0039	0.0014	0.004	0.0038	0.0029
	0.001	0.0028	0.0027	0.0037	0.0049	0.0038	0.0014	0.004	0.0038	0.0029
	0.001	0.0028	0.0027	0.0037	0.0049	0.0038	0.0014	0.004	0.0038	0.0029
	0.001	0.0028	0.0027	0.0037	0.0049	0.0038	0.0014	0.004	0.0038	0.0029
	0.001	0.0028	0.0027	0.0037	0.0049	0.0038	0.0014	0.004	0.0038	0.0029
	0.001	0.0028	0.0027	0.0037	0.0049	0.0038	0.0014	0.0039	0.0038	0.0029
	0.001	0.0028	0.0027	0.0037	0.0049	0.0038	0.0014	0.0039	0.0038	0.0029
	0.001	0.0028	0.0027	0.0037	0.0049	0.0038	0.0014	0.0039	0.0038	0.0029
	0.0009	0.0028	0.0027	0.0036	0.0048	0.0038	0.0014	0.0039	0.0038	0.0029
	0.0009	0.0028	0.0027	0.0036	0.0048	0.0038	0.0014	0.0039	0.0038	0.0029
	0.0009	0.0028	0.0026	0.0036	0.0048	0.0038	0.0014	0.0039	0.0038	0.0029
	0.0009	0.0028	0.0026	0.0036	0.0048	0.0038	0.0014	0.0038	0.0038	0.0028
	0.0009	0.0028	0.0026	0.0036	0.0048	0.0038	0.0014	0.0038	0.0038	0.0028
	0.0009	0.0028	0.0026	0.0036	0.0048	0.0038	0.0014	0.0038	0.0037	0.0028
	0.0009	0.0028	0.0026	0.0036	0.0048	0.0037	0.0014	0.0038	0.0037	0.0028
	0.0009	0.0027	0.0026	0.0036	0.0048	0.0037	0.0013	0.0038	0.0037	0.0028
	0.0008	0.0027	0.0026	0.0036	0.0048	0.0037	0.0013	0.0038	0.0037	0.0028
	0.0008	0.0027	0.0026	0.0036	0.0048	0.0037	0.0013	0.0038	0.0037	0.0028
	0.0008	0.0027	0.0026	0.0036	0.0048	0.0037	0.0013	0.0038	0.0037	0.0028
	0.0008	0.0027	0.0025	0.0036	0.0048	0.0037	0.0013	0.0038	0.0037	0.0028
	0.0008	0.0027	0.0025	0.0036	0.0048	0.0037	0.0013	0.0038	0.0037	0.0028
	0.0008	0.0027	0.0025	0.0036	0.0048	0.0037	0.0013	0.0038	0.0037	0.0028
	0.0008	0.0027	0.0025	0.0036	0.0048	0.0037	0.0013	0.0038	0.0037	0.0028
	0.0008	0.0027	0.0025	0.0036	0.0048	0.0037	0.0013	0.0038	0.0037	0.0028
	0.0008	0.0027	0.0025	0.0036	0.0048	0.0037	0.0013	0.0038	0.0037	0.0028
	0.0008	0.0027	0.0025	0.0036	0.0047	0.0037	0.0012	0.0038	0.0036	0.0028
	0.0008	0.0027	0.0025	0.0036	0.0047	0.0037	0.0012	0.0037	0.0036	0.0028
	0.0008	0.0027	0.0025	0.0036	0.0047	0.0037	0.0012	0.0037	0.0036	0.0028
	0.0008	0.0026	0.0025	0.0035	0.0047	0.0036	0.0012	0.0037	0.0036	0.0028
	0.0008	0.0026	0.0024	0.0035	0.0047	0.0036	0.0012	0.0037	0.0036	0.0028
	0.0008	0.0026	0.0024	0.0035	0.0047	0.0036	0.0012	0.0037	0.0036	0.0027
	0.0008	0.0026	0.0024	0.0035	0.0047	0.0036	0.0012	0.0037	0.0036	0.0027
	0.0007	0.0026	0.0024	0.0035	0.0047	0.0036	0.0012	0.0037	0.0036	0.0027
	0.0007	0.0026	0.0024	0.0035	0.0047	0.0035	0.0012	0.0037	0.0036	0.0027
	0.0007	0.0026	0.0024	0.0035	0.0046	0.0035	0.0012	0.0037	0.0036	0.0027
	0.0007	0.0026	0.0024	0.0035	0.0046	0.0035	0.0012	0.0037	0.0036	0.0027
	0.0007	0.0026	0.0024	0.0035	0.0046	0.0035	0.0012	0.0037	0.0036	0.0027
	0.0007	0.0026	0.0024	0.0035	0.0046	0.0035	0.0012	0.0037	0.0035	0.0027
	0.0007	0.0026	0.0024	0.0035	0.0046	0.0035	0.0012	0.0037	0.0035	0.0027
	0.0007	0.0025	0.0024	0.0035	0.0046	0.0035	0.0012	0.0037	0.0035	0.0027
	0.0007	0.0025	0.0024	0.0035	0.0046	0.0035	0.0012	0.0037	0.0035	0.0027
	0.0007	0.0025	0.0024	0.0035	0.0046	0.0035	0.0012	0.0036	0.0035	0.0027
	0.0007	0.0025	0.0024	0.0035	0.0046	0.0035	0.0011	0.0036	0.0035	0.0026
	0.0007	0.0025	0.0024	0.0035	0.0045	0.0034	0.0011	0.0036	0.0035	0.0026
	0.0007	0.0025	0.0023	0.0035	0.0045	0.0034	0.0011	0.0036	0.0035	0.0026
	0.0007	0.0025	0.0023	0.0034	0.0045	0.0034	0.0011	0.0036	0.0035	0.0026
	0.0007	0.0025	0.0023	0.0034	0.0045	0.0034	0.0011	0.0036	0.0035	0.0026
	0.0007	0.0025	0.0023	0.0034	0.0045	0.0034	0.0011	0.0036	0.0035	0.0026
	0.0006	0.0025	0.0023	0.0034	0.0044	0.0034	0.0011	0.0036	0.0035	0.0026
	0.0006	0.0025	0.0023	0.0034	0.0044	0.0034	0.0011	0.0036	0.0035	0.0026
	0.0006	0.0024	0.0023	0.0034	0.0044	0.0034	0.0011	0.0036	0.0035	0.0026
	0.0006	0.0024	0.0023	0.0034	0.0044	0.0034	0.0011	0.0035	0.0035	0.0026
	0.0006	0.0024	0.0023	0.0034	0.0044	0.0034	0.0011	0.0035	0.0035	0.0025
	0.0006	0.0024	0.0023	0.0034	0.0044	0.0034	0.0011	0.0035	0.0035	0.0025
	0.0006	0.0024	0.0023	0.0034	0.0044	0.0034	0.0011	0.0035	0.0035	0.0025
	0.0006	0.0024	0.0023	0.0034	0.0044	0.0034	0.0011	0.0035	0.0035	0.0025
	0.0006	0.0024	0.0023	0.0034	0.0044	0.0033	0.0011	0.0035	0.0035	0.0025
	0.0006	0.0024	0.0023	0.0034	0.0044	0.0033	0.001	0.0035	0.0035	0.0025
	0.0006	0.0024	0.0022	0.0034	0.0044	0.0033	0.001	0.0035	0.0035	0.0025
	0.0006	0.0024	0.0022	0.0033	0.0044	0.0033	0.001	0.0035	0.0035	0.0025
	0.0006	0.0024	0.0022	0.0033	0.0044	0.0033	0.001	0.0035	0.0035	0.0025
	0.0005	0.0024	0.0022	0.0033	0.0043	0.0033	0.001	0.0035	0.0034	0.0025
	0.0005	0.0024	0.0022	0.0033	0.0043	0.0033	0.001	0.0034	0.0034	0.0025
	0.0005	0.0023	0.0022	0.0033	0.0043	0.0033	0.001	0.0034	0.0034	0.0025
	0.0005	0.0023	0.0022	0.0033	0.0043	0.0033	0.001	0.0034	0.0034	0.0025
	0.0005	0.0023	0.0022	0.0033	0.0043	0.0033	0.001	0.0034	0.0034	0.0025
	0.0004	0.0023	0.0022	0.0033	0.0043	0.0033	0.001	0.0034	0.0034	0.0025
	0.0004	0.0023	0.0022	0.0033	0.0043	0.0033	0.001	0.0034	0.0034	0.0025
	0.0004	0.0023	0.0021	0.0033	0.0043	0.0032	0.001	0.0034	0.0034	0.0025
	0.0004	0.0023	0.0021	0.0033	0.0043	0.0032	0.001	0.0034	0.0034	0.0025
	0.0004	0.0023	0.0021	0.0032	0.0043	0.0032	0.0009	0.0034	0.0034	0.0025
	0.0004	0.0023	0.0021	0.0032	0.0043	0.0032	0.0009	0.0034	0.0034	0.0024
	0.0004	0.0023	0.0021	0.0032	0.0043	0.0032	0.0009	0.0034	0.0034	0.0024
	0.0003	0.0023	0.0021	0.0032	0.0043	0.0032	0.0009	0.0034	0.0034	0.0024
	0.0003	0.0023	0.0021	0.0032	0.0042	0.0032	0.0009	0.0034	0.0034	0.0024
	0.0003	0.0023	0.0021	0.0032	0.0042	0.0032	0.0009	0.0034	0.0034	0.0024
	0.0003	0.0023	0.0021	0.0032	0.0042	0.0032	0.0009	0.0034	0.0034	0.0024
	0.0003	0.0022	0.0021	0.0032	0.0042	0.0032	0.0009	0.0033	0.0034	0.0024
	0.0003	0.0022	0.0021	0.0032	0.0042	0.0032	0.0009	0.0033	0.0034	0.0024
	0.0003	0.0022	0.0021	0.0032	0.0042	0.0031	0.0009	0.0033	0.0034	0.0024
	0.0003	0.0022	0.002	0.0032	0.0042	0.0031	0.0009	0.0033	0.0034	0.0024
	0.0003	0.0022	0.002	0.0032	0.0042	0.0031	0.0009	0.0033	0.0033	0.0024
	0.0002	0.0022	0.002	0.0032	0.0042	0.0031	0.0008	0.0033	0.0033	0.0024
	0.0002	0.0021	0.002	0.0032	0.0042	0.0031	0.0008	0.0033	0.0033	0.0024
	0.0002	0.0021	0.002	0.0032	0.0042	0.0031	0.0008	0.0033	0.0033	0.0023
	0.0002	0.0021	0.002	0.0031	0.0041	0.0031	0.0008	0.0033	0.0033	0.0023
	0.0002	0.0021	0.002	0.0031	0.0041	0.0031	0.0008	0.0033	0.0033	0.0023
	0.0002	0.0021	0.002	0.0031	0.0041	0.0031	0.0008	0.0033	0.0033	0.0023
	0.0002	0.0021	0.0019	0.0031	0.0041	0.0031	0.0008	0.0033	0.0033	0.0023
		0.0021	0.0019	0.0031	0.0041	0.0031	0.0008	0.0033	0.0033	0.0023
		0.0021	0.0019	0.0031	0.0041	0.0031	0.0008	0.0033	0.0033	0.0023
		0.0021	0.0019	0.0031	0.0041	0.0031	0.0008	0.0032	0.0033	0.0023
		0.0021	0.0019	0.0031	0.0041	0.0031	0.0008	0.0032	0.0033	0.0023
		0.0021	0.0019	0.0031	0.0041	0.0031	0.0007	0.0032	0.0033	0.0023
		0.0021	0.0019	0.0031	0.0041	0.0031	0.0007	0.0032	0.0033	0.0023
		0.0021	0.0019	0.0031	0.0041	0.0031	0.0007	0.0032	0.0033	0.0023
		0.002	0.0019	0.0031	0.0041	0.0031	0.0007	0.0032	0.0033	0.0023
		0.002	0.0019	0.0031	0.0041	0.0031	0.0007	0.0032	0.0033	0.0023
		0.002	0.0019	0.0031	0.0041	0.0031	0.0007	0.0032	0.0032	0.0022
		0.002	0.0019	0.0031	0.0041	0.003	0.0007	0.0032	0.0032	0.0022
		0.002	0.0019	0.003	0.0041	0.003	0.0007	0.0032	0.0032	0.0022
		0.002	0.0019	0.003	0.004	0.003	0.0007	0.0031	0.0032	0.0022
		0.002	0.0019	0.003	0.004	0.003	0.0007	0.0031	0.0032	0.0022
		0.002	0.0019	0.003	0.004	0.003	0.0007	0.0031	0.0032	0.0022
		0.002	0.0019	0.003	0.004	0.003	0.0007	0.0031	0.0032	0.0022
		0.002	0.0019	0.003	0.004	0.003	0.0007	0.0031	0.0032	0.0022
		0.002	0.0019	0.003	0.004	0.003	0.0007	0.0031	0.0032	0.0022
		0.002	0.0018	0.003	0.004	0.003	0.0007	0.0031	0.0032	0.0022
		0.002	0.0018	0.003	0.004	0.003	0.0007	0.0031	0.0032	0.0022
		0.002	0.0018	0.003	0.004	0.003	0.0006	0.0031	0.0031	0.0022
		0.002	0.0018	0.003	0.004	0.003	0.0006	0.0031	0.0031	0.0022
		0.002	0.0018	0.003	0.004	0.003	0.0006	0.0031	0.0031	0.0021
		0.002	0.0018	0.003	0.004	0.003	0.0006	0.0031	0.0031	0.0021
		0.0019	0.0018	0.003	0.0039	0.003	0.0006	0.003	0.0031	0.0021
		0.0019	0.0018	0.003	0.0039	0.003	0.0006	0.003	0.0031	0.0021
		0.0019	0.0018	0.003	0.0039	0.003	0.0006	0.003	0.0031	0.0021
		0.0019	0.0018	0.003	0.0039	0.003	0.0006	0.003	0.0031	0.0021
		0.0019	0.0018	0.003	0.0039	0.003	0.0006	0.003	0.0031	0.0021
		0.0019	0.0018	0.003	0.0039	0.0029	0.0006	0.003	0.0031	0.0021
		0.0019	0.0018	0.003	0.0039	0.0029	0.0006	0.003	0.0031	0.0021
		0.0019	0.0017	0.003	0.0039	0.0029	0.0006	0.003	0.0031	0.0021
		0.0019	0.0017	0.003	0.0039	0.0029	0.0006	0.003	0.0031	0.0021
		0.0019	0.0017	0.003	0.0039	0.0029	0.0006	0.003	0.0031	0.0021
		0.0019	0.0017	0.0029	0.0039	0.0029	0.0006	0.003	0.0031	0.0021
		0.0018	0.0017	0.0029	0.0039	0.0029	0.0006	0.003	0.0031	0.0021
		0.0018	0.0017	0.0029	0.0039	0.0029	0.0005	0.003	0.003	0.0021
		0.0018	0.0017	0.0029	0.0039	0.0029	0.0005	0.003	0.003	0.0021
		0.0018	0.0017	0.0029	0.0039	0.0029	0.0005	0.003	0.003	0.0021
		0.0018	0.0017	0.0029	0.0039	0.0029	0.0005	0.003	0.003	0.0021
		0.0018	0.0017	0.0029	0.0039	0.0029	0.0005	0.0029	0.003	0.002
		0.0018	0.0017	0.0029	0.0039	0.0029	0.0005	0.0029	0.003	0.002
		0.0018	0.0017	0.0029	0.0038	0.0029	0.0005	0.0029	0.003	0.002
		0.0018	0.0017	0.0029	0.0038	0.0028	0.0005	0.0029	0.003	0.002
		0.0017	0.0017	0.0029	0.0038	0.0028	0.0004	0.0029	0.003	0.002
		0.0017	0.0017	0.0029	0.0038	0.0028	0.0004	0.0029	0.003	0.002
		0.0017	0.0017	0.0029	0.0038	0.0028	0.0004	0.0029	0.003	0.002
		0.0017	0.0016	0.0029	0.0038	0.0028	0.0004	0.0029	0.003	0.002
		0.0017	0.0016	0.0029	0.0038	0.0028	0.0004	0.0029	0.003	0.002
		0.0017	0.0016	0.0029	0.0038	0.0028	0.0004	0.0029	0.0029	0.002
		0.0017	0.0016	0.0029	0.0038	0.0028	0.0004	0.0029	0.0029	0.002
		0.0017	0.0016	0.0029	0.0038	0.0028	0.0004	0.0029	0.0029	0.002
		0.0017	0.0016	0.0029	0.0038	0.0028	0.0003	0.0029	0.0029	0.002
		0.0017	0.0016	0.0029	0.0038	0.0028	0.0003	0.0029	0.0029	0.002
		0.0017	0.0016	0.0028	0.0038	0.0028	0.0003	0.0029	0.0029	0.002
		0.0017	0.0016	0.0028	0.0038	0.0028	0.0003	0.0029	0.0029	0.002
		0.0016	0.0016	0.0028	0.0038	0.0028	0.0003	0.0029	0.0029	0.0019
		0.0016	0.0016	0.0028	0.0038	0.0028	0.0003	0.0029	0.0029	0.0019
		0.0016	0.0016	0.0028	0.0038	0.0027	0.0003	0.0029	0.0029	0.0019
		0.0016	0.0016	0.0028	0.0037	0.0027	0.0003	0.0029	0.0029	0.0019
		0.0016	0.0016	0.0028	0.0037	0.0027	0.0003	0.0029	0.0029	0.0019
		0.0016	0.0016	0.0028	0.0037	0.0027	0.0003	0.0029	0.0029	0.0019
		0.0016	0.0015	0.0028	0.0037	0.0027	0.0002	0.0029	0.0029	0.0019
		0.0016	0.0015	0.0028	0.0037	0.0027	0.0002	0.0029	0.0028	0.0019
		0.0016	0.0015	0.0028	0.0037	0.0027	0.0002	0.0029	0.0028	0.0019
		0.0016	0.0015	0.0028	0.0037	0.0027	0.0002	0.0029	0.0028	0.0019
		0.0016	0.0015	0.0028	0.0037	0.0027	0.0002	0.0029	0.0028	0.0019
		0.0016	0.0015	0.0028	0.0037	0.0027	0.0002	0.0029	0.0028	0.0019
		0.0016	0.0015	0.0028	0.0037	0.0027	0.0002	0.0029	0.0028	0.0019
		0.0016	0.0015	0.0028	0.0037	0.0027	0.0002	0.0028	0.0028	0.0019
		0.0016	0.0015	0.0028	0.0037	0.0027	0.0002	0.0028	0.0028	0.0018
		0.0016	0.0015	0.0028	0.0037	0.0027		0.0028	0.0028	0.0018
		0.0016	0.0015	0.0028	0.0037	0.0027		0.0028	0.0028	0.0018
		0.0016	0.0015	0.0028	0.0037	0.0026		0.0028	0.0028	0.0018
		0.0016	0.0015	0.0028	0.0037	0.0026		0.0028	0.0028	0.0018
		0.0015	0.0014	0.0028	0.0037	0.0026		0.0028	0.0028	0.0018
		0.0015	0.0014	0.0028	0.0037	0.0026		0.0028	0.0028	0.0018
		0.0015	0.0014	0.0027	0.0037	0.0026		0.0028	0.0027	0.0018
		0.0015	0.0014	0.0027	0.0037	0.0026		0.0028	0.0027	0.0018
		0.0015	0.0014	0.0027	0.0036	0.0026		0.0028	0.0027	0.0018
		0.0015	0.0014	0.0027	0.0036	0.0026		0.0028	0.0027	0.0018
		0.0015	0.0014	0.0027	0.0036	0.0026		0.0028	0.0027	0.0018
		0.0015	0.0014	0.0027	0.0036	0.0026		0.0028	0.0027	0.0018
		0.0015	0.0014	0.0027	0.0036	0.0025		0.0028	0.0027	0.0018
		0.0015	0.0014	0.0027	0.0036	0.0025		0.0028	0.0027	0.0018
		0.0015	0.0013	0.0027	0.0036	0.0025		0.0028	0.0027	0.0018
		0.0015	0.0013	0.0027	0.0036	0.0025		0.0028	0.0027	0.0018
		0.0015	0.0013	0.0027	0.0036	0.0025		0.0028	0.0026	0.0018
		0.0015	0.0013	0.0027	0.0036	0.0025		0.0027	0.0026	0.0018
		0.0015	0.0013	0.0027	0.0036	0.0025		0.0027	0.0026	0.0017
		0.0014	0.0013	0.0027	0.0036	0.0025		0.0027	0.0026	0.0017
		0.0014	0.0013	0.0027	0.0035	0.0025		0.0027	0.0026	0.0017
		0.0014	0.0013	0.0027	0.0035	0.0025		0.0027	0.0026	0.0017
		0.0014	0.0013	0.0027	0.0035	0.0025		0.0027	0.0026	0.0017
		0.0014	0.0013	0.0027	0.0035	0.0025		0.0027	0.0026	0.0017
		0.0014	0.0013	0.0027	0.0035	0.0025		0.0027	0.0026	0.0017
		0.0014	0.0013	0.0027	0.0035	0.0025		0.0027	0.0026	0.0017
		0.0014	0.0013	0.0027	0.0035	0.0025		0.0027	0.0026	0.0017
		0.0014	0.0013	0.0027	0.0035	0.0025		0.0027	0.0026	0.0017
		0.0014	0.0013	0.0026	0.0035	0.0025		0.0027	0.0026	0.0017
		0.0014	0.0013	0.0026	0.0035	0.0025		0.0027	0.0026	0.0017
		0.0014	0.0013	0.0026	0.0035	0.0025		0.0027	0.0026	0.0017
		0.0014	0.0013	0.0026	0.0035	0.0024		0.0027	0.0026	0.0017
		0.0014	0.0013	0.0026	0.0035	0.0024		0.0027	0.0026	0.0017
		0.0014	0.0013	0.0026	0.0035	0.0024		0.0027	0.0026	0.0017
		0.0014	0.0012	0.0026	0.0035	0.0024		0.0027	0.0026	0.0017
		0.0014	0.0012	0.0026	0.0034	0.0024		0.0027	0.0026	0.0016
		0.0014	0.0012	0.0026	0.0034	0.0024		0.0027	0.0026	0.0016
		0.0014	0.0012	0.0026	0.0034	0.0024		0.0027	0.0025	0.0016
		0.0013	0.0012	0.0026	0.0034	0.0024		0.0027	0.0025	0.0016
		0.0013	0.0012	0.0026	0.0034	0.0024		0.0027	0.0025	0.0016
		0.0013	0.0012	0.0026	0.0034	0.0024		0.0027	0.0025	0.0016
		0.0013	0.0012	0.0026	0.0034	0.0024		0.0026	0.0025	0.0016
		0.0013	0.0012	0.0025	0.0034	0.0024		0.0026	0.0025	0.0016
		0.0013	0.0012	0.0025	0.0034	0.0024		0.0026	0.0025	0.0016
		0.0013	0.0012	0.0025	0.0034	0.0024		0.0026	0.0025	0.0016
		0.0013	0.0012	0.0025	0.0034	0.0024		0.0026	0.0025	0.0016
		0.0013	0.0012	0.0025	0.0034	0.0024		0.0026	0.0025	0.0016
		0.0013	0.0012	0.0025	0.0034	0.0023		0.0026	0.0025	0.0016
		0.0013	0.0012	0.0025	0.0034	0.0023		0.0026	0.0024	0.0016
		0.0013	0.0012	0.0025	0.0034	0.0023		0.0026	0.0024	0.0016
		0.0013	0.0011	0.0025	0.0034	0.0023		0.0026	0.0024	0.0016
		0.0013	0.0011	0.0025	0.0034	0.0023		0.0026	0.0024	0.0016
		0.0013	0.0011	0.0025	0.0034	0.0023		0.0026	0.0024	0.0015
		0.0013	0.0011	0.0025	0.0034	0.0023		0.0026	0.0024	0.0015
		0.0012	0.0011	0.0025	0.0034	0.0023		0.0026	0.0024	0.0015
		0.0012	0.0011	0.0025	0.0033	0.0023		0.0026	0.0024	0.0015
		0.0012	0.0011	0.0025	0.0033	0.0023		0.0026	0.0024	0.0015
		0.0012	0.0011	0.0025	0.0033	0.0023		0.0026	0.0024	0.0015
		0.0012	0.0011	0.0025	0.0033	0.0023		0.0025	0.0024	0.0015
		0.0012	0.0011	0.0025	0.0033	0.0023		0.0025	0.0024	0.0015
		0.0012	0.0011	0.0025	0.0033	0.0023		0.0025	0.0024	0.0015
		0.0012	0.0011	0.0025	0.0033	0.0022		0.0025	0.0024	0.0015
		0.0012	0.0011	0.0025	0.0033	0.0022		0.0025	0.0024	0.0015
		0.0012	0.0011	0.0025	0.0033	0.0022		0.0025	0.0024	0.0015
		0.0012	0.001	0.0025	0.0033	0.0022		0.0025	0.0024	0.0015
		0.0012	0.001	0.0025	0.0033	0.0022		0.0025	0.0024	0.0015
		0.0012	0.001	0.0025	0.0033	0.0022		0.0025	0.0024	0.0015
		0.0012	0.001	0.0025	0.0033	0.0022		0.0025	0.0023	0.0015
		0.0012	0.001	0.0025	0.0033	0.0022		0.0025	0.0023	0.0015
		0.0012	0.001	0.0024	0.0033	0.0022		0.0025	0.0023	0.0015
		0.0012	0.001	0.0024	0.0033	0.0022		0.0025	0.0023	0.0015
		0.0012	0.001	0.0024	0.0033	0.0022		0.0025	0.0023	0.0014
		0.0011	0.001	0.0024	0.0033	0.0022		0.0025	0.0023	0.0014
		0.0011	0.001	0.0024	0.0033	0.0022		0.0025	0.0023	0.0014
		0.0011	0.001	0.0024	0.0033	0.0021		0.0025	0.0023	0.0014
		0.0011	0.001	0.0024	0.0032	0.0021		0.0025	0.0023	0.0014
		0.0011	0.0009	0.0024	0.0032	0.0021		0.0025	0.0023	0.0014
		0.0011	0.0009	0.0024	0.0032	0.0021		0.0025	0.0023	0.0014
		0.0011	0.0009	0.0024	0.0032	0.0021		0.0025	0.0023	0.0014
		0.0011	0.0009	0.0024	0.0032	0.0021		0.0025	0.0023	0.0014
		0.0011	0.0009	0.0024	0.0032	0.0021		0.0025	0.0023	0.0014
		0.0011	0.0009	0.0024	0.0032	0.0021		0.0024	0.0023	0.0014
		0.0011	0.0009	0.0024	0.0032	0.0021		0.0024	0.0023	0.0014
		0.0011	0.0009	0.0024	0.0032	0.0021		0.0024	0.0023	0.0014
		0.0011	0.0008	0.0024	0.0032	0.002		0.0024	0.0023	0.0014
		0.0011	0.0008	0.0024	0.0032	0.002		0.0024	0.0023	0.0014
		0.001	0.0008	0.0024	0.0032	0.002		0.0024	0.0023	0.0014
		0.001	0.0008	0.0024	0.0032	0.002		0.0024	0.0022	0.0013
		0.001	0.0008	0.0024	0.0032	0.002		0.0024	0.0022	0.0013
		0.001	0.0008	0.0023	0.0031	0.002		0.0024	0.0022	0.0013
		0.001	0.0008	0.0023	0.0031	0.002		0.0024	0.0022	0.0013
		0.001	0.0008	0.0023	0.0031	0.002		0.0024	0.0022	0.0013
		0.001	0.0007	0.0023	0.0031	0.002		0.0024	0.0022	0.0013
		0.001	0.0007	0.0023	0.0031	0.002		0.0024	0.0022	0.0013
		0.001	0.0007	0.0023	0.0031	0.002		0.0024	0.0022	0.0013
		0.001	0.0007	0.0023	0.0031	0.002		0.0024	0.0022	0.0013
		0.001	0.0007	0.0023	0.0031	0.002		0.0024	0.0022	0.0013
		0.001	0.0007	0.0023	0.0031	0.0019		0.0024	0.0022	0.0013
		0.001	0.0007	0.0023	0.0031	0.0019		0.0024	0.0022	0.0013
		0.001	0.0007	0.0023	0.0031	0.0019		0.0024	0.0022	0.0013
		0.001	0.0006	0.0023	0.0031	0.0019		0.0024	0.0022	0.0013
		0.001	0.0006	0.0023	0.0031	0.0019		0.0023	0.0022	0.0013
		0.001	0.0006	0.0023	0.0031	0.0019		0.0023	0.0022	0.0013
		0.001	0.0006	0.0023	0.0031	0.0019		0.0023	0.0022	0.0013
		0.0009	0.0006	0.0023	0.0031	0.0019		0.0023	0.0022	0.0013
		0.0009	0.0006	0.0022	0.0031	0.0019		0.0023	0.0022	0.0012
		0.0009	0.0005	0.0022	0.0031	0.0019		0.0023	0.0022	0.0012
		0.0009	0.0005	0.0022	0.003	0.0019		0.0023	0.0022	0.0012
		0.0009	0.0005	0.0022	0.003	0.0019		0.0023	0.0021	0.0012
		0.0008	0.0005	0.0022	0.003	0.0019		0.0023	0.0021	0.0012
		0.0008	0.0005	0.0022	0.003	0.0019		0.0023	0.0021	0.0012
		0.0008	0.0005	0.0022	0.003	0.0019		0.0023	0.0021	0.0012
		0.0008	0.0005	0.0022	0.003	0.0018		0.0023	0.0021	0.0012
		0.0008	0.0005	0.0022	0.003	0.0018		0.0023	0.0021	0.0012
		0.0008	0.0005	0.0022	0.003	0.0018		0.0023	0.0021	0.0012
		0.0008	0.0004	0.0022	0.003	0.0018		0.0023	0.0021	0.0012
		0.0008	0.0004	0.0022	0.003	0.0018		0.0023	0.0021	0.0012
		0.0008	0.0004	0.0022	0.003	0.0018		0.0023	0.0021	0.0012
		0.0008	0.0004	0.0022	0.003	0.0018		0.0023	0.0021	0.0012
		0.0008	0.0004	0.0022	0.003	0.0018		0.0023	0.0021	0.0012
		0.0008	0.0004	0.0022	0.003	0.0018		0.0023	0.0021	0.0012
		0.0008	0.0003	0.0022	0.003	0.0018		0.0022	0.0021	0.0012
		0.0008	0.0003	0.0021	0.003	0.0018		0.0022	0.0021	0.0012
		0.0008	0.0003	0.0021	0.003	0.0018		0.0022	0.0021	0.0012
		0.0007	0.0002	0.0021	0.0029	0.0018		0.0022	0.0021	0.0012
		0.0007	0.0002	0.0021	0.0029	0.0018		0.0022	0.0021	0.0012
		0.0007	0.0002	0.0021	0.0029	0.0018		0.0022	0.0021	0.0012
		0.0007	0.0002	0.0021	0.0029	0.0018		0.0022	0.0021	0.0011
		0.0007	0.0002	0.0021	0.0029	0.0018		0.0022	0.0021	0.0011
		0.0007	0.0002	0.0021	0.0029	0.0018		0.0022	0.0021	0.0011
		0.0007	0.0002	0.0021	0.0029	0.0018		0.0022	0.0021	0.0011
		0.0007	0.0002	0.0021	0.0029	0.0018		0.0022	0.0021	0.0011
		0.0007	0.0002	0.0021	0.0029	0.0018		0.0022	0.002	0.0011
		0.0007		0.0021	0.0029	0.0018		0.0022	0.002	0.0011
		0.0007		0.0021	0.0029	0.0017		0.0022	0.002	0.0011
		0.0006		0.0021	0.0029	0.0017		0.0022	0.002	0.0011
		0.0006		0.0021	0.0029	0.0017		0.0022	0.002	0.0011
		0.0006		0.002	0.0029	0.0017		0.0022	0.002	0.0011
		0.0006		0.002	0.0029	0.0017		0.0022	0.002	0.0011
		0.0006		0.002	0.0028	0.0017		0.0021	0.002	0.0011
		0.0006		0.002	0.0028	0.0017		0.0021	0.002	0.0011
		0.0006		0.002	0.0028	0.0017		0.0021	0.002	0.0011
		0.0006		0.002	0.0028	0.0017		0.0021	0.002	0.0011
		0.0005		0.002	0.0028	0.0017		0.0021	0.002	0.0011
		0.0005		0.002	0.0028	0.0017		0.0021	0.002	0.0011
		0.0005		0.002	0.0028	0.0017		0.0021	0.0019	0.0011
		0.0005		0.002	0.0028	0.0017		0.0021	0.0019	0.0011
		0.0005		0.002	0.0028	0.0017		0.0021	0.0019	0.0011
		0.0005		0.002	0.0028	0.0017		0.0021	0.0019	0.0011
		0.0005		0.002	0.0028	0.0017		0.0021	0.0019	0.0011
		0.0004		0.002	0.0028	0.0017		0.0021	0.0019	0.0011
		0.0004		0.002	0.0028	0.0017		0.0021	0.0019	0.0011
		0.0004		0.002	0.0028	0.0017		0.0021	0.0019	0.0011
		0.0004		0.002	0.0028	0.0017		0.002	0.0019	0.0011
		0.0004		0.002	0.0028	0.0017		0.002	0.0019	0.0011
		0.0004		0.002	0.0028	0.0016		0.002	0.0019	0.0011
		0.0004		0.002	0.0028	0.0016		0.002	0.0019	0.0011
		0.0004		0.002	0.0028	0.0016		0.002	0.0019	0.001
		0.0004		0.002	0.0028	0.0016		0.002	0.0019	0.001
		0.0004		0.0019	0.0028	0.0016		0.002	0.0019	0.001
		0.0004		0.0019	0.0028	0.0016		0.002	0.0019	0.001
		0.0003		0.0019	0.0028	0.0016		0.002	0.0019	0.001
		0.0003		0.0019	0.0028	0.0016		0.002	0.0019	0.001
		0.0003		0.0019	0.0028	0.0016		0.002	0.0019	0.001
		0.0003		0.0019	0.0027	0.0016		0.002	0.0018	0.001
		0.0003		0.0019	0.0027	0.0016		0.002	0.0018	0.0009
		0.0003		0.0019	0.0027	0.0016		0.002	0.0018	0.0009
		0.0003		0.0019	0.0027	0.0016		0.0019	0.0018	0.0009
		0.0003		0.0019	0.0027	0.0016		0.0019	0.0018	0.0009
		0.0003		0.0019	0.0027	0.0016		0.0019	0.0018	0.0009
		0.0003		0.0019	0.0027	0.0016		0.0019	0.0018	0.0009
		0.0003		0.0019	0.0027	0.0016		0.0019	0.0018	0.0009
		0.0003		0.0019	0.0027	0.0016		0.0019	0.0018	0.0009
		0.0002		0.0019	0.0027	0.0016		0.0019	0.0018	0.0009
		0.0002		0.0019	0.0027	0.0016		0.0019	0.0018	0.0009
		0.0002		0.0019	0.0027	0.0016		0.0019	0.0018	0.0009
		0.0002		0.0019	0.0027	0.0016		0.0019	0.0018	0.0009
		0.0002		0.0019	0.0027	0.0016		0.0019	0.0018	0.0009
		0.0002		0.0018	0.0027	0.0016		0.0019	0.0018	0.0009
		0.0002		0.0018	0.0027	0.0015		0.0019	0.0018	0.0009
		0.0002		0.0018	0.0027	0.0015		0.0019	0.0017	0.0009
		0.0002		0.0018	0.0027	0.0015		0.0019	0.0017	0.0008
		0.0002		0.0018	0.0027	0.0015		0.0019	0.0017	0.0008
		0.0002		0.0018	0.0027	0.0015		0.0019	0.0017	0.0008
		0.0002		0.0018	0.0026	0.0015		0.0019	0.0017	0.0008
				0.0018	0.0026	0.0015		0.0018	0.0017	0.0008
				0.0018	0.0026	0.0015		0.0018	0.0017	0.0008
				0.0018	0.0026	0.0015		0.0018	0.0017	0.0008
				0.0018	0.0026	0.0015		0.0018	0.0017	0.0008
				0.0018	0.0026	0.0015		0.0018	0.0017	0.0008
				0.0018	0.0026	0.0015		0.0018	0.0017	0.0008
				0.0018	0.0026	0.0015		0.0018	0.0017	0.0008
				0.0018	0.0026	0.0014		0.0018	0.0017	0.0008
				0.0018	0.0026	0.0014		0.0018	0.0017	0.0008
				0.0018	0.0026	0.0014		0.0018	0.0017	0.0008
				0.0018	0.0026	0.0014		0.0018	0.0017	0.0008
				0.0018	0.0026	0.0014		0.0018	0.0017	0.0007
				0.0018	0.0025	0.0014		0.0018	0.0017	0.0007
				0.0018	0.0025	0.0014		0.0018	0.0017	0.0007
				0.0018	0.0025	0.0014		0.0017	0.0017	0.0007
				0.0018	0.0025	0.0014		0.0017	0.0017	0.0007
				0.0018	0.0025	0.0013		0.0017	0.0016	0.0007
				0.0018	0.0025	0.0013		0.0017	0.0016	0.0007
				0.0017	0.0025	0.0013		0.0017	0.0016	0.0007
				0.0017	0.0025	0.0013		0.0017	0.0016	0.0007
				0.0017	0.0025	0.0013		0.0017	0.0016	0.0007
				0.0017	0.0025	0.0013		0.0017	0.0016	0.0007
				0.0017	0.0025	0.0013		0.0017	0.0016	0.0007
				0.0017	0.0024	0.0013		0.0017	0.0016	0.0007
				0.0017	0.0024	0.0013		0.0017	0.0016	0.0007
				0.0017	0.0024	0.0013		0.0017	0.0016	0.0006
				0.0017	0.0024	0.0013		0.0017	0.0016	0.0006
				0.0017	0.0024	0.0013		0.0017	0.0016	0.0006
				0.0017	0.0024	0.0012		0.0017	0.0015	0.0006
				0.0017	0.0024	0.0012		0.0017	0.0015	0.0006
				0.0017	0.0024	0.0012		0.0017	0.0015	0.0006
				0.0016	0.0024	0.0012		0.0017	0.0015	0.0006
				0.0016	0.0024	0.0012		0.0016	0.0015	0.0006
				0.0016	0.0024	0.0012		0.0016	0.0015	0.0006
				0.0016	0.0024	0.0012		0.0016	0.0015	0.0006
				0.0016	0.0023	0.0012		0.0016	0.0015	0.0005
				0.0016	0.0023	0.0012		0.0016	0.0015	0.0005
				0.0016	0.0023	0.0012		0.0016	0.0015	0.0005
				0.0016	0.0023	0.0012		0.0016	0.0015	0.0005
				0.0016	0.0023	0.0012		0.0016	0.0015	0.0005
				0.0016	0.0023	0.0012		0.0016	0.0015	0.0005
				0.0016	0.0023	0.0012		0.0016	0.0015	0.0005
				0.0016	0.0023	0.0012		0.0016	0.0015	0.0005
				0.0016	0.0023	0.0012		0.0016	0.0015	0.0005
				0.0016	0.0023	0.0012		0.0016	0.0015	0.0005
				0.0015	0.0023	0.0012		0.0016	0.0015	0.0005
				0.0015	0.0023	0.0012		0.0016	0.0015	0.0005
				0.0015	0.0023	0.0012		0.0016	0.0015	0.0005
				0.0015	0.0023	0.0011		0.0016	0.0014	0.0005
				0.0015	0.0023	0.0011		0.0016	0.0014	0.0005
				0.0015	0.0023	0.0011		0.0016	0.0014	0.0005
				0.0015	0.0023	0.0011		0.0015	0.0014	0.0005
				0.0015	0.0023	0.0011		0.0015	0.0014	0.0005
				0.0015	0.0022	0.0011		0.0015	0.0014	0.0005
				0.0015	0.0022	0.0011		0.0015	0.0014	0.0005
				0.0015	0.0022	0.0011		0.0015	0.0014	0.0004
				0.0015	0.0022	0.0011		0.0015	0.0014	0.0004
				0.0015	0.0022	0.0011		0.0015	0.0014	0.0004
				0.0015	0.0022	0.0011		0.0015	0.0014	0.0004
				0.0015	0.0022	0.0011		0.0015	0.0014	0.0004
				0.0015	0.0022	0.0011		0.0015	0.0014	0.0004
				0.0015	0.0022	0.0011		0.0015	0.0014	0.0004
				0.0015	0.0022	0.001		0.0015	0.0014	0.0004
				0.0015	0.0022	0.001		0.0015	0.0014	0.0004
				0.0015	0.0022	0.001		0.0015	0.0014	0.0004
				0.0015	0.0021	0.001		0.0015	0.0014	0.0004
				0.0015	0.0021	0.001		0.0015	0.0014	0.0004
				0.0015	0.0021	0.001		0.0015	0.0014	0.0004
				0.0015	0.0021	0.001		0.0015	0.0014	0.0004
				0.0015	0.0021	0.001		0.0014	0.0014	0.0004
				0.0015	0.0021	0.001		0.0014	0.0013	0.0004
				0.0015	0.0021	0.001		0.0014	0.0013	0.0003
				0.0014	0.0021	0.001		0.0014	0.0013	0.0003
				0.0014	0.0021	0.001		0.0014	0.0013	0.0003
				0.0014	0.0021	0.001		0.0014	0.0013	0.0003
				0.0014	0.0021	0.001		0.0014	0.0013	0.0003
				0.0014	0.0021	0.001		0.0014	0.0013	0.0003
				0.0014	0.0021	0.001		0.0014	0.0013	0.0003
				0.0014	0.0021	0.001		0.0014	0.0013	0.0003
				0.0014	0.0021	0.001		0.0014	0.0013	0.0003
				0.0014	0.0021	0.001		0.0014	0.0013	0.0003
				0.0014	0.0021	0.001		0.0014	0.0013	0.0003
				0.0014	0.002	0.0009		0.0014	0.0013	0.0003
				0.0014	0.002	0.0009		0.0014	0.0013	0.0003
				0.0014	0.002	0.0009		0.0014	0.0013	0.0002
				0.0014	0.002	0.0009		0.0014	0.0013	0.0002
				0.0014	0.002	0.0009		0.0014	0.0013	0.0002
				0.0014	0.002	0.0009		0.0014	0.0012	0.0002
				0.0014	0.002	0.0009		0.0014	0.0012	0.0002
				0.0014	0.002	0.0009		0.0014	0.0012	0.0002
				0.0014	0.002	0.0009		0.0013	0.0012	0.0002
				0.0013	0.002	0.0009		0.0013	0.0012	0.0002
				0.0013	0.002	0.0009		0.0013	0.0012	0.0002
				0.0013	0.002	0.0009		0.0013	0.0012	0.0002
				0.0013	0.002	0.0009		0.0013	0.0012
				0.0013	0.002	0.0009		0.0013	0.0012
				0.0013	0.0019	0.0009		0.0013	0.0012
				0.0013	0.0019	0.0009		0.0013	0.0012
				0.0013	0.0019	0.0008		0.0013	0.0012
				0.0013	0.0019	0.0008		0.0013	0.0012
				0.0013	0.0019	0.0008		0.0013	0.0012
				0.0013	0.0019	0.0008		0.0013	0.0012
				0.0013	0.0019	0.0008		0.0013	0.0012
				0.0013	0.0019	0.0008		0.0013	0.0012
				0.0013	0.0019	0.0008		0.0012	0.0012
				0.0013	0.0019	0.0008		0.0012	0.0012
				0.0013	0.0019	0.0008		0.0012	0.0012
				0.0013	0.0019	0.0008		0.0012	0.0012
				0.0013	0.0019	0.0008		0.0012	0.0012
				0.0013	0.0019	0.0008		0.0012	0.0012
				0.0013	0.0019	0.0008		0.0012	0.0012
				0.0013	0.0019	0.0008		0.0012	0.0012
				0.0012	0.0019	0.0008		0.0012	0.0012
				0.0012	0.0019	0.0008		0.0012	0.0012
				0.0012	0.0019	0.0008		0.0012	0.0012
				0.0012	0.0019	0.0007		0.0012	0.0012
				0.0012	0.0019	0.0007		0.0012	0.0011
				0.0012	0.0019	0.0007		0.0012	0.0011
				0.0012	0.0019	0.0007		0.0012	0.0011
				0.0012	0.0018	0.0007		0.0012	0.0011
				0.0012	0.0018	0.0007		0.0012	0.0011
				0.0012	0.0018	0.0007		0.0012	0.0011
				0.0012	0.0018	0.0007		0.0012	0.0011
				0.0012	0.0018	0.0007		0.0012	0.0011
				0.0012	0.0018	0.0007		0.0012	0.0011
				0.0012	0.0018	0.0007		0.0012	0.0011
				0.0012	0.0018	0.0007		0.0011	0.0011
				0.0012	0.0018	0.0007		0.0011	0.0011
				0.0012	0.0017	0.0007		0.0011	0.0011
				0.0012	0.0017	0.0006		0.0011	0.0011
				0.0012	0.0017	0.0006		0.0011	0.001
				0.0012	0.0017	0.0006		0.0011	0.001
				0.0011	0.0017	0.0006		0.0011	0.001
				0.0011	0.0017	0.0006		0.0011	0.001
				0.0011	0.0017	0.0006		0.0011	0.001
				0.0011	0.0017	0.0006		0.0011	0.001
				0.0011	0.0017	0.0006		0.0011	0.001
				0.0011	0.0017	0.0006		0.0011	0.001
				0.0011	0.0017	0.0006		0.0011	0.001
				0.0011	0.0017	0.0005		0.0011	0.001
				0.0011	0.0017	0.0005		0.0011	0.001
				0.001	0.0017	0.0005		0.0011	0.001
				0.001	0.0017	0.0005		0.0011	0.001
				0.001	0.0017	0.0005		0.0011	0.001
				0.001	0.0017	0.0005		0.0011	0.001
				0.001	0.0017	0.0005		0.0011	0.001
				0.001	0.0017	0.0005		0.0011	0.0009
				0.001	0.0017	0.0005		0.001	0.0009
				0.001	0.0017	0.0005		0.001	0.0009
				0.001	0.0017	0.0005		0.001	0.0009
				0.001	0.0017	0.0004		0.001	0.0009
				0.001	0.0017	0.0004		0.001	0.0009
				0.001	0.0017	0.0004		0.001	0.0009
				0.001	0.0017	0.0004		0.001	0.0009
				0.001	0.0016	0.0004		0.001	0.0009
				0.001	0.0016	0.0004		0.001	0.0009
				0.001	0.0016	0.0004		0.001	0.0009
				0.001	0.0016	0.0004		0.001	0.0009
				0.001	0.0016	0.0004		0.001	0.0009
				0.001	0.0016	0.0004		0.001	0.0009
				0.001	0.0016	0.0004		0.001	0.0009
				0.001	0.0016	0.0004		0.001	0.0009
				0.001	0.0016	0.0004		0.001	0.0009
				0.001	0.0016	0.0004		0.001	0.0009
				0.0009	0.0016	0.0004		0.001	0.0009
				0.0009	0.0016	0.0003		0.001	0.0009
				0.0009	0.0016	0.0003		0.0009	0.0009
				0.0009	0.0016	0.0003		0.0009	0.0009
				0.0009	0.0016	0.0003		0.0009	0.0008
				0.0009	0.0016	0.0003		0.0009	0.0008
				0.0009	0.0016	0.0003		0.0009	0.0008
				0.0009	0.0015	0.0003		0.0009	0.0008
				0.0009	0.0015	0.0003		0.0009	0.0008
				0.0009	0.0015	0.0002		0.0009	0.0008
				0.0009	0.0015	0.0002		0.0009	0.0008
				0.0009	0.0015	0.0002		0.0009	0.0008
				0.0009	0.0015	0.0002		0.0009	0.0008
				0.0009	0.0015	0.0002		0.0009	0.0008
				0.0008	0.0015	0.0002		0.0009	0.0008
				0.0008	0.0015	0.0002		0.0009	0.0008
				0.0008	0.0015	0.0002		0.0009	0.0008
				0.0008	0.0015	0.0002		0.0009	0.0008
				0.0008	0.0015	0.0002		0.0009	0.0008
				0.0008	0.0015	0.0002		0.0008	0.0008
				0.0008	0.0015			0.0008	0.0008
				0.0008	0.0015			0.0008	0.0008
				0.0008	0.0015			0.0008	0.0008
				0.0008	0.0015			0.0008	0.0008
				0.0008	0.0015			0.0008	0.0008
				0.0008	0.0015			0.0008	0.0008
				0.0008	0.0015			0.0008	0.0007
				0.0008	0.0014			0.0008	0.0007
				0.0008	0.0014			0.0008	0.0007
				0.0008	0.0014			0.0008	0.0007
				0.0008	0.0014			0.0008	0.0007
				0.0008	0.0014			0.0008	0.0007
				0.0008	0.0014			0.0008	0.0007
				0.0008	0.0014			0.0008	0.0007
				0.0007	0.0014			0.0008	0.0007
				0.0007	0.0014			0.0008	0.0007
				0.0007	0.0014			0.0008	0.0007
				0.0007	0.0014			0.0008	0.0006
				0.0007	0.0014			0.0008	0.0006
				0.0007	0.0014			0.0008	0.0006
				0.0007	0.0014			0.0008	0.0006
				0.0007	0.0014			0.0008	0.0006
				0.0007	0.0014			0.0007	0.0006
				0.0007	0.0014			0.0007	0.0006
				0.0007	0.0013			0.0007	0.0006
				0.0007	0.0013			0.0007	0.0006
				0.0007	0.0013			0.0007	0.0006
				0.0007	0.0013			0.0007	0.0006
				0.0007	0.0013			0.0007	0.0006
				0.0006	0.0013			0.0007	0.0006
				0.0006	0.0013			0.0007	0.0006
				0.0006	0.0013			0.0007	0.0006
				0.0006	0.0013			0.0007	0.0006
				0.0006	0.0013			0.0006	0.0006
				0.0006	0.0013			0.0006	0.0005
				0.0006	0.0013			0.0006	0.0005
				0.0006	0.0013			0.0006	0.0005
				0.0006	0.0013			0.0006	0.0005
				0.0006	0.0013			0.0006	0.0005
				0.0006	0.0013			0.0006	0.0005
				0.0006	0.0013			0.0006	0.0005
				0.0006	0.0013			0.0006	0.0005
				0.0006	0.0013			0.0006	0.0005
				0.0006	0.0013			0.0006	0.0005
				0.0006	0.0012			0.0006	0.0005
				0.0006	0.0012			0.0006	0.0005
				0.0006	0.0012			0.0006	0.0005
				0.0005	0.0012			0.0006	0.0004
				0.0005	0.0012			0.0006	0.0004
				0.0005	0.0012			0.0005	0.0004
				0.0005	0.0012			0.0005	0.0004
				0.0005	0.0012			0.0005	0.0004
				0.0005	0.0012			0.0005	0.0004
				0.0005	0.0012			0.0005	0.0004
				0.0005	0.0012			0.0005	0.0004
				0.0005	0.0012			0.0005	0.0004
				0.0005	0.0012			0.0005	0.0004
				0.0005	0.0012			0.0005	0.0004
				0.0005	0.0012			0.0005	0.0004
				0.0005	0.0012			0.0005	0.0004
				0.0005	0.0012			0.0005	0.0003
				0.0005	0.0012			0.0004	0.0003
				0.0005	0.0012			0.0004	0.0003
				0.0004	0.0012			0.0004	0.0003
				0.0004	0.0012			0.0004	0.0003
				0.0004	0.0012			0.0004	0.0003
				0.0004	0.0012			0.0004	0.0003
				0.0004	0.0012			0.0004	0.0003
				0.0004	0.0012			0.0004	0.0003
				0.0004	0.0011			0.0004	0.0003
				0.0004	0.0011			0.0004	0.0002
				0.0004	0.0011			0.0004	0.0002
				0.0004	0.0011			0.0004	0.0002
				0.0004	0.0011			0.0004	0.0002
				0.0004	0.0011			0.0004	0.0002
				0.0004	0.0011			0.0004	0.0002
				0.0004	0.0011			0.0004	0.0002
				0.0004	0.0011			0.0004	0.0002
				0.0004	0.0011			0.0004	0.0002
				0.0003	0.0011			0.0004	0.0002
				0.0003	0.0011			0.0003	0.0002
				0.0003	0.0011			0.0003	0.0002
				0.0003	0.0011			0.0003	0.0002
				0.0003	0.0011			0.0003	0.0002
				0.0003	0.0011			0.0003	0.0002
				0.0003	0.0011			0.0003	0.0002
				0.0002	0.0011			0.0003	0.0002
				0.0002	0.0011			0.0003	0.0002
				0.0002	0.0011			0.0003	0.0002
				0.0002	0.0011			0.0003	0.0002
				0.0002	0.001			0.0003
				0.0002	0.001			0.0002
				0.0002	0.001			0.0002
				0.0002	0.001			0.0002
				0.0002	0.001			0.0002
				0.0002	0.001			0.0002
				0.0002	0.001			0.0002
				0.0002	0.001			0.0002
				0.0002	0.001			0.0002
				0.0002	0.001			0.0002
					0.001			0.0002
					0.001			0.0002
					0.001			0.0002
					0.001			0.0002
					0.001			0.0002
					0.001			0.0002
					0.001			0.0002
					0.001			0.0002
					0.001
					0.001
					0.001
					0.0009
					0.0009
					0.0009
					0.0009
					0.0009
					0.0009
					0.0009
					0.0009
					0.0009
					0.0009
					0.0009
					0.0009
					0.0009
					0.0009
					0.0009
					0.0009
					0.0009
					0.0009
					0.0008
					0.0008
					0.0008
					0.0008
					0.0008
					0.0008
					0.0008
					0.0008
					0.0008
					0.0008
					0.0008
					0.0008
					0.0008
					0.0007
					0.0007
					0.0007
					0.0007
					0.0007
					0.0007
					0.0007
					0.0007
					0.0007
					0.0007
					0.0007
					0.0007
					0.0007
					0.0007
					0.0007
					0.0007
					0.0007
					0.0007
					0.0006
					0.0006
					0.0006
					0.0006
					0.0006
					0.0006
					0.0006
					0.0006
					0.0006
					0.0006
					0.0006
					0.0006
					0.0006
					0.0006
					0.0006
					0.0006
					0.0006
					0.0006
					0.0006
					0.0006
					0.0005
					0.0005
					0.0005
					0.0005
					0.0005
					0.0005
					0.0005
					0.0005
					0.0005
					0.0005
					0.0005
					0.0005
					0.0005
					0.0005
					0.0004
					0.0004
					0.0004
					0.0004
					0.0004
					0.0004
					0.0004
					0.0004
					0.0004
					0.0004
					0.0003
					0.0003
					0.0003
					0.0003
					0.0003
					0.0003
					0.0003
					0.0003
					0.0003
					0.0003
					0.0003
					0.0003
					0.0003
					0.0003
					0.0002
					0.0002
					0.0002
					0.0002
					0.0002
					0.0002
					0.0002
					0.0002
					0.0002
					0.0002
					0.0002
					0.0002
					0.0002

## Sheet: PI(4,5)P2_before
	cell#1	cell#2	cell#3	cell#4	cell#5	cell#6	cell#7	cell#8
cell area	449.617	766.507	872.475	623.073	552.862	785.381	794.258	899.573
cluster areas	0.2435	0.2165	0.2327	0.1949	0.2423	0.2438	0.2416	0.2189
	0.2196	0.2073	0.2144	0.187	0.2423	0.2426	0.2371	0.2104
	0.2072	0.1808	0.2108	0.1858	0.2369	0.2377	0.2333	0.1956
	0.2	0.1683	0.2094	0.1825	0.2061	0.2205	0.2058	0.1864
	0.1918	0.1651	0.1742	0.1799	0.1855	0.2178	0.2036	0.1851
	0.1751	0.164	0.1728	0.16	0.1795	0.2092	0.1725	0.1776
	0.1721	0.1596	0.1727	0.152	0.16	0.2074	0.1638	0.1763
	0.1404	0.1375	0.1706	0.1481	0.1592	0.1936	0.1561	0.1685
	0.1391	0.135	0.1661	0.1417	0.1424	0.1864	0.1536	0.1599
	0.1307	0.1345	0.1656	0.1376	0.1414	0.1796	0.1432	0.1535
	0.1224	0.1341	0.1628	0.1273	0.1403	0.1742	0.1423	0.1453
	0.1104	0.1304	0.16	0.1264	0.1369	0.1718	0.1393	0.1437
	0.0955	0.1279	0.1505	0.1211	0.1114	0.1651	0.1284	0.1414
	0.0951	0.1265	0.1503	0.1199	0.1057	0.1627	0.1263	0.1392
	0.093	0.1244	0.1474	0.1121	0.1052	0.1542	0.1205	0.1364
	0.0887	0.1233	0.1468	0.1048	0.1046	0.1501	0.1176	0.1345
	0.088	0.1219	0.1411	0.1042	0.0932	0.1402	0.1033	0.1287
	0.0871	0.1155	0.1385	0.082	0.0928	0.1382	0.1011	0.1274
	0.0842	0.1151	0.1318	0.0733	0.0927	0.1291	0.0985	0.1205
	0.0765	0.1082	0.1249	0.0679	0.0925	0.1142	0.0976	0.1198
	0.0751	0.1079	0.1207	0.0663	0.0915	0.1114	0.0965	0.1192
	0.0744	0.0987	0.1202	0.0659	0.0871	0.1008	0.0959	0.1168
	0.0702	0.0973	0.1182	0.0613	0.0856	0.1002	0.0954	0.1164
	0.06	0.0943	0.1138	0.0598	0.0853	0.099	0.0948	0.1137
	0.0571	0.093	0.1115	0.0576	0.0786	0.0935	0.0946	0.1137
	0.0571	0.0928	0.111	0.0551	0.0743	0.0911	0.0914	0.113
	0.0562	0.0887	0.1077	0.0551	0.0737	0.0829	0.0907	0.1126
	0.0533	0.0859	0.0973	0.0533	0.0713	0.0813	0.0902	0.1119
	0.053	0.0823	0.0966	0.0529	0.0604	0.0795	0.0859	0.1115
	0.0525	0.0793	0.0823	0.0522	0.06	0.0769	0.0791	0.1109
	0.0503	0.0761	0.0776	0.0519	0.06	0.0767	0.0743	0.1087
	0.0497	0.073	0.0776	0.051	0.0587	0.0743	0.0719	0.1081
	0.0494	0.0727	0.0732	0.0497	0.0567	0.0736	0.0712	0.1043
	0.0487	0.072	0.0732	0.0491	0.0502	0.0691	0.0704	0.1035
	0.0469	0.0698	0.0731	0.0471	0.05	0.0673	0.07	0.1032
	0.0465	0.0687	0.0727	0.0453	0.0493	0.0667	0.0688	0.1014
	0.0441	0.0679	0.0712	0.045	0.0469	0.0651	0.0665	0.1007
	0.044	0.0679	0.07	0.0408	0.0458	0.0633	0.0663	0.0998
	0.0439	0.0659	0.0679	0.0403	0.0437	0.0604	0.0663	0.0996
	0.0423	0.0623	0.0675	0.0395	0.0422	0.0601	0.0581	0.0979
	0.0416	0.0596	0.0622	0.0389	0.042	0.0598	0.0561	0.0975
	0.0407	0.0575	0.0618	0.0381	0.0395	0.0579	0.0553	0.0927
	0.0405	0.0572	0.0601	0.0376	0.0383	0.0575	0.0538	0.085
	0.0404	0.0559	0.0599	0.0376	0.0375	0.057	0.0507	0.082
	0.0399	0.0558	0.0592	0.0375	0.0366	0.0568	0.0496	0.0801
	0.0378	0.0547	0.0588	0.0372	0.0366	0.0565	0.0487	0.0798
	0.037	0.0533	0.0572	0.0371	0.036	0.0541	0.0485	0.0798
	0.036	0.0521	0.0566	0.0371	0.0359	0.0538	0.0484	0.0775
	0.0347	0.0516	0.0548	0.0369	0.0357	0.0534	0.0481	0.0753
	0.0343	0.0505	0.0543	0.0362	0.0356	0.0501	0.0448	0.0747
	0.0342	0.0472	0.0535	0.0357	0.0356	0.0491	0.0444	0.0738
	0.0342	0.0468	0.0525	0.0354	0.0345	0.0484	0.0443	0.0728
	0.034	0.0467	0.0521	0.0353	0.0336	0.0475	0.0432	0.071
	0.0329	0.0444	0.0518	0.0338	0.0335	0.0469	0.0429	0.0708
	0.0327	0.0438	0.0514	0.0334	0.0316	0.0452	0.0428	0.0696
	0.0324	0.0437	0.0513	0.033	0.0304	0.0444	0.0427	0.0693
	0.0323	0.0424	0.0491	0.031	0.0292	0.0441	0.0414	0.0665
	0.0313	0.0423	0.0472	0.03	0.0291	0.042	0.041	0.0663
	0.0301	0.0423	0.0468	0.0296	0.0291	0.0416	0.041	0.0646
	0.03	0.0421	0.0423	0.0295	0.0288	0.0413	0.0391	0.0632
	0.0294	0.0407	0.0422	0.0294	0.0279	0.0411	0.0374	0.0628
	0.0289	0.0402	0.0421	0.0293	0.0275	0.0396	0.0367	0.0616
	0.0289	0.039	0.0413	0.0292	0.0271	0.0394	0.0356	0.0582
	0.0283	0.0388	0.0413	0.0285	0.027	0.0387	0.0356	0.058
	0.0282	0.0387	0.0405	0.0282	0.0267	0.0385	0.0353	0.0579
	0.0273	0.0383	0.0405	0.028	0.0264	0.0384	0.0352	0.0575
	0.0271	0.0375	0.0403	0.028	0.026	0.0379	0.035	0.0564
	0.0267	0.0368	0.0402	0.0276	0.0256	0.0378	0.0346	0.0549
	0.0263	0.0367	0.0397	0.0275	0.0255	0.0377	0.0346	0.0542
	0.0244	0.0362	0.0396	0.0275	0.0253	0.0372	0.0345	0.0498
	0.0239	0.0356	0.0391	0.0274	0.0251	0.0367	0.0342	0.0496
	0.0237	0.0355	0.0388	0.0272	0.0249	0.0365	0.0339	0.0495
	0.0223	0.0349	0.0384	0.0267	0.0247	0.0361	0.0337	0.0493
	0.021	0.0348	0.0382	0.0265	0.0246	0.036	0.0335	0.0483
	0.0208	0.0347	0.0378	0.026	0.0245	0.0337	0.0331	0.0473
	0.0205	0.0343	0.0378	0.0254	0.0238	0.0333	0.033	0.0468
	0.02	0.0337	0.0377	0.0251	0.0236	0.0326	0.0323	0.0451
	0.0199	0.0333	0.0373	0.0251	0.0235	0.0323	0.0318	0.0435
	0.0195	0.0331	0.0367	0.025	0.0235	0.0314	0.0314	0.0428
	0.0193	0.033	0.0364	0.0248	0.0227	0.0311	0.0313	0.0427
	0.0192	0.0327	0.0364	0.0247	0.0226	0.0309	0.0308	0.0421
	0.0191	0.0326	0.0362	0.0247	0.0223	0.0309	0.0306	0.0419
	0.0191	0.0318	0.035	0.0246	0.022	0.0307	0.0305	0.0398
	0.0191	0.0315	0.0346	0.0243	0.0219	0.0306	0.0305	0.0397
	0.0187	0.0307	0.0345	0.0243	0.0213	0.0304	0.03	0.0395
	0.0185	0.0303	0.0345	0.0238	0.0209	0.0303	0.0297	0.0392
	0.0184	0.0302	0.034	0.0234	0.0208	0.0295	0.0297	0.0387
	0.0181	0.0301	0.0336	0.0229	0.0208	0.0295	0.0293	0.0383
	0.018	0.03	0.0333	0.0229	0.0206	0.0291	0.0292	0.0375
	0.0177	0.0298	0.0326	0.0226	0.0206	0.029	0.029	0.0372
	0.0177	0.0298	0.0326	0.0222	0.0204	0.0289	0.0287	0.0349
	0.0168	0.0296	0.0321	0.0218	0.0204	0.0288	0.028	0.0347
	0.0168	0.0294	0.0317	0.0213	0.0201	0.0281	0.0276	0.0345
	0.0167	0.0293	0.0312	0.021	0.0199	0.0279	0.0267	0.0339
	0.0166	0.0292	0.031	0.0209	0.0193	0.0278	0.0264	0.0337
	0.0165	0.029	0.0306	0.0206	0.0192	0.0276	0.0262	0.0334
	0.0164	0.0287	0.03	0.0206	0.019	0.0266	0.026	0.0331
	0.0163	0.0287	0.0298	0.0204	0.0188	0.0262	0.026	0.0325
	0.0163	0.0286	0.0291	0.0203	0.0182	0.0262	0.0259	0.0323
	0.0157	0.028	0.0288	0.0201	0.0181	0.0255	0.0258	0.0323
	0.0156	0.0279	0.0287	0.0201	0.0178	0.0253	0.0256	0.0312
	0.0155	0.0279	0.0284	0.0198	0.0177	0.0251	0.0248	0.0309
	0.0154	0.0273	0.0282	0.0193	0.0177	0.0247	0.0247	0.0307
	0.0154	0.027	0.0281	0.0188	0.0174	0.0245	0.0246	0.0304
	0.0151	0.0266	0.0273	0.0186	0.0172	0.0243	0.0245	0.0299
	0.015	0.0257	0.0271	0.0178	0.017	0.0242	0.0243	0.0297
	0.0149	0.0257	0.0259	0.0174	0.0167	0.0241	0.0242	0.0296
	0.0143	0.0254	0.0257	0.0174	0.0167	0.0235	0.0241	0.0293
	0.0143	0.0249	0.0255	0.0171	0.0167	0.0232	0.024	0.0293
	0.0142	0.0249	0.0253	0.017	0.0167	0.0231	0.0237	0.0285
	0.0142	0.0248	0.0252	0.0169	0.0166	0.023	0.0236	0.0283
	0.0141	0.0247	0.0251	0.0169	0.0166	0.0227	0.0231	0.028
	0.0141	0.0246	0.0251	0.0168	0.0166	0.0224	0.023	0.0278
	0.0139	0.0246	0.025	0.0167	0.0165	0.022	0.0227	0.0278
	0.0134	0.0245	0.0249	0.0167	0.0165	0.0219	0.0226	0.0277
	0.0134	0.0245	0.0245	0.0162	0.0165	0.0219	0.0223	0.0276
	0.0134	0.0245	0.0242	0.016	0.0163	0.0219	0.0223	0.0276
	0.0133	0.0244	0.0239	0.0158	0.0162	0.0218	0.0222	0.0276
	0.0133	0.0242	0.0237	0.0156	0.0161	0.0218	0.0221	0.0271
	0.0131	0.0241	0.0237	0.0156	0.0161	0.0217	0.022	0.0271
	0.0129	0.0237	0.0237	0.0155	0.0161	0.0216	0.0218	0.027
	0.0128	0.0235	0.0236	0.0152	0.0161	0.0215	0.0217	0.0267
	0.0128	0.0234	0.0232	0.0147	0.0155	0.0214	0.0211	0.0263
	0.0127	0.0233	0.0229	0.0147	0.0152	0.0213	0.0211	0.0262
	0.0126	0.0233	0.0229	0.0146	0.0151	0.0207	0.021	0.026
	0.0126	0.0233	0.0228	0.0146	0.0151	0.0207	0.021	0.0257
	0.0122	0.0232	0.0228	0.0146	0.015	0.0205	0.0206	0.0254
	0.0122	0.0231	0.0222	0.0145	0.015	0.0204	0.0205	0.0252
	0.0121	0.023	0.0218	0.0145	0.0148	0.0203	0.0204	0.0251
	0.0121	0.0229	0.0218	0.0143	0.0145	0.0203	0.0201	0.0251
	0.012	0.0227	0.0218	0.0141	0.0144	0.0202	0.0198	0.0251
	0.0119	0.0227	0.0217	0.014	0.0144	0.02	0.0198	0.025
	0.0118	0.0225	0.0217	0.0139	0.0144	0.0199	0.0194	0.0245
	0.0118	0.0224	0.0215	0.0139	0.0144	0.0199	0.0193	0.0244
	0.0118	0.0221	0.0215	0.0139	0.0144	0.0198	0.0192	0.0243
	0.0117	0.0217	0.0212	0.0139	0.0144	0.0197	0.0191	0.0243
	0.0115	0.0216	0.0208	0.0138	0.0143	0.0196	0.0186	0.0243
	0.0115	0.0215	0.0204	0.0138	0.0143	0.0196	0.018	0.0239
	0.0114	0.0213	0.0202	0.0134	0.0143	0.0195	0.018	0.0238
	0.0114	0.0213	0.02	0.0134	0.0141	0.0193	0.0179	0.0238
	0.0113	0.0212	0.02	0.0133	0.0137	0.0193	0.0178	0.0237
	0.0113	0.0212	0.0199	0.0133	0.0135	0.0193	0.0177	0.0237
	0.0112	0.0211	0.0198	0.0132	0.0135	0.0192	0.0177	0.0231
	0.0111	0.021	0.0197	0.0132	0.0134	0.0191	0.0177	0.0226
	0.011	0.0209	0.0197	0.013	0.0131	0.019	0.0175	0.0225
	0.011	0.0209	0.0196	0.013	0.0131	0.0189	0.0173	0.0224
	0.0109	0.0207	0.0195	0.013	0.0128	0.0186	0.0171	0.0223
	0.0106	0.0207	0.0195	0.0129	0.0128	0.0186	0.0171	0.0221
	0.0106	0.0205	0.0195	0.0129	0.0127	0.0185	0.0171	0.0221
	0.0104	0.0202	0.0195	0.0127	0.0125	0.0182	0.0168	0.022
	0.0103	0.0202	0.0194	0.0127	0.0124	0.0182	0.0168	0.022
	0.0101	0.0197	0.0193	0.0127	0.0123	0.0178	0.0166	0.0217
	0.0101	0.0196	0.0191	0.0126	0.0123	0.0176	0.0166	0.0217
	0.0101	0.0195	0.019	0.0125	0.0122	0.0176	0.0165	0.0216
	0.0099	0.0194	0.0189	0.0125	0.0121	0.0175	0.0164	0.0211
	0.0094	0.0194	0.0188	0.0123	0.0121	0.0173	0.0162	0.0209
	0.0093	0.0194	0.0188	0.0122	0.0119	0.0173	0.0162	0.0205
	0.0092	0.0192	0.0187	0.0121	0.0119	0.0172	0.0161	0.0203
	0.0091	0.0192	0.0186	0.0121	0.0117	0.0171	0.0161	0.0203
	0.0091	0.0192	0.0185	0.012	0.0117	0.0169	0.0161	0.02
	0.009	0.0192	0.0184	0.012	0.0117	0.0168	0.0161	0.02
	0.0089	0.0191	0.0184	0.0119	0.0115	0.0168	0.0158	0.0199
	0.0088	0.019	0.0184	0.0119	0.0115	0.0166	0.0156	0.0198
	0.0087	0.0189	0.0183	0.0119	0.0113	0.0165	0.0156	0.0197
	0.0087	0.0186	0.0182	0.0118	0.0112	0.0162	0.0156	0.0194
	0.0086	0.0181	0.0182	0.0116	0.0111	0.0162	0.0154	0.0194
	0.0086	0.0179	0.0182	0.0116	0.0111	0.0159	0.0153	0.0192
	0.0083	0.0177	0.0181	0.0115	0.0111	0.0159	0.0152	0.0191
	0.0083	0.0176	0.0179	0.0114	0.0109	0.0159	0.0152	0.019
	0.0083	0.0175	0.0179	0.0113	0.0109	0.0158	0.0151	0.0189
	0.0081	0.0174	0.0179	0.0112	0.0109	0.0157	0.015	0.0189
	0.0081	0.0173	0.0178	0.0108	0.0107	0.0157	0.015	0.0187
	0.008	0.0173	0.0175	0.0107	0.0107	0.0153	0.015	0.0187
	0.0078	0.017	0.0174	0.0107	0.0107	0.0152	0.0149	0.0184
	0.0077	0.0169	0.0172	0.0106	0.0106	0.0152	0.0149	0.0182
	0.0076	0.0169	0.017	0.0106	0.0103	0.0152	0.0149	0.0181
	0.0076	0.0168	0.017	0.0105	0.0102	0.0151	0.0147	0.0177
	0.0075	0.0167	0.0169	0.0104	0.0099	0.015	0.0147	0.0177
	0.0075	0.0167	0.0168	0.0104	0.0099	0.015	0.0143	0.0176
	0.0075	0.0166	0.0168	0.0103	0.0099	0.0148	0.0143	0.0174
	0.0075	0.0165	0.0165	0.0102	0.0099	0.0147	0.0142	0.0172
	0.0074	0.0165	0.0165	0.0101	0.0098	0.0147	0.0141	0.0172
	0.0074	0.0165	0.0165	0.0101	0.0097	0.0146	0.0139	0.017
	0.0071	0.0164	0.0165	0.0099	0.0097	0.0146	0.0138	0.0168
	0.0071	0.0163	0.0164	0.0099	0.0095	0.0145	0.0137	0.0168
	0.007	0.0162	0.0163	0.0099	0.0093	0.0145	0.0137	0.0167
	0.007	0.0162	0.0162	0.0099	0.0093	0.0145	0.0134	0.0164
	0.0069	0.0161	0.016	0.0098	0.0093	0.0144	0.0134	0.0163
	0.0069	0.0161	0.016	0.0098	0.0093	0.0143	0.0134	0.0163
	0.0069	0.0161	0.016	0.0098	0.0092	0.0143	0.0133	0.0163
	0.0068	0.0161	0.0159	0.0097	0.0092	0.0143	0.0133	0.0163
	0.0068	0.0161	0.0158	0.0097	0.0091	0.0142	0.0133	0.0162
	0.0067	0.016	0.0158	0.0097	0.0091	0.0141	0.0131	0.0162
	0.0067	0.016	0.0156	0.0096	0.009	0.0139	0.0129	0.0161
	0.0066	0.016	0.0156	0.0095	0.009	0.0139	0.0129	0.0161
	0.0066	0.016	0.0155	0.0094	0.0089	0.0138	0.0128	0.0161
	0.0065	0.016	0.0155	0.0094	0.0089	0.0138	0.0126	0.0159
	0.0065	0.0159	0.0155	0.0094	0.0089	0.0137	0.0126	0.0154
	0.0065	0.0159	0.0154	0.0094	0.0088	0.0137	0.0126	0.015
	0.0064	0.0159	0.0154	0.0093	0.0087	0.0137	0.0124	0.0146
	0.0064	0.0157	0.0153	0.0093	0.0086	0.0137	0.0124	0.0146
	0.0064	0.0157	0.0153	0.0092	0.0086	0.0136	0.0122	0.0145
	0.0063	0.0157	0.0151	0.0091	0.0086	0.0134	0.0121	0.0145
	0.0063	0.0156	0.0151	0.009	0.0086	0.0134	0.0121	0.0145
	0.0063	0.0155	0.015	0.009	0.0085	0.0133	0.0121	0.0143
	0.0063	0.0153	0.015	0.009	0.0084	0.0131	0.0121	0.0142
	0.0062	0.0152	0.0149	0.009	0.0083	0.0131	0.012	0.014
	0.0062	0.0151	0.0148	0.009	0.0082	0.013	0.012	0.0139
	0.0061	0.015	0.0148	0.009	0.008	0.013	0.0119	0.0138
	0.006	0.0149	0.0148	0.0089	0.008	0.0129	0.0119	0.0138
	0.006	0.0148	0.0148	0.0089	0.008	0.0126	0.0118	0.0137
	0.006	0.0148	0.0147	0.0089	0.008	0.0126	0.0117	0.0135
	0.006	0.0147	0.0147	0.0088	0.0079	0.0125	0.0117	0.0134
	0.0059	0.0145	0.0146	0.0088	0.0079	0.0122	0.0117	0.0133
	0.0059	0.0144	0.0146	0.0087	0.0078	0.012	0.0117	0.0132
	0.0059	0.0144	0.0145	0.0086	0.0078	0.012	0.0116	0.0132
	0.0059	0.0144	0.0145	0.0086	0.0077	0.012	0.0116	0.0131
	0.0058	0.0144	0.0145	0.0085	0.0077	0.0119	0.0116	0.0131
	0.0057	0.0141	0.0143	0.0085	0.0076	0.0118	0.0115	0.013
	0.0057	0.0141	0.0143	0.0085	0.0076	0.0118	0.0115	0.013
	0.0055	0.0141	0.0141	0.0084	0.0076	0.0117	0.0114	0.013
	0.0055	0.0141	0.0139	0.0084	0.0075	0.0117	0.0114	0.0129
	0.0055	0.0141	0.0138	0.0083	0.0075	0.0117	0.0113	0.0128
	0.0054	0.014	0.0138	0.0083	0.0075	0.0116	0.0113	0.0127
	0.0054	0.014	0.0137	0.0083	0.0075	0.0116	0.0112	0.0127
	0.0054	0.014	0.0137	0.0083	0.0074	0.0116	0.0112	0.0127
	0.0054	0.014	0.0137	0.0083	0.0074	0.0116	0.0111	0.0125
	0.0053	0.0138	0.0136	0.0082	0.0074	0.0115	0.011	0.0125
	0.0053	0.0138	0.0135	0.0082	0.0074	0.0114	0.011	0.0125
	0.0053	0.0138	0.0135	0.0081	0.0074	0.0114	0.011	0.0124
	0.0052	0.0136	0.0135	0.008	0.0074	0.0114	0.011	0.0123
	0.0052	0.0135	0.0133	0.0079	0.0073	0.011	0.011	0.0123
	0.0052	0.0134	0.0133	0.0079	0.0073	0.011	0.0109	0.0123
	0.0052	0.0134	0.0133	0.0078	0.0073	0.0109	0.0109	0.0122
	0.0051	0.0134	0.0131	0.0078	0.0071	0.0109	0.0108	0.0122
	0.0051	0.0133	0.0131	0.0078	0.0071	0.0108	0.0107	0.0122
	0.005	0.0133	0.0131	0.0076	0.0071	0.0108	0.0107	0.0121
	0.005	0.0132	0.0131	0.0076	0.0071	0.0108	0.0106	0.012
	0.0049	0.0131	0.0131	0.0076	0.007	0.0107	0.0106	0.012
	0.0049	0.0131	0.013	0.0076	0.007	0.0107	0.0106	0.0119
	0.0048	0.0129	0.0129	0.0075	0.0069	0.0107	0.0105	0.0118
	0.0048	0.0129	0.0129	0.0075	0.0069	0.0107	0.0103	0.0117
	0.0048	0.0129	0.0129	0.0075	0.0069	0.0106	0.0103	0.0117
	0.0048	0.0129	0.0128	0.0074	0.0068	0.0105	0.0102	0.0117
	0.0048	0.0129	0.0128	0.0074	0.0068	0.0105	0.01	0.0117
	0.0047	0.0128	0.0126	0.0074	0.0068	0.0104	0.0099	0.0117
	0.0047	0.0128	0.0125	0.0073	0.0068	0.0103	0.0099	0.0115
	0.0047	0.0128	0.0124	0.0073	0.0067	0.0103	0.0098	0.0114
	0.0047	0.0128	0.0123	0.0073	0.0067	0.0101	0.0098	0.0114
	0.0047	0.0128	0.0122	0.0073	0.0066	0.0101	0.0098	0.0113
	0.0046	0.0127	0.0122	0.0073	0.0066	0.0099	0.0098	0.0113
	0.0046	0.0127	0.0121	0.0072	0.0066	0.0099	0.0097	0.0112
	0.0046	0.0127	0.0121	0.0072	0.0065	0.0098	0.0097	0.0112
	0.0045	0.0126	0.012	0.0072	0.0065	0.0097	0.0097	0.0111
	0.0045	0.0126	0.012	0.0072	0.0064	0.0096	0.0097	0.0109
	0.0045	0.0126	0.012	0.0072	0.0064	0.0096	0.0096	0.0109
	0.0045	0.0125	0.0118	0.0071	0.0064	0.0095	0.0095	0.0107
	0.0044	0.0125	0.0117	0.0071	0.0063	0.0095	0.0095	0.0107
	0.0044	0.0125	0.0116	0.0071	0.0063	0.0093	0.0095	0.0105
	0.0044	0.0123	0.0116	0.0071	0.0063	0.0093	0.0093	0.0105
	0.0043	0.0122	0.0116	0.0071	0.0061	0.0093	0.0093	0.0105
	0.0043	0.0122	0.0114	0.007	0.0061	0.0092	0.0093	0.0105
	0.0042	0.0122	0.0113	0.007	0.006	0.0091	0.0093	0.0105
	0.0042	0.0121	0.0113	0.007	0.006	0.009	0.0092	0.0104
	0.0042	0.0121	0.0113	0.007	0.0059	0.009	0.0091	0.0104
	0.0042	0.012	0.0112	0.0069	0.0057	0.009	0.009	0.0103
	0.0042	0.0119	0.0112	0.0069	0.0057	0.009	0.009	0.0102
	0.0041	0.0118	0.0112	0.0069	0.0057	0.0089	0.009	0.0102
	0.0041	0.0118	0.0111	0.0069	0.0056	0.0089	0.009	0.0102
	0.0041	0.0118	0.0111	0.0069	0.0056	0.0089	0.0089	0.0102
	0.0041	0.0117	0.0111	0.0068	0.0056	0.0089	0.0089	0.0101
	0.004	0.0115	0.0111	0.0068	0.0055	0.0088	0.0089	0.0101
	0.004	0.0114	0.0111	0.0068	0.0054	0.0088	0.0088	0.01
	0.004	0.0113	0.011	0.0068	0.0054	0.0088	0.0088	0.0099
	0.0039	0.0113	0.011	0.0068	0.0054	0.0088	0.0088	0.0099
	0.0039	0.0113	0.0109	0.0068	0.0054	0.0087	0.0088	0.0098
	0.0039	0.0113	0.0109	0.0067	0.0054	0.0087	0.0086	0.0098
	0.0038	0.0113	0.0108	0.0067	0.0054	0.0087	0.0085	0.0098
	0.0038	0.0113	0.0108	0.0067	0.0054	0.0087	0.0085	0.0098
	0.0038	0.0113	0.0108	0.0066	0.0054	0.0086	0.0084	0.0097
	0.0038	0.0113	0.0108	0.0066	0.0053	0.0086	0.0083	0.0096
	0.0038	0.0113	0.0107	0.0066	0.0053	0.0086	0.0083	0.0096
	0.0038	0.0112	0.0107	0.0064	0.0052	0.0086	0.0082	0.0095
	0.0037	0.0112	0.0107	0.0064	0.0052	0.0085	0.0082	0.0095
	0.0037	0.0111	0.0106	0.0064	0.0052	0.0085	0.0081	0.0095
	0.0037	0.0111	0.0106	0.0064	0.0052	0.0085	0.008	0.0095
	0.0037	0.011	0.0106	0.0063	0.0052	0.0085	0.008	0.0095
	0.0037	0.011	0.0106	0.0063	0.0052	0.0084	0.008	0.0094
	0.0036	0.0109	0.0105	0.0063	0.0051	0.0084	0.008	0.0094
	0.0036	0.0109	0.0105	0.0063	0.0051	0.0084	0.008	0.0094
	0.0035	0.0108	0.0105	0.0062	0.0051	0.0084	0.008	0.0094
	0.0035	0.0107	0.0105	0.0061	0.0051	0.0083	0.008	0.0093
	0.0035	0.0107	0.0105	0.0061	0.0051	0.0083	0.0079	0.0093
	0.0035	0.0106	0.0104	0.006	0.0051	0.0082	0.0079	0.0093
	0.0035	0.0106	0.0104	0.006	0.0051	0.0082	0.0079	0.0093
	0.0034	0.0105	0.0104	0.006	0.0051	0.0082	0.0078	0.0093
	0.0034	0.0105	0.0103	0.0059	0.0051	0.008	0.0078	0.0092
	0.0034	0.0105	0.0103	0.0059	0.005	0.008	0.0078	0.0092
	0.0034	0.0105	0.0103	0.0059	0.0049	0.0079	0.0077	0.0091
	0.0033	0.0105	0.0103	0.0059	0.0049	0.0078	0.0077	0.0091
	0.0033	0.0104	0.0103	0.0058	0.0049	0.0077	0.0077	0.009
	0.0033	0.0104	0.0101	0.0058	0.0049	0.0076	0.0077	0.009
	0.0033	0.0103	0.0101	0.0058	0.0049	0.0075	0.0077	0.009
	0.0032	0.0102	0.0101	0.0058	0.0049	0.0075	0.0076	0.009
	0.0031	0.0101	0.01	0.0057	0.0048	0.0075	0.0076	0.009
	0.0031	0.0101	0.01	0.0057	0.0048	0.0074	0.0076	0.0089
	0.0031	0.0101	0.0099	0.0056	0.0047	0.0074	0.0075	0.0089
	0.0031	0.01	0.0098	0.0056	0.0047	0.0074	0.0075	0.0089
	0.0031	0.0099	0.0098	0.0056	0.0045	0.0074	0.0075	0.0088
	0.003	0.0097	0.0098	0.0055	0.0045	0.0074	0.0074	0.0088
	0.003	0.0097	0.0098	0.0055	0.0045	0.0074	0.0074	0.0088
	0.003	0.0097	0.0097	0.0055	0.0045	0.0073	0.0074	0.0087
	0.003	0.0096	0.0097	0.0055	0.0045	0.0073	0.0072	0.0087
	0.003	0.0095	0.0097	0.0055	0.0044	0.0072	0.0072	0.0086
	0.003	0.0095	0.0096	0.0055	0.0044	0.0071	0.0072	0.0086
	0.003	0.0095	0.0096	0.0054	0.0044	0.0071	0.0072	0.0085
	0.0029	0.0094	0.0095	0.0054	0.0044	0.0071	0.0072	0.0085
	0.0029	0.0094	0.0095	0.0054	0.0043	0.007	0.0071	0.0085
	0.0029	0.0093	0.0094	0.0054	0.0043	0.007	0.0071	0.0085
	0.0029	0.0093	0.0094	0.0054	0.0043	0.007	0.0071	0.0085
	0.0029	0.0093	0.0094	0.0054	0.0043	0.007	0.0071	0.0084
	0.0029	0.0093	0.0094	0.0053	0.0042	0.007	0.0071	0.0084
	0.0029	0.0093	0.0094	0.0053	0.0042	0.007	0.0071	0.0084
	0.0028	0.0092	0.0093	0.0053	0.0042	0.007	0.0071	0.0084
	0.0028	0.0092	0.0092	0.0053	0.0042	0.007	0.007	0.0084
	0.0028	0.0092	0.0092	0.0053	0.0041	0.0069	0.007	0.0083
	0.0028	0.0091	0.0092	0.0053	0.0041	0.0069	0.007	0.0082
	0.0028	0.0091	0.0092	0.0053	0.0041	0.0069	0.007	0.0082
	0.0028	0.0091	0.0092	0.0053	0.004	0.0069	0.0069	0.0081
	0.0028	0.0091	0.0092	0.0053	0.004	0.0069	0.0069	0.0081
	0.0027	0.0091	0.0092	0.0053	0.0039	0.0069	0.0069	0.0081
	0.0027	0.0091	0.0092	0.0052	0.0039	0.0068	0.0069	0.0081
	0.0026	0.009	0.0091	0.0052	0.0039	0.0068	0.0068	0.0081
	0.0025	0.009	0.0091	0.0052	0.0039	0.0068	0.0068	0.0081
	0.0025	0.009	0.0091	0.0052	0.0039	0.0068	0.0068	0.0081
	0.0025	0.0089	0.0091	0.0052	0.0038	0.0067	0.0068	0.0081
	0.0024	0.0089	0.009	0.0051	0.0038	0.0067	0.0068	0.008
	0.0024	0.0088	0.009	0.0051	0.0038	0.0067	0.0067	0.008
	0.0023	0.0088	0.009	0.0051	0.0038	0.0067	0.0067	0.008
	0.0023	0.0087	0.009	0.0051	0.0038	0.0067	0.0067	0.008
	0.0023	0.0087	0.009	0.005	0.0038	0.0067	0.0066	0.0079
	0.0023	0.0087	0.009	0.005	0.0038	0.0067	0.0066	0.0078
	0.0023	0.0087	0.009	0.005	0.0037	0.0066	0.0065	0.0078
	0.0023	0.0086	0.009	0.0049	0.0037	0.0066	0.0065	0.0078
	0.0022	0.0085	0.0089	0.0049	0.0037	0.0066	0.0064	0.0078
	0.0022	0.0085	0.0089	0.0049	0.0037	0.0066	0.0064	0.0078
	0.0022	0.0085	0.0089	0.0048	0.0037	0.0064	0.0063	0.0077
	0.0022	0.0084	0.0088	0.0048	0.0037	0.0064	0.0063	0.0076
	0.0022	0.0084	0.0088	0.0047	0.0037	0.0063	0.0063	0.0076
	0.0022	0.0084	0.0088	0.0047	0.0037	0.0063	0.0063	0.0075
	0.0022	0.0084	0.0088	0.0047	0.0036	0.0063	0.0062	0.0075
	0.0021	0.0083	0.0088	0.0046	0.0036	0.0063	0.0062	0.0075
	0.0021	0.0083	0.0087	0.0046	0.0036	0.0063	0.0062	0.0075
	0.0021	0.0083	0.0087	0.0046	0.0036	0.0063	0.0061	0.0075
	0.0021	0.0083	0.0087	0.0046	0.0036	0.0062	0.0061	0.0075
	0.0021	0.0083	0.0087	0.0045	0.0036	0.0062	0.0061	0.0075
	0.0021	0.0083	0.0087	0.0045	0.0036	0.0062	0.006	0.0074
	0.002	0.0083	0.0086	0.0045	0.0036	0.006	0.006	0.0074
	0.002	0.0083	0.0086	0.0045	0.0035	0.006	0.006	0.0074
	0.002	0.0082	0.0085	0.0045	0.0035	0.006	0.006	0.0073
	0.002	0.0081	0.0085	0.0045	0.0035	0.0059	0.006	0.0073
	0.002	0.0081	0.0085	0.0044	0.0035	0.0059	0.0059	0.0073
	0.002	0.0081	0.0085	0.0044	0.0035	0.0059	0.0059	0.0072
	0.002	0.0081	0.0085	0.0044	0.0035	0.0059	0.0059	0.0072
	0.0019	0.0081	0.0085	0.0044	0.0035	0.0058	0.0059	0.0072
	0.0019	0.0081	0.0085	0.0044	0.0035	0.0058	0.0059	0.0072
	0.0019	0.008	0.0085	0.0044	0.0035	0.0058	0.0058	0.0071
	0.0019	0.0079	0.0085	0.0044	0.0034	0.0058	0.0058	0.0071
	0.0019	0.0078	0.0084	0.0043	0.0034	0.0057	0.0058	0.0071
	0.0019	0.0078	0.0083	0.0043	0.0034	0.0057	0.0058	0.0071
	0.0019	0.0077	0.0083	0.0043	0.0034	0.0057	0.0057	0.0071
	0.0019	0.0077	0.0083	0.0043	0.0034	0.0057	0.0057	0.007
	0.0018	0.0077	0.0082	0.0043	0.0034	0.0056	0.0057	0.007
	0.0018	0.0077	0.0082	0.0042	0.0034	0.0056	0.0057	0.007
	0.0018	0.0077	0.0082	0.0042	0.0034	0.0056	0.0057	0.007
	0.0018	0.0076	0.0082	0.0042	0.0033	0.0055	0.0057	0.007
	0.0018	0.0076	0.0082	0.0042	0.0033	0.0055	0.0057	0.007
	0.0018	0.0076	0.0081	0.0042	0.0033	0.0055	0.0057	0.0069
	0.0018	0.0076	0.0081	0.0042	0.0033	0.0055	0.0056	0.0069
	0.0018	0.0076	0.0081	0.0042	0.0033	0.0055	0.0056	0.0069
	0.0017	0.0076	0.0081	0.0042	0.0033	0.0055	0.0056	0.0068
	0.0017	0.0075	0.0081	0.0042	0.0033	0.0055	0.0055	0.0068
	0.0017	0.0074	0.0081	0.0042	0.0032	0.0055	0.0055	0.0067
	0.0017	0.0074	0.008	0.0042	0.0032	0.0055	0.0055	0.0067
	0.0017	0.0074	0.008	0.0042	0.0032	0.0055	0.0055	0.0067
	0.0016	0.0074	0.0079	0.0042	0.0032	0.0055	0.0055	0.0066
	0.0016	0.0074	0.0079	0.0041	0.0032	0.0054	0.0055	0.0066
	0.0016	0.0074	0.0079	0.0041	0.0032	0.0054	0.0055	0.0066
	0.0016	0.0074	0.0079	0.0041	0.0032	0.0054	0.0054	0.0066
	0.0016	0.0073	0.0078	0.0041	0.0032	0.0054	0.0054	0.0066
	0.0015	0.0073	0.0078	0.0041	0.0032	0.0053	0.0054	0.0066
	0.0015	0.0073	0.0078	0.0041	0.0031	0.0053	0.0053	0.0066
	0.0015	0.0073	0.0078	0.0041	0.0031	0.0053	0.0053	0.0066
	0.0015	0.0072	0.0078	0.0041	0.0031	0.0052	0.0053	0.0065
	0.0015	0.0071	0.0077	0.0041	0.0031	0.0052	0.0052	0.0065
	0.0014	0.0071	0.0077	0.004	0.003	0.0052	0.0052	0.0065
	0.0014	0.0071	0.0077	0.004	0.003	0.0052	0.0052	0.0065
	0.0014	0.0071	0.0077	0.004	0.003	0.0052	0.0052	0.0065
	0.0014	0.0071	0.0077	0.004	0.0029	0.0052	0.0052	0.0064
	0.0013	0.0071	0.0077	0.0039	0.0029	0.0052	0.0052	0.0064
	0.0013	0.007	0.0077	0.0039	0.0029	0.0052	0.0051	0.0064
	0.0013	0.007	0.0077	0.0039	0.0029	0.0051	0.0051	0.0064
	0.0013	0.007	0.0077	0.0039	0.0029	0.0051	0.0051	0.0063
	0.0013	0.007	0.0076	0.0039	0.0028	0.0051	0.0051	0.0063
	0.0013	0.007	0.0076	0.0038	0.0028	0.0051	0.005	0.0062
	0.0013	0.007	0.0076	0.0038	0.0028	0.0051	0.005	0.0062
	0.0012	0.007	0.0076	0.0038	0.0028	0.005	0.005	0.0062
	0.0012	0.0069	0.0075	0.0038	0.0028	0.005	0.005	0.0062
	0.0012	0.0069	0.0075	0.0038	0.0027	0.005	0.005	0.0062
	0.0012	0.0069	0.0075	0.0038	0.0027	0.0049	0.0049	0.0061
	0.0012	0.0069	0.0075	0.0038	0.0027	0.0049	0.0049	0.0061
	0.0012	0.0069	0.0075	0.0038	0.0026	0.0049	0.0049	0.0061
	0.0012	0.0068	0.0075	0.0038	0.0026	0.0049	0.0049	0.0061
	0.0011	0.0067	0.0075	0.0037	0.0026	0.0049	0.0049	0.0061
	0.0011	0.0067	0.0075	0.0037	0.0026	0.0048	0.0049	0.0061
	0.0011	0.0066	0.0074	0.0037	0.0026	0.0048	0.0049	0.0061
	0.0011	0.0066	0.0074	0.0037	0.0026	0.0048	0.0048	0.006
	0.001	0.0066	0.0074	0.0037	0.0026	0.0048	0.0048	0.006
	0.001	0.0066	0.0074	0.0037	0.0025	0.0047	0.0048	0.006
	0.001	0.0066	0.0074	0.0036	0.0025	0.0047	0.0048	0.006
	0.001	0.0066	0.0074	0.0036	0.0025	0.0047	0.0048	0.006
	0.001	0.0066	0.0073	0.0036	0.0025	0.0047	0.0048	0.006
	0.001	0.0066	0.0073	0.0036	0.0024	0.0047	0.0047	0.006
	0.0009	0.0066	0.0073	0.0036	0.0024	0.0047	0.0047	0.0059
	0.0008	0.0066	0.0073	0.0036	0.0024	0.0046	0.0047	0.0059
	0.0008	0.0066	0.0073	0.0036	0.0024	0.0046	0.0047	0.0059
	0.0008	0.0066	0.0073	0.0035	0.0023	0.0046	0.0047	0.0058
	0.0008	0.0066	0.0072	0.0035	0.0023	0.0046	0.0047	0.0058
	0.0008	0.0066	0.0072	0.0035	0.0023	0.0045	0.0047	0.0058
	0.0007	0.0065	0.0072	0.0035	0.0023	0.0045	0.0047	0.0058
	0.0007	0.0064	0.0072	0.0035	0.0023	0.0045	0.0046	0.0058
	0.0007	0.0064	0.0072	0.0035	0.0022	0.0045	0.0046	0.0057
	0.0007	0.0064	0.0071	0.0035	0.0022	0.0045	0.0046	0.0057
	0.0007	0.0064	0.0071	0.0035	0.0022	0.0045	0.0046	0.0057
	0.0007	0.0063	0.0071	0.0035	0.0022	0.0044	0.0046	0.0057
	0.0006	0.0063	0.0071	0.0035	0.0022	0.0044	0.0045	0.0056
	0.0006	0.0063	0.0071	0.0034	0.0022	0.0044	0.0045	0.0056
	0.0005	0.0063	0.0071	0.0034	0.0021	0.0044	0.0045	0.0056
	0.0005	0.0063	0.007	0.0034	0.0021	0.0044	0.0045	0.0055
	0.0005	0.0063	0.007	0.0034	0.0021	0.0044	0.0044	0.0055
	0.0005	0.0063	0.007	0.0034	0.002	0.0044	0.0044	0.0055
	0.0004	0.0063	0.007	0.0034	0.002	0.0043	0.0044	0.0054
	0.0004	0.0063	0.007	0.0034	0.0019	0.0043	0.0044	0.0054
	0.0003	0.0063	0.007	0.0034	0.0019	0.0043	0.0043	0.0054
	0.0003	0.0062	0.007	0.0034	0.0019	0.0043	0.0043	0.0054
	0.0003	0.0062	0.007	0.0034	0.0019	0.0043	0.0043	0.0054
	0.0003	0.0062	0.0069	0.0033	0.0019	0.0042	0.0042	0.0054
	0.0003	0.0062	0.0069	0.0033	0.0019	0.0042	0.0042	0.0054
	0.0003	0.0061	0.0069	0.0033	0.0019	0.0042	0.0042	0.0053
	0.0003	0.0061	0.0069	0.0033	0.0018	0.0042	0.0042	0.0053
	0.0003	0.006	0.0069	0.0033	0.0018	0.0042	0.0042	0.0053
	0.0002	0.006	0.0068	0.0032	0.0018	0.0042	0.0042	0.0053
	0.0002	0.006	0.0068	0.0032	0.0018	0.0042	0.0041	0.0053
	0.0002	0.006	0.0068	0.0032	0.0018	0.0042	0.0041	0.0053
	0.0002	0.006	0.0067	0.0032	0.0018	0.0042	0.0041	0.0053
		0.0059	0.0067	0.0032	0.0018	0.0042	0.0041	0.0052
		0.0059	0.0067	0.0031	0.0018	0.0041	0.0041	0.0052
		0.0059	0.0067	0.0031	0.0018	0.004	0.0041	0.0052
		0.0059	0.0067	0.0031	0.0017	0.004	0.0041	0.0052
		0.0058	0.0066	0.0031	0.0017	0.004	0.0041	0.0052
		0.0058	0.0066	0.0031	0.0017	0.004	0.004	0.0052
		0.0058	0.0066	0.003	0.0017	0.0039	0.004	0.0052
		0.0058	0.0066	0.003	0.0017	0.0039	0.004	0.0051
		0.0058	0.0066	0.003	0.0017	0.0039	0.004	0.0051
		0.0058	0.0066	0.003	0.0017	0.0039	0.004	0.0051
		0.0058	0.0066	0.003	0.0017	0.0038	0.004	0.0051
		0.0058	0.0066	0.003	0.0017	0.0038	0.0039	0.0051
		0.0057	0.0066	0.003	0.0016	0.0038	0.0039	0.0051
		0.0057	0.0066	0.003	0.0016	0.0038	0.0039	0.0051
		0.0057	0.0066	0.003	0.0016	0.0038	0.0039	0.0051
		0.0057	0.0066	0.003	0.0016	0.0038	0.0039	0.005
		0.0057	0.0066	0.0029	0.0016	0.0038	0.0039	0.005
		0.0057	0.0065	0.0029	0.0016	0.0038	0.0039	0.005
		0.0056	0.0065	0.0029	0.0016	0.0038	0.0038	0.005
		0.0056	0.0065	0.0029	0.0016	0.0038	0.0038	0.005
		0.0056	0.0065	0.0029	0.0016	0.0038	0.0038	0.005
		0.0056	0.0065	0.0029	0.0016	0.0038	0.0038	0.005
		0.0056	0.0064	0.0029	0.0016	0.0038	0.0038	0.005
		0.0056	0.0064	0.0029	0.0016	0.0037	0.0038	0.005
		0.0056	0.0064	0.0029	0.0016	0.0037	0.0038	0.005
		0.0056	0.0064	0.0028	0.0015	0.0037	0.0037	0.005
		0.0056	0.0063	0.0028	0.0015	0.0037	0.0037	0.0049
		0.0056	0.0063	0.0028	0.0015	0.0037	0.0037	0.0049
		0.0055	0.0063	0.0028	0.0015	0.0037	0.0037	0.0049
		0.0055	0.0063	0.0028	0.0015	0.0037	0.0037	0.0049
		0.0055	0.0062	0.0028	0.0015	0.0036	0.0037	0.0049
		0.0055	0.0062	0.0028	0.0015	0.0036	0.0037	0.0049
		0.0055	0.0062	0.0028	0.0015	0.0036	0.0037	0.0048
		0.0055	0.0062	0.0028	0.0015	0.0036	0.0036	0.0048
		0.0055	0.0062	0.0028	0.0015	0.0036	0.0036	0.0048
		0.0054	0.0061	0.0028	0.0015	0.0036	0.0036	0.0048
		0.0054	0.0061	0.0028	0.0014	0.0036	0.0036	0.0048
		0.0054	0.0061	0.0028	0.0014	0.0035	0.0036	0.0048
		0.0054	0.0061	0.0027	0.0014	0.0035	0.0036	0.0048
		0.0054	0.006	0.0027	0.0014	0.0035	0.0036	0.0048
		0.0054	0.006	0.0027	0.0014	0.0035	0.0036	0.0048
		0.0053	0.006	0.0027	0.0013	0.0035	0.0036	0.0047
		0.0053	0.006	0.0027	0.0013	0.0035	0.0036	0.0047
		0.0053	0.0059	0.0027	0.0013	0.0035	0.0036	0.0047
		0.0053	0.0059	0.0027	0.0013	0.0034	0.0036	0.0046
		0.0052	0.0059	0.0027	0.0013	0.0034	0.0036	0.0046
		0.0052	0.0059	0.0027	0.0013	0.0034	0.0035	0.0046
		0.0052	0.0059	0.0027	0.0013	0.0034	0.0035	0.0045
		0.0052	0.0058	0.0027	0.0013	0.0034	0.0035	0.0045
		0.0052	0.0058	0.0027	0.0013	0.0034	0.0035	0.0044
		0.0052	0.0058	0.0027	0.0013	0.0034	0.0035	0.0044
		0.0052	0.0057	0.0027	0.0013	0.0033	0.0035	0.0044
		0.0051	0.0057	0.0026	0.0012	0.0033	0.0035	0.0044
		0.0051	0.0057	0.0026	0.0012	0.0033	0.0035	0.0044
		0.0051	0.0057	0.0026	0.0012	0.0033	0.0035	0.0044
		0.0051	0.0057	0.0026	0.0011	0.0033	0.0034	0.0044
		0.0051	0.0056	0.0026	0.0011	0.0033	0.0034	0.0044
		0.0051	0.0056	0.0026	0.0011	0.0033	0.0034	0.0044
		0.0051	0.0056	0.0026	0.0011	0.0033	0.0034	0.0043
		0.0051	0.0056	0.0025	0.0011	0.0033	0.0034	0.0043
		0.0051	0.0056	0.0025	0.0011	0.0032	0.0034	0.0043
		0.005	0.0056	0.0025	0.0011	0.0032	0.0034	0.0043
		0.005	0.0056	0.0025	0.0011	0.0032	0.0034	0.0043
		0.005	0.0056	0.0025	0.001	0.0032	0.0034	0.0043
		0.005	0.0055	0.0025	0.001	0.0032	0.0034	0.0043
		0.005	0.0055	0.0025	0.001	0.0032	0.0034	0.0043
		0.005	0.0055	0.0025	0.001	0.0032	0.0034	0.0043
		0.005	0.0055	0.0025	0.001	0.0032	0.0034	0.0042
		0.0049	0.0055	0.0024	0.001	0.0031	0.0033	0.0042
		0.0049	0.0055	0.0024	0.001	0.0031	0.0033	0.0042
		0.0049	0.0055	0.0024	0.0009	0.0031	0.0033	0.0042
		0.0049	0.0055	0.0024	0.0009	0.0031	0.0033	0.0042
		0.0049	0.0054	0.0024	0.0009	0.0031	0.0033	0.0042
		0.0049	0.0054	0.0024	0.0009	0.0031	0.0033	0.0041
		0.0049	0.0054	0.0024	0.0009	0.003	0.0033	0.0041
		0.0049	0.0054	0.0024	0.0009	0.003	0.0033	0.0041
		0.0049	0.0054	0.0023	0.0008	0.003	0.0033	0.0041
		0.0049	0.0054	0.0023	0.0008	0.003	0.0033	0.0041
		0.0048	0.0054	0.0023	0.0008	0.003	0.0032	0.0041
		0.0048	0.0053	0.0023	0.0008	0.003	0.0032	0.0041
		0.0048	0.0053	0.0023	0.0008	0.003	0.0032	0.0041
		0.0048	0.0053	0.0023	0.0008	0.003	0.0032	0.004
		0.0048	0.0053	0.0023	0.0008	0.003	0.0032	0.004
		0.0048	0.0053	0.0023	0.0008	0.0029	0.0032	0.004
		0.0048	0.0053	0.0023	0.0008	0.0029	0.0032	0.004
		0.0048	0.0053	0.0023	0.0007	0.0029	0.0032	0.004
		0.0047	0.0053	0.0022	0.0007	0.0029	0.0031	0.004
		0.0047	0.0053	0.0022	0.0007	0.0029	0.0031	0.004
		0.0047	0.0053	0.0022	0.0007	0.0029	0.0031	0.0039
		0.0047	0.0052	0.0022	0.0007	0.0029	0.0031	0.0039
		0.0047	0.0052	0.0022	0.0006	0.0029	0.0031	0.0039
		0.0047	0.0052	0.0021	0.0006	0.0029	0.0031	0.0039
		0.0046	0.0052	0.0021	0.0006	0.0029	0.003	0.0039
		0.0046	0.0052	0.0021	0.0006	0.0028	0.003	0.0039
		0.0046	0.0052	0.0021	0.0006	0.0028	0.003	0.0039
		0.0046	0.0052	0.0021	0.0005	0.0028	0.003	0.0038
		0.0046	0.0052	0.0021	0.0005	0.0028	0.003	0.0038
		0.0046	0.0052	0.0021	0.0005	0.0028	0.003	0.0038
		0.0046	0.0052	0.0021	0.0004	0.0028	0.003	0.0038
		0.0046	0.0052	0.0021	0.0004	0.0028	0.003	0.0038
		0.0046	0.0051	0.002	0.0004	0.0028	0.003	0.0038
		0.0045	0.0051	0.002	0.0004	0.0028	0.003	0.0038
		0.0045	0.0051	0.002	0.0003	0.0028	0.0029	0.0038
		0.0045	0.0051	0.002	0.0003	0.0028	0.0029	0.0038
		0.0045	0.0051	0.002	0.0003	0.0028	0.0029	0.0038
		0.0045	0.0051	0.002	0.0003	0.0027	0.0029	0.0037
		0.0045	0.0051	0.002	0.0003	0.0027	0.0029	0.0037
		0.0044	0.0051	0.0019	0.0002	0.0027	0.0029	0.0037
		0.0044	0.005	0.0019	0.0002	0.0027	0.0029	0.0037
		0.0044	0.005	0.0019	0.0002	0.0027	0.0029	0.0037
		0.0044	0.005	0.0019	0.0002	0.0027	0.0029	0.0037
		0.0044	0.005	0.0019	0.0002	0.0027	0.0029	0.0037
		0.0044	0.005	0.0019		0.0026	0.0029	0.0036
		0.0043	0.005	0.0019		0.0026	0.0029	0.0036
		0.0043	0.0049	0.0019		0.0026	0.0029	0.0036
		0.0043	0.0049	0.0019		0.0026	0.0029	0.0036
		0.0043	0.0049	0.0019		0.0026	0.0029	0.0036
		0.0043	0.0049	0.0018		0.0026	0.0029	0.0036
		0.0043	0.0049	0.0018		0.0026	0.0028	0.0036
		0.0043	0.0049	0.0018		0.0025	0.0028	0.0036
		0.0043	0.0049	0.0018		0.0025	0.0028	0.0036
		0.0043	0.0049	0.0018		0.0025	0.0028	0.0036
		0.0043	0.0049	0.0018		0.0025	0.0027	0.0036
		0.0042	0.0049	0.0018		0.0025	0.0027	0.0036
		0.0042	0.0049	0.0018		0.0025	0.0027	0.0035
		0.0042	0.0048	0.0018		0.0024	0.0027	0.0035
		0.0042	0.0048	0.0018		0.0024	0.0027	0.0035
		0.0042	0.0048	0.0017		0.0024	0.0027	0.0035
		0.0042	0.0048	0.0017		0.0024	0.0027	0.0035
		0.0042	0.0048	0.0017		0.0024	0.0027	0.0035
		0.0042	0.0048	0.0017		0.0024	0.0027	0.0034
		0.0041	0.0048	0.0017		0.0024	0.0027	0.0034
		0.0041	0.0048	0.0017		0.0024	0.0027	0.0034
		0.0041	0.0047	0.0017		0.0024	0.0026	0.0034
		0.0041	0.0047	0.0017		0.0024	0.0026	0.0034
		0.0041	0.0047	0.0017		0.0023	0.0026	0.0033
		0.0041	0.0047	0.0016		0.0023	0.0026	0.0033
		0.0041	0.0046	0.0016		0.0023	0.0026	0.0033
		0.0041	0.0046	0.0016		0.0023	0.0026	0.0033
		0.0041	0.0046	0.0016		0.0023	0.0026	0.0033
		0.0041	0.0046	0.0016		0.0023	0.0026	0.0033
		0.0041	0.0046	0.0016		0.0023	0.0026	0.0032
		0.004	0.0046	0.0016		0.0022	0.0026	0.0032
		0.004	0.0046	0.0016		0.0022	0.0025	0.0032
		0.004	0.0046	0.0016		0.0022	0.0025	0.0032
		0.004	0.0045	0.0016		0.0022	0.0025	0.0032
		0.004	0.0045	0.0015		0.0022	0.0025	0.0032
		0.004	0.0045	0.0015		0.0022	0.0025	0.0031
		0.004	0.0045	0.0015		0.0022	0.0025	0.0031
		0.004	0.0045	0.0015		0.0022	0.0025	0.0031
		0.004	0.0045	0.0015		0.0021	0.0025	0.0031
		0.004	0.0045	0.0015		0.0021	0.0024	0.0031
		0.004	0.0045	0.0015		0.0021	0.0024	0.0031
		0.0039	0.0045	0.0015		0.0021	0.0024	0.0031
		0.0039	0.0045	0.0015		0.0021	0.0024	0.0031
		0.0039	0.0045	0.0015		0.0021	0.0024	0.0031
		0.0039	0.0045	0.0015		0.0021	0.0024	0.003
		0.0039	0.0044	0.0015		0.0021	0.0024	0.003
		0.0039	0.0044	0.0014		0.002	0.0023	0.003
		0.0039	0.0044	0.0014		0.002	0.0023	0.003
		0.0039	0.0044	0.0014		0.002	0.0023	0.003
		0.0039	0.0044	0.0014		0.002	0.0023	0.0029
		0.0039	0.0044	0.0014		0.002	0.0023	0.0028
		0.0038	0.0044	0.0014		0.002	0.0023	0.0028
		0.0038	0.0044	0.0014		0.002	0.0023	0.0028
		0.0038	0.0044	0.0014		0.002	0.0023	0.0028
		0.0038	0.0044	0.0014		0.002	0.0022	0.0028
		0.0038	0.0044	0.0014		0.002	0.0022	0.0028
		0.0038	0.0044	0.0014		0.0019	0.0022	0.0028
		0.0038	0.0043	0.0014		0.0019	0.0022	0.0028
		0.0038	0.0043	0.0013		0.0019	0.0022	0.0028
		0.0038	0.0043	0.0013		0.0019	0.0022	0.0028
		0.0038	0.0043	0.0013		0.0019	0.0022	0.0027
		0.0038	0.0043	0.0013		0.0019	0.0022	0.0027
		0.0038	0.0043	0.0013		0.0019	0.0022	0.0027
		0.0038	0.0042	0.0013		0.0019	0.0022	0.0027
		0.0038	0.0042	0.0013		0.0019	0.0022	0.0027
		0.0038	0.0042	0.0013		0.0019	0.0022	0.0027
		0.0037	0.0042	0.0013		0.0019	0.0022	0.0027
		0.0037	0.0042	0.0012		0.0019	0.0022	0.0027
		0.0037	0.0042	0.0012		0.0019	0.0021	0.0027
		0.0037	0.0041	0.0012		0.0018	0.0021	0.0026
		0.0037	0.0041	0.0012		0.0018	0.0021	0.0026
		0.0037	0.0041	0.0012		0.0018	0.0021	0.0026
		0.0037	0.0041	0.0012		0.0018	0.0021	0.0026
		0.0037	0.0041	0.0012		0.0018	0.0021	0.0026
		0.0037	0.0041	0.0012		0.0018	0.0021	0.0026
		0.0037	0.0041	0.0012		0.0018	0.0021	0.0026
		0.0037	0.0041	0.0012		0.0018	0.002	0.0026
		0.0037	0.004	0.0012		0.0017	0.002	0.0026
		0.0036	0.004	0.0012		0.0017	0.002	0.0026
		0.0036	0.004	0.0012		0.0017	0.002	0.0026
		0.0036	0.004	0.0012		0.0017	0.002	0.0026
		0.0036	0.004	0.0011		0.0017	0.002	0.0026
		0.0036	0.0039	0.0011		0.0017	0.002	0.0026
		0.0036	0.0039	0.0011		0.0017	0.002	0.0025
		0.0036	0.0039	0.0011		0.0017	0.002	0.0025
		0.0036	0.0039	0.0011		0.0016	0.002	0.0025
		0.0036	0.0039	0.0011		0.0016	0.002	0.0025
		0.0036	0.0039	0.0011		0.0016	0.0019	0.0025
		0.0036	0.0038	0.0011		0.0016	0.0019	0.0025
		0.0036	0.0038	0.0011		0.0016	0.0019	0.0025
		0.0036	0.0038	0.0011		0.0016	0.0019	0.0025
		0.0035	0.0038	0.0011		0.0016	0.0019	0.0025
		0.0035	0.0038	0.0011		0.0016	0.0019	0.0025
		0.0035	0.0038	0.0011		0.0016	0.0019	0.0025
		0.0035	0.0038	0.0011		0.0016	0.0019	0.0024
		0.0035	0.0038	0.0011		0.0016	0.0018	0.0024
		0.0035	0.0038	0.0011		0.0015	0.0018	0.0024
		0.0035	0.0038	0.0011		0.0015	0.0018	0.0024
		0.0035	0.0037	0.001		0.0015	0.0018	0.0024
		0.0034	0.0037	0.001		0.0015	0.0018	0.0024
		0.0034	0.0037	0.001		0.0015	0.0018	0.0024
		0.0034	0.0037	0.001		0.0015	0.0018	0.0024
		0.0034	0.0037	0.001		0.0015	0.0018	0.0024
		0.0034	0.0037	0.001		0.0015	0.0018	0.0024
		0.0034	0.0037	0.001		0.0015	0.0018	0.0024
		0.0034	0.0037	0.0009		0.0014	0.0018	0.0023
		0.0034	0.0037	0.0009		0.0014	0.0018	0.0023
		0.0034	0.0037	0.0009		0.0014	0.0018	0.0023
		0.0033	0.0037	0.0009		0.0014	0.0017	0.0023
		0.0033	0.0037	0.0009		0.0014	0.0017	0.0022
		0.0033	0.0037	0.0009		0.0014	0.0017	0.0022
		0.0033	0.0037	0.0009		0.0014	0.0017	0.0022
		0.0033	0.0037	0.0009		0.0014	0.0017	0.0022
		0.0033	0.0036	0.0009		0.0014	0.0017	0.0022
		0.0033	0.0036	0.0009		0.0014	0.0017	0.0022
		0.0033	0.0036	0.0008		0.0014	0.0017	0.0022
		0.0032	0.0036	0.0008		0.0014	0.0017	0.0022
		0.0032	0.0036	0.0008		0.0014	0.0017	0.0022
		0.0032	0.0036	0.0008		0.0014	0.0017	0.0022
		0.0032	0.0036	0.0008		0.0014	0.0017	0.0022
		0.0032	0.0036	0.0008		0.0014	0.0016	0.0022
		0.0032	0.0036	0.0008		0.0013	0.0016	0.0022
		0.0032	0.0036	0.0008		0.0013	0.0016	0.0022
		0.0032	0.0036	0.0008		0.0013	0.0016	0.0022
		0.0032	0.0036	0.0008		0.0013	0.0016	0.0022
		0.0032	0.0036	0.0008		0.0013	0.0016	0.0022
		0.0031	0.0035	0.0008		0.0013	0.0016	0.0022
		0.0031	0.0035	0.0008		0.0013	0.0016	0.0022
		0.0031	0.0035	0.0008		0.0013	0.0016	0.0022
		0.0031	0.0035	0.0007		0.0013	0.0016	0.0021
		0.0031	0.0035	0.0007		0.0013	0.0016	0.0021
		0.0031	0.0035	0.0007		0.0013	0.0016	0.0021
		0.003	0.0035	0.0007		0.0013	0.0016	0.0021
		0.003	0.0035	0.0007		0.0013	0.0016	0.0021
		0.003	0.0035	0.0007		0.0013	0.0015	0.0021
		0.003	0.0035	0.0007		0.0013	0.0015	0.0021
		0.003	0.0035	0.0007		0.0012	0.0015	0.0021
		0.003	0.0035	0.0007		0.0012	0.0015	0.0021
		0.003	0.0035	0.0007		0.0012	0.0015	0.0021
		0.003	0.0035	0.0006		0.0012	0.0015	0.0021
		0.003	0.0034	0.0006		0.0012	0.0015	0.0021
		0.003	0.0034	0.0006		0.0012	0.0015	0.0021
		0.003	0.0034	0.0006		0.0012	0.0015	0.0021
		0.003	0.0034	0.0006		0.0012	0.0015	0.0021
		0.003	0.0034	0.0006		0.0012	0.0015	0.002
		0.003	0.0034	0.0006		0.0012	0.0015	0.002
		0.003	0.0034	0.0006		0.0012	0.0014	0.002
		0.0029	0.0034	0.0006		0.0012	0.0014	0.002
		0.0029	0.0034	0.0006		0.0012	0.0014	0.002
		0.0029	0.0034	0.0006		0.0012	0.0014	0.002
		0.0029	0.0034	0.0005		0.0012	0.0014	0.002
		0.0029	0.0034	0.0005		0.0011	0.0014	0.002
		0.0029	0.0033	0.0005		0.0011	0.0014	0.0019
		0.0029	0.0033	0.0005		0.0011	0.0014	0.0019
		0.0029	0.0033	0.0005		0.0011	0.0014	0.0019
		0.0029	0.0033	0.0005		0.0011	0.0014	0.0019
		0.0029	0.0033	0.0005		0.0011	0.0013	0.0019
		0.0028	0.0033	0.0005		0.0011	0.0013	0.0019
		0.0028	0.0033	0.0005		0.0011	0.0013	0.0019
		0.0028	0.0033	0.0005		0.0011	0.0013	0.0019
		0.0028	0.0033	0.0005		0.0011	0.0013	0.0019
		0.0028	0.0033	0.0005		0.0011	0.0013	0.0019
		0.0028	0.0033	0.0005		0.0011	0.0013	0.0019
		0.0028	0.0033	0.0004		0.0011	0.0013	0.0018
		0.0028	0.0033	0.0004		0.0011	0.0013	0.0018
		0.0028	0.0033	0.0004		0.001	0.0012	0.0018
		0.0028	0.0033	0.0004		0.001	0.0012	0.0018
		0.0028	0.0032	0.0004		0.001	0.0012	0.0018
		0.0028	0.0032	0.0004		0.001	0.0012	0.0018
		0.0028	0.0032	0.0003		0.001	0.0012	0.0018
		0.0028	0.0032	0.0003		0.001	0.0012	0.0018
		0.0028	0.0032	0.0003		0.001	0.0012	0.0018
		0.0027	0.0032	0.0003		0.001	0.0012	0.0018
		0.0027	0.0032	0.0003		0.0009	0.0012	0.0018
		0.0027	0.0031	0.0003		0.0009	0.0012	0.0018
		0.0027	0.0031	0.0003		0.0009	0.0012	0.0018
		0.0027	0.0031	0.0002		0.0009	0.0012	0.0018
		0.0027	0.0031	0.0002		0.0009	0.0012	0.0018
		0.0027	0.003	0.0002		0.0009	0.0012	0.0018
		0.0027	0.003	0.0002		0.0009	0.0012	0.0018
		0.0027	0.003	0.0002		0.0009	0.0012	0.0018
		0.0026	0.003	0.0002		0.0008	0.0012	0.0017
		0.0026	0.003			0.0008	0.0012	0.0017
		0.0026	0.003			0.0008	0.0012	0.0017
		0.0026	0.003			0.0008	0.0011	0.0017
		0.0026	0.003			0.0008	0.0011	0.0017
		0.0026	0.003			0.0008	0.0011	0.0017
		0.0026	0.003			0.0008	0.0011	0.0017
		0.0026	0.003			0.0007	0.0011	0.0017
		0.0026	0.003			0.0007	0.0011	0.0017
		0.0026	0.003			0.0007	0.0011	0.0017
		0.0026	0.0029			0.0007	0.0011	0.0017
		0.0026	0.0029			0.0007	0.0011	0.0017
		0.0026	0.0029			0.0007	0.0011	0.0017
		0.0026	0.0029			0.0006	0.0011	0.0017
		0.0025	0.0029			0.0006	0.001	0.0016
		0.0025	0.0029			0.0006	0.001	0.0016
		0.0025	0.0029			0.0006	0.001	0.0016
		0.0025	0.0029			0.0006	0.001	0.0016
		0.0025	0.0029			0.0006	0.001	0.0016
		0.0025	0.0029			0.0006	0.001	0.0016
		0.0025	0.0029			0.0006	0.001	0.0016
		0.0025	0.0029			0.0006	0.001	0.0016
		0.0025	0.0029			0.0005	0.001	0.0016
		0.0025	0.0029			0.0005	0.001	0.0016
		0.0025	0.0029			0.0005	0.001	0.0015
		0.0024	0.0028			0.0005	0.001	0.0015
		0.0024	0.0028			0.0005	0.001	0.0015
		0.0024	0.0028			0.0005	0.001	0.0015
		0.0024	0.0028			0.0005	0.001	0.0015
		0.0024	0.0028			0.0004	0.0009	0.0015
		0.0024	0.0028			0.0004	0.0009	0.0015
		0.0024	0.0028			0.0004	0.0009	0.0015
		0.0024	0.0028			0.0004	0.0009	0.0015
		0.0024	0.0028			0.0004	0.0009	0.0015
		0.0024	0.0028			0.0004	0.0009	0.0015
		0.0024	0.0028			0.0004	0.0009	0.0014
		0.0024	0.0027			0.0004	0.0009	0.0014
		0.0024	0.0027			0.0003	0.0009	0.0014
		0.0024	0.0027			0.0003	0.0009	0.0014
		0.0024	0.0027			0.0003	0.0009	0.0014
		0.0024	0.0027			0.0003	0.0009	0.0014
		0.0024	0.0027			0.0003	0.0009	0.0014
		0.0024	0.0027			0.0003	0.0009	0.0014
		0.0024	0.0027				0.0009	0.0014
		0.0024	0.0027				0.0009	0.0014
		0.0024	0.0027				0.0009	0.0013
		0.0023	0.0027				0.0009	0.0013
		0.0023	0.0027				0.0008	0.0013
		0.0023	0.0027				0.0008	0.0013
		0.0023	0.0027				0.0008	0.0013
		0.0023	0.0026				0.0008	0.0013
		0.0023	0.0026				0.0008	0.0013
		0.0023	0.0026				0.0008	0.0013
		0.0023	0.0026				0.0008	0.0013
		0.0023	0.0026				0.0008	0.0013
		0.0023	0.0026				0.0008	0.0013
		0.0023	0.0026				0.0008	0.0012
		0.0023	0.0026				0.0008	0.0012
		0.0023	0.0026				0.0008	0.0012
		0.0023	0.0026				0.0008	0.0012
		0.0022	0.0026				0.0008	0.0012
		0.0022	0.0026				0.0007	0.0012
		0.0022	0.0026				0.0007	0.0012
		0.0022	0.0026				0.0007	0.0012
		0.0022	0.0025				0.0007	0.0012
		0.0022	0.0025				0.0007	0.0012
		0.0022	0.0025				0.0007	0.0012
		0.0022	0.0025				0.0006	0.0012
		0.0022	0.0025				0.0006	0.0012
		0.0022	0.0025				0.0006	0.0012
		0.0022	0.0025				0.0006	0.0012
		0.0022	0.0025				0.0006	0.0011
		0.0022	0.0025				0.0006	0.0011
		0.0022	0.0025				0.0006	0.0011
		0.0022	0.0025				0.0005	0.0011
		0.0021	0.0025				0.0005	0.0011
		0.0021	0.0025				0.0005	0.0011
		0.0021	0.0025				0.0005	0.0011
		0.0021	0.0024				0.0005	0.0011
		0.002	0.0024				0.0004	0.0011
		0.002	0.0024				0.0004	0.0011
		0.002	0.0024				0.0004	0.0011
		0.002	0.0024				0.0004	0.0011
		0.002	0.0024				0.0004	0.0011
		0.002	0.0024				0.0004	0.0011
		0.002	0.0023				0.0004	0.0011
		0.002	0.0023				0.0004	0.0011
		0.002	0.0023				0.0003	0.0011
		0.002	0.0023				0.0003	0.0011
		0.002	0.0023				0.0003	0.0011
		0.002	0.0023				0.0003	0.0011
		0.002	0.0023				0.0003	0.0011
		0.002	0.0023				0.0003	0.0011
		0.002	0.0023				0.0002	0.0011
		0.0019	0.0023				0.0002	0.0011
		0.0019	0.0023				0.0002	0.001
		0.0019	0.0022				0.0002	0.001
		0.0019	0.0022				0.0002	0.001
		0.0019	0.0022				0.0002	0.001
		0.0019	0.0022					0.001
		0.0019	0.0022					0.0009
		0.0019	0.0022					0.0009
		0.0019	0.0022					0.0009
		0.0019	0.0022					0.0009
		0.0019	0.0022					0.0009
		0.0019	0.0022					0.0009
		0.0019	0.0022					0.0008
		0.0019	0.0022					0.0008
		0.0019	0.0022					0.0008
		0.0019	0.0022					0.0008
		0.0019	0.0022					0.0008
		0.0019	0.0022					0.0008
		0.0018	0.0022					0.0008
		0.0018	0.0022					0.0008
		0.0018	0.0022					0.0008
		0.0018	0.0022					0.0008
		0.0018	0.0022					0.0008
		0.0018	0.0021					0.0007
		0.0018	0.0021					0.0007
		0.0018	0.0021					0.0007
		0.0018	0.0021					0.0007
		0.0018	0.0021					0.0007
		0.0018	0.0021					0.0007
		0.0018	0.0021					0.0006
		0.0018	0.0021					0.0006
		0.0018	0.0021					0.0006
		0.0018	0.0021					0.0006
		0.0018	0.0021					0.0006
		0.0018	0.0021					0.0006
		0.0018	0.0021					0.0006
		0.0017	0.0021					0.0006
		0.0017	0.002					0.0005
		0.0017	0.002					0.0005
		0.0017	0.002					0.0005
		0.0017	0.002					0.0005
		0.0017	0.002					0.0005
		0.0017	0.002					0.0005
		0.0017	0.002					0.0005
		0.0017	0.002					0.0005
		0.0017	0.002					0.0004
		0.0017	0.002					0.0004
		0.0017	0.002					0.0004
		0.0017	0.002					0.0004
		0.0017	0.002					0.0004
		0.0016	0.002					0.0003
		0.0016	0.002					0.0003
		0.0016	0.002					0.0003
		0.0016	0.002					0.0003
		0.0016	0.0019					0.0003
		0.0016	0.0019					0.0003
		0.0016	0.0019					0.0002
		0.0016	0.0019					0.0002
		0.0016	0.0019					0.0002
		0.0016	0.0019					0.0002
		0.0016	0.0019					0.0002
		0.0016	0.0019					0.0002
		0.0016	0.0019
		0.0016	0.0019
		0.0016	0.0019
		0.0016	0.0019
		0.0016	0.0019
		0.0016	0.0019
		0.0015	0.0019
		0.0015	0.0019
		0.0015	0.0019
		0.0015	0.0019
		0.0015	0.0018
		0.0015	0.0018
		0.0015	0.0018
		0.0015	0.0018
		0.0015	0.0018
		0.0015	0.0018
		0.0015	0.0018
		0.0015	0.0018
		0.0015	0.0018
		0.0015	0.0018
		0.0015	0.0018
		0.0015	0.0018
		0.0015	0.0018
		0.0015	0.0018
		0.0015	0.0018
		0.0015	0.0018
		0.0014	0.0018
		0.0014	0.0017
		0.0014	0.0017
		0.0014	0.0017
		0.0014	0.0017
		0.0014	0.0017
		0.0013	0.0017
		0.0013	0.0017
		0.0013	0.0017
		0.0013	0.0017
		0.0013	0.0017
		0.0013	0.0017
		0.0013	0.0017
		0.0013	0.0017
		0.0013	0.0017
		0.0013	0.0017
		0.0013	0.0017
		0.0013	0.0017
		0.0013	0.0016
		0.0013	0.0016
		0.0013	0.0016
		0.0013	0.0016
		0.0012	0.0016
		0.0012	0.0016
		0.0012	0.0016
		0.0012	0.0016
		0.0012	0.0016
		0.0012	0.0016
		0.0012	0.0016
		0.0012	0.0016
		0.0012	0.0016
		0.0012	0.0016
		0.0012	0.0016
		0.0011	0.0016
		0.0011	0.0016
		0.0011	0.0015
		0.0011	0.0015
		0.0011	0.0015
		0.0011	0.0015
		0.0011	0.0015
		0.0011	0.0015
		0.0011	0.0015
		0.0011	0.0015
		0.0011	0.0015
		0.0011	0.0015
		0.0011	0.0015
		0.0011	0.0015
		0.0011	0.0015
		0.0011	0.0015
		0.0011	0.0014
		0.0011	0.0014
		0.001	0.0014
		0.001	0.0014
		0.001	0.0014
		0.001	0.0014
		0.001	0.0014
		0.001	0.0014
		0.001	0.0014
		0.001	0.0014
		0.001	0.0014
		0.001	0.0014
		0.001	0.0014
		0.0009	0.0014
		0.0009	0.0014
		0.0009	0.0014
		0.0009	0.0013
		0.0009	0.0013
		0.0009	0.0013
		0.0009	0.0013
		0.0009	0.0013
		0.0009	0.0013
		0.0009	0.0013
		0.0009	0.0013
		0.0008	0.0013
		0.0008	0.0013
		0.0008	0.0013
		0.0008	0.0013
		0.0008	0.0013
		0.0008	0.0013
		0.0008	0.0013
		0.0008	0.0013
		0.0008	0.0013
		0.0008	0.0013
		0.0008	0.0013
		0.0007	0.0013
		0.0007	0.0012
		0.0007	0.0012
		0.0007	0.0012
		0.0007	0.0012
		0.0007	0.0012
		0.0007	0.0012
		0.0007	0.0012
		0.0007	0.0012
		0.0007	0.0012
		0.0007	0.0012
		0.0006	0.0012
		0.0006	0.0012
		0.0006	0.0012
		0.0006	0.0012
		0.0006	0.0012
		0.0006	0.0012
		0.0006	0.0012
		0.0006	0.0012
		0.0006	0.0012
		0.0005	0.0012
		0.0005	0.0012
		0.0005	0.0012
		0.0005	0.0011
		0.0005	0.0011
		0.0005	0.0011
		0.0005	0.0011
		0.0005	0.0011
		0.0004	0.0011
		0.0004	0.0011
		0.0004	0.0011
		0.0004	0.0011
		0.0004	0.0011
		0.0004	0.0011
		0.0004	0.0011
		0.0004	0.0011
		0.0004	0.0011
		0.0004	0.0011
		0.0003	0.0011
		0.0003	0.0011
		0.0003	0.0011
		0.0003	0.001
		0.0003	0.001
		0.0003	0.001
		0.0003	0.001
		0.0003	0.001
		0.0003	0.001
		0.0003	0.001
		0.0002	0.001
		0.0002	0.001
		0.0002	0.001
		0.0002	0.001
		0.0002	0.001
		0.0002	0.001
		0.0002	0.001
			0.001
			0.001
			0.001
			0.001
			0.0009
			0.0009
			0.0009
			0.0009
			0.0009
			0.0009
			0.0009
			0.0009
			0.0009
			0.0009
			0.0009
			0.0009
			0.0008
			0.0008
			0.0008
			0.0008
			0.0008
			0.0008
			0.0008
			0.0008
			0.0008
			0.0008
			0.0008
			0.0008
			0.0008
			0.0008
			0.0008
			0.0008
			0.0007
			0.0007
			0.0007
			0.0007
			0.0007
			0.0007
			0.0007
			0.0007
			0.0007
			0.0007
			0.0007
			0.0007
			0.0007
			0.0007
			0.0007
			0.0007
			0.0007
			0.0007
			0.0007
			0.0007
			0.0006
			0.0006
			0.0006
			0.0006
			0.0006
			0.0006
			0.0006
			0.0006
			0.0006
			0.0006
			0.0006
			0.0006
			0.0006
			0.0006
			0.0006
			0.0006
			0.0006
			0.0006
			0.0005
			0.0005
			0.0005
			0.0005
			0.0005
			0.0005
			0.0005
			0.0005
			0.0005
			0.0004
			0.0004
			0.0004
			0.0004
			0.0004
			0.0004
			0.0004
			0.0004
			0.0004
			0.0004
			0.0004
			0.0004
			0.0003
			0.0003
			0.0003
			0.0003
			0.0003
			0.0003
			0.0003
			0.0002
			0.0002
			0.0002
			0.0002
			0.0002
			0.0002
			0.0002
			0.0002
			0.0002
			0.0002

## Sheet: PI(4,5)P2_after
	cell#1	cell#2	cell#3	cell#4	cell#5	cell#6	cell#7	cell#8	cell#9	cell#10
cell area	746.046	626.845	631.597	711.774	734.205	727.043	644.586	795.227	587.145	515.738
cluster areas	0.2484	0.2441	0.2457	0.2373	0.2427	0.2451	0.2497	0.2483	0.2457	0.2493
	0.248	0.2395	0.2281	0.2319	0.242	0.2383	0.2482	0.247	0.2392	0.2424
	0.2405	0.2286	0.2129	0.2302	0.2417	0.2382	0.2412	0.2442	0.2334	0.2413
	0.2403	0.2212	0.211	0.2223	0.2415	0.238	0.2387	0.2405	0.2313	0.2412
	0.232	0.2199	0.2078	0.2121	0.2403	0.2371	0.23	0.2393	0.2244	0.237
	0.2307	0.2182	0.2043	0.2011	0.239	0.226	0.2215	0.2382	0.2228	0.2313
	0.2289	0.1942	0.204	0.201	0.238	0.2214	0.2178	0.2378	0.2207	0.2313
	0.227	0.1869	0.1983	0.1849	0.2363	0.22	0.2178	0.2362	0.2127	0.2104
	0.2249	0.1818	0.1972	0.1839	0.2274	0.2032	0.2172	0.2327	0.2119	0.2054
	0.2142	0.1752	0.1931	0.1799	0.2255	0.2013	0.2165	0.2311	0.2113	0.199
	0.2119	0.169	0.1913	0.1789	0.2238	0.2	0.2131	0.2287	0.2063	0.1942
	0.208	0.1686	0.1891	0.177	0.2209	0.1953	0.2067	0.2273	0.1988	0.1885
	0.2077	0.1675	0.188	0.1752	0.2206	0.1875	0.2039	0.2193	0.1917	0.188
	0.199	0.1628	0.1819	0.1743	0.2173	0.1871	0.1998	0.2186	0.191	0.1873
	0.1982	0.1615	0.1801	0.1733	0.2168	0.1851	0.1997	0.2162	0.1897	0.1828
	0.1981	0.1601	0.1794	0.1699	0.2159	0.1819	0.1994	0.2159	0.1627	0.1819
	0.1973	0.1541	0.1749	0.166	0.2109	0.1771	0.198	0.2149	0.159	0.1818
	0.1967	0.148	0.1701	0.1614	0.2075	0.177	0.1965	0.2126	0.1589	0.1792
	0.1956	0.1463	0.1648	0.1582	0.205	0.1738	0.1947	0.2117	0.1587	0.1715
	0.1917	0.1428	0.1599	0.1582	0.2014	0.1729	0.1929	0.2101	0.1578	0.1628
	0.1915	0.1417	0.1598	0.1547	0.1995	0.1637	0.1922	0.2095	0.1571	0.1585
	0.1883	0.1401	0.1582	0.1533	0.1975	0.1626	0.1886	0.2094	0.1459	0.1576
	0.1845	0.1356	0.1535	0.1528	0.1935	0.1615	0.1841	0.2061	0.1458	0.1555
	0.1817	0.1349	0.1489	0.142	0.1906	0.1582	0.1758	0.204	0.1429	0.1539
	0.1808	0.1335	0.1485	0.14	0.1838	0.1581	0.1673	0.2023	0.142	0.1514
	0.1736	0.129	0.1476	0.14	0.1818	0.1521	0.1647	0.2014	0.1413	0.1498
	0.1729	0.1268	0.1467	0.1379	0.1787	0.1471	0.1629	0.2004	0.1358	0.1498
	0.1714	0.1153	0.1389	0.1336	0.1777	0.1444	0.1605	0.1991	0.1354	0.1331
	0.1712	0.1132	0.1294	0.1287	0.1744	0.1351	0.159	0.1988	0.1344	0.131
	0.1697	0.1115	0.1266	0.1267	0.1729	0.1339	0.1581	0.198	0.1292	0.1293
	0.1672	0.1103	0.1238	0.1266	0.1727	0.1334	0.1555	0.1958	0.1279	0.1249
	0.164	0.1101	0.1234	0.1264	0.167	0.1319	0.1522	0.1944	0.1259	0.1245
	0.1596	0.1089	0.1215	0.1255	0.1666	0.1317	0.1487	0.1862	0.1047	0.1198
	0.1509	0.1041	0.1118	0.1252	0.1663	0.1264	0.1466	0.1822	0.1013	0.1155
	0.1504	0.1017	0.1078	0.125	0.1627	0.1254	0.1446	0.1816	0.1007	0.1148
	0.149	0.1011	0.1052	0.1213	0.1575	0.1251	0.1436	0.1815	0.0968	0.1142
	0.146	0.0982	0.104	0.1196	0.1533	0.1236	0.1433	0.1807	0.0944	0.1131
	0.1416	0.0945	0.0925	0.1177	0.15	0.1231	0.139	0.1801	0.0933	0.1117
	0.1414	0.0929	0.0915	0.1165	0.1497	0.1186	0.1369	0.1798	0.093	0.1093
	0.1398	0.0895	0.0893	0.1145	0.1482	0.1163	0.1344	0.1795	0.0926	0.1065
	0.1375	0.0867	0.0855	0.1145	0.143	0.1149	0.1319	0.1782	0.0866	0.1065
	0.1296	0.084	0.0826	0.1112	0.1422	0.1138	0.1245	0.1778	0.0859	0.1012
	0.1279	0.08	0.0808	0.11	0.1381	0.1117	0.1227	0.1756	0.0811	0.1004
	0.1271	0.0794	0.0784	0.1082	0.1283	0.1113	0.1209	0.1742	0.0795	0.0985
	0.1229	0.0768	0.0765	0.1081	0.1196	0.1106	0.1195	0.1719	0.078	0.0976
	0.1221	0.0754	0.0749	0.1062	0.1183	0.1088	0.119	0.1702	0.0771	0.0935
	0.122	0.0732	0.0744	0.1035	0.1139	0.1051	0.1143	0.1693	0.075	0.0805
	0.1211	0.0723	0.074	0.1033	0.1123	0.1049	0.1135	0.1663	0.0725	0.0798
	0.1199	0.0706	0.0731	0.1015	0.1101	0.1034	0.1131	0.1645	0.0711	0.0784
	0.1171	0.0703	0.073	0.1003	0.1098	0.1029	0.1125	0.1619	0.0707	0.0772
	0.1147	0.0688	0.0727	0.0993	0.107	0.1026	0.111	0.1615	0.0705	0.0763
	0.1145	0.0679	0.0696	0.0976	0.1058	0.1018	0.1105	0.1604	0.0671	0.0754
	0.112	0.0674	0.0669	0.0975	0.1034	0.1016	0.1089	0.1602	0.0667	0.0736
	0.1114	0.0663	0.0662	0.0973	0.1022	0.1002	0.1077	0.1599	0.0661	0.0732
	0.1089	0.0648	0.0592	0.0973	0.1018	0.0967	0.1036	0.1594	0.0646	0.0721
	0.1079	0.064	0.0589	0.0972	0.1017	0.0962	0.1016	0.1515	0.0644	0.0716
	0.1076	0.0635	0.0584	0.0969	0.1012	0.096	0.0995	0.1512	0.0638	0.0692
	0.106	0.0624	0.0566	0.0961	0.1012	0.0953	0.099	0.1511	0.0637	0.0676
	0.1059	0.0622	0.0564	0.095	0.0997	0.095	0.0976	0.1501	0.0621	0.0673
	0.1051	0.0612	0.0536	0.0933	0.0969	0.0948	0.095	0.146	0.061	0.0672
	0.1037	0.0589	0.0527	0.0932	0.0963	0.0929	0.0937	0.1458	0.0591	0.0653
	0.1029	0.0569	0.0508	0.089	0.0923	0.0907	0.0925	0.1458	0.058	0.0648
	0.0997	0.0565	0.0506	0.0884	0.0903	0.0905	0.0922	0.1449	0.0579	0.0639
	0.0985	0.0552	0.0504	0.0884	0.0894	0.0888	0.0921	0.1439	0.0572	0.0603
	0.0972	0.0548	0.0502	0.088	0.0891	0.0857	0.0888	0.1434	0.0542	0.0601
	0.093	0.0547	0.0483	0.0876	0.088	0.0854	0.0843	0.1432	0.0524	0.0585
	0.0922	0.0527	0.045	0.0863	0.0866	0.0824	0.0822	0.1406	0.0515	0.0577
	0.0913	0.0525	0.0448	0.0842	0.0866	0.0785	0.0815	0.1377	0.0514	0.0576
	0.0856	0.0514	0.044	0.0828	0.0846	0.0785	0.0807	0.1372	0.0508	0.0575
	0.0851	0.0486	0.0439	0.0827	0.0837	0.0752	0.0804	0.137	0.0504	0.0575
	0.085	0.0485	0.0432	0.0827	0.0817	0.075	0.0801	0.1369	0.0503	0.0574
	0.0831	0.0443	0.0431	0.0816	0.0804	0.0742	0.0799	0.1348	0.0489	0.0561
	0.082	0.0441	0.0427	0.0802	0.0775	0.0735	0.0795	0.1337	0.0487	0.0547
	0.0819	0.0407	0.0404	0.0787	0.0745	0.0716	0.0767	0.1333	0.0473	0.0545
	0.08	0.0407	0.0404	0.0781	0.0712	0.0681	0.072	0.1332	0.0469	0.0528
	0.0767	0.0405	0.0402	0.0759	0.0705	0.0673	0.0719	0.1308	0.0466	0.0518
	0.0754	0.0396	0.04	0.0747	0.07	0.0667	0.0712	0.1299	0.0462	0.0515
	0.0738	0.0387	0.0399	0.0744	0.0698	0.0665	0.0709	0.1293	0.0449	0.0513
	0.0731	0.0381	0.0398	0.0734	0.0684	0.0661	0.07	0.1287	0.0447	0.0482
	0.0731	0.0371	0.0393	0.0725	0.0659	0.066	0.068	0.1277	0.0441	0.0459
	0.0726	0.037	0.0386	0.0724	0.0655	0.0659	0.067	0.1246	0.0431	0.0449
	0.0718	0.036	0.0383	0.0716	0.0655	0.0658	0.065	0.1238	0.0429	0.0448
	0.0707	0.0358	0.0379	0.0715	0.0644	0.0639	0.0633	0.1221	0.0423	0.0448
	0.0695	0.0355	0.0374	0.0712	0.0629	0.0631	0.0627	0.1217	0.042	0.0446
	0.0693	0.0351	0.0374	0.0694	0.0625	0.0629	0.0626	0.1214	0.042	0.0421
	0.0685	0.0341	0.0371	0.0681	0.0614	0.0618	0.0624	0.1203	0.0407	0.0421
	0.0675	0.0333	0.037	0.0675	0.0611	0.0609	0.0583	0.1196	0.0392	0.042
	0.0656	0.0331	0.0369	0.0673	0.0597	0.0605	0.0572	0.119	0.0387	0.0415
	0.0652	0.0323	0.0367	0.0657	0.0595	0.0603	0.0557	0.1149	0.0381	0.041
	0.0641	0.0321	0.0365	0.0636	0.0594	0.0591	0.0556	0.1138	0.0378	0.0407
	0.0635	0.0308	0.0364	0.062	0.0577	0.0566	0.0553	0.1132	0.0376	0.0406
	0.0628	0.0305	0.0358	0.0616	0.0575	0.0563	0.0544	0.1131	0.0366	0.0405
	0.0619	0.0299	0.0357	0.0595	0.056	0.0558	0.0535	0.1129	0.0333	0.0398
	0.061	0.0291	0.0347	0.0594	0.0559	0.0557	0.053	0.1126	0.0331	0.0397
	0.0601	0.0288	0.0343	0.058	0.0558	0.0552	0.0523	0.1094	0.0329	0.039
	0.0589	0.0287	0.0333	0.0577	0.0558	0.0551	0.0498	0.1086	0.0326	0.0381
	0.0586	0.0275	0.0323	0.0566	0.0556	0.0551	0.0497	0.1081	0.0323	0.0379
	0.0583	0.0265	0.0321	0.0566	0.0552	0.0546	0.0493	0.107	0.0317	0.0368
	0.0563	0.0262	0.0319	0.0551	0.0544	0.0531	0.0452	0.1064	0.0314	0.0364
	0.0549	0.0256	0.0304	0.0548	0.0519	0.0514	0.0449	0.104	0.0307	0.0362
	0.0549	0.0255	0.0302	0.0538	0.0513	0.0503	0.044	0.1029	0.0305	0.036
	0.0526	0.0253	0.0284	0.0534	0.0512	0.0503	0.0432	0.1016	0.0282	0.036
	0.0524	0.0249	0.0273	0.053	0.0509	0.0498	0.0416	0.1002	0.0276	0.0358
	0.0524	0.0248	0.0263	0.0518	0.0501	0.0491	0.0408	0.0974	0.0273	0.0358
	0.0517	0.024	0.0262	0.0491	0.0497	0.0478	0.0403	0.0971	0.0269	0.0355
	0.0516	0.0239	0.0254	0.049	0.0496	0.046	0.0403	0.0967	0.0263	0.0354
	0.0502	0.0238	0.0249	0.0487	0.0495	0.045	0.0392	0.0956	0.0262	0.0346
	0.0501	0.0237	0.0247	0.0484	0.0489	0.045	0.0379	0.0956	0.0261	0.0345
	0.0488	0.0235	0.0247	0.0483	0.0486	0.044	0.0376	0.0952	0.0257	0.0344
	0.0481	0.0234	0.0246	0.0482	0.0483	0.0435	0.037	0.0946	0.0256	0.0344
	0.0479	0.0233	0.0246	0.0471	0.048	0.0428	0.036	0.093	0.0251	0.0344
	0.0477	0.0225	0.0243	0.0471	0.0464	0.0426	0.0355	0.0925	0.0251	0.0337
	0.0468	0.0217	0.0239	0.0465	0.0461	0.0424	0.0352	0.0913	0.025	0.0336
	0.0462	0.0211	0.0235	0.0454	0.0451	0.0421	0.035	0.0911	0.0248	0.0335
	0.046	0.0209	0.023	0.0451	0.044	0.0417	0.0342	0.0864	0.0248	0.0326
	0.046	0.0209	0.0227	0.0438	0.0438	0.0404	0.0337	0.0863	0.0245	0.0323
	0.0457	0.0209	0.0227	0.043	0.0435	0.0404	0.0335	0.0853	0.0243	0.0318
	0.0452	0.0206	0.022	0.0424	0.0433	0.0401	0.0334	0.0846	0.0242	0.0317
	0.0442	0.02	0.0216	0.0422	0.0427	0.0396	0.0332	0.0839	0.0242	0.0312
	0.0438	0.0198	0.0208	0.042	0.0427	0.0387	0.033	0.083	0.024	0.0309
	0.0432	0.0195	0.0206	0.0419	0.0425	0.0386	0.0329	0.0829	0.0237	0.0305
	0.0426	0.0194	0.0202	0.0418	0.0421	0.0377	0.0327	0.0827	0.0231	0.0304
	0.0422	0.0192	0.0201	0.0416	0.042	0.0374	0.0324	0.0814	0.023	0.03
	0.0418	0.0191	0.0198	0.0407	0.0419	0.0373	0.0319	0.0811	0.023	0.0295
	0.041	0.0188	0.0196	0.0385	0.0416	0.0369	0.0319	0.0807	0.0226	0.029
	0.0407	0.0185	0.0196	0.0377	0.0414	0.0356	0.0319	0.0806	0.0224	0.0279
	0.0407	0.0185	0.0191	0.0372	0.0406	0.0355	0.0311	0.08	0.0222	0.0275
	0.0398	0.0183	0.0188	0.0368	0.0397	0.0353	0.0307	0.0794	0.0218	0.0268
	0.0397	0.0182	0.0188	0.0355	0.0396	0.0347	0.029	0.079	0.0218	0.026
	0.0389	0.0182	0.0185	0.0351	0.0395	0.0343	0.0289	0.0789	0.0218	0.0259
	0.0384	0.018	0.0182	0.0348	0.0391	0.034	0.0289	0.0782	0.0214	0.0249
	0.0383	0.0176	0.0182	0.0347	0.0389	0.0336	0.0287	0.0776	0.0213	0.024
	0.0382	0.0174	0.0182	0.0346	0.0389	0.0329	0.0282	0.0775	0.0212	0.024
	0.0375	0.0172	0.0182	0.0345	0.0388	0.0329	0.0276	0.0765	0.021	0.024
	0.0368	0.0172	0.018	0.0344	0.0388	0.0323	0.0271	0.0765	0.0208	0.0239
	0.0366	0.017	0.018	0.0344	0.0383	0.0319	0.027	0.0748	0.0207	0.0237
	0.036	0.017	0.0177	0.0344	0.0376	0.0317	0.0266	0.0728	0.0207	0.0235
	0.0359	0.0167	0.0175	0.0343	0.0374	0.0317	0.0264	0.0725	0.0203	0.0233
	0.0351	0.0164	0.0174	0.0341	0.0372	0.0315	0.0262	0.0723	0.0203	0.0233
	0.0349	0.0161	0.017	0.0338	0.0369	0.0311	0.0259	0.0723	0.0201	0.0231
	0.0347	0.0161	0.0166	0.0338	0.0363	0.0307	0.0257	0.0717	0.02	0.023
	0.0347	0.016	0.0165	0.0336	0.0362	0.0305	0.0256	0.0711	0.0198	0.0228
	0.0342	0.016	0.0164	0.0333	0.0357	0.0298	0.0252	0.0709	0.0197	0.0227
	0.0338	0.0157	0.0161	0.033	0.0356	0.0294	0.0251	0.0706	0.0196	0.0226
	0.0335	0.0155	0.0161	0.0328	0.0356	0.0291	0.025	0.0704	0.0195	0.022
	0.0333	0.0155	0.016	0.0325	0.0354	0.0288	0.0249	0.0698	0.0192	0.0216
	0.0329	0.0154	0.016	0.0323	0.0349	0.028	0.0247	0.0683	0.0188	0.0214
	0.0328	0.0152	0.0159	0.0318	0.0339	0.0278	0.0245	0.0682	0.0185	0.0213
	0.0326	0.0152	0.0158	0.0316	0.0337	0.0274	0.0242	0.0679	0.0184	0.0207
	0.0325	0.0152	0.0158	0.0315	0.0337	0.0271	0.0241	0.0672	0.0184	0.0201
	0.0325	0.0151	0.0157	0.0312	0.0335	0.027	0.024	0.0666	0.0181	0.02
	0.0322	0.0149	0.0153	0.0311	0.0333	0.026	0.0238	0.0664	0.0179	0.0199
	0.032	0.0149	0.0153	0.0309	0.0331	0.0259	0.0237	0.066	0.0178	0.0199
	0.0317	0.0147	0.0152	0.0307	0.0329	0.0257	0.0236	0.0636	0.0176	0.0197
	0.0316	0.0145	0.0151	0.0307	0.0328	0.0256	0.0231	0.0633	0.0173	0.0187
	0.0315	0.0144	0.0147	0.0306	0.0326	0.0254	0.0227	0.063	0.017	0.0187
	0.0315	0.0144	0.0146	0.0305	0.0324	0.0253	0.0226	0.0625	0.0168	0.0185
	0.0312	0.0143	0.0146	0.0304	0.032	0.0251	0.0223	0.0621	0.0168	0.0184
	0.0311	0.0141	0.0144	0.0301	0.0315	0.0246	0.0223	0.0618	0.0167	0.0183
	0.0311	0.0138	0.0143	0.03	0.0315	0.0245	0.0223	0.0612	0.0167	0.018
	0.0309	0.0132	0.0143	0.0299	0.031	0.0244	0.0219	0.0611	0.0167	0.0175
	0.0308	0.0132	0.0143	0.0298	0.031	0.0241	0.0218	0.0607	0.0166	0.017
	0.0306	0.0132	0.0142	0.0297	0.0308	0.0237	0.0217	0.0603	0.0165	0.0164
	0.0306	0.0131	0.0142	0.0293	0.0301	0.0235	0.0217	0.0599	0.0163	0.0163
	0.0305	0.013	0.0141	0.0292	0.0301	0.0234	0.0214	0.0599	0.0161	0.0162
	0.0304	0.0129	0.0137	0.029	0.03	0.0232	0.0214	0.0593	0.016	0.0161
	0.0301	0.0129	0.0136	0.029	0.03	0.023	0.0212	0.0587	0.016	0.0158
	0.0298	0.0127	0.0136	0.0288	0.0297	0.023	0.0211	0.0579	0.0155	0.0157
	0.0296	0.0126	0.0133	0.0287	0.0293	0.0229	0.021	0.0574	0.0155	0.0157
	0.0295	0.0125	0.0131	0.0284	0.0293	0.0229	0.0203	0.0571	0.0155	0.0157
	0.0294	0.0124	0.013	0.0283	0.0289	0.0228	0.0203	0.0569	0.0155	0.0156
	0.0292	0.0122	0.013	0.0282	0.0288	0.0225	0.0202	0.0553	0.0154	0.0155
	0.0287	0.0122	0.0129	0.0274	0.0276	0.0224	0.0201	0.0553	0.0153	0.0154
	0.0282	0.012	0.0129	0.0272	0.0271	0.0223	0.0197	0.0551	0.0153	0.0151
	0.0274	0.012	0.0128	0.027	0.0266	0.0221	0.0193	0.0551	0.0152	0.0151
	0.0274	0.012	0.0124	0.0269	0.0265	0.0221	0.0188	0.0548	0.0151	0.0148
	0.0272	0.012	0.0124	0.0264	0.0265	0.0217	0.0187	0.0548	0.015	0.0145
	0.0269	0.0119	0.0123	0.0261	0.0263	0.0215	0.0187	0.0545	0.015	0.0143
	0.0266	0.0118	0.0122	0.0259	0.0262	0.0213	0.0182	0.054	0.015	0.0143
	0.0265	0.0116	0.0121	0.0257	0.0258	0.0211	0.0182	0.0537	0.0148	0.0143
	0.0265	0.0116	0.0114	0.0255	0.0257	0.021	0.0181	0.0537	0.0146	0.0141
	0.0263	0.0115	0.0113	0.0249	0.0257	0.0209	0.0179	0.0536	0.0144	0.014
	0.026	0.0113	0.0113	0.0248	0.0252	0.0199	0.017	0.0534	0.0144	0.0139
	0.0259	0.0112	0.0112	0.0248	0.0251	0.0198	0.0169	0.0531	0.014	0.0138
	0.0255	0.0112	0.011	0.0247	0.0249	0.0197	0.0167	0.0525	0.0136	0.0138
	0.0254	0.0112	0.0109	0.0247	0.0249	0.0195	0.0166	0.052	0.0136	0.0138
	0.0251	0.0106	0.0108	0.0243	0.0248	0.0193	0.0166	0.0517	0.0135	0.0138
	0.0248	0.0105	0.0108	0.0239	0.0244	0.0191	0.0162	0.0517	0.0133	0.0137
	0.0245	0.0105	0.0108	0.0236	0.024	0.019	0.0161	0.0514	0.0133	0.0137
	0.0245	0.0103	0.0108	0.0235	0.0237	0.0187	0.0161	0.0511	0.0132	0.0137
	0.0244	0.0103	0.0107	0.0232	0.0234	0.0187	0.016	0.0511	0.0131	0.0136
	0.0241	0.0102	0.0107	0.0232	0.0233	0.0187	0.016	0.0505	0.0128	0.0134
	0.0239	0.0101	0.0106	0.023	0.0232	0.0186	0.0159	0.0501	0.0126	0.0132
	0.0238	0.0098	0.0104	0.0229	0.0229	0.0184	0.0158	0.0492	0.0126	0.0132
	0.0236	0.0098	0.0104	0.0228	0.0228	0.0184	0.0156	0.0488	0.0125	0.0131
	0.0235	0.0097	0.0103	0.0228	0.0228	0.0184	0.0156	0.0483	0.0122	0.0131
	0.0233	0.0097	0.0103	0.0221	0.0224	0.0183	0.0154	0.0482	0.0119	0.013
	0.0228	0.0095	0.0102	0.0219	0.022	0.0182	0.0152	0.0481	0.0118	0.0129
	0.0228	0.0095	0.0101	0.0216	0.022	0.0181	0.0151	0.0477	0.0118	0.0129
	0.0228	0.0094	0.0101	0.0213	0.0219	0.018	0.015	0.0476	0.0118	0.0127
	0.0228	0.0094	0.01	0.0212	0.0218	0.018	0.0149	0.047	0.0118	0.0126
	0.0227	0.0094	0.01	0.0211	0.0215	0.018	0.0145	0.046	0.0117	0.0122
	0.0226	0.0094	0.01	0.0211	0.0209	0.018	0.0145	0.0458	0.0117	0.0121
	0.0225	0.0093	0.01	0.021	0.0208	0.0178	0.0142	0.0457	0.0116	0.0118
	0.0224	0.0091	0.0099	0.0208	0.0208	0.0177	0.0139	0.045	0.0115	0.0118
	0.0222	0.0091	0.0098	0.0203	0.0203	0.0172	0.0139	0.0447	0.0115	0.0117
	0.0222	0.0091	0.0096	0.0199	0.0202	0.017	0.0134	0.0432	0.0114	0.0117
	0.0221	0.009	0.0095	0.0197	0.0202	0.0168	0.0133	0.0431	0.011	0.0116
	0.0219	0.009	0.0085	0.0196	0.0202	0.0167	0.0132	0.0429	0.0109	0.0115
	0.0219	0.009	0.0084	0.0196	0.0201	0.0167	0.0131	0.0428	0.0108	0.0115
	0.0215	0.0089	0.0083	0.0195	0.02	0.0166	0.0131	0.0427	0.0108	0.0113
	0.0214	0.0089	0.0083	0.0191	0.0199	0.0163	0.0127	0.042	0.0106	0.011
	0.0213	0.0089	0.0082	0.0188	0.0193	0.0163	0.0127	0.0417	0.0106	0.011
	0.0212	0.0089	0.0081	0.0187	0.0191	0.0163	0.0127	0.0416	0.0104	0.0109
	0.0209	0.0089	0.0081	0.0184	0.0191	0.0162	0.0124	0.0416	0.0101	0.0107
	0.0208	0.0088	0.008	0.0182	0.0191	0.0161	0.0124	0.041	0.01	0.0107
	0.0208	0.0088	0.0078	0.0181	0.0191	0.0161	0.0123	0.0408	0.0099	0.0107
	0.0207	0.0087	0.0078	0.018	0.0191	0.0157	0.0122	0.0404	0.0099	0.0106
	0.02	0.0086	0.0077	0.0178	0.0191	0.0155	0.012	0.0404	0.0097	0.0106
	0.0198	0.0086	0.0075	0.0171	0.0191	0.0153	0.0119	0.0403	0.0097	0.0106
	0.0197	0.0085	0.0073	0.0171	0.0187	0.0152	0.0118	0.04	0.0097	0.0105
	0.0194	0.0083	0.0072	0.017	0.0185	0.0151	0.0118	0.04	0.0096	0.0105
	0.0189	0.0082	0.0071	0.017	0.0185	0.015	0.0118	0.0398	0.0096	0.0104
	0.0185	0.0082	0.007	0.0168	0.0184	0.015	0.0118	0.0395	0.0096	0.0102
	0.0184	0.0081	0.007	0.0168	0.0183	0.0148	0.0115	0.0393	0.0095	0.0101
	0.0183	0.0081	0.0069	0.0164	0.0182	0.0143	0.0113	0.0384	0.0093	0.0099
	0.0183	0.008	0.0067	0.0163	0.0182	0.0143	0.0113	0.038	0.0092	0.0098
	0.0183	0.0079	0.0065	0.0162	0.0182	0.0141	0.011	0.0379	0.0092	0.0098
	0.0182	0.0078	0.0065	0.016	0.0181	0.014	0.011	0.0376	0.0091	0.0098
	0.0181	0.0078	0.0065	0.0159	0.018	0.0138	0.0108	0.0375	0.009	0.0098
	0.018	0.0078	0.0064	0.0157	0.018	0.0138	0.0107	0.0374	0.009	0.0098
	0.018	0.0078	0.0064	0.0157	0.0179	0.0138	0.0107	0.0373	0.0089	0.0098
	0.0179	0.0077	0.0064	0.0157	0.0179	0.0138	0.0105	0.0372	0.0088	0.0096
	0.0178	0.0076	0.0063	0.0157	0.0178	0.0138	0.0105	0.0372	0.0087	0.0096
	0.0175	0.0075	0.0062	0.0156	0.0177	0.0137	0.0105	0.0371	0.0085	0.0094
	0.0175	0.0074	0.0062	0.0156	0.0176	0.0137	0.01	0.0363	0.0085	0.0094
	0.0174	0.0073	0.0061	0.0154	0.0175	0.0132	0.0099	0.0358	0.0085	0.0094
	0.0173	0.0073	0.0059	0.0154	0.0173	0.0132	0.0098	0.0358	0.0084	0.0094
	0.0171	0.0072	0.0056	0.0152	0.0173	0.0132	0.0098	0.0354	0.0084	0.0094
	0.017	0.0072	0.0056	0.0151	0.017	0.013	0.0096	0.0352	0.0084	0.0093
	0.017	0.0071	0.0055	0.015	0.0169	0.0128	0.0096	0.0351	0.0083	0.0092
	0.0168	0.0071	0.0054	0.015	0.0163	0.0123	0.0095	0.0343	0.0082	0.0092
	0.0168	0.0071	0.0053	0.0149	0.0161	0.0123	0.0095	0.0338	0.0081	0.009
	0.0167	0.007	0.0053	0.0149	0.016	0.0123	0.0092	0.0337	0.0081	0.0089
	0.0166	0.007	0.0053	0.0148	0.0158	0.0122	0.0092	0.0336	0.008	0.0089
	0.0162	0.007	0.0053	0.0147	0.0158	0.012	0.009	0.0334	0.008	0.0088
	0.0162	0.007	0.0052	0.0144	0.0154	0.0119	0.009	0.0334	0.008	0.0088
	0.0162	0.007	0.0052	0.0142	0.0153	0.0119	0.0089	0.0333	0.0079	0.0087
	0.0162	0.0069	0.0051	0.0141	0.0152	0.0118	0.0088	0.0332	0.0078	0.0087
	0.016	0.0069	0.005	0.014	0.0152	0.0117	0.0088	0.0331	0.0077	0.0086
	0.016	0.0069	0.005	0.0137	0.015	0.0114	0.0087	0.0326	0.0076	0.0085
	0.0157	0.0067	0.0049	0.0137	0.015	0.0114	0.0086	0.0326	0.0075	0.0085
	0.0156	0.0067	0.0049	0.0136	0.0147	0.0114	0.0086	0.0324	0.0074	0.0084
	0.0156	0.0066	0.0049	0.0135	0.0146	0.0112	0.0085	0.0323	0.0074	0.0083
	0.0153	0.0066	0.0049	0.0135	0.0146	0.0111	0.0084	0.0323	0.0074	0.0083
	0.0149	0.0066	0.0048	0.0134	0.0145	0.0111	0.0084	0.0323	0.0074	0.0082
	0.0148	0.0065	0.0048	0.0133	0.0144	0.0111	0.0083	0.032	0.0074	0.0082
	0.0148	0.0063	0.0048	0.0133	0.0143	0.0106	0.0082	0.0319	0.0073	0.008
	0.0148	0.0063	0.0048	0.0133	0.0143	0.0106	0.0081	0.0317	0.0072	0.008
	0.0145	0.0063	0.0048	0.0133	0.0142	0.0105	0.0081	0.0315	0.0072	0.008
	0.0144	0.0063	0.0047	0.0132	0.0142	0.0104	0.0079	0.0315	0.0072	0.008
	0.0142	0.0062	0.0047	0.0132	0.0141	0.0103	0.0079	0.0313	0.0071	0.008
	0.0142	0.0062	0.0046	0.013	0.0139	0.0103	0.0078	0.0311	0.0071	0.0077
	0.014	0.0062	0.0045	0.013	0.0139	0.0101	0.0077	0.0309	0.0071	0.0075
	0.014	0.0061	0.0045	0.013	0.0138	0.0101	0.0076	0.0306	0.0071	0.0075
	0.0139	0.0061	0.0045	0.0128	0.0137	0.0101	0.0076	0.0306	0.007	0.0074
	0.0139	0.006	0.0045	0.0127	0.0136	0.0101	0.0076	0.0305	0.007	0.0073
	0.0138	0.0059	0.0045	0.0125	0.0136	0.0099	0.0075	0.0303	0.007	0.0073
	0.0137	0.0059	0.0045	0.0125	0.0135	0.0099	0.0074	0.0299	0.0069	0.0072
	0.0136	0.0059	0.0045	0.0124	0.0132	0.0098	0.0074	0.0297	0.0068	0.0072
	0.0136	0.0058	0.0044	0.0121	0.013	0.0098	0.0074	0.0292	0.0067	0.0072
	0.0135	0.0058	0.0044	0.0121	0.0128	0.0096	0.0073	0.0288	0.0066	0.0072
	0.0135	0.0057	0.0044	0.0119	0.0128	0.0096	0.0071	0.0287	0.0066	0.007
	0.0135	0.0057	0.0043	0.0118	0.0124	0.0096	0.0071	0.0285	0.0064	0.007
	0.0135	0.0056	0.0043	0.0117	0.0124	0.0095	0.0071	0.0279	0.0064	0.007
	0.0134	0.0056	0.0043	0.0117	0.0123	0.0095	0.0071	0.0278	0.0064	0.007
	0.0132	0.0056	0.0042	0.0117	0.0122	0.0095	0.007	0.0274	0.0063	0.007
	0.0131	0.0056	0.0041	0.0115	0.0119	0.0095	0.007	0.0272	0.0062	0.0068
	0.013	0.0056	0.004	0.0114	0.0117	0.0095	0.0068	0.0272	0.0062	0.0068
	0.013	0.0056	0.004	0.0114	0.0115	0.0094	0.0066	0.0271	0.0062	0.0067
	0.0129	0.0056	0.004	0.0113	0.0113	0.0094	0.0066	0.027	0.0062	0.0067
	0.0126	0.0055	0.0039	0.0111	0.0111	0.0094	0.0066	0.0266	0.0061	0.0067
	0.0126	0.0053	0.0039	0.0111	0.0111	0.0094	0.0065	0.0266	0.0061	0.0067
	0.0126	0.0053	0.0038	0.0111	0.011	0.0092	0.0065	0.0265	0.0061	0.0067
	0.0125	0.0053	0.0038	0.011	0.0109	0.0092	0.0065	0.026	0.0061	0.0066
	0.0124	0.0052	0.0038	0.0109	0.0108	0.0091	0.0064	0.0256	0.006	0.0066
	0.0124	0.0052	0.0037	0.0109	0.0108	0.009	0.0063	0.0255	0.006	0.0065
	0.0124	0.0052	0.0037	0.0108	0.0107	0.0089	0.0063	0.0249	0.0059	0.0065
	0.0124	0.0052	0.0037	0.0107	0.0107	0.0088	0.0062	0.0248	0.0059	0.0065
	0.0121	0.0051	0.0037	0.0106	0.0106	0.0086	0.0062	0.0246	0.0059	0.0065
	0.0121	0.0051	0.0036	0.0105	0.0105	0.0085	0.0062	0.0246	0.0059	0.0065
	0.0121	0.005	0.0036	0.0104	0.0101	0.0085	0.0058	0.0245	0.0059	0.0065
	0.0121	0.005	0.0036	0.0104	0.0099	0.0084	0.0058	0.0244	0.0059	0.0063
	0.012	0.005	0.0035	0.0102	0.0099	0.0084	0.0057	0.0244	0.0057	0.0062
	0.012	0.0049	0.0035	0.0101	0.0097	0.0084	0.0057	0.0242	0.0057	0.0062
	0.012	0.0049	0.0035	0.0101	0.0097	0.0082	0.0056	0.024	0.0056	0.0062
	0.0118	0.0049	0.0035	0.0101	0.0097	0.0082	0.0056	0.0236	0.0055	0.0061
	0.0117	0.0048	0.0034	0.01	0.0097	0.0082	0.0055	0.0236	0.0055	0.0061
	0.0115	0.0048	0.0034	0.0099	0.0096	0.0081	0.0055	0.0235	0.0054	0.006
	0.0114	0.0048	0.0034	0.0099	0.0096	0.0081	0.0055	0.0234	0.0054	0.006
	0.0112	0.0048	0.0033	0.0098	0.0095	0.008	0.0055	0.0233	0.0054	0.006
	0.0111	0.0047	0.0033	0.0098	0.0093	0.008	0.0055	0.0231	0.0054	0.006
	0.011	0.0047	0.0032	0.0097	0.0093	0.0079	0.0054	0.023	0.0054	0.006
	0.011	0.0047	0.0032	0.0095	0.0093	0.0079	0.0054	0.0226	0.0053	0.0059
	0.011	0.0047	0.0032	0.0095	0.0093	0.0079	0.0053	0.0225	0.0053	0.0059
	0.0106	0.0047	0.0032	0.0094	0.0092	0.0078	0.0052	0.0223	0.0052	0.0059
	0.0106	0.0047	0.0031	0.0094	0.0092	0.0078	0.0051	0.0222	0.0052	0.0059
	0.0105	0.0046	0.0031	0.0093	0.0091	0.0076	0.0051	0.0219	0.0052	0.0058
	0.0104	0.0046	0.0031	0.0093	0.0091	0.0076	0.0051	0.0219	0.0051	0.0058
	0.0104	0.0046	0.0031	0.0092	0.0091	0.0075	0.0051	0.0218	0.0051	0.0058
	0.0102	0.0046	0.0031	0.0091	0.0091	0.0075	0.005	0.0216	0.0051	0.0058
	0.0102	0.0045	0.0031	0.0091	0.009	0.0075	0.0049	0.0214	0.005	0.0057
	0.0102	0.0045	0.003	0.0091	0.0089	0.0073	0.0048	0.0211	0.005	0.0057
	0.0101	0.0044	0.003	0.0089	0.0088	0.0072	0.0048	0.0209	0.0049	0.0057
	0.0101	0.0044	0.003	0.0088	0.0088	0.0072	0.0048	0.0208	0.0049	0.0057
	0.01	0.0043	0.003	0.0088	0.0088	0.0072	0.0047	0.0208	0.0049	0.0057
	0.01	0.0043	0.0029	0.0087	0.0088	0.0071	0.0047	0.0208	0.0049	0.0056
	0.0098	0.0043	0.0029	0.0087	0.0087	0.007	0.0047	0.0205	0.0049	0.0055
	0.0098	0.0043	0.0029	0.0085	0.0086	0.007	0.0047	0.0205	0.0047	0.0055
	0.0097	0.0043	0.0028	0.0085	0.0086	0.007	0.0044	0.0203	0.0046	0.0055
	0.0097	0.0043	0.0028	0.0085	0.0085	0.007	0.0043	0.0201	0.0046	0.0055
	0.0096	0.0043	0.0028	0.0085	0.0084	0.007	0.0043	0.0198	0.0046	0.0053
	0.0096	0.0042	0.0027	0.0085	0.0083	0.0069	0.0043	0.0197	0.0046	0.0053
	0.0095	0.0042	0.0027	0.0084	0.0082	0.0069	0.0043	0.0194	0.0046	0.0052
	0.0095	0.0042	0.0027	0.0084	0.0082	0.0069	0.0043	0.0193	0.0045	0.0052
	0.0095	0.0041	0.0027	0.0083	0.0081	0.0068	0.0042	0.0192	0.0044	0.0052
	0.0095	0.0041	0.0027	0.0083	0.0081	0.0067	0.0042	0.0192	0.0044	0.0051
	0.0094	0.0041	0.0027	0.0083	0.008	0.0066	0.0042	0.0191	0.0044	0.0051
	0.0094	0.0041	0.0026	0.0082	0.008	0.0066	0.0041	0.019	0.0044	0.005
	0.0094	0.0041	0.0026	0.0081	0.0079	0.0065	0.0041	0.0189	0.0044	0.005
	0.0094	0.004	0.0026	0.0081	0.0077	0.0064	0.004	0.0189	0.0044	0.005
	0.0093	0.004	0.0026	0.008	0.0077	0.0063	0.0039	0.0188	0.0043	0.005
	0.0093	0.0039	0.0025	0.008	0.0077	0.0063	0.0038	0.0188	0.0043	0.005
	0.0093	0.0039	0.0025	0.0079	0.0076	0.0063	0.0038	0.0187	0.0043	0.0049
	0.0093	0.0039	0.0025	0.0079	0.0076	0.0062	0.0038	0.0185	0.0042	0.0049
	0.0092	0.0039	0.0024	0.0079	0.0075	0.0062	0.0038	0.0183	0.0042	0.0049
	0.0092	0.0039	0.0024	0.0078	0.0074	0.0062	0.0038	0.0183	0.0042	0.0049
	0.0091	0.0039	0.0023	0.0077	0.0073	0.0061	0.0037	0.0182	0.0041	0.0048
	0.0091	0.0038	0.0023	0.0077	0.0073	0.0061	0.0037	0.0182	0.0041	0.0048
	0.0091	0.0038	0.0023	0.0077	0.0073	0.0061	0.0036	0.0178	0.0041	0.0048
	0.0091	0.0037	0.0022	0.0075	0.0072	0.0061	0.0036	0.0178	0.004	0.0047
	0.009	0.0037	0.0022	0.0075	0.0072	0.006	0.0036	0.0177	0.004	0.0047
	0.0089	0.0037	0.0022	0.0075	0.0072	0.006	0.0035	0.0175	0.004	0.0047
	0.0088	0.0037	0.0022	0.0075	0.0069	0.006	0.0035	0.0173	0.004	0.0047
	0.0087	0.0037	0.0022	0.0074	0.0069	0.006	0.0034	0.0173	0.004	0.0047
	0.0087	0.0037	0.0022	0.0074	0.0068	0.0059	0.0034	0.0173	0.004	0.0047
	0.0086	0.0036	0.0021	0.0074	0.0068	0.0059	0.0034	0.0172	0.004	0.0046
	0.0086	0.0036	0.0021	0.0073	0.0067	0.0059	0.0033	0.017	0.004	0.0046
	0.0086	0.0036	0.0021	0.0072	0.0066	0.0058	0.0033	0.0169	0.0039	0.0046
	0.0085	0.0036	0.0021	0.0072	0.0066	0.0057	0.0033	0.0168	0.0039	0.0046
	0.0084	0.0036	0.0021	0.0071	0.0065	0.0056	0.0033	0.0167	0.0038	0.0045
	0.0084	0.0036	0.0019	0.0069	0.0065	0.0056	0.0032	0.0166	0.0038	0.0045
	0.0084	0.0036	0.0019	0.0069	0.0065	0.0056	0.0032	0.0165	0.0038	0.0044
	0.0083	0.0035	0.0019	0.0069	0.0065	0.0055	0.0032	0.0165	0.0038	0.0044
	0.0083	0.0035	0.0019	0.0069	0.0063	0.0055	0.0032	0.0162	0.0038	0.0044
	0.0082	0.0034	0.0018	0.0069	0.0063	0.0055	0.0031	0.0162	0.0037	0.0043
	0.0081	0.0034	0.0018	0.0069	0.0062	0.0055	0.0031	0.016	0.0037	0.0042
	0.0081	0.0034	0.0018	0.0068	0.0062	0.0054	0.0031	0.0159	0.0037	0.0042
	0.008	0.0033	0.0018	0.0068	0.0062	0.0054	0.0031	0.0155	0.0037	0.0042
	0.008	0.0033	0.0018	0.0068	0.0062	0.0053	0.0031	0.0155	0.0037	0.0042
	0.0079	0.0033	0.0018	0.0067	0.0061	0.0053	0.0031	0.0155	0.0037	0.0042
	0.0078	0.0033	0.0018	0.0067	0.0061	0.0052	0.003	0.0155	0.0037	0.0041
	0.0078	0.0033	0.0018	0.0067	0.0061	0.0052	0.003	0.0151	0.0036	0.0041
	0.0077	0.0032	0.0018	0.0067	0.0061	0.0052	0.003	0.015	0.0036	0.0041
	0.0076	0.0032	0.0017	0.0066	0.0059	0.0051	0.003	0.015	0.0036	0.0041
	0.0075	0.0032	0.0017	0.0065	0.0059	0.0051	0.0029	0.015	0.0036	0.0041
	0.0075	0.0032	0.0017	0.0064	0.0058	0.0051	0.0028	0.0149	0.0035	0.0041
	0.0073	0.0032	0.0017	0.0064	0.0058	0.005	0.0028	0.0148	0.0035	0.0041
	0.0073	0.0032	0.0017	0.0064	0.0058	0.005	0.0028	0.0148	0.0035	0.004
	0.0073	0.0031	0.0016	0.0064	0.0058	0.005	0.0027	0.0147	0.0035	0.004
	0.0073	0.0031	0.0016	0.0064	0.0057	0.0048	0.0027	0.0146	0.0034	0.004
	0.0072	0.0031	0.0016	0.0064	0.0057	0.0048	0.0026	0.0145	0.0034	0.0039
	0.0072	0.0031	0.0016	0.0063	0.0057	0.0048	0.0026	0.0144	0.0033	0.0039
	0.0071	0.0031	0.0015	0.0063	0.0056	0.0047	0.0026	0.0144	0.0032	0.0039
	0.007	0.003	0.0015	0.0063	0.0056	0.0047	0.0026	0.0144	0.0032	0.0039
	0.007	0.003	0.0015	0.0063	0.0056	0.0047	0.0026	0.0143	0.0031	0.0038
	0.0068	0.003	0.0015	0.0062	0.0056	0.0046	0.0026	0.0141	0.0031	0.0038
	0.0068	0.003	0.0015	0.006	0.0055	0.0046	0.0026	0.014	0.0031	0.0038
	0.0067	0.003	0.0015	0.0059	0.0055	0.0046	0.0026	0.014	0.003	0.0038
	0.0067	0.0029	0.0014	0.0059	0.0055	0.0046	0.0026	0.0139	0.003	0.0038
	0.0067	0.0029	0.0014	0.0059	0.0055	0.0046	0.0025	0.0138	0.003	0.0038
	0.0066	0.0029	0.0014	0.0058	0.0055	0.0045	0.0025	0.0138	0.003	0.0038
	0.0066	0.0029	0.0014	0.0058	0.0055	0.0045	0.0025	0.0138	0.003	0.0037
	0.0066	0.0028	0.0014	0.0058	0.0054	0.0044	0.0025	0.0136	0.003	0.0037
	0.0066	0.0028	0.0013	0.0057	0.0054	0.0044	0.0025	0.0135	0.0029	0.0037
	0.0066	0.0028	0.0013	0.0056	0.0054	0.0044	0.0025	0.0133	0.0029	0.0037
	0.0065	0.0028	0.0013	0.0056	0.0053	0.0044	0.0025	0.0133	0.0029	0.0037
	0.0065	0.0028	0.0013	0.0056	0.0053	0.0044	0.0025	0.0133	0.0029	0.0037
	0.0065	0.0028	0.0013	0.0056	0.0053	0.0043	0.0025	0.0133	0.0029	0.0036
	0.0065	0.0028	0.0013	0.0056	0.0053	0.0043	0.0025	0.0133	0.0029	0.0036
	0.0065	0.0028	0.0013	0.0056	0.0052	0.0043	0.0025	0.0133	0.0029	0.0036
	0.0064	0.0027	0.0012	0.0056	0.0052	0.0042	0.0024	0.0132	0.0028	0.0035
	0.0064	0.0027	0.0012	0.0055	0.0052	0.0042	0.0024	0.013	0.0028	0.0035
	0.0063	0.0027	0.0012	0.0055	0.0052	0.0042	0.0024	0.013	0.0028	0.0035
	0.0062	0.0026	0.0012	0.0055	0.0052	0.0042	0.0024	0.013	0.0028	0.0035
	0.0062	0.0026	0.0012	0.0055	0.0052	0.0042	0.0024	0.0129	0.0027	0.0034
	0.0062	0.0026	0.0012	0.0054	0.0051	0.0042	0.0024	0.0126	0.0027	0.0033
	0.0062	0.0026	0.0012	0.0054	0.0051	0.0042	0.0024	0.0125	0.0027	0.0033
	0.0061	0.0026	0.0012	0.0054	0.005	0.0042	0.0023	0.0125	0.0027	0.0033
	0.0061	0.0026	0.0011	0.0054	0.005	0.0042	0.0023	0.0125	0.0027	0.0033
	0.0061	0.0026	0.0011	0.0053	0.005	0.0041	0.0023	0.0124	0.0027	0.0033
	0.0061	0.0026	0.0011	0.0053	0.005	0.0041	0.0023	0.0124	0.0026	0.0032
	0.0061	0.0026	0.001	0.0053	0.005	0.0041	0.0023	0.0124	0.0026	0.0032
	0.006	0.0026	0.001	0.0053	0.005	0.0041	0.0022	0.0123	0.0026	0.0032
	0.0059	0.0025	0.001	0.0053	0.005	0.0041	0.0022	0.0122	0.0026	0.0031
	0.0059	0.0025	0.001	0.0053	0.005	0.0041	0.0022	0.0121	0.0026	0.0031
	0.0058	0.0025	0.001	0.0052	0.0049	0.004	0.0022	0.0119	0.0026	0.0031
	0.0058	0.0024	0.0009	0.0051	0.0047	0.0039	0.0021	0.0118	0.0025	0.003
	0.0058	0.0024	0.0009	0.005	0.0046	0.0039	0.0021	0.0118	0.0025	0.003
	0.0058	0.0024	0.0007	0.005	0.0046	0.0039	0.0021	0.0117	0.0025	0.003
	0.0057	0.0024	0.0007	0.005	0.0046	0.0039	0.002	0.0115	0.0025	0.003
	0.0057	0.0024	0.0007	0.005	0.0046	0.0039	0.002	0.0114	0.0025	0.003
	0.0057	0.0024	0.0005	0.0049	0.0045	0.0038	0.002	0.0113	0.0025	0.003
	0.0057	0.0023	0.0005	0.0049	0.0045	0.0038	0.002	0.0112	0.0025	0.003
	0.0057	0.0023	0.0005	0.0049	0.0045	0.0037	0.002	0.0111	0.0024	0.003
	0.0056	0.0023	0.0005	0.0049	0.0045	0.0037	0.002	0.0111	0.0024	0.0029
	0.0056	0.0022	0.0004	0.0048	0.0045	0.0036	0.0019	0.0109	0.0024	0.0029
	0.0056	0.0022	0.0004	0.0048	0.0045	0.0036	0.0019	0.0109	0.0023	0.0029
	0.0056	0.0022	0.0004	0.0048	0.0045	0.0036	0.0019	0.0108	0.0023	0.0029
	0.0056	0.0022	0.0003	0.0047	0.0045	0.0036	0.0019	0.0108	0.0023	0.0029
	0.0056	0.0022	0.0002	0.0047	0.0045	0.0036	0.0019	0.0108	0.0022	0.0028
	0.0055	0.0021		0.0047	0.0044	0.0036	0.0019	0.0107	0.0022	0.0028
	0.0055	0.0021		0.0047	0.0044	0.0036	0.0018	0.0107	0.0022	0.0028
	0.0055	0.0021		0.0046	0.0044	0.0036	0.0018	0.0106	0.0021	0.0027
	0.0053	0.0021		0.0046	0.0043	0.0035	0.0018	0.0106	0.0021	0.0027
	0.0053	0.002		0.0046	0.0043	0.0035	0.0018	0.0106	0.0021	0.0027
	0.0053	0.002		0.0046	0.0042	0.0035	0.0017	0.0106	0.0021	0.0027
	0.0052	0.002		0.0046	0.0042	0.0035	0.0017	0.0104	0.0021	0.0027
	0.0052	0.002		0.0046	0.0042	0.0035	0.0017	0.0104	0.0021	0.0027
	0.0052	0.002		0.0045	0.0042	0.0034	0.0017	0.0104	0.0021	0.0026
	0.0052	0.002		0.0045	0.0042	0.0034	0.0017	0.0104	0.0021	0.0026
	0.0051	0.002		0.0045	0.0042	0.0034	0.0017	0.0102	0.002	0.0026
	0.005	0.002		0.0044	0.0041	0.0034	0.0017	0.0102	0.002	0.0026
	0.005	0.0019		0.0044	0.0041	0.0034	0.0017	0.0102	0.002	0.0026
	0.0049	0.0019		0.0044	0.0041	0.0033	0.0017	0.0101	0.002	0.0025
	0.0049	0.0019		0.0044	0.004	0.0033	0.0016	0.01	0.002	0.0025
	0.0049	0.0019		0.0044	0.004	0.0033	0.0016	0.0099	0.002	0.0025
	0.0048	0.0019		0.0044	0.004	0.0033	0.0016	0.0099	0.0019	0.0025
	0.0048	0.0019		0.0043	0.004	0.0033	0.0016	0.0099	0.0019	0.0025
	0.0048	0.0018		0.0043	0.0039	0.0033	0.0016	0.0098	0.0019	0.0024
	0.0048	0.0018		0.0043	0.0039	0.0033	0.0015	0.0096	0.0019	0.0024
	0.0048	0.0018		0.0043	0.0039	0.0033	0.0015	0.0096	0.0019	0.0024
	0.0048	0.0017		0.0042	0.0039	0.0032	0.0015	0.0096	0.0019	0.0024
	0.0048	0.0017		0.0042	0.0039	0.0032	0.0014	0.0095	0.0019	0.0023
	0.0047	0.0017		0.0041	0.0038	0.0032	0.0014	0.0095	0.0019	0.0023
	0.0047	0.0016		0.0041	0.0036	0.0032	0.0014	0.0094	0.0019	0.0023
	0.0047	0.0016		0.0041	0.0036	0.0032	0.0014	0.0094	0.0019	0.0022
	0.0046	0.0016		0.0041	0.0036	0.0031	0.0014	0.0094	0.0019	0.0022
	0.0046	0.0015		0.0041	0.0036	0.0031	0.0013	0.0093	0.0019	0.0022
	0.0046	0.0015		0.0041	0.0036	0.0031	0.0013	0.0092	0.0018	0.0021
	0.0046	0.0015		0.004	0.0036	0.0031	0.0013	0.0092	0.0018	0.0021
	0.0046	0.0015		0.004	0.0036	0.0031	0.0013	0.0092	0.0018	0.0021
	0.0045	0.0015		0.0039	0.0036	0.003	0.0013	0.0091	0.0018	0.0021
	0.0045	0.0014		0.0039	0.0035	0.003	0.0012	0.0091	0.0017	0.002
	0.0045	0.0014		0.0038	0.0035	0.003	0.0012	0.0091	0.0017	0.002
	0.0045	0.0014		0.0038	0.0035	0.003	0.0012	0.009	0.0017	0.002
	0.0044	0.0014		0.0038	0.0035	0.0029	0.0012	0.0088	0.0016	0.002
	0.0043	0.0014		0.0038	0.0034	0.0029	0.0012	0.0088	0.0016	0.0019
	0.0043	0.0014		0.0037	0.0034	0.0029	0.0012	0.0088	0.0016	0.0019
	0.0043	0.0013		0.0037	0.0034	0.0029	0.0011	0.0087	0.0016	0.0019
	0.0043	0.0013		0.0037	0.0034	0.0029	0.0011	0.0086	0.0016	0.0019
	0.0043	0.0013		0.0037	0.0034	0.0029	0.0011	0.0086	0.0016	0.0018
	0.0043	0.0013		0.0037	0.0034	0.0028	0.0011	0.0086	0.0016	0.0018
	0.0042	0.0013		0.0037	0.0034	0.0028	0.0011	0.0086	0.0016	0.0018
	0.0042	0.0013		0.0037	0.0034	0.0028	0.0011	0.0085	0.0016	0.0018
	0.0042	0.0013		0.0037	0.0033	0.0028	0.001	0.0084	0.0015	0.0018
	0.0042	0.0013		0.0037	0.0033	0.0028	0.001	0.0084	0.0015	0.0018
	0.0042	0.0013		0.0036	0.0033	0.0028	0.001	0.0084	0.0015	0.0017
	0.0041	0.0012		0.0036	0.0033	0.0028	0.001	0.0083	0.0015	0.0017
	0.0041	0.0012		0.0036	0.0032	0.0027	0.001	0.0083	0.0015	0.0017
	0.0041	0.0012		0.0035	0.0032	0.0027	0.0009	0.0082	0.0015	0.0016
	0.0041	0.0012		0.0035	0.0032	0.0027	0.0009	0.0082	0.0014	0.0015
	0.0041	0.0012		0.0035	0.0032	0.0027	0.0009	0.0082	0.0014	0.0015
	0.0041	0.0012		0.0035	0.0032	0.0027	0.0009	0.0081	0.0014	0.0015
	0.0041	0.0011		0.0034	0.0031	0.0026	0.0009	0.0081	0.0014	0.0015
	0.0041	0.0011		0.0034	0.0031	0.0026	0.0008	0.008	0.0014	0.0014
	0.004	0.0011		0.0033	0.0031	0.0026	0.0008	0.008	0.0014	0.0014
	0.004	0.0011		0.0033	0.0031	0.0026	0.0008	0.008	0.0014	0.0014
	0.004	0.0011		0.0033	0.0031	0.0026	0.0008	0.008	0.0013	0.0013
	0.004	0.0011		0.0033	0.0031	0.0025	0.0008	0.008	0.0013	0.0013
	0.004	0.0011		0.0033	0.003	0.0025	0.0008	0.0079	0.0013	0.0013
	0.004	0.001		0.0033	0.003	0.0025	0.0008	0.0079	0.0013	0.0013
	0.0039	0.001		0.0033	0.003	0.0025	0.0007	0.0079	0.0012	0.0013
	0.0039	0.001		0.0032	0.0029	0.0025	0.0007	0.0077	0.0012	0.0013
	0.0039	0.001		0.0032	0.0029	0.0025	0.0006	0.0077	0.0012	0.0012
	0.0038	0.001		0.0032	0.0029	0.0025	0.0005	0.0077	0.0012	0.0012
	0.0038	0.001		0.0032	0.0029	0.0024	0.0005	0.0077	0.0011	0.0012
	0.0038	0.0009		0.0032	0.0029	0.0024	0.0005	0.0077	0.0011	0.0012
	0.0038	0.0009		0.0031	0.0028	0.0024	0.0005	0.0077	0.0011	0.0012
	0.0038	0.0009		0.0031	0.0028	0.0023	0.0005	0.0076	0.0011	0.0012
	0.0038	0.0009		0.0031	0.0028	0.0023	0.0005	0.0075	0.0011	0.0012
	0.0038	0.0009		0.0031	0.0028	0.0023	0.0004	0.0075	0.0011	0.0011
	0.0038	0.0009		0.0031	0.0027	0.0023	0.0002	0.0075	0.001	0.0011
	0.0038	0.0009		0.0031	0.0027	0.0022	0.0002	0.0073	0.001	0.0011
	0.0037	0.0009		0.003	0.0027	0.0022	0.0002	0.0072	0.001	0.0011
	0.0037	0.0009		0.003	0.0027	0.0022		0.0072	0.001	0.0011
	0.0037	0.0009		0.003	0.0027	0.0022		0.0072	0.001	0.0011
	0.0037	0.0009		0.003	0.0026	0.0022		0.0072	0.0009	0.0011
	0.0037	0.0009		0.003	0.0026	0.0022		0.0072	0.0009	0.001
	0.0036	0.0009		0.003	0.0026	0.0021		0.0071	0.0009	0.001
	0.0036	0.0009		0.0029	0.0026	0.0021		0.0071	0.0009	0.001
	0.0036	0.0008		0.0029	0.0026	0.0021		0.007	0.0009	0.001
	0.0036	0.0008		0.0029	0.0026	0.0021		0.007	0.0009	0.0009
	0.0036	0.0007		0.0029	0.0025	0.0021		0.0069	0.0008	0.0009
	0.0036	0.0007		0.0029	0.0025	0.0021		0.0069	0.0008	0.0009
	0.0035	0.0007		0.0029	0.0025	0.0021		0.0068	0.0008	0.0009
	0.0035	0.0007		0.0028	0.0025	0.0021		0.0067	0.0008	0.0009
	0.0034	0.0007		0.0028	0.0025	0.0021		0.0067	0.0008	0.0008
	0.0034	0.0007		0.0028	0.0025	0.0021		0.0067	0.0008	0.0008
	0.0034	0.0007		0.0028	0.0024	0.0021		0.0066	0.0008	0.0008
	0.0034	0.0006		0.0028	0.0024	0.002		0.0066	0.0007	0.0008
	0.0034	0.0006		0.0028	0.0024	0.002		0.0066	0.0007	0.0008
	0.0034	0.0006		0.0028	0.0024	0.002		0.0066	0.0007	0.0008
	0.0033	0.0005		0.0027	0.0024	0.002		0.0065	0.0007	0.0008
	0.0033	0.0005		0.0027	0.0023	0.002		0.0065	0.0006	0.0008
	0.0033	0.0005		0.0027	0.0023	0.002		0.0064	0.0006	0.0008
	0.0032	0.0005		0.0027	0.0023	0.002		0.0064	0.0006	0.0008
	0.0032	0.0005		0.0027	0.0023	0.0019		0.0064	0.0006	0.0007
	0.0032	0.0003		0.0027	0.0022	0.0019		0.0064	0.0006	0.0007
	0.0032	0.0003		0.0027	0.0022	0.0019		0.0063	0.0006	0.0007
	0.0032	0.0003		0.0027	0.0022	0.0019		0.0063	0.0005	0.0006
	0.0032	0.0002		0.0027	0.0021	0.0019		0.0062	0.0005	0.0006
	0.0031			0.0027	0.0021	0.0018		0.0062	0.0005	0.0006
	0.0031			0.0027	0.0021	0.0018		0.0062	0.0004	0.0006
	0.003			0.0026	0.0021	0.0018		0.0062	0.0003	0.0005
	0.003			0.0026	0.0021	0.0018		0.0062	0.0003	0.0005
	0.003			0.0026	0.0021	0.0018		0.0061	0.0003	0.0005
	0.003			0.0026	0.0021	0.0018		0.0061	0.0003	0.0005
	0.003			0.0025	0.002	0.0017		0.0061	0.0003	0.0005
	0.0029			0.0025	0.002	0.0017		0.0061	0.0003	0.0005
	0.0029			0.0025	0.002	0.0017		0.006	0.0003	0.0005
	0.0029			0.0025	0.002	0.0017		0.006	0.0003	0.0005
	0.0029			0.0025	0.002	0.0017		0.006	0.0002	0.0005
	0.0029			0.0025	0.002	0.0017		0.0059	0.0002	0.0005
	0.0028			0.0025	0.0019	0.0017		0.0059	0.0002	0.0005
	0.0028			0.0024	0.0019	0.0016		0.0059		0.0005
	0.0028			0.0024	0.0019	0.0016		0.0059		0.0005
	0.0028			0.0024	0.0019	0.0016		0.0059		0.0004
	0.0028			0.0024	0.0019	0.0016		0.0058		0.0004
	0.0027			0.0024	0.0018	0.0016		0.0058		0.0004
	0.0027			0.0024	0.0018	0.0015		0.0058		0.0004
	0.0027			0.0024	0.0018	0.0015		0.0058		0.0004
	0.0027			0.0024	0.0018	0.0015		0.0058		0.0004
	0.0027			0.0023	0.0018	0.0015		0.0057		0.0003
	0.0027			0.0023	0.0017	0.0015		0.0057		0.0003
	0.0027			0.0023	0.0017	0.0015		0.0057		0.0003
	0.0027			0.0023	0.0017	0.0014		0.0057		0.0003
	0.0026			0.0023	0.0017	0.0014		0.0057		0.0003
	0.0026			0.0022	0.0017	0.0014		0.0056		0.0003
	0.0026			0.0022	0.0016	0.0014		0.0056		0.0002
	0.0026			0.0022	0.0016	0.0014		0.0056		0.0002
	0.0025			0.0022	0.0016	0.0014		0.0054		0.0002
	0.0025			0.0022	0.0016	0.0013		0.0054		0.0002
	0.0025			0.0022	0.0016	0.0013		0.0054		0.0002
	0.0025			0.0022	0.0016	0.0013		0.0053		0.0002
	0.0025			0.0022	0.0016	0.0013		0.0053		0.0002
	0.0024			0.0022	0.0016	0.0013		0.0053		0.0002
	0.0024			0.0022	0.0015	0.0013		0.0053		0.0002
	0.0024			0.0022	0.0014	0.0013		0.0053		0.0002
	0.0024			0.0021	0.0014	0.0013		0.0053
	0.0024			0.0021	0.0014	0.0013		0.0052
	0.0024			0.0021	0.0013	0.0013		0.0052
	0.0023			0.0021	0.0013	0.0013		0.0052
	0.0023			0.0021	0.0013	0.0013		0.0051
	0.0023			0.0021	0.0013	0.0012		0.0051
	0.0023			0.0021	0.0012	0.0012		0.005
	0.0023			0.0021	0.0012	0.0012		0.005
	0.0023			0.002	0.0012	0.0012		0.005
	0.0023			0.002	0.0012	0.0012		0.0048
	0.0023			0.002	0.0012	0.0012		0.0048
	0.0022			0.002	0.0012	0.0012		0.0048
	0.0022			0.002	0.0012	0.0012		0.0048
	0.0022			0.002	0.0012	0.0012		0.0048
	0.0022			0.002	0.0012	0.0012		0.0048
	0.0022			0.002	0.0012	0.0011		0.0048
	0.0022			0.002	0.0011	0.0011		0.0048
	0.0022			0.0019	0.0011	0.0011		0.0047
	0.0021			0.0019	0.0011	0.0011		0.0047
	0.0021			0.0019	0.0011	0.0011		0.0047
	0.0021			0.0019	0.0011	0.001		0.0046
	0.0021			0.0019	0.0011	0.001		0.0046
	0.0021			0.0019	0.001	0.001		0.0046
	0.002			0.0019	0.001	0.001		0.0045
	0.002			0.0019	0.001	0.001		0.0045
	0.002			0.0018	0.0009	0.0009		0.0045
	0.002			0.0018	0.0009	0.0009		0.0045
	0.002			0.0018	0.0009	0.0009		0.0045
	0.002			0.0018	0.0008	0.0009		0.0045
	0.002			0.0018	0.0008	0.0009		0.0045
	0.002			0.0018	0.0007	0.0009		0.0044
	0.002			0.0017	0.0007	0.0008		0.0044
	0.002			0.0017	0.0007	0.0008		0.0044
	0.002			0.0017	0.0006	0.0008		0.0043
	0.0019			0.0017	0.0005	0.0008		0.0043
	0.0019			0.0016	0.0005	0.0008		0.0043
	0.0019			0.0016	0.0005	0.0007		0.0043
	0.0019			0.0016	0.0005	0.0007		0.0043
	0.0019			0.0016	0.0005	0.0007		0.0042
	0.0019			0.0016	0.0004	0.0006		0.0042
	0.0019			0.0016	0.0004	0.0006		0.0042
	0.0018			0.0016	0.0004	0.0005		0.0042
	0.0018			0.0016	0.0003	0.0005		0.0042
	0.0018			0.0016	0.0002	0.0005		0.0042
	0.0018			0.0016	0.0002	0.0004		0.0041
	0.0018			0.0015		0.0004		0.0041
	0.0018			0.0015		0.0004		0.0041
	0.0018			0.0015		0.0003		0.0041
	0.0018			0.0015		0.0003		0.0041
	0.0018			0.0015		0.0002		0.004
	0.0018			0.0015		0.0002		0.004
	0.0018			0.0015		0.0002		0.004
	0.0018			0.0015		0.0002		0.004
	0.0018			0.0015		0.0002		0.0039
	0.0017			0.0015				0.0039
	0.0017			0.0014				0.0038
	0.0017			0.0014				0.0038
	0.0017			0.0014				0.0038
	0.0017			0.0014				0.0037
	0.0017			0.0014				0.0037
	0.0017			0.0014				0.0037
	0.0016			0.0013				0.0037
	0.0016			0.0013				0.0037
	0.0016			0.0013				0.0037
	0.0016			0.0013				0.0037
	0.0016			0.0013				0.0036
	0.0016			0.0013				0.0036
	0.0016			0.0013				0.0036
	0.0016			0.0013				0.0036
	0.0016			0.0013				0.0036
	0.0016			0.0012				0.0035
	0.0015			0.0012				0.0035
	0.0015			0.0012				0.0035
	0.0015			0.0012				0.0035
	0.0015			0.0012				0.0035
	0.0015			0.0011				0.0034
	0.0015			0.0011				0.0034
	0.0015			0.0011				0.0034
	0.0014			0.001				0.0034
	0.0014			0.001				0.0034
	0.0014			0.001				0.0034
	0.0014			0.001				0.0034
	0.0014			0.001				0.0034
	0.0014			0.001				0.0033
	0.0013			0.001				0.0032
	0.0013			0.001				0.0032
	0.0013			0.001				0.0032
	0.0013			0.0009				0.0032
	0.0013			0.0009				0.0032
	0.0013			0.0009				0.0031
	0.0013			0.0009				0.0031
	0.0013			0.0009				0.0031
	0.0012			0.0009				0.0031
	0.0012			0.0008				0.003
	0.0012			0.0008				0.003
	0.0012			0.0008				0.003
	0.0012			0.0008				0.003
	0.0012			0.0008				0.003
	0.0012			0.0008				0.003
	0.0011			0.0008				0.003
	0.0011			0.0008				0.003
	0.0011			0.0007				0.003
	0.0011			0.0007				0.003
	0.0011			0.0007				0.0029
	0.001			0.0007				0.0029
	0.001			0.0006				0.0029
	0.001			0.0006				0.0029
	0.001			0.0006				0.0029
	0.001			0.0006				0.0029
	0.0009			0.0006				0.0029
	0.0009			0.0005				0.0029
	0.0008			0.0005				0.0029
	0.0008			0.0004				0.0028
	0.0007			0.0004				0.0028
	0.0007			0.0004				0.0028
	0.0007			0.0004				0.0028
	0.0007			0.0004				0.0028
	0.0006			0.0004				0.0028
	0.0006			0.0003				0.0028
	0.0006			0.0003				0.0028
	0.0006			0.0002				0.0028
	0.0006			0.0002				0.0028
	0.0005			0.0002				0.0028
	0.0005			0.0002				0.0027
	0.0005							0.0027
	0.0004							0.0027
	0.0004							0.0027
	0.0004							0.0026
	0.0004							0.0026
	0.0004							0.0026
	0.0003							0.0026
	0.0003							0.0026
	0.0003							0.0026
	0.0003							0.0025
	0.0003							0.0025
	0.0003							0.0025
	0.0003							0.0025
	0.0002							0.0025
	0.0002							0.0025
	0.0002							0.0025
	0.0002							0.0025
	0.0002							0.0024
								0.0024
								0.0024
								0.0024
								0.0023
								0.0023
								0.0023
								0.0023
								0.0023
								0.0023
								0.0023
								0.0022
								0.0022
								0.0022
								0.0022
								0.0022
								0.0022
								0.0022
								0.0022
								0.0021
								0.0021
								0.0021
								0.0021
								0.0021
								0.0021
								0.002
								0.002
								0.002
								0.002
								0.002
								0.0019
								0.0019
								0.0019
								0.0019
								0.0019
								0.0019
								0.0018
								0.0018
								0.0018
								0.0018
								0.0018
								0.0018
								0.0018
								0.0017
								0.0017
								0.0017
								0.0017
								0.0017
								0.0017
								0.0017
								0.0017
								0.0017
								0.0017
								0.0016
								0.0016
								0.0016
								0.0016
								0.0016
								0.0016
								0.0016
								0.0016
								0.0015
								0.0015
								0.0015
								0.0015
								0.0015
								0.0015
								0.0015
								0.0014
								0.0014
								0.0014
								0.0014
								0.0014
								0.0013
								0.0013
								0.0013
								0.0013
								0.0013
								0.0013
								0.0012
								0.0012
								0.0012
								0.0011
								0.0011
								0.0011
								0.0011
								0.0011
								0.0011
								0.0011
								0.0011
								0.001
								0.001
								0.001
								0.0009
								0.0009
								0.0009
								0.0009
								0.0009
								0.0009
								0.0008
								0.0008
								0.0008
								0.0008
								0.0008
								0.0008
								0.0008
								0.0008
								0.0007
								0.0007
								0.0007
								0.0007
								0.0007
								0.0006
								0.0006
								0.0006
								0.0006
								0.0005
								0.0005
								0.0005
								0.0005
								0.0004
								0.0004
								0.0004
								0.0004
								0.0004
								0.0003
								0.0003
								0.0003
								0.0003
								0.0003
								0.0003
								0.0003
								0.0003
								0.0003
								0.0003
								0.0002
								0.0002
								0.0002
								0.0002
