# Supplementary material for: Bilateral regulation of EGFR activity and local PI(4,5)P2 dynamics in mammalian cells observed with superresolution microscopy
Source: eLife journal article supplement (doi:10.7554/elife.101652), 2024-10-09
Supplement: fig1-data2 [file Figure 1C.xlsx]

## Sheet: EGFR_before
	cell#1	cell#2	cell#3	cell#4	cell#5	cell#6	cell#7	cell#8	cell#9
0.01	0.00308939	0.00401202	0.00578597	0.00374657	0.0104093	0.00505246	0.0049681	0.00458735	0.00478143
0.02	0.0061441	0.00787534	0.0113571	0.0075138	0.020579	0.010077	0.00968384	0.0089183	0.00945762
0.03	0.00906527	0.0115592	0.0165511	0.011012	0.029033	0.0145779	0.0140738	0.0130617	0.0138337
0.04	0.0118672	0.0149998	0.0216525	0.0142429	0.0361124	0.0186587	0.0180229	0.0168466	0.0177667
0.05	0.0145465	0.0180787	0.0263869	0.0172702	0.0419997	0.0220967	0.0216066	0.0203754	0.0212842
0.06	0.0170905	0.020808	0.0306504	0.0201777	0.0467272	0.0252958	0.0247695	0.0234849	0.0243006
0.07	0.0195466	0.0234159	0.034758	0.0228641	0.0507525	0.0282041	0.0278059	0.0263842	0.0271103
0.08	0.0219373	0.0260008	0.038675	0.025617	0.0543648	0.03106	0.0306611	0.0291801	0.0298491
0.09	0.0241059	0.0282319	0.0421888	0.0279535	0.0571006	0.0333999	0.0330874	0.031642	0.0321448
0.1	0.0260823	0.0301497	0.0453004	0.0300641	0.0590734	0.0354014	0.0352004	0.0337178	0.0341117
0.11	0.027827	0.0317839	0.0480497	0.031907	0.0604921	0.0371157	0.0369917	0.0355316	0.0357386
0.12	0.0293923	0.0331467	0.0505044	0.0335403	0.0615503	0.0385366	0.0384884	0.037139	0.0370834
0.13	0.0307907	0.0342658	0.0526501	0.0349628	0.062223	0.0397215	0.0396872	0.0384913	0.0381846
0.14	0.0319905	0.0351961	0.0545226	0.0361793	0.0625186	0.0407288	0.040738	0.0396214	0.0390573
0.15	0.0330158	0.0359855	0.0561121	0.0372	0.0626483	0.0415352	0.0415735	0.0406087	0.0397716
0.16	0.0338882	0.0365754	0.0574405	0.038061	0.0624823	0.0421426	0.0422283	0.0413662	0.0403295
0.17	0.0346137	0.0370212	0.0585895	0.0388017	0.062183	0.042539	0.04268	0.0419379	0.0407268
0.18	0.0351929	0.0372941	0.0595645	0.0393675	0.0616916	0.042809	0.0429821	0.0423368	0.0409866
0.19	0.0356131	0.0375585	0.0602535	0.0398571	0.0611089	0.0429135	0.0431234	0.0425804	0.0410964
0.2	0.0359307	0.0376424	0.0607379	0.0401619	0.0603917	0.0429726	0.0431475	0.0427465	0.0410819
0.21	0.0361253	0.0376447	0.0610805	0.0404447	0.0596672	0.0428707	0.0430464	0.0427762	0.040958
0.22	0.0362019	0.0375532	0.0612118	0.0405604	0.0588806	0.0426983	0.0428425	0.0426725	0.0407641
0.23	0.0361562	0.037359	0.0612349	0.0405986	0.0579911	0.042442	0.0425327	0.0424959	0.040474
0.24	0.0360192	0.0371122	0.0610494	0.0405471	0.0571344	0.0420988	0.042129	0.0422229	0.04009
0.25	0.035786	0.0368084	0.0607388	0.040386	0.0561757	0.0417147	0.0416463	0.0418647	0.0396506
0.26	0.0354739	0.0364806	0.0603638	0.0401617	0.0552199	0.0412961	0.0411017	0.0414227	0.0391377
0.27	0.0350854	0.0360482	0.0599136	0.0398653	0.0542652	0.0408426	0.0405171	0.0409102	0.0385386
0.28	0.0346486	0.0355819	0.059378	0.0394861	0.0532285	0.0402971	0.0398813	0.0403517	0.037923
0.29	0.0341322	0.0350598	0.0587499	0.0390521	0.0521897	0.0397263	0.0392074	0.0397224	0.037261
0.3	0.0335574	0.034527	0.0580058	0.0385381	0.0511137	0.0391179	0.038482	0.0390678	0.0365498
0.31	0.0329336	0.0339779	0.0572151	0.0379773	0.0500182	0.0385134	0.0377189	0.0383734	0.0358515
0.32	0.0322728	0.033407	0.0563533	0.0373949	0.0489518	0.0378735	0.0369423	0.0376648	0.0350975
0.33	0.0315838	0.0327808	0.0554201	0.0367673	0.0478789	0.0372196	0.0361889	0.0369523	0.0343523
0.34	0.0308591	0.0321686	0.0544366	0.0361332	0.0468675	0.036572	0.0353596	0.0361989	0.0335086
0.35	0.030105	0.0314581	0.0534773	0.0354636	0.0457942	0.0358851	0.0345641	0.0354492	0.032686
0.36	0.0293468	0.0308144	0.0524386	0.0347564	0.0447681	0.035187	0.0337709	0.0346831	0.0318758
0.37	0.0285749	0.030133	0.0513715	0.0340277	0.0437543	0.0345011	0.0329825	0.0339116	0.0311027
0.38	0.0277824	0.0294592	0.0503102	0.0333095	0.0426986	0.0337769	0.0321768	0.0331522	0.0302952
0.39	0.0269802	0.0287581	0.0491994	0.0325647	0.0416727	0.0331005	0.0313627	0.0324003	0.0294979
0.4	0.0261904	0.0280407	0.0481141	0.0318525	0.0406865	0.0323894	0.0305976	0.03165	0.0287313
0.41	0.0254042	0.027366	0.047005	0.031104	0.0397146	0.031705	0.0298427	0.0309227	0.0279233
0.42	0.024628	0.0266768	0.0458868	0.0303915	0.0386968	0.0310581	0.0290865	0.0302112	0.0271233
0.43	0.023864	0.0260407	0.044795	0.0297049	0.0377039	0.0303927	0.0283523	0.0295271	0.026365
0.44	0.0231196	0.0253895	0.0436699	0.0289873	0.0367675	0.0297481	0.0276643	0.0288738	0.0256549
0.45	0.0223792	0.0247508	0.042532	0.0282672	0.0358882	0.0291099	0.0269619	0.0282215	0.0249469
0.46	0.0216522	0.0241189	0.0414486	0.0275637	0.0350042	0.0285149	0.026286	0.027591	0.0242487
0.47	0.0209512	0.0234902	0.0404032	0.0268795	0.0341609	0.0279078	0.0256554	0.026988	0.0235926
0.48	0.0202728	0.0228807	0.0393197	0.0262109	0.0333606	0.0273226	0.0250405	0.0263942	0.0229777
0.49	0.0196199	0.0223254	0.0382712	0.0255568	0.0325338	0.0267411	0.0244776	0.0258277	0.0223884
0.5	0.0190015	0.0217738	0.0372339	0.024883	0.0318079	0.0261846	0.023923	0.0252813	0.0217811
0.51	0.018407	0.0212638	0.0361982	0.0242558	0.031056	0.025625	0.0233745	0.0247572	0.0212239
0.52	0.017838	0.0207888	0.0352111	0.0236232	0.0303538	0.0251086	0.022874	0.0242607	0.0206955
0.53	0.0172984	0.0202908	0.0342472	0.0230452	0.0296063	0.0246177	0.0224131	0.023788	0.0201894
0.54	0.0167807	0.019845	0.0332794	0.0224532	0.0289373	0.024177	0.0219721	0.0233246	0.0197202
0.55	0.0162813	0.0193821	0.0323783	0.0218929	0.0283101	0.02376	0.0215382	0.022891	0.0192659
0.56	0.0158148	0.0189476	0.0314992	0.0213599	0.027664	0.0233127	0.0211187	0.0224676	0.0188378
0.57	0.0153746	0.0185466	0.0305845	0.0208424	0.0270382	0.0229117	0.020727	0.0220513	0.0184342
0.58	0.014951	0.0181714	0.0296862	0.0203046	0.0264476	0.0225262	0.0203572	0.0216745	0.0180307
0.59	0.014549	0.0177886	0.0288312	0.0198047	0.0259237	0.0221643	0.0200285	0.0212979	0.017658
0.6	0.0141704	0.0174569	0.0279581	0.0193114	0.0253836	0.021833	0.0197087	0.0209466	0.0172899
0.61	0.0138058	0.0171225	0.0271166	0.0188495	0.0248543	0.0214863	0.0194165	0.02062	0.0169276
0.62	0.013475	0.0167767	0.0263005	0.0184026	0.024319	0.0211702	0.019127	0.0203024	0.016631
0.63	0.0131591	0.0164827	0.0254851	0.017953	0.0239341	0.0208849	0.0188643	0.0199864	0.0163164
0.64	0.0128562	0.0161808	0.0246923	0.017513	0.0235872	0.0205837	0.0185977	0.0197195	0.0160321
0.65	0.0125683	0.0158905	0.0239028	0.0171037	0.0231744	0.0203114	0.0183509	0.019454	0.0157388
0.66	0.0123032	0.0156368	0.0231394	0.0166782	0.0227402	0.0200379	0.0180826	0.019198	0.0154587
0.67	0.0120593	0.0154044	0.0223549	0.0162709	0.0223475	0.0197973	0.0178425	0.0189441	0.0151879
0.68	0.0118296	0.0151643	0.0216312	0.0159067	0.0219361	0.019559	0.0176068	0.0187062	0.0149197
0.69	0.0116114	0.0149147	0.0209356	0.0155546	0.0215548	0.0193346	0.0173842	0.0184881	0.0146703
0.7	0.011415	0.0146983	0.0202033	0.0152042	0.0211808	0.019129	0.0171669	0.0182669	0.0144525
0.71	0.0112303	0.0144891	0.0194803	0.0148519	0.0208272	0.0189052	0.0169322	0.0180703	0.0142341
0.72	0.0110536	0.0142667	0.0187724	0.0144997	0.0204696	0.0187318	0.0166855	0.017866	0.0140054
0.73	0.0108999	0.0141054	0.0180968	0.0141821	0.020107	0.0185238	0.0164747	0.0176713	0.0137969
0.74	0.0107566	0.0139038	0.0174553	0.013868	0.0197705	0.0183192	0.0162632	0.0174695	0.0136073
0.75	0.0106126	0.0137119	0.0168064	0.0135534	0.0193949	0.0181711	0.0160389	0.0172818	0.0133866
0.76	0.0104844	0.0135245	0.0161781	0.0132368	0.0190115	0.0179966	0.0158228	0.0170887	0.0131701
0.77	0.0103576	0.0133672	0.0155439	0.0129355	0.0186986	0.0178283	0.015609	0.0169033	0.0129867
0.78	0.0102493	0.0131706	0.0149006	0.012655	0.0183822	0.0176571	0.0153839	0.0167377	0.0128029
0.79	0.0101446	0.0129639	0.0142381	0.0123692	0.0181022	0.0174791	0.0151628	0.016566	0.0126219
0.8	0.0100398	0.0127756	0.0136073	0.0120803	0.0177244	0.0173092	0.0149529	0.0164004	0.0124621
0.81	0.00994147	0.0125859	0.0129802	0.0118213	0.0174104	0.0171509	0.0147446	0.0162286	0.0122948
0.82	0.00983923	0.0124053	0.0123231	0.0115688	0.017109	0.0170033	0.0145654	0.0160624	0.012123
0.83	0.00975329	0.012225	0.0116616	0.0113204	0.0167806	0.016842	0.0143828	0.0158906	0.011963
0.84	0.00967722	0.012022	0.0109864	0.0110677	0.0164882	0.0166787	0.0141947	0.0157319	0.0117888
0.85	0.00959441	0.0118349	0.0102892	0.0108231	0.0161692	0.0165131	0.0139947	0.015567	0.0116238
0.86	0.00951313	0.0116425	0.00963751	0.0105727	0.015869	0.0163608	0.013807	0.0153792	0.0114648
0.87	0.00944486	0.0114226	0.00896872	0.0103701	0.0155464	0.0162038	0.0136173	0.015219	0.0112898
0.88	0.0093768	0.0112281	0.00828155	0.0101488	0.0152678	0.0160511	0.0134483	0.0150457	0.0111217
0.89	0.00931953	0.0110109	0.00760935	0.0099432	0.0149912	0.0159261	0.0132504	0.0148883	0.0109472
0.9	0.00926178	0.0108147	0.00692174	0.00974678	0.0146963	0.015772	0.0130645	0.0147148	0.0107818
0.91	0.00919897	0.010631	0.00622904	0.00953627	0.014428	0.0156082	0.0128732	0.0145408	0.0106071
0.92	0.00913901	0.0104319	0.00554583	0.00934803	0.0141287	0.0154631	0.012704	0.0143627	0.0104257
0.93	0.00908479	0.0102464	0.00486527	0.0091401	0.0138265	0.0153556	0.0125091	0.0141927	0.0102325
0.94	0.00902579	0.0100314	0.00420332	0.00894991	0.0135606	0.0152122	0.0123414	0.0140278	0.0100481
0.95	0.0089666	0.00984799	0.00351514	0.00878757	0.0132947	0.0150766	0.0121799	0.0138463	0.00987971
0.96	0.00890603	0.00963752	0.00284329	0.00861284	0.0130662	0.0149497	0.0120092	0.0136735	0.0096917
0.97	0.00884783	0.00945704	0.00213142	0.0084273	0.0128558	0.014825	0.0118224	0.0135015	0.00949432
0.98	0.00877336	0.00924927	0.00146051	0.00826983	0.012632	0.0146793	0.0116565	0.0133223	0.00932132
0.99	0.00871367	0.00905019	0.00074973	0.00813096	0.0124939	0.0145719	0.0114777	0.013144	0.0091553

## Sheet: EGFR_after
	cell#1	cell#2	cell#3	cell#4	cell#5	cell#6	cell#7	cell#8	cell#9
0.01	0.00531439	0.00410626	0.00375852	0.00514503	0.00450164	0.00293692	0.00433331	0.00691087	0.00322713
0.02	0.0107659	0.00812082	0.00755849	0.0100501	0.00886146	0.00581706	0.00892727	0.0144904	0.00623969
0.03	0.0155914	0.0119871	0.0109478	0.0146118	0.013042	0.00842631	0.0131504	0.0210128	0.00923117
0.04	0.0198571	0.0155056	0.0140645	0.0185355	0.0168862	0.0108935	0.016966	0.0271156	0.0120729
0.05	0.0237227	0.0187278	0.0169466	0.0220541	0.0205134	0.0132267	0.0205267	0.0325104	0.0147603
0.06	0.0269901	0.0217783	0.0195704	0.0252189	0.0237635	0.0153193	0.0238952	0.0375195	0.0172989
0.07	0.0301878	0.0246445	0.0220482	0.0281372	0.0268385	0.0174075	0.0271361	0.0424595	0.0197672
0.08	0.0329711	0.0274662	0.0244782	0.0307568	0.0298152	0.0197156	0.0302727	0.0466706	0.0221754
0.09	0.0354245	0.0298667	0.0264741	0.0329733	0.0324151	0.0214546	0.0329117	0.0505861	0.0243918
0.1	0.0374905	0.0320202	0.0282313	0.0347396	0.0346841	0.0229833	0.0352005	0.0539365	0.0263411
0.11	0.0391736	0.0338739	0.029673	0.0362796	0.0365985	0.0241334	0.0371075	0.0567764	0.028085
0.12	0.0404771	0.0355009	0.0308516	0.0373953	0.0383263	0.0251805	0.0388288	0.0593464	0.0296532
0.13	0.0414303	0.0368699	0.0318317	0.0383078	0.039761	0.0260552	0.0401507	0.061265	0.0310033
0.14	0.0422363	0.0380073	0.0325994	0.0390323	0.04098	0.0267929	0.0412678	0.0628828	0.0321856
0.15	0.0428291	0.0389361	0.0331911	0.0395966	0.0419956	0.027359	0.0421767	0.0642644	0.0332176
0.16	0.043295	0.0396723	0.0336274	0.0398833	0.0428114	0.0277762	0.0429288	0.0653195	0.0340507
0.17	0.0434496	0.0402513	0.0339131	0.0400457	0.0434676	0.0280443	0.0434634	0.0661959	0.0347637
0.18	0.0434739	0.0406093	0.0340325	0.0400516	0.04396	0.0281715	0.0438551	0.0668848	0.0353313
0.19	0.0433394	0.0408059	0.0340521	0.039957	0.0443254	0.0282523	0.0441051	0.0674982	0.0357493
0.2	0.0431116	0.0408807	0.0339936	0.0397625	0.0445578	0.0282854	0.0442616	0.0679003	0.0360517
0.21	0.0427888	0.0407945	0.0338243	0.0394901	0.0446315	0.0282302	0.0442664	0.0682009	0.0362446
0.22	0.0423242	0.0405861	0.0335432	0.0391459	0.0446191	0.028028	0.0441571	0.0683423	0.0363249
0.23	0.0417054	0.0402604	0.0332064	0.0387101	0.0444791	0.0277972	0.043937	0.0681805	0.0363059
0.24	0.0410634	0.0398419	0.0327965	0.0381703	0.0442081	0.0274922	0.0436466	0.0679324	0.0361931
0.25	0.0403443	0.0393131	0.0323268	0.0375924	0.0438738	0.0271108	0.0432984	0.0675953	0.0359661
0.26	0.0396098	0.0387095	0.0318124	0.0369137	0.0434553	0.0267337	0.042815	0.0671268	0.0356596
0.27	0.0388426	0.0380366	0.0312427	0.0362366	0.0429628	0.0263367	0.0422736	0.0666172	0.0352721
0.28	0.0379765	0.0373014	0.0306272	0.0355245	0.0423981	0.0258617	0.0416456	0.0659677	0.0348234
0.29	0.0371574	0.0365011	0.0300105	0.0347898	0.0417607	0.0253366	0.0409787	0.0651303	0.0343171
0.3	0.0362717	0.0356448	0.0293498	0.0340471	0.0410803	0.0247597	0.0402856	0.0643713	0.033777
0.31	0.0353512	0.0347434	0.0286356	0.0332382	0.0403567	0.024232	0.0395657	0.0636277	0.0331867
0.32	0.0343808	0.0338038	0.027933	0.0323915	0.0396277	0.0236622	0.0388161	0.0627574	0.0325516
0.33	0.0334868	0.0328442	0.0272153	0.0315723	0.0388451	0.0231014	0.0380357	0.0618307	0.0318836
0.34	0.0325722	0.031879	0.0264876	0.0307478	0.0380637	0.0225142	0.0372604	0.0609962	0.0311694
0.35	0.0315861	0.030886	0.0257552	0.0299081	0.0372663	0.0219449	0.0364527	0.0600835	0.0304782
0.36	0.0306542	0.0299047	0.0250161	0.0290319	0.0364139	0.0213162	0.03563	0.0591499	0.0297188
0.37	0.029753	0.0289012	0.0243203	0.0281966	0.0355778	0.0206915	0.0347428	0.0582353	0.0289927
0.38	0.0287513	0.027924	0.0236072	0.0273551	0.0347538	0.0200299	0.0338837	0.0572307	0.0282375
0.39	0.0277959	0.0269475	0.0228884	0.0265424	0.0339239	0.0194162	0.033048	0.0562808	0.0275093
0.4	0.0268831	0.0259796	0.0222139	0.0257249	0.0330862	0.0188988	0.0321937	0.0553266	0.0267669
0.41	0.0259816	0.0250399	0.0215369	0.0249406	0.0322731	0.0183934	0.031351	0.0543199	0.0260338
0.42	0.0251098	0.02414	0.0208885	0.0241621	0.0314292	0.0178259	0.030506	0.0532468	0.0252956
0.43	0.0242539	0.0232292	0.0202435	0.0234255	0.030635	0.0172404	0.0297161	0.0522195	0.0245704
0.44	0.0233582	0.0223435	0.0196032	0.0226828	0.0298295	0.0167368	0.0289228	0.0511538	0.0238675
0.45	0.0224994	0.0215061	0.0190009	0.0219853	0.029104	0.0162097	0.0281605	0.050158	0.0231617
0.46	0.0216939	0.0206998	0.0184116	0.021301	0.0283709	0.0157662	0.0273965	0.0490994	0.0224778
0.47	0.020941	0.0199439	0.0178601	0.0206491	0.0276338	0.0152975	0.0266467	0.0479525	0.0218271
0.48	0.0202332	0.0192151	0.0173155	0.0200352	0.0269322	0.0148331	0.0259086	0.0469577	0.0211776
0.49	0.0195336	0.0185215	0.0168295	0.0194438	0.0262271	0.0143956	0.0251951	0.0458975	0.0205672
0.5	0.0188415	0.0178406	0.0163445	0.0188682	0.0255364	0.0139757	0.0245456	0.0448192	0.0199768
0.51	0.0181193	0.0171948	0.0158894	0.018328	0.0248599	0.0135951	0.0239236	0.0437887	0.0194043
0.52	0.0174492	0.0165904	0.0154262	0.0178066	0.024211	0.0132109	0.0232999	0.0426805	0.0188433
0.53	0.0168352	0.0160096	0.0149865	0.0173031	0.0235688	0.0128542	0.0226924	0.0415853	0.0183248
0.54	0.0162299	0.0154688	0.0145625	0.0168344	0.0229654	0.012525	0.0221398	0.0404926	0.0178206
0.55	0.01567	0.014972	0.0141796	0.0164096	0.0223856	0.0121815	0.0216023	0.0393893	0.0173437
0.56	0.0151279	0.0144853	0.0138255	0.0159758	0.02183	0.0119099	0.0210812	0.0383214	0.0169025
0.57	0.0146126	0.0140041	0.0134713	0.0155434	0.0212461	0.0116069	0.020592	0.0372609	0.0164719
0.58	0.0140734	0.0135655	0.0131477	0.0151396	0.0206881	0.0113307	0.0201204	0.0361186	0.0160693
0.59	0.0136003	0.0131477	0.012837	0.0147606	0.0201542	0.0110487	0.0196542	0.0350694	0.0156799
0.6	0.013159	0.0127698	0.0125324	0.0143927	0.0196638	0.0108165	0.0191913	0.0339251	0.0153118
0.61	0.0127249	0.0124431	0.0122474	0.0140345	0.0191857	0.0106061	0.0187771	0.0329022	0.0149619
0.62	0.0123291	0.0121328	0.0119699	0.0137236	0.0186659	0.0103809	0.0183893	0.0319105	0.0146366
0.63	0.0119496	0.0118346	0.011715	0.0134017	0.0182214	0.0101993	0.0180247	0.03091	0.0143202
0.64	0.0115614	0.0115691	0.0114444	0.0131125	0.0177743	0.0100273	0.0176362	0.0299884	0.0140163
0.65	0.0111901	0.0113301	0.011185	0.0128276	0.0173451	0.00984803	0.0172961	0.0290522	0.0137418
0.66	0.0107921	0.011087	0.0109583	0.0125561	0.0169425	0.00968267	0.0169131	0.0281985	0.0134771
0.67	0.0104123	0.0108749	0.0107144	0.0122765	0.0165773	0.00952249	0.0165938	0.0272908	0.0132291
0.68	0.0100641	0.01067	0.0104696	0.0120214	0.0161818	0.00937724	0.0162914	0.0264465	0.0129859
0.69	0.0097353	0.0104687	0.0102451	0.0117767	0.0158111	0.00925645	0.0159754	0.0256136	0.0127729
0.7	0.00941706	0.010276	0.010013	0.0115298	0.0154382	0.00913581	0.0156331	0.0247558	0.0125642
0.71	0.00912402	0.0101179	0.0097893	0.0113098	0.0150775	0.00902233	0.0153255	0.023969	0.0123485
0.72	0.00881135	0.00996185	0.00955624	0.0110663	0.0147127	0.00886174	0.0150645	0.0231425	0.0121576
0.73	0.00846593	0.00980709	0.0093203	0.0108409	0.0143924	0.00871474	0.0147747	0.0223886	0.0119556
0.74	0.00813399	0.00965103	0.00909407	0.0106015	0.0140586	0.00862532	0.0145148	0.0215942	0.0117751
0.75	0.00784192	0.00951115	0.00887874	0.0104132	0.0137278	0.00855176	0.0142768	0.02085	0.0115967
0.76	0.00754802	0.00937719	0.00866002	0.0102058	0.0134159	0.00844522	0.0140206	0.0201552	0.0114246
0.77	0.00726485	0.00921653	0.00845023	0.00997424	0.0130948	0.00834623	0.0137766	0.0194413	0.0112445
0.78	0.00698787	0.00909077	0.00825325	0.00972671	0.012806	0.00823356	0.0135467	0.0187073	0.0110914
0.79	0.00669839	0.00894597	0.00804649	0.00953729	0.012505	0.00812082	0.0133346	0.0180075	0.0109392
0.8	0.00645688	0.00880329	0.00783984	0.00933256	0.0122201	0.00799833	0.0130957	0.0173423	0.0107898
0.81	0.00620484	0.00866854	0.00764552	0.00915913	0.0119302	0.00790284	0.0128843	0.0166943	0.0106408
0.82	0.00594573	0.00854485	0.00743903	0.00893735	0.0116425	0.00778449	0.0126654	0.0159767	0.0105094
0.83	0.00571162	0.00840978	0.00723362	0.00874981	0.0113636	0.00764778	0.0124565	0.0152818	0.010378
0.84	0.00545272	0.00828801	0.00704769	0.00856722	0.0110846	0.00752034	0.0122461	0.0145826	0.0102376
0.85	0.00519576	0.00817662	0.00685746	0.00836834	0.0108053	0.00737522	0.0120177	0.0138621	0.0100922
0.86	0.00491942	0.00804129	0.00668879	0.0081829	0.0105245	0.00729397	0.0118215	0.0132157	0.00995149
0.87	0.00466425	0.00792792	0.00650942	0.00798156	0.0102582	0.00721179	0.01159	0.0125487	0.00981936
0.88	0.00443073	0.00777562	0.00632809	0.00780803	0.00999757	0.00709491	0.0113625	0.0118297	0.00968081
0.89	0.0041986	0.00763806	0.00613938	0.00762775	0.00974581	0.0070032	0.0111554	0.0111136	0.00955752
0.9	0.00396193	0.00750282	0.00594544	0.0074359	0.00949515	0.00688243	0.0109111	0.0104279	0.00943284
0.91	0.00369126	0.00735327	0.0057668	0.00723457	0.00924544	0.00675141	0.0106527	0.0097599	0.00929134
0.92	0.00342422	0.0072306	0.00558909	0.00701026	0.00896372	0.00661369	0.0103976	0.00897676	0.0091622
0.93	0.00312376	0.00709763	0.00541288	0.00680505	0.00872193	0.00647817	0.0101422	0.00822124	0.00904233
0.94	0.0028408	0.00697591	0.00523194	0.00659027	0.00849359	0.00636961	0.00989147	0.0075642	0.00891001
0.95	0.00257258	0.00685186	0.00506149	0.00636853	0.00826144	0.00625974	0.00965057	0.00684849	0.00879096
0.96	0.00229624	0.00672852	0.00489586	0.00614031	0.00804043	0.00614381	0.00938963	0.00620241	0.00866806
0.97	0.00200189	0.00659504	0.00472836	0.00591119	0.00783984	0.00602165	0.00912903	0.00550204	0.00854569
0.98	0.00172797	0.00646778	0.00456219	0.0056968	0.00764011	0.00591816	0.00884716	0.00484242	0.00842345
0.99	0.00145031	0.00635596	0.00439052	0.00544889	0.00742922	0.00579276	0.00857712	0.00419929	0.00829463

## Sheet: PS_before
	cell#1	cell#2	cell#3	cell#4	cell#5	cell#6	cell#7	cell#8	cell#9	cell#10
0.01	0.0145598	0.0147041	0.0134904	0.0146601	0.0127411	0.0128545	0.010145	0.00900429	0.009089	0.0147155
0.02	0.0275903	0.0279873	0.0253395	0.0273275	0.024078	0.0238303	0.0200019	0.017255	0.0177376	0.0272062
0.03	0.0376206	0.0393144	0.0350569	0.0368425	0.0334166	0.0323398	0.0293751	0.0246005	0.0257696	0.0365986
0.04	0.0449568	0.0482975	0.0423124	0.0430751	0.0406375	0.0386929	0.0380511	0.0306837	0.0330979	0.0432851
0.05	0.0501462	0.0552387	0.0476932	0.0469952	0.0461674	0.0431772	0.0459551	0.0358627	0.0396973	0.0479595
0.06	0.0536847	0.0607942	0.0517354	0.0492241	0.0504751	0.0464818	0.0531249	0.0403076	0.0455822	0.0511589
0.07	0.0562126	0.0652434	0.0548426	0.0505827	0.0537955	0.0490379	0.0595696	0.0441138	0.0508858	0.0534197
0.08	0.0581462	0.0689141	0.0572165	0.0513554	0.0564727	0.0510491	0.0652936	0.0473907	0.0556472	0.0552321
0.09	0.0594735	0.0716946	0.0589936	0.0517346	0.0585751	0.0525569	0.0702313	0.0500895	0.0597793	0.0565225
0.1	0.0604912	0.0738093	0.0602753	0.0517899	0.0601883	0.0536544	0.0744341	0.0523158	0.0632694	0.0573868
0.11	0.0610122	0.0753564	0.0610653	0.0515449	0.0613169	0.0544331	0.0779331	0.0540635	0.0662037	0.0579974
0.12	0.0613637	0.0763902	0.0614807	0.0511198	0.0620422	0.0549141	0.0807731	0.0553913	0.0686291	0.0582787
0.13	0.0613741	0.0770267	0.0615681	0.0505248	0.0624731	0.0551803	0.0830347	0.0563827	0.0705569	0.0583187
0.14	0.0611721	0.0772344	0.0613814	0.0497379	0.0625879	0.0551369	0.0847422	0.0570689	0.0720493	0.0580512
0.15	0.0608031	0.0771313	0.0609762	0.0488708	0.0624024	0.0549297	0.0859431	0.0574579	0.0731373	0.0576107
0.16	0.0602768	0.076804	0.060403	0.0478651	0.0619743	0.0545279	0.0866929	0.0576015	0.07386	0.0569861
0.17	0.0596321	0.0761966	0.0596614	0.0467875	0.061402	0.054048	0.0869834	0.0575011	0.0742349	0.0562061
0.18	0.0588964	0.0753435	0.0587476	0.0457078	0.0606067	0.0533662	0.0869052	0.0572057	0.0743231	0.0553342
0.19	0.0580389	0.0743392	0.0576688	0.0445181	0.0596773	0.0525945	0.0864532	0.0567712	0.074102	0.0543724
0.2	0.0571117	0.0731263	0.0565087	0.0432776	0.0586438	0.0517062	0.0856779	0.0561769	0.0736445	0.0533363
0.21	0.0561666	0.071851	0.0552335	0.0420055	0.0574972	0.0507221	0.0846205	0.055457	0.0729641	0.0522
0.22	0.0551268	0.070407	0.0539014	0.0407293	0.0562841	0.0496482	0.0832913	0.0546363	0.0720955	0.0509949
0.23	0.0540582	0.0688408	0.0524892	0.0394545	0.0549684	0.0485823	0.0817356	0.0536907	0.0710265	0.0497567
0.24	0.0529677	0.0672075	0.0510556	0.0382152	0.0535643	0.0473844	0.0799687	0.0526429	0.0698155	0.0484693
0.25	0.0518709	0.0655169	0.0496	0.0368964	0.0521077	0.0462061	0.0780072	0.0515293	0.0684725	0.0471549
0.26	0.0507618	0.0637895	0.048108	0.0356392	0.0505834	0.0449812	0.0759087	0.0503532	0.0670049	0.0457986
0.27	0.0496361	0.062068	0.0465954	0.0343944	0.049001	0.0437177	0.0736766	0.0491074	0.0654267	0.0444356
0.28	0.0485361	0.0603153	0.0450492	0.0330856	0.0473819	0.0424404	0.0713423	0.0478367	0.0637624	0.0431007
0.29	0.0474075	0.0585601	0.0435354	0.0318434	0.0457808	0.0411588	0.0688954	0.0465119	0.0620309	0.0417241
0.3	0.0462615	0.0567016	0.042008	0.0306222	0.0441913	0.0398726	0.0663792	0.0451707	0.0602498	0.0403408
0.31	0.0451516	0.0549565	0.0404586	0.0294811	0.0425876	0.0386294	0.0637886	0.043817	0.058416	0.0389954
0.32	0.0440524	0.0531945	0.0389725	0.0283362	0.0409651	0.0373656	0.0611764	0.0424465	0.0565587	0.0376282
0.33	0.0429014	0.0514128	0.0374803	0.0272139	0.0393793	0.036069	0.05854	0.0410548	0.0546949	0.0362841
0.34	0.0417952	0.0496085	0.0360328	0.0260801	0.0377941	0.0347828	0.0558953	0.0396936	0.0528074	0.0349455
0.35	0.0407443	0.0477777	0.0345647	0.0250402	0.0362549	0.0334943	0.0532599	0.0383272	0.0509268	0.033705
0.36	0.0397514	0.0459816	0.0331678	0.0240505	0.0347448	0.032235	0.0506578	0.0369752	0.0490579	0.0324126
0.37	0.0387074	0.0442231	0.0317665	0.0231014	0.0332666	0.0310219	0.0480746	0.0356628	0.0472009	0.0311829
0.38	0.0376877	0.0425197	0.0304543	0.0221722	0.0318484	0.0298428	0.0455529	0.0343728	0.0453784	0.0300204
0.39	0.0367496	0.0408504	0.0291571	0.0212942	0.030492	0.0287042	0.0430773	0.0331128	0.0435933	0.0288745
0.4	0.0357985	0.0391907	0.0279171	0.020429	0.0291654	0.0275901	0.0406908	0.031897	0.041843	0.0277703
0.41	0.0348894	0.0376006	0.0266907	0.0196439	0.0278987	0.0265201	0.038369	0.030749	0.0401473	0.0267344
0.42	0.0339965	0.036071	0.0255249	0.0188434	0.0267137	0.0255227	0.0361433	0.0296269	0.0385152	0.0257685
0.43	0.0330643	0.034608	0.0244239	0.0181255	0.0255903	0.024573	0.0340039	0.0285444	0.0369418	0.0248132
0.44	0.0321646	0.0331964	0.0233611	0.0173706	0.0245113	0.0236631	0.0319614	0.0275084	0.0354399	0.0239148
0.45	0.0313282	0.0318215	0.0223519	0.0167142	0.0235111	0.0228244	0.0300354	0.0265412	0.0339929	0.0231081
0.46	0.0305424	0.0304486	0.0214094	0.0160718	0.0225735	0.0220517	0.0282129	0.0256326	0.0326232	0.0223265
0.47	0.0297723	0.0291167	0.0205337	0.0154429	0.0217121	0.0212966	0.0264956	0.0247849	0.0313407	0.0215872
0.48	0.0289823	0.0278424	0.0197237	0.0148109	0.0208959	0.0206173	0.0248911	0.023986	0.0301166	0.0209025
0.49	0.0282349	0.0266074	0.0189355	0.0142497	0.0201765	0.0199967	0.0234097	0.0232606	0.0289693	0.0202204
0.5	0.0275088	0.0254205	0.0182408	0.013658	0.0194952	0.0194716	0.0220396	0.0225693	0.0278867	0.0196138
0.51	0.0268119	0.0243281	0.0176261	0.0131137	0.0188789	0.018991	0.0207686	0.0219154	0.0268684	0.0190139
0.52	0.026131	0.0232674	0.0170321	0.0126092	0.0182837	0.0185107	0.0196077	0.0213318	0.0259176	0.0184748
0.53	0.0254809	0.0222906	0.0164891	0.0121239	0.0177536	0.0180497	0.0185686	0.0207737	0.0250347	0.0179901
0.54	0.0248528	0.0213572	0.015982	0.0116846	0.0172951	0.0176206	0.0176242	0.0202805	0.0242047	0.01752
0.55	0.0242625	0.0204892	0.0155295	0.0112573	0.016858	0.0171975	0.0168007	0.0198019	0.0234447	0.0170887
0.56	0.0236436	0.0196631	0.015084	0.0108272	0.0164666	0.0168472	0.0160507	0.0193802	0.0227356	0.0166669
0.57	0.0230972	0.0189024	0.0146827	0.0104528	0.0161499	0.0165052	0.0154024	0.0189805	0.0220715	0.01627
0.58	0.0225292	0.0181511	0.0142993	0.0101353	0.0158395	0.0161777	0.0148416	0.0186057	0.021466	0.0158946
0.59	0.0220228	0.017486	0.0138836	0.00978207	0.015573	0.015859	0.0143639	0.018281	0.0209004	0.0155311
0.6	0.0215207	0.0168274	0.0135166	0.00951125	0.0153466	0.0156008	0.0139529	0.0179915	0.0203904	0.0151838
0.61	0.0210288	0.0162045	0.013173	0.00920611	0.0151459	0.015337	0.0136043	0.017714	0.0199071	0.0148527
0.62	0.0205423	0.015636	0.0127931	0.00893923	0.0149727	0.0151068	0.0133127	0.0174494	0.0194684	0.0145481
0.63	0.0200392	0.0150672	0.0125041	0.00867641	0.0148	0.0148908	0.013062	0.0172114	0.0190647	0.0142505
0.64	0.0195793	0.0145588	0.0122012	0.00844542	0.0146118	0.0146788	0.0128527	0.0169851	0.0187092	0.013975
0.65	0.0191278	0.0140999	0.0119555	0.00820783	0.0144423	0.0144748	0.0127055	0.0167517	0.0183619	0.0137064
0.66	0.0186979	0.0136633	0.0117173	0.00797807	0.0142558	0.0142448	0.012567	0.0165357	0.0180242	0.0134343
0.67	0.0182898	0.0132391	0.0115002	0.00779806	0.0140457	0.0140503	0.0124601	0.0163312	0.0177172	0.0131788
0.68	0.0178917	0.0127923	0.0112882	0.00759719	0.0138519	0.0138577	0.0123891	0.0161387	0.0174265	0.0129433
0.69	0.0175286	0.0123495	0.0110876	0.00742126	0.0136488	0.013704	0.0123313	0.0159526	0.0171257	0.0126828
0.7	0.0171725	0.0118925	0.0109029	0.00724885	0.0134506	0.0135565	0.0122941	0.0157789	0.0168402	0.0124466
0.71	0.0168076	0.0114621	0.0107231	0.00710476	0.0132288	0.0133817	0.0122633	0.0156036	0.0165686	0.0122169
0.72	0.0165127	0.0110203	0.0105252	0.00695564	0.0130232	0.0132	0.0122343	0.0154288	0.0163194	0.0119506
0.73	0.0161885	0.0105949	0.010362	0.00684099	0.0128076	0.0130231	0.0122205	0.0152601	0.0160739	0.0117118
0.74	0.0159153	0.0101573	0.0101897	0.00673191	0.0125857	0.0128592	0.0122164	0.0150873	0.0158318	0.0114738
0.75	0.0156164	0.00977669	0.00999428	0.00660797	0.0123458	0.0126877	0.0122063	0.0149049	0.0156089	0.0112448
0.76	0.0153399	0.00941989	0.00977851	0.00648402	0.0121072	0.0125103	0.012215	0.0147354	0.0153962	0.0110344
0.77	0.01508	0.00901705	0.00954759	0.00638665	0.0118847	0.012314	0.0122141	0.0145642	0.0151721	0.0107965
0.78	0.0148493	0.00864063	0.0093077	0.00628998	0.0116666	0.0120868	0.0122132	0.0143832	0.0149668	0.0105746
0.79	0.0146209	0.00825373	0.00907891	0.00620194	0.0114684	0.0118817	0.0122199	0.0142015	0.0147586	0.0103532
0.8	0.0144113	0.00789457	0.00883653	0.00615446	0.0112688	0.0116259	0.0122306	0.0140319	0.014552	0.0101503
0.81	0.0142104	0.00749417	0.00855707	0.00607204	0.0110625	0.0113704	0.0122392	0.0138719	0.0143441	0.00992164
0.82	0.013985	0.00712724	0.00827311	0.00597495	0.0108667	0.0111229	0.0122438	0.0137049	0.0141334	0.0097162
0.83	0.0137543	0.006741	0.00798774	0.00585979	0.0106857	0.0108819	0.012249	0.0135614	0.0139259	0.00951686
0.84	0.0135465	0.00633077	0.0077076	0.00575227	0.0105002	0.0106449	0.0122448	0.0133957	0.0137158	0.00931117
0.85	0.013352	0.00591257	0.00742891	0.00561364	0.0103431	0.0103966	0.0122428	0.0132336	0.0134878	0.00913281
0.86	0.0131421	0.00549328	0.00714527	0.00550923	0.0101766	0.010168	0.0122402	0.0130785	0.0132678	0.00894544
0.87	0.0129306	0.00505753	0.00682048	0.00541476	0.0100131	0.00991356	0.0122358	0.0129136	0.0130587	0.00877245
0.88	0.0127378	0.00459614	0.00654516	0.00532074	0.00984389	0.00966429	0.0122186	0.0127518	0.0128331	0.00857743
0.89	0.0125592	0.00418642	0.00625499	0.00523777	0.00968759	0.00941525	0.0122096	0.0125711	0.0126122	0.00835178
0.9	0.0123717	0.00372122	0.00596371	0.00516242	0.00951624	0.0091613	0.0121902	0.0123992	0.0123692	0.00813822
0.91	0.0122043	0.00328125	0.00566343	0.00509724	0.0093501	0.00891742	0.0121719	0.0122283	0.012127	0.00791431
0.92	0.0119687	0.00288631	0.00537881	0.00499143	0.00916228	0.00871038	0.0121448	0.0120641	0.0118728	0.00769161
0.93	0.0118001	0.0024668	0.00507537	0.00488478	0.00898437	0.00849863	0.012125	0.0118969	0.0116204	0.00749259
0.94	0.0115816	0.00205832	0.00477009	0.00476735	0.00881764	0.00827581	0.0120877	0.0117115	0.0113661	0.00727599
0.95	0.0113344	0.0016553	0.00447229	0.00461711	0.00864495	0.00804979	0.0120383	0.011528	0.0111085	0.00708117
0.96	0.0110762	0.00124426	0.00415834	0.00449176	0.00846109	0.00781355	0.0119834	0.0113238	0.0108569	0.00688099
0.97	0.0107963	0.000843485	0.00383893	0.00434566	0.00827089	0.00757575	0.0119181	0.0111116	0.010586	0.0066715
0.98	0.0105219	0.000469052	0.00353778	0.00420415	0.00809039	0.00733087	0.0118485	0.0108882	0.0103025	0.00645158
0.99	0.0102317	6.69477e-05	0.00322134	0.00408894	0.00791584	0.00706932	0.0117625	0.0106819	0.0100207	0.00626207

## Sheet: PS_after
	cell#1	cell#2	cell#3	cell#4	cell#5	cell#6	cell#7	cell#8	cell#9
0.01	0.0112861	0.0127019	0.00887396	0.0123245	0.0102722	0.0114329	0.0154534	0.0177397	0.0146636
0.02	0.0213694	0.0235114	0.0165975	0.0229675	0.0203501	0.0221758	0.0296814	0.0338702	0.0289219
0.03	0.0297311	0.0320214	0.0228344	0.0310241	0.0297696	0.031671	0.0421503	0.0479725	0.0423742
0.04	0.0365078	0.0380337	0.0274133	0.0369848	0.0385063	0.0398667	0.0524832	0.0602232	0.0549545
0.05	0.0418547	0.0421681	0.0309016	0.0414511	0.0464599	0.0468924	0.0609948	0.0701626	0.0664324
0.06	0.0460407	0.0451187	0.0335241	0.0445305	0.0535654	0.0527802	0.0679786	0.0786033	0.0768103
0.07	0.0494297	0.0470989	0.0356194	0.0467947	0.0599757	0.0578604	0.0739778	0.0854699	0.0861682
0.08	0.0523114	0.0485803	0.0373397	0.04859	0.0656852	0.0622514	0.0790196	0.0913369	0.0944522
0.09	0.0546714	0.0495511	0.038616	0.0498406	0.07062	0.0658567	0.083064	0.096189	0.101652
0.1	0.0564724	0.0501425	0.0396201	0.0507828	0.0747801	0.0688486	0.0863878	0.0996971	0.107808
0.11	0.0578616	0.050462	0.0403067	0.0513648	0.0783467	0.071181	0.0888441	0.102424	0.113001
0.12	0.0588325	0.0504403	0.0407214	0.0516157	0.0812626	0.0729359	0.0906179	0.104435	0.117297
0.13	0.0594239	0.0502271	0.0409067	0.0515752	0.0835389	0.0742375	0.0918725	0.10585	0.120791
0.14	0.059732	0.0498527	0.0409027	0.0513237	0.0853246	0.075114	0.0927036	0.106644	0.123516
0.15	0.0597332	0.0492775	0.0407306	0.0508187	0.0866174	0.0756908	0.093197	0.107033	0.125564
0.16	0.0594957	0.0486052	0.0403633	0.0501259	0.087452	0.0758465	0.0932362	0.106999	0.126969
0.17	0.0590354	0.0478188	0.0399333	0.0492894	0.0879127	0.0757025	0.0929624	0.106627	0.127823
0.18	0.0583701	0.0469159	0.0393767	0.0483582	0.0879872	0.0753584	0.0924072	0.105926	0.128156
0.19	0.0575481	0.0459224	0.0387562	0.047258	0.0877409	0.0747349	0.0916031	0.104947	0.128023
0.2	0.0565594	0.044857	0.0380222	0.0461279	0.0871899	0.0739337	0.0904902	0.103732	0.127469
0.21	0.0554803	0.0437152	0.0372201	0.0448606	0.0863863	0.0729563	0.0892659	0.102245	0.126576
0.22	0.0543722	0.0425287	0.0363742	0.0436419	0.0853382	0.0718414	0.0878948	0.10057	0.125317
0.23	0.0531105	0.0412988	0.0354621	0.0423966	0.0841051	0.0705143	0.0862841	0.0988411	0.12378
0.24	0.0517982	0.0399956	0.0345513	0.041071	0.0826656	0.0691202	0.0846003	0.0968565	0.12199
0.25	0.0504222	0.0387504	0.0335699	0.0397186	0.0810438	0.0676451	0.0827956	0.0947571	0.119945
0.26	0.0489457	0.0374457	0.0325476	0.0383711	0.0792679	0.0660676	0.0809272	0.0926214	0.117735
0.27	0.0474415	0.0361263	0.0315062	0.0369737	0.0773533	0.0644344	0.0789397	0.0903837	0.115304
0.28	0.0458755	0.0348399	0.0304374	0.035615	0.0753755	0.0627142	0.0769484	0.0880727	0.11271
0.29	0.0442834	0.0335374	0.0293982	0.0342328	0.0732922	0.0609248	0.0748661	0.085659	0.110009
0.3	0.0427255	0.0322327	0.0283469	0.032843	0.0711161	0.059134	0.0728194	0.0833185	0.107185
0.31	0.0411409	0.0309675	0.0272769	0.031534	0.0688924	0.0572918	0.0706813	0.0808685	0.104258
0.32	0.0395316	0.0296908	0.0262493	0.0302261	0.0666126	0.055461	0.0685667	0.0784917	0.101265
0.33	0.037943	0.0284017	0.0252082	0.0288829	0.0643138	0.0535798	0.066388	0.0761093	0.0982347
0.34	0.0363742	0.0271216	0.0242279	0.0275782	0.0619862	0.0516876	0.0643172	0.0736927	0.0951414
0.35	0.0348266	0.0258739	0.0232069	0.0263646	0.0596676	0.0498005	0.0622034	0.0713225	0.092011
0.36	0.033316	0.0247047	0.022244	0.0251475	0.0573471	0.0479286	0.0601979	0.0690094	0.0888659
0.37	0.0317977	0.0235509	0.0213071	0.0239914	0.0550473	0.0460761	0.0581871	0.0667567	0.0857128
0.38	0.0303242	0.0223919	0.0203721	0.022867	0.0527586	0.0442298	0.056214	0.0644786	0.0825632
0.39	0.0288847	0.0213042	0.0194935	0.0217547	0.0505199	0.0423939	0.054298	0.0623856	0.0794453
0.4	0.0275075	0.0202419	0.0186396	0.0207149	0.0483182	0.0406203	0.0523504	0.0602987	0.0763919
0.41	0.0261464	0.0192463	0.0178091	0.0197129	0.0461559	0.0388793	0.0504622	0.0582664	0.073369
0.42	0.024833	0.0183679	0.0170236	0.0187679	0.0440703	0.0371561	0.0486536	0.0562288	0.0703803
0.43	0.0236134	0.0175043	0.0162662	0.0179156	0.0420508	0.0354954	0.046941	0.0542465	0.0674729
0.44	0.022385	0.0166697	0.0155536	0.0171006	0.0400869	0.0339013	0.045256	0.0523315	0.0646429
0.45	0.0212284	0.0159011	0.014868	0.0162834	0.0382048	0.0324034	0.0436579	0.0504478	0.0618971
0.46	0.0201151	0.01522	0.0142318	0.0155496	0.0364041	0.0309424	0.0421033	0.0486172	0.0592424
0.47	0.0190558	0.0145723	0.0136373	0.0148353	0.0346803	0.0295612	0.0406326	0.0467966	0.056661
0.48	0.0180276	0.0139444	0.0130881	0.014182	0.0330587	0.0282238	0.0392257	0.0451015	0.0542169
0.49	0.0171072	0.0133734	0.0125514	0.013565	0.0315067	0.0269656	0.0378493	0.0434631	0.0518661
0.5	0.0161916	0.01289	0.0120531	0.0130153	0.0300468	0.0257905	0.0365741	0.0419382	0.0496334
0.51	0.0153169	0.0124195	0.0116067	0.0125028	0.0286582	0.0247282	0.0353426	0.0404611	0.0474996
0.52	0.0144738	0.0120035	0.011177	0.0120449	0.0273845	0.0237001	0.0342068	0.0391586	0.0454661
0.53	0.0136958	0.0116157	0.0107769	0.0116097	0.0261826	0.0227613	0.0331101	0.0378535	0.0435492
0.54	0.0129751	0.0112543	0.0104126	0.0112336	0.0250684	0.0219175	0.0320819	0.0367212	0.0417415
0.55	0.0122927	0.0109733	0.0100861	0.0108798	0.0240357	0.0211327	0.0311072	0.0356417	0.0400521
0.56	0.01161	0.0107229	0.00975772	0.0105509	0.0230849	0.0204083	0.0302067	0.0345543	0.0384557
0.57	0.0109417	0.0105144	0.00946716	0.0102351	0.0222085	0.0197033	0.0294003	0.0336255	0.0369534
0.58	0.010304	0.0103303	0.00920832	0.00990094	0.021417	0.0190928	0.0285819	0.0327559	0.0355692
0.59	0.00970786	0.0101867	0.00894347	0.00961159	0.0206791	0.0185196	0.0278212	0.0319012	0.0342911
0.6	0.00911455	0.0100732	0.0086853	0.00930317	0.0200132	0.0179893	0.027056	0.0310956	0.0330756
0.61	0.00858028	0.00992415	0.00847211	0.0090209	0.0194066	0.017508	0.0263512	0.0302608	0.0319612
0.62	0.00805041	0.00979877	0.00826295	0.00872797	0.0188464	0.0170422	0.0257086	0.0295264	0.0309255
0.63	0.00753752	0.00969212	0.00808066	0.00845124	0.0183507	0.0166077	0.0250856	0.0287636	0.0299792
0.64	0.00704911	0.00956619	0.0078707	0.00813027	0.017896	0.0162325	0.0244845	0.0279831	0.0291112
0.65	0.00658033	0.0094758	0.00767095	0.00781152	0.0174929	0.0158625	0.0238687	0.0271566	0.0283087
0.66	0.00610372	0.00941102	0.00747967	0.0074613	0.0171252	0.0155601	0.0232606	0.0263735	0.0275682
0.67	0.005662	0.00935754	0.00730155	0.00714337	0.0168008	0.0152944	0.0226853	0.0256661	0.0268945
0.68	0.00521177	0.00928373	0.0071062	0.00683113	0.0165005	0.0150514	0.0220854	0.0248875	0.0262655
0.69	0.00480714	0.00921764	0.00693009	0.00650008	0.0162272	0.0148361	0.0215139	0.0241173	0.0256672
0.7	0.0043992	0.00917982	0.00677142	0.00619336	0.0159814	0.0146302	0.0209813	0.0234729	0.0251221
0.71	0.0040051	0.00911012	0.00658703	0.00587916	0.0157552	0.0144877	0.0203939	0.022837	0.0245954
0.72	0.00358595	0.00902477	0.00642413	0.00553978	0.0155544	0.0143792	0.0198457	0.0221558	0.0241046
0.73	0.00316825	0.00899044	0.00624383	0.00520056	0.0153671	0.0142457	0.0192975	0.0214789	0.023653
0.74	0.00274262	0.00887437	0.00608372	0.00486739	0.0152022	0.014114	0.0187774	0.0208243	0.0232166
0.75	0.00232611	0.00881069	0.00591568	0.00455709	0.0150531	0.0139931	0.0182338	0.0202479	0.0228115
0.76	0.00192224	0.00870742	0.00575021	0.00423661	0.0149011	0.0138668	0.0177061	0.0196223	0.0224394
0.77	0.00152736	0.00859848	0.00558909	0.0038944	0.0147568	0.0137376	0.017199	0.0189737	0.0220751
0.78	0.00114259	0.00849923	0.00538933	0.00352428	0.0146118	0.0136164	0.0166888	0.0183327	0.0217261
0.79	0.000768863	0.00837741	0.00521023	0.00317052	0.0144778	0.013488	0.0161792	0.0177105	0.0213796
0.8	0.000386524	0.00828892	0.00501486	0.00281202	0.0143303	0.0133896	0.0157111	0.0170715	0.0210375
0.81	-1.70768e-06	0.00819828	0.00482969	0.002465	0.0141956	0.0132693	0.015251	0.0164625	0.0206958
0.82	-0.000393367	0.0080988	0.00462644	0.00209212	0.0140616	0.0131366	0.0147553	0.0158256	0.0203384
0.83	-0.000767034	0.00798176	0.0044503	0.00173342	0.0139233	0.0129982	0.0142868	0.0152111	0.0199977
0.84	-0.00110824	0.00787634	0.00425408	0.00136383	0.0137726	0.0128579	0.0138777	0.0146192	0.019613
0.85	-0.00144833	0.00774485	0.00406599	0.0010148	0.0136328	0.0127193	0.013438	0.0140448	0.0192272
0.86	-0.00179847	0.00761919	0.00386213	0.000646116	0.0134871	0.0125747	0.0130317	0.0134714	0.0188037
0.87	-0.00215309	0.00749065	0.00364393	0.000262169	0.0133376	0.0124205	0.0126248	0.0129172	0.018413
0.88	-0.00249885	0.0073313	0.00343817	-9.27603e-05	0.0131844	0.012246	0.0122322	0.0123477	0.0179713
0.89	-0.00285601	0.00716723	0.0032275	-0.000423065	0.0130212	0.0120679	0.011856	0.0117647	0.0175226
0.9	-0.00322157	0.00702086	0.00304561	-0.000792962	0.0128787	0.0118655	0.0114396	0.0111872	0.0170536
0.91	-0.00358397	0.0068554	0.00285153	-0.00115904	0.0127182	0.0116728	0.0110472	0.0105462	0.0165676
0.92	-0.00391373	0.00670991	0.00265535	-0.00150954	0.0125548	0.0114761	0.0106453	0.00993711	0.0160589
0.93	-0.0042424	0.0065427	0.00243326	-0.00187709	0.0123804	0.0112741	0.0102399	0.00928958	0.0155495
0.94	-0.00455759	0.00638503	0.00225014	-0.00226743	0.0122137	0.0110561	0.00987847	0.00863331	0.0150243
0.95	-0.00486132	0.00627062	0.00206929	-0.0026308	0.0120472	0.0108369	0.00951835	0.00801191	0.0144943
0.96	-0.00517596	0.00613504	0.00189991	-0.00299625	0.0118615	0.0106153	0.00915444	0.00738414	0.0139568
0.97	-0.00547726	0.00603029	0.00170753	-0.00338612	0.0116722	0.0103907	0.00879434	0.00680142	0.0134065
0.98	-0.00579143	0.0059046	0.00151716	-0.00377366	0.0114675	0.0101519	0.00842963	0.00616678	0.0128506
0.99	-0.00608624	0.00578118	0.00131447	-0.00418788	0.011279	0.00993117	0.00807832	0.00546075	0.0122866

## Sheet: PI(4,5)P2_before
	cell#1	cell#2	cell#3	cell#4	cell#5	cell#6	cell#7	cell#8	cell#9
0.01	0.0076825	0.00713467	0.0059419	0.0114343	0.00947986	0.00659984	0.0106019	0.00742541	0.00842157
0.02	0.015256	0.0144581	0.0122746	0.0225289	0.0189215	0.0131358	0.0213312	0.0148495	0.0167752
0.03	0.0224557	0.0212838	0.0181258	0.0329593	0.0278811	0.0194683	0.0313746	0.0220325	0.024639
0.04	0.0291449	0.0278212	0.0233623	0.0423861	0.0360427	0.0255144	0.0409103	0.0289386	0.0321137
0.05	0.0353667	0.033841	0.0281093	0.0509054	0.0439388	0.0312929	0.0496961	0.0356292	0.0390055
0.06	0.0409928	0.0399271	0.0325019	0.0586913	0.051291	0.0367104	0.0577416	0.0419522	0.0454919
0.07	0.0461997	0.0456886	0.0366111	0.0659127	0.0582869	0.0418271	0.0653837	0.0479554	0.0515084
0.08	0.0510137	0.0513968	0.0405336	0.0723752	0.0648645	0.0466314	0.07243	0.0537247	0.0572207
0.09	0.0551764	0.0565841	0.0438156	0.0779744	0.0707806	0.0510261	0.078813	0.0589933	0.0622782
0.1	0.0587088	0.0611204	0.0467336	0.0826909	0.0761421	0.0549429	0.0844481	0.0637866	0.0665876
0.11	0.0616798	0.0652509	0.0490285	0.0865634	0.0810499	0.0584032	0.0892701	0.0681139	0.0703841
0.12	0.0641118	0.0687631	0.0509195	0.0897212	0.0852977	0.0614187	0.093587	0.0719552	0.0735325
0.13	0.066083	0.0719334	0.0523249	0.0922792	0.0889395	0.0640215	0.0972199	0.0753675	0.0761015
0.14	0.0676659	0.074764	0.0534949	0.0941878	0.0920836	0.0662487	0.100358	0.078344	0.0783697
0.15	0.0688158	0.0771875	0.05435	0.0956929	0.0947625	0.0681047	0.102961	0.0809054	0.0801118
0.16	0.0696241	0.0792596	0.054848	0.0966596	0.0969564	0.0695867	0.105105	0.0830518	0.0813852
0.17	0.0701084	0.0810882	0.0551593	0.0972388	0.098861	0.0707276	0.106806	0.0848015	0.0824655
0.18	0.0703445	0.0825932	0.0552848	0.0973917	0.100367	0.0715381	0.108059	0.0862003	0.083204
0.19	0.0703065	0.0837877	0.0551539	0.0972533	0.101485	0.0720607	0.108962	0.0872589	0.0836131
0.2	0.0700779	0.0847273	0.0548464	0.0968246	0.102401	0.0723258	0.109547	0.0879267	0.083856
0.21	0.0696275	0.0854157	0.0544445	0.0962011	0.102973	0.0723453	0.109859	0.0883022	0.0838553
0.22	0.0690126	0.0858885	0.0538584	0.0952495	0.10318	0.0721239	0.109975	0.088406	0.083568
0.23	0.0682433	0.0861635	0.0531753	0.0942358	0.103114	0.0716798	0.109747	0.0882281	0.0830903
0.24	0.067375	0.0862174	0.0523321	0.093051	0.102841	0.0710423	0.109261	0.0878137	0.0825098
0.25	0.0663821	0.0861992	0.051415	0.0917575	0.102378	0.0702282	0.108487	0.08716	0.081781
0.26	0.0652924	0.0859312	0.0504713	0.0903173	0.101663	0.0692487	0.107587	0.0863344	0.0809249
0.27	0.0640875	0.0855023	0.0494199	0.0887451	0.100819	0.0681378	0.106518	0.0853138	0.0799357
0.28	0.0627681	0.0848942	0.0483091	0.0871611	0.0997734	0.0668963	0.105326	0.0841429	0.0789528
0.29	0.0614015	0.0842275	0.047224	0.0854985	0.0986466	0.0655433	0.103969	0.0828111	0.0778825
0.3	0.0600064	0.0833816	0.0460979	0.0837619	0.0973413	0.0640862	0.102464	0.0813337	0.0767078
0.31	0.0585499	0.08247	0.0449102	0.0820167	0.0959246	0.0625509	0.100766	0.0797293	0.0754069
0.32	0.0570743	0.081525	0.0437866	0.0802676	0.0943691	0.0609408	0.0989683	0.078069	0.0740376
0.33	0.0555873	0.080444	0.0426055	0.0784337	0.0927695	0.0592854	0.0970651	0.0763128	0.0727
0.34	0.0540779	0.0792959	0.0414794	0.076591	0.0910988	0.0575774	0.0950885	0.0744725	0.0712882
0.35	0.0525839	0.0780301	0.0403881	0.0747588	0.0894462	0.0558412	0.0930921	0.072568	0.0699126
0.36	0.051079	0.0768158	0.0392243	0.072947	0.0877478	0.0540837	0.0909672	0.0706219	0.0685023
0.37	0.049578	0.0754946	0.0380478	0.071173	0.0859339	0.0523134	0.0888282	0.0686338	0.0671206
0.38	0.0480846	0.0741776	0.0367918	0.0693936	0.0841453	0.0505479	0.0865822	0.0666096	0.0657147
0.39	0.0465905	0.072751	0.0357071	0.0676894	0.0822161	0.0487864	0.0843203	0.0645776	0.064251
0.4	0.0451405	0.0713734	0.034588	0.0659559	0.0803335	0.0470474	0.082046	0.0625537	0.0627882
0.41	0.0437397	0.0699551	0.0334749	0.064308	0.0783989	0.0453269	0.0797561	0.060534	0.0613627
0.42	0.0423375	0.0684994	0.0323419	0.0626251	0.0765464	0.0436515	0.0774084	0.0585297	0.0599829
0.43	0.0409655	0.0669672	0.0313163	0.0609431	0.0746451	0.0420086	0.0751131	0.0565443	0.0586324
0.44	0.0396436	0.0654223	0.0302138	0.0593838	0.072651	0.040409	0.0728028	0.0545778	0.0572789
0.45	0.0383433	0.0639924	0.0292067	0.0578951	0.0707351	0.0388367	0.0704959	0.0526276	0.0558588
0.46	0.0370867	0.0624878	0.0281656	0.0563468	0.0687722	0.0373216	0.068204	0.0507059	0.054535
0.47	0.0358635	0.0609703	0.0271907	0.0549006	0.0669116	0.0358705	0.0659276	0.0488274	0.0532777
0.48	0.0346889	0.0594508	0.0262148	0.0534862	0.0650657	0.0344756	0.063673	0.0469907	0.0519631
0.49	0.0335631	0.058033	0.0252235	0.0520497	0.0632026	0.0331444	0.061437	0.0452257	0.0507002
0.5	0.0325136	0.0566034	0.0242942	0.0507193	0.0613781	0.0318691	0.0592194	0.0435078	0.0495448
0.51	0.0314847	0.0551994	0.0233066	0.0494599	0.0595025	0.0306515	0.0570902	0.0418209	0.048393
0.52	0.0305043	0.053798	0.0224433	0.0481843	0.0577377	0.02949	0.0549845	0.0401649	0.0471801
0.53	0.0295623	0.052436	0.0215576	0.0469135	0.0560453	0.0283907	0.0528839	0.0385875	0.0460299
0.54	0.028711	0.0510635	0.0207092	0.0456977	0.0543038	0.0273631	0.0508984	0.0370783	0.0449312
0.55	0.0278859	0.049733	0.0199034	0.044509	0.0526629	0.0264166	0.0489615	0.0356018	0.0438847
0.56	0.0270979	0.0483803	0.0191593	0.0433117	0.0509744	0.0255228	0.0470502	0.0341863	0.0428448
0.57	0.0263426	0.0471206	0.0184092	0.0422066	0.0494182	0.0246991	0.0451947	0.0328247	0.0417987
0.58	0.0256346	0.0458858	0.0176843	0.0411274	0.0478414	0.0239211	0.0434562	0.0315224	0.0408528
0.59	0.0249587	0.0446162	0.0168944	0.0400961	0.0463238	0.0232036	0.0417374	0.0302869	0.0399025
0.6	0.0243146	0.0434381	0.016159	0.0390477	0.0448584	0.0225457	0.0400551	0.0290824	0.0389077
0.61	0.0236964	0.0422504	0.0154549	0.0380558	0.0433604	0.021956	0.0384299	0.0279362	0.0379156
0.62	0.0230925	0.0411468	0.0147668	0.0370854	0.0419994	0.0214158	0.0368766	0.0268491	0.0369709
0.63	0.0225305	0.0400291	0.0140462	0.0361011	0.0406724	0.0209244	0.0353364	0.0257979	0.0360024
0.64	0.0219811	0.0389324	0.0133528	0.0351499	0.0393594	0.0204734	0.033805	0.0247922	0.0351383
0.65	0.0214616	0.0379132	0.0126726	0.0342663	0.0380413	0.0200693	0.0322895	0.0238368	0.034283
0.66	0.0209606	0.0368916	0.0120301	0.0333936	0.0367498	0.0197051	0.0308228	0.0229106	0.0333969
0.67	0.0204686	0.0358822	0.0114543	0.0325204	0.0355343	0.0193817	0.0293825	0.0220457	0.0325827
0.68	0.0200002	0.0349009	0.0108155	0.0315812	0.0343726	0.0190888	0.0279546	0.021203	0.0317807
0.69	0.0195448	0.0339272	0.0102144	0.0307219	0.0332081	0.0188245	0.026586	0.0203977	0.0309636
0.7	0.0191025	0.0330532	0.00963855	0.0298876	0.0320506	0.0185827	0.0252237	0.0196285	0.0300975
0.71	0.0186701	0.0321526	0.00903025	0.0290253	0.0309697	0.018365	0.0238838	0.0188879	0.0293262
0.72	0.0182767	0.031285	0.00845558	0.0281993	0.0299081	0.0181598	0.0225558	0.0181715	0.0285324
0.73	0.0179199	0.0304353	0.0078782	0.0274125	0.0288458	0.0179794	0.0212032	0.0174846	0.0277823
0.74	0.0175491	0.0295899	0.0073573	0.0265746	0.027808	0.0178135	0.0198834	0.0168208	0.0271013
0.75	0.0172087	0.0287894	0.00678742	0.0258082	0.0268189	0.0176507	0.0186686	0.0161655	0.0264132
0.76	0.0168704	0.0279939	0.0061944	0.0250339	0.0257973	0.017509	0.0174378	0.0155206	0.0257328
0.77	0.016531	0.0271968	0.0056482	0.0242816	0.0248923	0.0173722	0.0162395	0.014906	0.0250459
0.78	0.0162221	0.0264058	0.00510518	0.0235272	0.023957	0.0172352	0.015004	0.0143445	0.0243249
0.79	0.0159139	0.0257078	0.00459256	0.0227898	0.0230662	0.017101	0.0138288	0.0137844	0.023648
0.8	0.015624	0.0250108	0.00410086	0.0220741	0.0221659	0.0169743	0.0126862	0.0132416	0.0230109
0.81	0.0153514	0.0243533	0.00356403	0.0213378	0.0212211	0.0168446	0.0115239	0.0127107	0.022391
0.82	0.0150802	0.0236529	0.00302366	0.0206559	0.0203077	0.0167233	0.010428	0.0122005	0.0217346
0.83	0.0148525	0.0229613	0.00253283	0.019964	0.0194119	0.0165983	0.00930617	0.0116875	0.0210927
0.84	0.0145939	0.0222934	0.00207615	0.0192937	0.0185351	0.0164721	0.00821735	0.0112171	0.0205007
0.85	0.0143514	0.0216539	0.00160016	0.0186486	0.0177012	0.0163439	0.00708798	0.0107364	0.0198611
0.86	0.0141172	0.0210609	0.00108652	0.0180605	0.0169003	0.016212	0.00599396	0.0102738	0.0191863
0.87	0.0138889	0.0204225	0.00057006	0.0174429	0.0160633	0.016089	0.00492304	0.00982592	0.018594
0.88	0.0136634	0.0197715	7.24772e-05	0.01685	0.0152472	0.0159759	0.00387914	0.00937362	0.0180405
0.89	0.0134257	0.0191755	-0.000365981	0.0163015	0.014468	0.0158597	0.00284435	0.00893346	0.0174302
0.9	0.0132011	0.0185808	-0.000791845	0.0157793	0.0136716	0.0157435	0.00178519	0.00849935	0.0168119
0.91	0.0129752	0.0179759	-0.00122762	0.0152785	0.0128412	0.0156239	0.00073517	0.00807416	0.0162473
0.92	0.0127637	0.0173917	-0.00165721	0.0148043	0.0120477	0.0155053	-0.000295874	0.00766599	0.0156511
0.93	0.0125463	0.016764	-0.00211497	0.0143086	0.0112521	0.0153866	-0.00128448	0.00723705	0.0150619
0.94	0.0123326	0.0161739	-0.00252871	0.0138162	0.0104672	0.0152687	-0.00230313	0.00682911	0.0144986
0.95	0.0121318	0.015599	-0.00300567	0.0133227	0.00976612	0.0151538	-0.00330977	0.00643394	0.0139462
0.96	0.0119215	0.0150037	-0.00344137	0.0128544	0.0089976	0.0150378	-0.00427565	0.00603089	0.0134081
0.97	0.0116951	0.0144275	-0.00389879	0.0124611	0.0082647	0.0149131	-0.00525665	0.00564578	0.0127979
0.98	0.0114943	0.0138089	-0.00434175	0.0120393	0.00753083	0.0147868	-0.00622704	0.0052364	0.0122258
0.99	0.0112981	0.0131395	-0.00473608	0.0116143	0.00683899	0.0146425	-0.00720716	0.0048355	0.0116275

## Sheet: PI(4,5)P2_after
	cell#1	cell#2	cell#3	cell#4	cell#5	cell#6	cell#7	cell#8	cell#9
0.01	0.00125846	0.00615421	0.00617427	0.00564835	0.00669572	0.0027336	0.00362458	0.00354758	0.001868
0.02	0.00246062	0.0122322	0.0124255	0.0113178	0.0133845	0.00540141	0.00700783	0.00695458	0.00375454
0.03	0.00360478	0.0178733	0.0183411	0.0164964	0.0198238	0.00803625	0.0102988	0.0102922	0.00553
0.04	0.00476219	0.0229582	0.0238574	0.0211544	0.0260264	0.0104254	0.0134732	0.0134068	0.00726377
0.05	0.00585982	0.027726	0.0289545	0.0255237	0.0319675	0.0126878	0.0165059	0.0163005	0.00895437
0.06	0.00692855	0.031992	0.0337564	0.0295194	0.0375224	0.0148766	0.0193527	0.0190405	0.0105906
0.07	0.00800088	0.0359737	0.0383963	0.0332233	0.0429024	0.0170594	0.0221326	0.021677	0.0122369
0.08	0.00909729	0.0397133	0.0429123	0.0369296	0.0482218	0.0192959	0.0247892	0.0242231	0.0138857
0.09	0.0100689	0.0429506	0.046846	0.0399194	0.0529041	0.0212634	0.0271477	0.0264468	0.0153919
0.1	0.0109252	0.0455144	0.0503884	0.042552	0.0572375	0.0229574	0.0291942	0.0284032	0.0167451
0.11	0.011692	0.0475525	0.0533982	0.0446422	0.0611759	0.0244487	0.0309183	0.0301212	0.0179799
0.12	0.0123777	0.0491069	0.0558619	0.0462879	0.0646385	0.0256837	0.0324312	0.0315163	0.0190811
0.13	0.0129606	0.0502898	0.0579828	0.0475763	0.0676625	0.0267268	0.0336579	0.032658	0.0200828
0.14	0.013495	0.0510976	0.0598695	0.0485419	0.0704513	0.0276029	0.0347088	0.0336169	0.0210009
0.15	0.0139269	0.051652	0.0612741	0.049139	0.0727241	0.0283322	0.0355179	0.0343499	0.0218026
0.16	0.0142735	0.051868	0.0624389	0.0495157	0.0747412	0.0288953	0.0361648	0.0348523	0.0224822
0.17	0.0145548	0.0519591	0.0632908	0.0495875	0.0763356	0.0293446	0.0366249	0.0352158	0.0230406
0.18	0.0147416	0.0518039	0.0638628	0.0495324	0.077714	0.0296184	0.0369336	0.0354534	0.0234819
0.19	0.0148807	0.0514854	0.0642932	0.0492966	0.0787657	0.0298219	0.0370603	0.0355524	0.023841
0.2	0.0149401	0.0508956	0.0644884	0.0489331	0.0795569	0.0299338	0.0370677	0.0355574	0.0241132
0.21	0.0149513	0.0502707	0.0645381	0.0484189	0.0801645	0.0299414	0.036957	0.035414	0.0243038
0.22	0.0149095	0.04954	0.0644025	0.0477724	0.0805115	0.0298744	0.0367165	0.0352149	0.0244056
0.23	0.0148109	0.0487672	0.0641531	0.0470824	0.0806704	0.0297352	0.0363991	0.0349226	0.024414
0.24	0.0146736	0.0479255	0.0637019	0.0462373	0.0806383	0.0295167	0.0360309	0.0345548	0.0243379
0.25	0.014483	0.0469076	0.0631597	0.0453577	0.0804183	0.0292436	0.0355229	0.0341278	0.0241735
0.26	0.0142512	0.0459417	0.0624919	0.044311	0.079972	0.028931	0.0349591	0.0336135	0.0239544
0.27	0.0139816	0.0449316	0.061768	0.0432049	0.0794506	0.0285616	0.0343303	0.0330764	0.0236967
0.28	0.013687	0.0438987	0.0608835	0.0421435	0.0787559	0.0281971	0.0336821	0.0324418	0.0233805
0.29	0.0133718	0.0428019	0.0600475	0.0410228	0.0779218	0.0277623	0.0329874	0.0318092	0.0230053
0.3	0.0130069	0.0416525	0.058988	0.039886	0.0769974	0.0272818	0.0322554	0.0311458	0.0225776
0.31	0.0126329	0.0405585	0.0580023	0.0387836	0.0759859	0.0268081	0.0314707	0.0304484	0.0221018
0.32	0.0122395	0.0394709	0.0569815	0.03759	0.0749077	0.0263064	0.0306869	0.0296903	0.0215822
0.33	0.011835	0.0383404	0.0558788	0.0364089	0.0737367	0.0257418	0.0298548	0.0289963	0.0210387
0.34	0.0114268	0.0372457	0.0547702	0.0352018	0.072479	0.0252049	0.0290256	0.0282657	0.0204886
0.35	0.0109969	0.0362143	0.0536279	0.034036	0.071146	0.0246831	0.0281896	0.027521	0.0199213
0.36	0.0105679	0.0351271	0.0523867	0.0328618	0.0697889	0.024124	0.0273152	0.0267678	0.0193293
0.37	0.0101345	0.0340401	0.0511416	0.0317208	0.0683504	0.0235501	0.0264756	0.0260063	0.0187054
0.38	0.00970593	0.0330013	0.0499829	0.0305872	0.0668962	0.0229392	0.0256515	0.0252513	0.0180764
0.39	0.00928042	0.0319812	0.0487977	0.0295111	0.0653589	0.0223583	0.0248121	0.0245177	0.0174394
0.4	0.00884972	0.030997	0.0475993	0.0284287	0.0638655	0.0217738	0.0239763	0.0238035	0.0168022
0.41	0.00843943	0.0300173	0.0464154	0.0273609	0.0623243	0.0212272	0.0231781	0.0230804	0.0161786
0.42	0.00802474	0.0291235	0.0452555	0.0262988	0.0607636	0.020653	0.0224171	0.022366	0.015559
0.43	0.00762902	0.0282067	0.0440507	0.0252744	0.0592626	0.0201143	0.0216523	0.0216972	0.0149382
0.44	0.00724483	0.0273444	0.042901	0.024299	0.0577431	0.0195693	0.0208969	0.0210292	0.0143192
0.45	0.00687354	0.0264796	0.0417408	0.0233291	0.0562473	0.0190471	0.0201782	0.0203539	0.013718
0.46	0.00650485	0.0256824	0.0405912	0.0223871	0.0547392	0.0185649	0.0194873	0.0197127	0.013119
0.47	0.00617024	0.02488	0.0394475	0.0215005	0.0532164	0.0180704	0.0188117	0.0190972	0.0125551
0.48	0.00584652	0.0241622	0.0383565	0.0206761	0.0517275	0.0175912	0.0181663	0.0185029	0.0120105
0.49	0.00553775	0.0234687	0.0372674	0.0199231	0.0503071	0.0171348	0.0175575	0.0179428	0.0114846
0.5	0.00523487	0.0227886	0.0362551	0.0191533	0.0489093	0.0167187	0.0169818	0.0174007	0.0109671
0.51	0.00495778	0.0221701	0.0353206	0.0183831	0.0474642	0.0162999	0.0164349	0.016846	0.0104586
0.52	0.00468802	0.0215781	0.0343544	0.0176423	0.0460853	0.0159026	0.0158936	0.0163396	0.00996326
0.53	0.00443474	0.0209749	0.0333986	0.0169517	0.0447027	0.0155066	0.0153937	0.0158453	0.00949583
0.54	0.00420558	0.0204683	0.0325021	0.0163045	0.043356	0.01514	0.0149111	0.0153592	0.00905962
0.55	0.00398603	0.0200065	0.0316304	0.0157018	0.0420343	0.0147913	0.0144684	0.0149217	0.00865302
0.56	0.00378056	0.0195777	0.0308117	0.0151307	0.0407402	0.0144325	0.0140327	0.0145137	0.00825696
0.57	0.00357588	0.0191678	0.0299859	0.0145695	0.0395032	0.014092	0.0136268	0.0140962	0.00787123
0.58	0.00338433	0.0187676	0.0292084	0.0140619	0.0382507	0.0137789	0.0132415	0.0136996	0.00750034
0.59	0.00320652	0.0184272	0.0284619	0.0136083	0.0370086	0.0134686	0.0128842	0.0133176	0.00714892
0.6	0.00304334	0.018013	0.0277445	0.0131826	0.0358471	0.0131669	0.0125595	0.0129758	0.00681532
0.61	0.00288725	0.0176817	0.0270739	0.0127384	0.0346967	0.012887	0.0122356	0.0126323	0.00651288
0.62	0.00273121	0.0173688	0.0263587	0.0123528	0.0335786	0.0126215	0.0119349	0.0123386	0.00622716
0.63	0.00258324	0.0171295	0.0257084	0.0119824	0.032486	0.0123562	0.0116515	0.0120449	0.00594803
0.64	0.00243882	0.0168284	0.0250309	0.0116058	0.0314012	0.0120799	0.0113841	0.0117455	0.00567247
0.65	0.00230492	0.0165307	0.0244036	0.0112261	0.0303361	0.0118323	0.0111024	0.0114627	0.00540501
0.66	0.00216463	0.0162944	0.0237617	0.0108557	0.029295	0.0115644	0.010865	0.0111697	0.00515075
0.67	0.00202988	0.016031	0.023143	0.0105563	0.028263	0.0113069	0.0106234	0.0108928	0.00491804
0.68	0.0019012	0.0157975	0.0225738	0.0102275	0.0272605	0.0110815	0.0103861	0.0106431	0.00470711
0.69	0.00177618	0.0155576	0.0219624	0.00988858	0.0263174	0.0108502	0.0101624	0.0104152	0.00450486
0.7	0.00164361	0.0153647	0.0214135	0.00962359	0.0253757	0.0106301	0.00994365	0.010176	0.00430189
0.71	0.00151645	0.0151214	0.0208295	0.009306	0.0244354	0.0104077	0.00971772	0.00992725	0.00410039
0.72	0.00138241	0.0148646	0.0202743	0.00899411	0.0235156	0.0101916	0.00949559	0.00966362	0.00390229
0.73	0.00125145	0.0146405	0.0197553	0.00866612	0.0225417	0.0100119	0.00926513	0.00941663	0.00371958
0.74	0.00112108	0.0144082	0.0192248	0.00840315	0.0216001	0.00980245	0.00904875	0.00920135	0.00354755
0.75	0.000992537	0.0141488	0.0187655	0.00814091	0.0206875	0.00963329	0.00886407	0.00898132	0.00339327
0.76	0.000861421	0.0138877	0.0182897	0.00785672	0.0198071	0.00944241	0.00865923	0.00875723	0.00324107
0.77	0.000731779	0.0136276	0.0177977	0.0075933	0.0189242	0.00926385	0.00845011	0.00853815	0.0030856
0.78	0.000595125	0.0133971	0.0172956	0.00733973	0.0180947	0.00907925	0.00825662	0.00830114	0.00293173
0.79	0.000460035	0.0131631	0.0168155	0.00705345	0.0172714	0.00890815	0.0080593	0.00806748	0.00277935
0.8	0.000325618	0.0129433	0.01636	0.00681031	0.0164276	0.00870783	0.00786753	0.00783015	0.00263351
0.81	0.000199133	0.0126895	0.0158798	0.00655053	0.015622	0.00855696	0.00767612	0.00761161	0.00249952
0.82	7.44204e-05	0.0124682	0.0154318	0.00631803	0.0148107	0.00840824	0.00749084	0.00740121	0.00237658
0.83	-5.19485e-05	0.0122413	0.0149863	0.00607552	0.0140222	0.00825289	0.0073054	0.00716688	0.00225119
0.84	-0.000179267	0.0120357	0.0145634	0.00582823	0.0132743	0.00809845	0.00711148	0.0069253	0.00211976
0.85	-0.000308412	0.0118151	0.0141443	0.00559479	0.0125115	0.00794449	0.00692181	0.00668153	0.00198945
0.86	-0.000431901	0.0116195	0.0136984	0.00539592	0.01173	0.00779034	0.00674326	0.006449	0.00186328
0.87	-0.000554113	0.0114385	0.0132551	0.0051772	0.0109812	0.00762325	0.00655453	0.0062142	0.00174765
0.88	-0.000670079	0.0112607	0.0128288	0.00494667	0.0102005	0.00749248	0.00638499	0.00600723	0.00164611
0.89	-0.00078558	0.011091	0.0124073	0.00471312	0.00945501	0.00736859	0.00621611	0.00577832	0.0015424
0.9	-0.000893744	0.0109364	0.0120388	0.00446913	0.00870205	0.00721735	0.00604037	0.00555445	0.00143894
0.91	-0.00101075	0.0107431	0.0116734	0.00428481	0.00794928	0.00706757	0.0058671	0.005311	0.00133191
0.92	-0.0011266	0.0106055	0.0112664	0.00406446	0.00721652	0.00690174	0.00569864	0.005086	0.00122227
0.93	-0.00123037	0.0104464	0.010879	0.00387902	0.00647967	0.0067443	0.00551946	0.00487221	0.00112014
0.94	-0.00133886	0.0103332	0.0105233	0.00368397	0.00578723	0.00660926	0.00535911	0.00463866	0.00102384
0.95	-0.00143595	0.0102018	0.0101139	0.00350714	0.00506297	0.00647245	0.00518438	0.00441079	0.000939806
0.96	-0.0015297	0.0100441	0.00971482	0.00333468	0.0043453	0.00631564	0.005006	0.00420054	0.000850088
0.97	-0.00162207	0.00991752	0.00934183	0.00316222	0.00364174	0.00616728	0.00484099	0.00400312	0.000760096
0.98	-0.00171991	0.00977212	0.00896521	0.00296903	0.00293523	0.00599181	0.00465593	0.00378871	0.000669918
0.99	-0.00181724	0.00960584	0.0086113	0.00279177	0.00225917	0.00581976	0.00447447	0.00358566	0.000578329
