# Supplementary material for: Bilateral regulation of EGFR activity and local PI(4,5)P2 dynamics in mammalian cells observed with superresolution microscopy
Source: eLife journal article supplement (doi:10.7554/elife.101652), 2024-10-09
Supplement: fig2-data1 [file elife-101652-fig2-data1-v1.zip]

## Sheet: EGFR_PI(4,5)P2_before
	cell#1	cell#2	cell#3	cell#4	cell#5	cell#6	cell#7	cell#8
0.01	0.0009087	0.000334765	0.000443855	-0.000398081	0.000693696	0.000714704	0.000651796	0.000488131
0.02	0.00169943	0.00125014	0.0013429	0.0013284	0.00150589	0.0020261	0.00155158	0.00130815
0.03	0.00251466	0.00207874	0.00200878	0.00284726	0.00222519	0.00308123	0.0023026	0.00219136
0.04	0.00333608	0.00278929	0.00265796	0.00379557	0.00293621	0.00412911	0.00312161	0.00313549
0.05	0.00414577	0.00359242	0.00336401	0.00498632	0.00368955	0.00513383	0.00390505	0.00399178
0.06	0.00490434	0.00437751	0.00395572	0.00587049	0.00440613	0.00608321	0.00462812	0.00469347
0.07	0.00564997	0.00515094	0.00455743	0.00665875	0.00510979	0.00692992	0.00535833	0.00541825
0.08	0.00635786	0.00575226	0.00519592	0.00754683	0.00578682	0.00777266	0.00606334	0.0061385
0.09	0.00699545	0.00635586	0.00568161	0.00839569	0.00643952	0.00855734	0.00667518	0.00679581
0.1	0.0076218	0.00688528	0.00617963	0.00918428	0.00708954	0.00934324	0.00731196	0.00744768
0.11	0.00820079	0.00741295	0.00673411	0.00986744	0.0076902	0.0100314	0.00786772	0.00809614
0.12	0.00872953	0.00790789	0.0072227	0.0105319	0.00829629	0.0107089	0.00840034	0.00868204
0.13	0.00924482	0.00829832	0.00764408	0.0111223	0.00885307	0.0111992	0.00887787	0.00922607
0.14	0.00970569	0.0087627	0.00806521	0.0117364	0.00936413	0.0117186	0.00938177	0.00963489
0.15	0.0101045	0.00921912	0.00839011	0.0122311	0.00985498	0.0121309	0.00981219	0.00997368
0.16	0.0104739	0.00961495	0.00875072	0.0126437	0.0102835	0.0125056	0.010209	0.0103915
0.17	0.0108189	0.0100023	0.00912178	0.0128953	0.0107044	0.0128666	0.0105518	0.0106298
0.18	0.0110872	0.0103854	0.00941622	0.013245	0.0110886	0.013163	0.0108295	0.0109246
0.19	0.0113084	0.010756	0.00972667	0.0135061	0.0114459	0.0134424	0.0110828	0.0111444
0.2	0.0114748	0.011021	0.00995184	0.0136964	0.0117693	0.0137247	0.0112994	0.0113954
0.21	0.0116323	0.0112099	0.0102087	0.0139043	0.012063	0.0139088	0.0114445	0.0116145
0.22	0.0117377	0.011432	0.0104145	0.0140405	0.012344	0.0141233	0.0115802	0.01178
0.23	0.0118168	0.0116082	0.0105859	0.0139912	0.0125588	0.014257	0.01169	0.0119535
0.24	0.0118895	0.0117401	0.0106931	0.0139833	0.0127743	0.014331	0.0117683	0.0120389
0.25	0.0119153	0.011872	0.0107686	0.0140253	0.0129336	0.0144283	0.0117961	0.0121537
0.26	0.0119106	0.0119895	0.0108423	0.0140133	0.0130636	0.0144542	0.0118161	0.012211
0.27	0.0119007	0.0121059	0.0108743	0.0138759	0.0131754	0.0144899	0.0117971	0.0121963
0.28	0.0118597	0.0121338	0.0108739	0.0137333	0.0132667	0.014479	0.0117299	0.0122354
0.29	0.0117783	0.0121797	0.0108657	0.0136249	0.0133381	0.0143845	0.0116739	0.0122512
0.3	0.0117069	0.0122564	0.0108207	0.0136394	0.0133756	0.0143041	0.011611	0.012193
0.31	0.0116085	0.0122359	0.0107979	0.0135513	0.0133727	0.0142439	0.0115386	0.0121491
0.32	0.0114863	0.0122439	0.0108018	0.0134086	0.013355	0.0141087	0.0114283	0.0120844
0.33	0.0113488	0.0122253	0.0107127	0.0132397	0.0133262	0.0139475	0.011331	0.0120011
0.34	0.0112321	0.0121581	0.0106277	0.0130813	0.0132713	0.0137886	0.0111941	0.0118857
0.35	0.0110902	0.0121472	0.0105476	0.0128262	0.0132048	0.0136145	0.0110426	0.0117845
0.36	0.0109255	0.0121035	0.0104742	0.0126383	0.0131121	0.0134069	0.0109005	0.0116723
0.37	0.0107448	0.0119916	0.0103824	0.0124164	0.0130104	0.0132198	0.010717	0.0115711
0.38	0.0105573	0.01193	0.0102936	0.0121714	0.0128921	0.0129992	0.0105473	0.011399
0.39	0.0103914	0.0118342	0.0102075	0.0119827	0.0127573	0.0127934	0.0103629	0.0112932
0.4	0.010218	0.0117301	0.0100746	0.0117614	0.0126081	0.0125923	0.010178	0.0111648
0.41	0.0100427	0.0115901	0.00992833	0.0115084	0.0124652	0.0123747	0.00999887	0.0109996
0.42	0.00986133	0.0114529	0.00979824	0.0113643	0.0123055	0.0121794	0.00979472	0.0108697
0.43	0.00969448	0.0113141	0.00966535	0.0110617	0.0121388	0.0119583	0.0096213	0.0107246
0.44	0.00950264	0.0111836	0.00951833	0.0108	0.0119658	0.0117347	0.00944651	0.0105973
0.45	0.00932079	0.0110321	0.00935847	0.0106411	0.0118099	0.0115432	0.00927891	0.0104867
0.46	0.00913554	0.0108767	0.00919592	0.0104096	0.0116313	0.0113203	0.00910953	0.0103334
0.47	0.00894602	0.0107242	0.00907701	0.0102018	0.011482	0.0111438	0.00894527	0.0102053
0.48	0.00877282	0.0105667	0.00893305	0.00997674	0.0113104	0.0109699	0.00877733	0.0100783
0.49	0.00859983	0.0104234	0.00879713	0.00971759	0.0111433	0.0107594	0.0086147	0.00994918
0.5	0.00841915	0.0103059	0.00866005	0.00954857	0.0109678	0.010561	0.00843463	0.00984506
0.51	0.00825886	0.0101209	0.008536	0.00942169	0.010789	0.0103703	0.00828996	0.00980969
0.52	0.00808403	0.00999561	0.00836483	0.00923849	0.0106197	0.0102091	0.00815436	0.00971059
0.53	0.00791992	0.00986813	0.00820827	0.00906531	0.010474	0.0100144	0.00801257	0.00960229
0.54	0.00776797	0.00967441	0.00804192	0.00892904	0.0103117	0.00984444	0.00787267	0.00950499
0.55	0.00761338	0.00947785	0.00788916	0.00879626	0.0101512	0.00968727	0.00774382	0.00940502
0.56	0.00748624	0.00935785	0.00774815	0.00858943	0.0100073	0.00954897	0.00762729	0.0092829
0.57	0.0073498	0.0092022	0.0075668	0.00843111	0.00986548	0.00937439	0.00753274	0.009203
0.58	0.00722254	0.00904175	0.00739506	0.00824897	0.00973151	0.00923633	0.0074219	0.00911192
0.59	0.00709992	0.00892169	0.00726299	0.00812377	0.00958515	0.00912061	0.00731446	0.00901902
0.6	0.00697586	0.00879415	0.00711639	0.00804679	0.00945898	0.00898402	0.00723406	0.00892538
0.61	0.00687115	0.00867288	0.00698175	0.00786795	0.00931706	0.00887056	0.00716122	0.00882929
0.62	0.00677517	0.00851228	0.00682071	0.00772633	0.00919461	0.00879279	0.00709186	0.00870414
0.63	0.00667752	0.00839068	0.0067108	0.00766548	0.00907719	0.00870759	0.00701991	0.00856433
0.64	0.00658649	0.00830758	0.00656703	0.00756104	0.00895983	0.00860542	0.00697256	0.00843539
0.65	0.00649978	0.00822504	0.00645052	0.00739303	0.00884425	0.00854391	0.00690749	0.00831759
0.66	0.00643127	0.00808689	0.00633156	0.00736444	0.00871897	0.00845148	0.00685157	0.00818221
0.67	0.00634804	0.00798838	0.00621776	0.00731131	0.00859587	0.008343	0.00682351	0.00804703
0.68	0.00627159	0.00787643	0.00609893	0.00723285	0.0084759	0.00823592	0.00678487	0.00794454
0.69	0.00620606	0.00778317	0.00597759	0.00712376	0.00836276	0.00813326	0.0067344	0.00781018
0.7	0.00615583	0.00766331	0.00590092	0.00705077	0.00826062	0.00805436	0.0066934	0.00769259
0.71	0.00609508	0.00753821	0.00579662	0.00692447	0.00815804	0.00794248	0.00663945	0.00760023
0.72	0.0060515	0.00744572	0.00567365	0.00691117	0.00805971	0.00782818	0.0066163	0.00748061
0.73	0.00599931	0.00733929	0.00556852	0.00683112	0.00795421	0.00769169	0.00657954	0.00735058
0.74	0.00596719	0.00728018	0.00545557	0.00675928	0.00784991	0.00753422	0.00653869	0.0072735
0.75	0.005924	0.00716667	0.00536478	0.00669814	0.00775336	0.00744057	0.00650942	0.00717941
0.76	0.00589797	0.00711798	0.00528694	0.00664766	0.00764438	0.00731034	0.00647909	0.0071227
0.77	0.00587253	0.00703174	0.00519871	0.0065921	0.00754773	0.00719509	0.00645527	0.00702471
0.78	0.00584395	0.0069578	0.00512515	0.0065423	0.00745301	0.00706424	0.00642716	0.00691647
0.79	0.00582909	0.00689164	0.00504644	0.00640394	0.00736488	0.00693806	0.00639754	0.00681498
0.8	0.00581158	0.00683189	0.00498652	0.00638952	0.0072776	0.0067985	0.00637105	0.00672338
0.81	0.0057981	0.00678175	0.0049244	0.00633322	0.00719321	0.00664781	0.00634627	0.00663387
0.82	0.00578175	0.00670288	0.0048712	0.00619581	0.00709375	0.00652217	0.00630268	0.00654535
0.83	0.00576256	0.00664312	0.00484674	0.00611974	0.0070007	0.00640145	0.00627927	0.0064679
0.84	0.00573993	0.00658166	0.0048181	0.00602697	0.0069137	0.00623316	0.00624368	0.00639744
0.85	0.00572651	0.00651691	0.00478229	0.00599058	0.00681512	0.00610374	0.00619733	0.00632949
0.86	0.00572445	0.00642911	0.00474377	0.00597725	0.00672807	0.0059911	0.00614386	0.00626603
0.87	0.00571074	0.00632836	0.00475606	0.0059702	0.00663095	0.00583132	0.00607873	0.00620394
0.88	0.00569611	0.00626016	0.00471958	0.00594201	0.0065441	0.00567699	0.00603655	0.00611944
0.89	0.00567776	0.00619492	0.0047153	0.00586152	0.00645076	0.00554666	0.00598441	0.00605584
0.9	0.00566867	0.00612213	0.00469528	0.00579486	0.00634783	0.00542545	0.00595424	0.00595803
0.91	0.0056595	0.00603371	0.00466814	0.0057522	0.00624246	0.00529809	0.00588765	0.00584381
0.92	0.00566134	0.00594575	0.00466474	0.00568912	0.00614357	0.00514679	0.00581164	0.00576148
0.93	0.00564678	0.00588682	0.0046477	0.00560431	0.00605458	0.00503368	0.00574892	0.00572475
0.94	0.00563432	0.00581454	0.00464709	0.00556654	0.0059521	0.00493189	0.00568971	0.00564871
0.95	0.00562307	0.00575334	0.0046412	0.00542895	0.00586324	0.00483006	0.0056317	0.0055976
0.96	0.00561431	0.00569166	0.00464266	0.00533921	0.00576426	0.00473931	0.00556497	0.00553767
0.97	0.00560389	0.00561021	0.00463505	0.00523402	0.00565495	0.00463902	0.00550127	0.0054808
0.98	0.00559303	0.00550245	0.00462175	0.00513971	0.00555166	0.00455696	0.00544122	0.00539862
0.99	0.00557681	0.00539469	0.00460486	0.0050694	0.00544369	0.00451247	0.00536485	0.00534317

## Sheet: EGFR_PI(4,5)P2_after
	cell#1	cell#2	cell#3	cell#4	cell#5	cell#6	cell#7	cell#8
0.01	4.48197e-05	0.000361895	0.000126689	0.000300854	0.000526737	0.000242732	0.00032686	0.000166772
0.02	0.000467553	0.000635555	0.000957536	0.00108614	0.00101354	0.000795834	0.000721091	0.000913064
0.03	0.000889263	0.00100779	0.00136441	0.00174021	0.00164426	0.00127055	0.00093325	0.00126997
0.04	0.00142068	0.00130421	0.00163931	0.00228491	0.00218473	0.00172024	0.0012335	0.00165555
0.05	0.00185453	0.00165816	0.0020634	0.0027255	0.00266233	0.00217274	0.00144053	0.00207714
0.06	0.00223414	0.00200187	0.00241503	0.0031788	0.00322837	0.00259128	0.00171804	0.00245461
0.07	0.00254974	0.00231332	0.00273654	0.00365982	0.0037611	0.00298386	0.0020507	0.00276065
0.08	0.00282936	0.00263882	0.00306618	0.00412439	0.00419971	0.00339432	0.00223897	0.00313197
0.09	0.00305941	0.00293832	0.00348376	0.00458899	0.00458557	0.00375055	0.00247368	0.00341922
0.1	0.0033881	0.00321429	0.00384783	0.00495831	0.00498917	0.00413274	0.00272707	0.00377686
0.11	0.00352297	0.00350824	0.0041457	0.00528404	0.00531998	0.00447856	0.0029608	0.00404529
0.12	0.00370568	0.00376319	0.00443264	0.00565614	0.00557716	0.00481371	0.00321619	0.00430215
0.13	0.00391027	0.00400382	0.00478195	0.00598833	0.00587479	0.00515469	0.00344749	0.00446373
0.14	0.00408137	0.00423697	0.0050177	0.00619453	0.00614102	0.00542531	0.00365167	0.00471864
0.15	0.00415067	0.0044562	0.00533047	0.00653071	0.00639263	0.00570245	0.00386128	0.0048711
0.16	0.00423618	0.00465261	0.00556269	0.00679388	0.00657521	0.00592828	0.00402722	0.00501436
0.17	0.0042738	0.00483371	0.00576481	0.00705111	0.00676409	0.00620042	0.00416066	0.00516484
0.18	0.00429263	0.00500949	0.00593997	0.00724232	0.00692568	0.00644802	0.00432092	0.00521691
0.19	0.00425454	0.00516986	0.00611383	0.00737272	0.00705637	0.00665029	0.00448289	0.00527505
0.2	0.00427669	0.00531111	0.00626375	0.00756707	0.00713478	0.0068685	0.00465331	0.00534579
0.21	0.00427894	0.0054324	0.00638937	0.00771303	0.00719007	0.00700131	0.00484665	0.00533615
0.22	0.00427539	0.00554217	0.00653268	0.0078858	0.00730434	0.00715281	0.00495332	0.00543462
0.23	0.00424185	0.00564039	0.00663575	0.00800632	0.00734259	0.00723947	0.00506365	0.00549915
0.24	0.00421109	0.00571869	0.00674831	0.00820495	0.00742856	0.00733597	0.00521424	0.00553755
0.25	0.0042014	0.0057908	0.006878	0.00831627	0.00744248	0.00737107	0.00537555	0.00557567
0.26	0.00415958	0.00584944	0.00693068	0.00839526	0.00746113	0.00739293	0.00547876	0.00558857
0.27	0.00412853	0.00589623	0.0069969	0.00848857	0.00746342	0.00739648	0.00561307	0.00555633
0.28	0.00404741	0.00593248	0.00700097	0.00857075	0.0074597	0.00741393	0.00572964	0.00557576
0.29	0.00394688	0.00593981	0.0070273	0.00862174	0.00743339	0.00747482	0.00580514	0.00554322
0.3	0.00389392	0.00594245	0.0070508	0.00865572	0.00740999	0.00750136	0.00590215	0.00555774
0.31	0.00378505	0.00592348	0.00702527	0.00862899	0.00738169	0.00754179	0.00595476	0.00554437
0.32	0.00371786	0.00590406	0.00702932	0.00858479	0.00736626	0.00750623	0.00600562	0.00553804
0.33	0.0036888	0.00587988	0.0070353	0.00854322	0.00734057	0.00750894	0.00607735	0.00543468
0.34	0.00366594	0.00584321	0.00697375	0.00847099	0.00725878	0.00752274	0.00611237	0.00536219
0.35	0.00361077	0.00578217	0.00695324	0.00837541	0.0071814	0.00750527	0.0061298	0.00532826
0.36	0.00357124	0.00571971	0.00692355	0.00827251	0.00709661	0.00748292	0.00613596	0.00523053
0.37	0.00338542	0.00564482	0.00688551	0.00816538	0.00700709	0.00746836	0.00616611	0.00520835
0.38	0.00325614	0.00556742	0.00681602	0.00804028	0.00690732	0.00742467	0.00619051	0.00514582
0.39	0.00323016	0.00548737	0.00673342	0.00795586	0.00682061	0.00739109	0.00617123	0.00503529
0.4	0.00317179	0.00538815	0.00665027	0.00784648	0.00672416	0.00733616	0.00615628	0.0050074
0.41	0.00310251	0.00528671	0.00653602	0.00776607	0.00664192	0.00725728	0.00612191	0.00492922
0.42	0.00301281	0.00518021	0.00648618	0.00768294	0.00654048	0.00721677	0.00611021	0.00486885
0.43	0.00294806	0.00509229	0.00639814	0.00761919	0.0064299	0.00712802	0.00610834	0.00478824
0.44	0.00294358	0.00498647	0.00632008	0.00753927	0.0063226	0.00707513	0.00612744	0.00469787
0.45	0.00288564	0.00488166	0.00626149	0.0074566	0.00622936	0.00703942	0.00611966	0.00461894
0.46	0.00286113	0.00477402	0.0061517	0.00734754	0.00611752	0.00696754	0.00611081	0.00454652
0.47	0.00285494	0.00466663	0.00606994	0.00725656	0.00598858	0.00689843	0.00609513	0.00448826
0.48	0.0028229	0.0045568	0.00598949	0.00716811	0.00586547	0.00681672	0.00610431	0.0044404
0.49	0.00280004	0.00444599	0.00594	0.00705444	0.00575061	0.00671632	0.00608316	0.00436843
0.5	0.00278078	0.00433721	0.00586468	0.00696489	0.00564256	0.0066383	0.0060601	0.00430118
0.51	0.00277805	0.00422811	0.00581171	0.00684019	0.00553351	0.00648259	0.00602638	0.00427862
0.52	0.00275929	0.0041126	0.00577374	0.00672845	0.00542078	0.00636311	0.00599803	0.00422456
0.53	0.0027436	0.00402348	0.00570689	0.00664951	0.00533085	0.0062827	0.00599537	0.00422479
0.54	0.00273581	0.00392278	0.00564293	0.00653747	0.00521867	0.00619966	0.00593754	0.0041784
0.55	0.00273129	0.00383742	0.00559903	0.00642175	0.00511604	0.00613019	0.0059219	0.00413032
0.56	0.00270887	0.00373811	0.0055248	0.00628333	0.00504144	0.00604015	0.00588674	0.00410759
0.57	0.00268003	0.00366356	0.00544067	0.00619573	0.00496417	0.00594586	0.00584039	0.00404422
0.58	0.00266877	0.0035888	0.00537493	0.00610701	0.00488264	0.00585096	0.00580178	0.0039382
0.59	0.00262956	0.00350285	0.00533045	0.00602018	0.00480043	0.00574017	0.00575735	0.00384482
0.6	0.00262766	0.00342892	0.00527236	0.0059677	0.00470502	0.0056715	0.00570459	0.00379178
0.61	0.0025479	0.00335575	0.00521246	0.00588391	0.00461625	0.00558155	0.00567276	0.00370608
0.62	0.00249244	0.0032881	0.00517223	0.00578187	0.00456116	0.0055274	0.00562236	0.00366994
0.63	0.00236962	0.00322512	0.00509699	0.00566974	0.00454157	0.00541333	0.00557324	0.00357907
0.64	0.00225058	0.00315885	0.00505701	0.00556949	0.00449833	0.00533021	0.00551411	0.00349146
0.65	0.00217517	0.00310215	0.00502687	0.00545212	0.00443167	0.0052355	0.00545167	0.00340436
0.66	0.00210112	0.0030497	0.00498446	0.00537061	0.0043618	0.00514912	0.00538649	0.00335663
0.67	0.0020266	0.00299384	0.00493402	0.00526383	0.00430075	0.00508463	0.00533079	0.00330684
0.68	0.00192129	0.0029334	0.00487286	0.00517321	0.00424117	0.00500598	0.00531197	0.0032675
0.69	0.00183272	0.00288372	0.00483401	0.00510213	0.00421325	0.00494516	0.00526135	0.00322085
0.7	0.00171538	0.00283604	0.00477213	0.00503637	0.00416094	0.004876	0.00518678	0.00315152
0.71	0.00162811	0.00278688	0.00474202	0.00494981	0.00411449	0.00481049	0.00513659	0.00310363
0.72	0.00153227	0.00274301	0.00470158	0.00487726	0.00407682	0.00476367	0.00506801	0.00305977
0.73	0.00145512	0.00268805	0.00467074	0.00479927	0.00402538	0.00468416	0.00502573	0.0030156
0.74	0.00134449	0.00263947	0.00463195	0.00470754	0.00397347	0.00463402	0.0049826	0.00295319
0.75	0.001243	0.00259191	0.00462931	0.00459755	0.00394856	0.00458417	0.00493336	0.00291459
0.76	0.00113235	0.00254514	0.00458563	0.00455365	0.00391878	0.00452147	0.00486249	0.00286766
0.77	0.00107475	0.0025019	0.00456024	0.00449571	0.00389485	0.00446994	0.0047977	0.00282498
0.78	0.00097728	0.00246994	0.00451827	0.00445009	0.00383268	0.00441486	0.0047537	0.00278073
0.79	0.000943282	0.00242562	0.00447121	0.00434657	0.00378581	0.00435652	0.00469675	0.0027127
0.8	0.0008744	0.00238706	0.00443055	0.00429823	0.00372868	0.00431398	0.00463998	0.0026765
0.81	0.000771873	0.00235271	0.00444763	0.00420486	0.00368945	0.00424874	0.00460062	0.00265647
0.82	0.000695691	0.00231821	0.00440954	0.00409164	0.00363447	0.00420786	0.00453937	0.00264109
0.83	0.000614146	0.0022875	0.00440063	0.00402813	0.0035781	0.00417189	0.00448707	0.00260899
0.84	0.000536515	0.00225767	0.00435318	0.00394866	0.00351847	0.00412154	0.0044262	0.00254142
0.85	0.000454719	0.00222269	0.00432604	0.00387627	0.00346757	0.00406978	0.00437422	0.00248648
0.86	0.000355559	0.00219253	0.00429436	0.00381893	0.00342652	0.00402788	0.0043175	0.00242532
0.87	0.000289831	0.00214879	0.00426744	0.00373887	0.00337032	0.00398264	0.00424662	0.0023442
0.88	0.000197118	0.00211548	0.00426509	0.00365809	0.00329487	0.0039587	0.00421853	0.00229485
0.89	0.00011579	0.00208111	0.0042608	0.00357306	0.00324193	0.00396136	0.00418083	0.00226514
0.9	2.57051e-05	0.00204559	0.00425289	0.0034957	0.0031944	0.00393551	0.00414918	0.00220056
0.91	-7.47492e-05	0.00200805	0.00422901	0.00343553	0.00311276	0.0039396	0.00410194	0.00214224
0.92	-0.0001478	0.00197448	0.00421345	0.00338631	0.00306329	0.00390768	0.00407664	0.00206242
0.93	-0.000231062	0.00194383	0.00419429	0.00329502	0.00300709	0.00389245	0.00404115	0.00202253
0.94	-0.000286622	0.00191066	0.00420281	0.00325542	0.00293531	0.0038911	0.00401216	0.00196431
0.95	-0.000337371	0.00186407	0.0041849	0.00322951	0.00287637	0.00388109	0.00396	0.00192476
0.96	-0.00039983	0.00183058	0.00418622	0.00317188	0.0027977	0.00386708	0.00390901	0.00189339
0.97	-0.000508522	0.00179438	0.00416829	0.0031121	0.002705	0.00383209	0.00384503	0.00185784
0.98	-0.000618019	0.0017605	0.0041487	0.00308051	0.00263008	0.00381295	0.00378746	0.00180791
0.99	-0.000695074	0.00173013	0.00410721	0.0030491	0.00257213	0.00376107	0.00375132	0.00177577

## Sheet: EGFR_PS_before
	cell#1	cell#2	cell#3	cell#4	cell#5	cell#6	cell#7	cell#8	cell#9	cell#10
0.01	5.88298e-05	0.000431487	0.000167314	0.00015341	0.000313488	7.3244e-05	0.00027311	0.000285465	0.000424621	0.000145133
0.02	0.000172074	0.000820019	0.000494567	0.000231808	0.000588584	0.000228423	0.00066357	0.000622781	0.00081655	0.000346736
0.03	0.000287677	0.00120159	0.000811219	0.000333261	0.000935859	0.000289186	0.000993902	0.000936358	0.00121703	0.000582943
0.04	0.000428738	0.00161901	0.00111137	0.000398012	0.00125089	0.000291509	0.00132631	0.00128547	0.00160796	0.000755194
0.05	0.000547634	0.00198477	0.00138174	0.000550078	0.00152624	0.00037398	0.00164797	0.00157377	0.0019662	0.000933569
0.06	0.000646037	0.00236408	0.00167353	0.000654739	0.00179153	0.000533306	0.00193197	0.00188887	0.00232343	0.00108586
0.07	0.000795303	0.00273924	0.00190283	0.000776607	0.00207177	0.000611768	0.00220104	0.00215262	0.00267695	0.00127336
0.08	0.000921416	0.00307902	0.00213922	0.000814643	0.0023137	0.000690132	0.00248604	0.00240426	0.00301384	0.00145764
0.09	0.00107807	0.00340285	0.00235359	0.000885046	0.00253401	0.000804555	0.00273961	0.00265762	0.00331628	0.00156253
0.1	0.0012045	0.00367447	0.00257814	0.000973297	0.00275524	0.000848241	0.00297143	0.00289486	0.00360114	0.00168664
0.11	0.00132031	0.00395993	0.00279893	0.00103269	0.00296554	0.00089719	0.00319416	0.00315313	0.00388819	0.00178937
0.12	0.00144565	0.00424413	0.00296113	0.00111091	0.00316645	0.000958502	0.00339644	0.00334387	0.00414251	0.0018605
0.13	0.00155974	0.00449044	0.00313345	0.00116627	0.0033433	0.00101252	0.00358977	0.00352569	0.00439787	0.00193094
0.14	0.00168121	0.00472901	0.00329149	0.00122797	0.00354419	0.0010464	0.00372593	0.00370088	0.00461133	0.00200222
0.15	0.00181744	0.00494236	0.00341247	0.00126438	0.00373176	0.00111898	0.00386373	0.00383847	0.00480853	0.00207444
0.16	0.00193051	0.00514173	0.00350838	0.0012917	0.00391958	0.00118637	0.00400028	0.00400268	0.00498421	0.00212085
0.17	0.00204842	0.00529411	0.00360403	0.00135295	0.00407463	0.00122831	0.00410081	0.00411329	0.00513034	0.00218366
0.18	0.00216735	0.00543437	0.00367821	0.0013719	0.00424121	0.00127762	0.00419652	0.00423146	0.00525589	0.00223062
0.19	0.00230633	0.00557165	0.00375155	0.00141304	0.00437853	0.00135757	0.00425128	0.0043348	0.00536801	0.00227455
0.2	0.00243013	0.00572445	0.00380832	0.00143897	0.00448058	0.00142597	0.00428973	0.00442585	0.00548146	0.0022968
0.21	0.00254359	0.0057959	0.00384276	0.00148134	0.00457643	0.0014772	0.00432297	0.00449871	0.00556046	0.00234514
0.22	0.00263916	0.00590628	0.00388328	0.00152166	0.00467955	0.00151819	0.00434168	0.00455293	0.00561289	0.00237486
0.23	0.00275537	0.00599114	0.00390351	0.00155442	0.0047816	0.00155884	0.00433717	0.00459838	0.00566135	0.0024132
0.24	0.0028342	0.00606779	0.00392479	0.00159061	0.0048376	0.00157178	0.00431715	0.004642	0.00570241	0.0024644
0.25	0.00291675	0.0061114	0.00393675	0.00164295	0.00490078	0.00159728	0.0042633	0.00466546	0.00572056	0.00251348
0.26	0.00299079	0.00615626	0.00391947	0.00167754	0.00497561	0.00163526	0.00422012	0.00466947	0.0057295	0.00255656
0.27	0.00304915	0.00618181	0.00390521	0.00169402	0.00502645	0.00164266	0.0041659	0.00468319	0.00572912	0.00261042
0.28	0.00309395	0.00618903	0.00388215	0.00171217	0.00508433	0.00166672	0.00409978	0.0046637	0.00571696	0.00267915
0.29	0.00313517	0.00618227	0.00383598	0.00171057	0.00515006	0.00166232	0.00402968	0.00465225	0.00568368	0.0026886
0.3	0.00319256	0.00615366	0.00378028	0.00172867	0.00519866	0.00167299	0.0039411	0.00463248	0.00565585	0.00273632
0.31	0.0032414	0.00610249	0.00374158	0.00172801	0.00521083	0.00167028	0.0038408	0.00461466	0.00561796	0.00275653
0.32	0.00326802	0.00606284	0.00368673	0.00172639	0.00520865	0.00163888	0.00374234	0.00458654	0.00556645	0.00277766
0.33	0.003299	0.00602955	0.00363326	0.00171984	0.00518815	0.00159007	0.00363286	0.00454644	0.00550076	0.00276754
0.34	0.00333046	0.00597136	0.00357533	0.00170467	0.0051451	0.00157214	0.00354537	0.00451476	0.00544589	0.00278032
0.35	0.00334664	0.00590929	0.00351105	0.00169989	0.00509304	0.00154151	0.00342902	0.00446099	0.00536658	0.00278706
0.36	0.00336712	0.00583139	0.00346246	0.00167526	0.00502857	0.0015384	0.0033327	0.00441542	0.00529339	0.00278908
0.37	0.00336598	0.00576016	0.00339972	0.00166406	0.00497141	0.00155729	0.00322297	0.00434632	0.00522037	0.00276736
0.38	0.0033666	0.00568486	0.00333349	0.00166864	0.00490579	0.00154999	0.0031171	0.00428863	0.0051521	0.00277394
0.39	0.00336287	0.00556016	0.00327123	0.00166578	0.00485713	0.00154806	0.00300378	0.00423217	0.00507058	0.00274576
0.4	0.00336195	0.00546708	0.00322939	0.00165298	0.00482409	0.00154419	0.00289867	0.00416386	0.00499603	0.00273882
0.41	0.00334386	0.00538148	0.00315692	0.00164423	0.00478689	0.00154633	0.00279811	0.0040928	0.00492129	0.00274455
0.42	0.0033277	0.00529824	0.00310275	0.00163252	0.00474232	0.00154819	0.0026885	0.00401567	0.00485303	0.00273811
0.43	0.00330896	0.00521537	0.00302737	0.00161539	0.00468529	0.00158439	0.00259201	0.00393974	0.00477439	0.0027206
0.44	0.00329424	0.00512008	0.00296277	0.00159891	0.00465425	0.00159236	0.00249647	0.00386644	0.004703	0.00269255
0.45	0.00327226	0.00501785	0.00289828	0.00156025	0.0046127	0.00158914	0.00239363	0.00380692	0.00463667	0.00266474
0.46	0.00323982	0.00492994	0.00282874	0.00154898	0.00457394	0.00159672	0.0022936	0.00373103	0.0045703	0.00262289
0.47	0.00320294	0.00484414	0.00277268	0.00152559	0.00453135	0.00161936	0.00220808	0.00366266	0.00451496	0.00258972
0.48	0.00317165	0.00478241	0.00269191	0.00150258	0.00448498	0.00160349	0.00212384	0.00359664	0.00444796	0.00255176
0.49	0.00313751	0.00468877	0.00264144	0.00148866	0.00445967	0.00157181	0.00203911	0.00352988	0.00438176	0.0025261
0.5	0.00311314	0.0046083	0.00258317	0.00147486	0.00441429	0.00154822	0.00196963	0.00347117	0.00430981	0.00248417
0.51	0.00308211	0.00452119	0.00253206	0.00143712	0.00439736	0.00154161	0.00190339	0.00342064	0.00425084	0.00245342
0.52	0.00303927	0.0044364	0.00248776	0.00141094	0.00437224	0.0015348	0.00182535	0.0033842	0.00419524	0.00240397
0.53	0.00299699	0.00436365	0.00243829	0.00140303	0.00436042	0.00153772	0.00174901	0.00335134	0.00413931	0.00236077
0.54	0.00295511	0.00428583	0.00240168	0.0013718	0.00433682	0.00152686	0.00168246	0.00330274	0.00408486	0.00232792
0.55	0.00291641	0.00419025	0.00236984	0.00135243	0.00431896	0.00151311	0.00161857	0.00325023	0.00403505	0.00228038
0.56	0.00287618	0.00412695	0.00233883	0.00130979	0.00433289	0.00148773	0.00156011	0.00320512	0.00398539	0.00224782
0.57	0.00283216	0.00405971	0.00229424	0.00128015	0.00431864	0.00149082	0.00149111	0.00315737	0.00394461	0.00223899
0.58	0.00278723	0.00398963	0.0022677	0.00127365	0.00431669	0.00145988	0.00142347	0.00311892	0.00390016	0.00220885
0.59	0.00275059	0.00392034	0.0022399	0.00123665	0.00432423	0.00146586	0.00136203	0.00309012	0.00386488	0.00217547
0.6	0.00269723	0.00383827	0.00219634	0.0012196	0.00433464	0.00143089	0.001313	0.00305579	0.00383376	0.00215207
0.61	0.00265453	0.00375892	0.00215925	0.00119472	0.00433694	0.00142291	0.00126947	0.00302896	0.00380365	0.00212799
0.62	0.00261719	0.00369386	0.0021351	0.00117375	0.00434457	0.0014051	0.00123067	0.00299896	0.00378141	0.0021131
0.63	0.0025847	0.00364323	0.00209523	0.0011647	0.00434342	0.00139351	0.00118539	0.00297323	0.00375104	0.00207132
0.64	0.00254836	0.00356472	0.0020867	0.00114981	0.00434037	0.00135951	0.00114319	0.00294611	0.00371558	0.00203985
0.65	0.00250991	0.00350079	0.0020635	0.00113023	0.00436163	0.00137187	0.00111068	0.00291608	0.00369085	0.002008
0.66	0.00245693	0.00344518	0.00204232	0.00113483	0.00436291	0.0013873	0.00107553	0.00290073	0.00367012	0.00197493
0.67	0.00241193	0.00337047	0.00203084	0.00114116	0.00435663	0.00137844	0.0010342	0.00288937	0.00365121	0.00194338
0.68	0.00236511	0.00331958	0.00200426	0.00112815	0.00436425	0.00137117	0.00101492	0.00287718	0.00363563	0.00190847
0.69	0.0023161	0.00325711	0.00197387	0.00112892	0.00436843	0.00137058	0.000994173	0.00285172	0.00361285	0.00187701
0.7	0.00227446	0.00321255	0.00196295	0.00114974	0.00438551	0.0014046	0.000969946	0.00282737	0.00360208	0.00185592
0.71	0.00224353	0.00315818	0.00194753	0.00115643	0.00439799	0.00140774	0.000946086	0.00279968	0.00358774	0.00182614
0.72	0.0022043	0.00308761	0.0019337	0.00116111	0.00440173	0.00140987	0.000936188	0.00278016	0.00358359	0.00179769
0.73	0.00216713	0.00302828	0.00191348	0.00117037	0.00440684	0.00139877	0.000916952	0.00275818	0.00357198	0.00175804
0.74	0.00212374	0.00295118	0.00189905	0.00117413	0.00439657	0.00140277	0.000906061	0.0027279	0.00356595	0.00171729
0.75	0.00208159	0.00288544	0.00189946	0.00117877	0.00439359	0.00141879	0.000898546	0.00271337	0.00355504	0.00168101
0.76	0.00204021	0.00282674	0.00189055	0.00118217	0.00439786	0.00143965	0.000877445	0.00268721	0.00353796	0.001641
0.77	0.00199334	0.00277361	0.00188718	0.00119462	0.00439079	0.00145869	0.000867079	0.00267522	0.00353447	0.00160235
0.78	0.00194525	0.00271224	0.00188056	0.00120484	0.00437192	0.00146713	0.000859387	0.002665	0.00352662	0.00156225
0.79	0.00190128	0.0026595	0.00188811	0.0012388	0.00440323	0.00147954	0.000847765	0.00264867	0.0035134	0.0015237
0.8	0.00185612	0.00259486	0.00190632	0.00124746	0.0043786	0.00148415	0.000837893	0.00263368	0.00349795	0.00149055
0.81	0.00181303	0.00252388	0.00190795	0.00126792	0.0043705	0.0014986	0.000825479	0.0026177	0.00348558	0.00145294
0.82	0.00178412	0.00244878	0.00191065	0.0012841	0.00438107	0.00150555	0.000821167	0.00260351	0.00347169	0.00141558
0.83	0.00175307	0.00237988	0.00190802	0.00129707	0.00438526	0.001482	0.000814763	0.00258814	0.00346199	0.00138579
0.84	0.00172127	0.00230625	0.00191107	0.00131425	0.00439471	0.00147321	0.000810869	0.00256683	0.00344276	0.0013507
0.85	0.00169445	0.00222873	0.00190856	0.00133374	0.00440572	0.00144805	0.000793635	0.00254177	0.00342139	0.0013219
0.86	0.00166551	0.0021584	0.00190417	0.00134873	0.00442477	0.00141709	0.000781076	0.00253149	0.00339499	0.00129089
0.87	0.00164247	0.00210603	0.00190441	0.00136944	0.00444801	0.00140269	0.000763848	0.00252112	0.0033692	0.00125809
0.88	0.00162218	0.00205156	0.00189864	0.00138295	0.00445857	0.00138274	0.000755566	0.00250506	0.00333963	0.00121627
0.89	0.00158283	0.00199353	0.00189956	0.00139705	0.00446284	0.00137667	0.000744659	0.00248837	0.00331391	0.00118268
0.9	0.00155999	0.00193773	0.00191482	0.00142222	0.00447852	0.00136998	0.000728887	0.00247498	0.00329041	0.00114885
0.91	0.00153581	0.00188138	0.00191226	0.00143815	0.00449824	0.00134837	0.000709331	0.0024506	0.00325756	0.00110682
0.92	0.00151053	0.00182399	0.00191537	0.00145463	0.00451881	0.00132238	0.000684525	0.00244035	0.00323021	0.00106711
0.93	0.00148218	0.00177173	0.00191084	0.00146663	0.00453721	0.00129683	0.000664085	0.00242653	0.00320429	0.00102733
0.94	0.00146088	0.00172829	0.00191724	0.00147008	0.00456707	0.00126689	0.000634271	0.00242529	0.00317028	0.000996639
0.95	0.00143652	0.00169351	0.00191346	0.0014689	0.00457599	0.00125051	0.000616093	0.00241481	0.00313351	0.00095458
0.96	0.0014174	0.00164401	0.00189911	0.00146898	0.00459948	0.00124544	0.000601966	0.00240081	0.00310232	0.0009258
0.97	0.00138812	0.0015794	0.00189683	0.00146283	0.0046263	0.00121989	0.000579534	0.00237026	0.00306116	0.000888229
0.98	0.00137077	0.0015007	0.00188342	0.00147075	0.00463631	0.00121679	0.00054574	0.00234107	0.00302363	0.000852805
0.99	0.00135814	0.00143246	0.00186912	0.00147991	0.00465322	0.00120582	0.00051539	0.00231297	0.00297954	0.000813633

## Sheet: EGFR_PS_after
	cell#1	cell#2	cell#3	cell#4	cell#5	cell#6	cell#7	cell#8
0.01	0.000194648	9.8728e-05	0.000146395	8.77618e-05	0.00021565	0.000238421	0.000596435	0.000525744
0.02	0.000310156	0.000247074	0.000402115	0.000364885	0.000569117	0.00047646	0.00123651	0.00119
0.03	0.00052943	0.000416199	0.000511194	0.000536536	0.000846961	0.000757184	0.00180505	0.00174507
0.04	0.000683935	0.000530721	0.000663693	0.000648075	0.00116	0.000968587	0.00239536	0.00219744
0.05	0.000824735	0.000615424	0.000831917	0.000780088	0.00138159	0.00128931	0.002871	0.00265053
0.06	0.000983238	0.000739064	0.000961765	0.000947182	0.001663	0.0015235	0.00339706	0.00312667
0.07	0.00109995	0.000857808	0.00107917	0.00111047	0.0018797	0.00176322	0.0038531	0.00356152
0.08	0.00123446	0.000979912	0.00118295	0.00124333	0.00213252	0.00195985	0.00430565	0.00395038
0.09	0.00133194	0.00109934	0.00130774	0.00136291	0.00237659	0.00215716	0.00465366	0.00445477
0.1	0.00144255	0.00121858	0.00141637	0.00150149	0.00260037	0.00237802	0.00502208	0.00486219
0.11	0.00153083	0.00133466	0.00150993	0.00158389	0.00283015	0.0025731	0.00533931	0.00513233
0.12	0.00161896	0.00141127	0.00158064	0.00164861	0.0030437	0.00275334	0.00563675	0.00549375
0.13	0.00171225	0.00151951	0.00167984	0.00170864	0.00322939	0.0029026	0.00589556	0.00576032
0.14	0.00176369	0.00156115	0.00175961	0.00179486	0.00338289	0.00306747	0.00609941	0.00609242
0.15	0.00179428	0.00165083	0.00182095	0.00182569	0.00351746	0.00322155	0.00630784	0.00624061
0.16	0.0018431	0.00172367	0.00184795	0.00186198	0.00365883	0.00335823	0.00649076	0.00642182
0.17	0.00190416	0.0018022	0.0018965	0.00190457	0.00375867	0.00348355	0.00659547	0.00653585
0.18	0.00191405	0.00187893	0.00194772	0.00191658	0.00388703	0.00359985	0.00670893	0.0067045
0.19	0.00188532	0.00189845	0.00200223	0.00197299	0.00397904	0.00370149	0.00676724	0.00679417
0.2	0.00193145	0.00196843	0.00205148	0.00199752	0.0040635	0.00380281	0.00681877	0.00689744
0.21	0.00193566	0.00202811	0.0020694	0.00204011	0.00414129	0.00390332	0.00680661	0.00698556
0.22	0.00191958	0.00205086	0.00208846	0.00204709	0.00418567	0.00396557	0.00683027	0.00712526
0.23	0.00192274	0.00205999	0.00212186	0.00204521	0.00422877	0.00401	0.00677378	0.00719619
0.24	0.00192484	0.00208185	0.00213004	0.00207334	0.00424882	0.0040775	0.0067348	0.00732185
0.25	0.00193433	0.00209457	0.00214062	0.00206797	0.00425961	0.00414003	0.00668175	0.00735143
0.26	0.00194873	0.00213993	0.00214102	0.00205545	0.00427673	0.00416225	0.00660466	0.0073757
0.27	0.00194585	0.00218701	0.0021431	0.00205702	0.00427937	0.00417647	0.00651967	0.00737633
0.28	0.00191652	0.00220431	0.002165	0.00203624	0.00427706	0.00422571	0.00641542	0.00741438
0.29	0.00190745	0.00220979	0.00215699	0.00201915	0.00425633	0.00422778	0.00628613	0.00741075
0.3	0.00186109	0.0022147	0.00213755	0.00199516	0.00425455	0.00423566	0.00612916	0.00736333
0.31	0.00186091	0.00224298	0.0021378	0.00196542	0.00423008	0.00423986	0.00599288	0.00732334
0.32	0.00182955	0.00226278	0.00212122	0.00192991	0.00421594	0.0042586	0.00586081	0.00730956
0.33	0.00180155	0.00228304	0.00210644	0.00191377	0.00418592	0.00428761	0.00570053	0.00722395
0.34	0.00177043	0.00229138	0.00208341	0.0018638	0.00413483	0.00427976	0.00554587	0.00713855
0.35	0.00172587	0.00227788	0.00206022	0.00185296	0.00408251	0.0042866	0.00541085	0.00710457
0.36	0.00167802	0.00228553	0.0020418	0.00184545	0.00402566	0.00428073	0.00525263	0.00707511
0.37	0.00163212	0.0022544	0.00202569	0.00179777	0.00395995	0.00426624	0.00508425	0.00703162
0.38	0.001595	0.00225184	0.00200953	0.00176915	0.00391475	0.0042093	0.00493255	0.00692509
0.39	0.00154148	0.00223059	0.00197552	0.00173736	0.00385836	0.00418101	0.00476904	0.0068002
0.4	0.0014954	0.00220675	0.00196891	0.00170543	0.00380433	0.00414192	0.00458723	0.00664722
0.41	0.00143601	0.00219321	0.00194039	0.00164625	0.0037355	0.00410678	0.00444658	0.00651984
0.42	0.00136734	0.00219017	0.00194102	0.00160512	0.00365259	0.00406225	0.00428083	0.00641701
0.43	0.00133692	0.00215618	0.00192801	0.00154941	0.00357726	0.0040063	0.004121	0.0062652
0.44	0.00130515	0.00213135	0.00192027	0.0015115	0.00352171	0.00393738	0.00393784	0.00615963
0.45	0.00126229	0.00207744	0.0018951	0.0014621	0.00345366	0.00390049	0.00379237	0.00601433
0.46	0.0012353	0.00207158	0.00185954	0.00142818	0.00338561	0.00385395	0.00361253	0.00583492
0.47	0.00119558	0.00205157	0.00183838	0.00138342	0.00331642	0.00378406	0.00344188	0.00569792
0.48	0.00116399	0.00204437	0.00180802	0.00134911	0.00322982	0.00374752	0.00325965	0.00555477
0.49	0.00112371	0.00201913	0.00178544	0.00131304	0.00315016	0.00369282	0.00309367	0.0053799
0.5	0.00109709	0.00200806	0.00176627	0.0012604	0.00306338	0.00363421	0.00296163	0.00519702
0.51	0.00106669	0.00200117	0.00174845	0.0012364	0.00297193	0.00357753	0.00279727	0.00499788
0.52	0.00102751	0.00198791	0.00172758	0.00120759	0.00288629	0.00352332	0.00263893	0.00478154
0.53	0.00100165	0.00197815	0.00170973	0.00117628	0.00281519	0.00349531	0.00251948	0.00457285
0.54	0.000986554	0.0019587	0.00168687	0.00116407	0.00273273	0.00346045	0.00238454	0.00438199
0.55	0.000978098	0.00194182	0.00165847	0.0011504	0.00267219	0.00341577	0.00225189	0.00416769
0.56	0.000952286	0.00194982	0.0016388	0.00112588	0.00260345	0.00338122	0.00214266	0.0039433
0.57	0.000927525	0.00195998	0.00161289	0.00110104	0.00253701	0.00333571	0.00201472	0.0037846
0.58	0.000889575	0.001971	0.00157635	0.0010631	0.00246369	0.00327559	0.00191009	0.0036254
0.59	0.000857528	0.00197162	0.00155889	0.00105883	0.0023893	0.00323881	0.00178643	0.00349734
0.6	0.000847527	0.00196911	0.00153	0.00103882	0.00232067	0.00321422	0.00169901	0.00336549
0.61	0.000819528	0.00198468	0.00150528	0.00103108	0.00224441	0.00318246	0.00158403	0.00323778
0.62	0.000799068	0.00198147	0.00147638	0.00104304	0.00218618	0.00317435	0.0014928	0.00310276
0.63	0.000775395	0.00198596	0.00144228	0.00104696	0.00211718	0.00312333	0.00137662	0.00294865
0.64	0.000760333	0.0019764	0.00141652	0.00102156	0.0020503	0.00308541	0.00128235	0.00280411
0.65	0.000758871	0.00197562	0.00137841	0.0010151	0.00198122	0.0030634	0.00119575	0.0026696
0.66	0.000744725	0.00198547	0.00135715	0.00101322	0.00192162	0.00302002	0.00112008	0.00253817
0.67	0.000738166	0.00197836	0.00132125	0.00100452	0.00186057	0.00300425	0.00105279	0.00240408
0.68	0.000734981	0.00197778	0.0012909	0.00100653	0.00180044	0.00298129	0.00103272	0.00231585
0.69	0.000739083	0.00197802	0.00128412	0.000999139	0.00174492	0.00295205	0.00097052	0.00221689
0.7	0.000735177	0.00197958	0.00125621	0.00100581	0.00169775	0.00291741	0.00092458	0.00212377
0.71	0.000732333	0.00198072	0.00122718	0.00101835	0.0016558	0.00288822	0.000880241	0.00205241
0.72	0.00071747	0.00197775	0.00119898	0.00102369	0.00162149	0.00287072	0.000831338	0.00198215
0.73	0.00070569	0.00199014	0.00117567	0.00102695	0.00159101	0.00284926	0.00078288	0.00189441
0.74	0.000713297	0.00199627	0.00115678	0.00104649	0.00154553	0.00281864	0.000733189	0.00184114
0.75	0.000719393	0.00199579	0.00112893	0.00105397	0.00151346	0.00280146	0.000714798	0.0017432
0.76	0.000707215	0.00200472	0.00111033	0.00106095	0.00149504	0.00277536	0.000674725	0.00166659
0.77	0.000702583	0.00201136	0.00108393	0.00106467	0.00147767	0.00274136	0.000651189	0.00158806
0.78	0.000699266	0.00200921	0.00105629	0.001053	0.00146098	0.00270155	0.000606635	0.00149366
0.79	0.000704176	0.00200869	0.00104133	0.00104109	0.00144858	0.00265123	0.000579608	0.00141973
0.8	0.000695029	0.00201115	0.00102177	0.00103564	0.00143315	0.00260652	0.000551152	0.00137159
0.81	0.000688272	0.00199287	0.00100036	0.00101453	0.00142754	0.00255465	0.000514535	0.00128127
0.82	0.000682105	0.00199664	0.000990287	0.000998881	0.00141428	0.00250726	0.000476511	0.00123855
0.83	0.000670792	0.00199813	0.000981051	0.000963237	0.00140549	0.00244558	0.00042877	0.00116312
0.84	0.000653039	0.00199336	0.000968885	0.000938997	0.00140948	0.00239877	0.000376503	0.00107001
0.85	0.000650106	0.00198185	0.000956698	0.000919646	0.00142288	0.00233367	0.000335221	0.000992401
0.86	0.000639276	0.00197085	0.000940483	0.000901059	0.00144335	0.00227649	0.000310991	0.000957929
0.87	0.000631527	0.00196114	0.000913152	0.000874815	0.00144831	0.00223126	0.000287621	0.000875287
0.88	0.000647952	0.00195644	0.000903944	0.000857628	0.00146439	0.00217802	0.000266062	0.000830605
0.89	0.000654704	0.00195027	0.000879208	0.000824801	0.00147856	0.00213742	0.000241454	0.000737807
0.9	0.000640974	0.00195533	0.000856311	0.000797762	0.00150773	0.0020957	0.000211467	0.000686627
0.91	0.000649527	0.00195723	0.000828771	0.000774173	0.00152963	0.00205205	0.000164172	0.000610979
0.92	0.00063932	0.00195228	0.000807872	0.000755463	0.00156181	0.00201016	0.000125817	0.000524416
0.93	0.000635401	0.00194566	0.000780148	0.000738138	0.00158945	0.00196797	9.65121e-05	0.000442212
0.94	0.000615126	0.0019302	0.000752418	0.000712396	0.00160353	0.00191471	6.22206e-05	0.000381168
0.95	0.000606943	0.00191472	0.000731566	0.000692556	0.0016282	0.00187081	4.05741e-05	0.000308759
0.96	0.000590331	0.00188956	0.000706231	0.000673634	0.00165354	0.00182731	-8.1029e-06	0.000255499
0.97	0.00056932	0.00186745	0.00067113	0.000660178	0.0016652	0.00178213	-4.57959e-05	0.00020274
0.98	0.000546101	0.00184542	0.000633829	0.000641562	0.00168508	0.0017416	-8.8967e-05	0.00013493
0.99	0.000532551	0.00180637	0.000598262	0.000620189	0.00170003	0.00170838	-0.000140042	1.34436e-05

## Sheet: PI(4,5)P2_PS_before
	cell#1	cell#2	cell#3	cell#4	cell#5	cell#6	cell#7	cell#8
0.01	0.000618052	0.000497606	2.40934e-05	7.96811e-05	-1.49622e-05	-1.36093e-05	0.000812774	0.000255361
0.02	0.00138055	0.00150171	0.000421695	0.000429705	0.000586139	0.000914325	0.00160767	0.00069592
0.03	0.00192615	0.00234767	0.000875762	0.000856074	0.0014501	0.00169174	0.00237224	0.000857605
0.04	0.00248492	0.00315476	0.00128889	0.00126918	0.00200051	0.00224824	0.00327672	0.0012393
0.05	0.00312085	0.00395501	0.00159807	0.00157161	0.00273849	0.00269959	0.00408018	0.00160381
0.06	0.00366665	0.0046785	0.00199671	0.00179254	0.00321294	0.00316449	0.00484667	0.00184802
0.07	0.00425383	0.00548941	0.00228701	0.00203902	0.00391496	0.00364335	0.00555845	0.00211607
0.08	0.00481255	0.00613195	0.00255103	0.00226663	0.00447995	0.00405012	0.00628466	0.00226042
0.09	0.00529246	0.00690032	0.00281707	0.00245391	0.00498559	0.00452607	0.00701958	0.00249456
0.1	0.0057846	0.00735813	0.00306267	0.00252095	0.00551853	0.00496738	0.00758943	0.00278237
0.11	0.00627651	0.00809495	0.0033492	0.00259929	0.00593382	0.00538843	0.00815394	0.00308588
0.12	0.00666987	0.008648	0.00352771	0.00271588	0.00642777	0.00577471	0.00870432	0.00334275
0.13	0.00710137	0.00908947	0.00366762	0.00290011	0.00680668	0.00609166	0.00920097	0.00357713
0.14	0.00745416	0.00946565	0.00382557	0.00290825	0.00712928	0.00630513	0.00966306	0.0038423
0.15	0.0078138	0.00988344	0.0039014	0.00300995	0.00749867	0.00654641	0.00999001	0.00407342
0.16	0.00808458	0.0101583	0.00403482	0.00310023	0.00784029	0.00678008	0.0102795	0.0042894
0.17	0.00833573	0.0104906	0.00412777	0.00314027	0.0081038	0.00691799	0.010557	0.0045129
0.18	0.00855679	0.0107345	0.0041795	0.00311588	0.00827236	0.00704676	0.0107625	0.00475436
0.19	0.00869989	0.0109316	0.00424382	0.00316828	0.00850041	0.00713523	0.0108788	0.00490736
0.2	0.0087905	0.0110561	0.00429826	0.00313364	0.00869366	0.00723794	0.0109762	0.00504074
0.21	0.00893953	0.0112406	0.00432897	0.00313749	0.00885226	0.00723024	0.0111053	0.00518565
0.22	0.00900439	0.0113027	0.00436075	0.00315469	0.00904607	0.00728354	0.0111209	0.0053253
0.23	0.00906176	0.0112892	0.0043959	0.00317956	0.00909889	0.00736587	0.0110953	0.00541699
0.24	0.00909144	0.0113102	0.00435466	0.00310273	0.00914129	0.00738857	0.0110395	0.00553855
0.25	0.0090987	0.0113676	0.00433995	0.00309074	0.00925869	0.00737342	0.0110381	0.00564247
0.26	0.00906005	0.0113264	0.00430505	0.00303198	0.00933345	0.00735407	0.0109664	0.00569292
0.27	0.00901564	0.011282	0.00425565	0.00302567	0.00934663	0.00733133	0.0109032	0.00571922
0.28	0.00899149	0.0112926	0.00422959	0.00300432	0.00934768	0.00725267	0.0108106	0.00578671
0.29	0.00893743	0.0112498	0.00420309	0.0030067	0.00932292	0.00722709	0.01067	0.00583735
0.3	0.00887302	0.0111807	0.00414449	0.00292666	0.00924404	0.00708899	0.0105291	0.00590147
0.31	0.00877081	0.0110911	0.0041204	0.00289607	0.00916489	0.00704594	0.0103481	0.00591857
0.32	0.00867974	0.0109426	0.00410764	0.00283853	0.00907666	0.00699877	0.010156	0.00592489
0.33	0.00855947	0.0107727	0.00401952	0.00273242	0.00895447	0.00691009	0.00997962	0.00595389
0.34	0.00841796	0.0106331	0.00402171	0.00267899	0.00883256	0.00692241	0.00974485	0.00593389
0.35	0.00827474	0.0104913	0.0040403	0.00267253	0.0087714	0.00684063	0.00954696	0.00592779
0.36	0.00812911	0.0103345	0.00400583	0.00261489	0.00869638	0.00670325	0.00932895	0.00587165
0.37	0.00801229	0.0101362	0.00394378	0.00255329	0.00861506	0.00661141	0.00914055	0.00584792
0.38	0.00787789	0.00998676	0.00387212	0.00254053	0.00851374	0.00655052	0.00894052	0.0058365
0.39	0.00775778	0.00980063	0.00380364	0.00246426	0.0084346	0.00648469	0.00873338	0.00577284
0.4	0.00763208	0.00956746	0.00373653	0.00243855	0.0083237	0.00639909	0.00858811	0.00567976
0.41	0.00748496	0.00937339	0.00368422	0.00240053	0.00823513	0.00634577	0.00837967	0.00561802
0.42	0.00733806	0.00922582	0.00367333	0.00231792	0.00820281	0.00633613	0.00820906	0.00553679
0.43	0.00721315	0.0091117	0.00364986	0.00224904	0.0080751	0.00632558	0.00803806	0.00539003
0.44	0.00707064	0.00898442	0.00363437	0.00221206	0.00803124	0.00631019	0.0078947	0.00528863
0.45	0.00692408	0.00888183	0.00359163	0.00216839	0.00793211	0.00630336	0.00776983	0.00521432
0.46	0.00674429	0.00874004	0.00350592	0.00220897	0.0077978	0.00632002	0.00763535	0.00513121
0.47	0.00664421	0.00854848	0.00345132	0.00216077	0.00774933	0.00636646	0.00752421	0.00507627
0.48	0.00649521	0.00842939	0.00340508	0.00214985	0.00771289	0.00640607	0.00742379	0.00498953
0.49	0.00638931	0.00828993	0.00339203	0.00211897	0.00768901	0.00639297	0.00733441	0.00488799
0.5	0.00624307	0.00814576	0.00332901	0.0020928	0.00764862	0.00643293	0.00723075	0.00477636
0.51	0.00612721	0.00795424	0.00329942	0.00210693	0.00761335	0.00649031	0.00714962	0.00467161
0.52	0.00600869	0.0078057	0.00324553	0.00216429	0.00755638	0.00649828	0.00708278	0.00453994
0.53	0.00589734	0.00763469	0.003182	0.00220833	0.00745711	0.00654327	0.00703624	0.00446747
0.54	0.00581506	0.00746837	0.00316328	0.00225493	0.0074285	0.00663416	0.00696275	0.00436695
0.55	0.00573041	0.00735999	0.00316814	0.00229968	0.00733421	0.00670213	0.00693887	0.00433629
0.56	0.00562661	0.00721332	0.00317549	0.00232787	0.00730912	0.00674303	0.00690338	0.00426697
0.57	0.00554225	0.00705932	0.00319388	0.00237566	0.00729625	0.00684284	0.00688009	0.00419535
0.58	0.0054723	0.00693782	0.00322988	0.0024066	0.00727718	0.00689209	0.00688128	0.00413978
0.59	0.00539504	0.00684934	0.00325327	0.00246542	0.00725035	0.00696694	0.00687595	0.00414771
0.6	0.00533594	0.00675053	0.00329853	0.00251522	0.00723093	0.00709646	0.00687506	0.00414366
0.61	0.00527488	0.00670961	0.00333348	0.00256656	0.00718554	0.0071536	0.00688298	0.00410775
0.62	0.00520661	0.00667651	0.00336172	0.00264726	0.00720336	0.00725869	0.00690463	0.00407
0.63	0.00518018	0.00664281	0.00341161	0.00269335	0.00719611	0.00735287	0.00690041	0.00406641
0.64	0.00512084	0.00660725	0.00345133	0.0027735	0.00718637	0.00743808	0.00693737	0.00404151
0.65	0.00508402	0.00653257	0.00353961	0.00284022	0.00718735	0.00758778	0.00697139	0.00401834
0.66	0.00508304	0.00649822	0.00360664	0.00288604	0.00726301	0.00772489	0.00702317	0.0039599
0.67	0.00504571	0.0064408	0.00368101	0.00297752	0.00731571	0.00784825	0.00706883	0.00396415
0.68	0.00503904	0.00638982	0.0037099	0.00302989	0.00733936	0.00801664	0.00711247	0.00393497
0.69	0.00502578	0.00636252	0.00378495	0.00310354	0.00737621	0.00810932	0.00714916	0.00395349
0.7	0.00502028	0.00631787	0.00382746	0.00319235	0.00741022	0.00822653	0.00718368	0.00392153
0.71	0.00501153	0.00621187	0.00391487	0.00326366	0.0074736	0.00838681	0.007211	0.00387523
0.72	0.00499833	0.00616897	0.003996	0.00338337	0.00751111	0.00853723	0.00725226	0.00386734
0.73	0.00498544	0.00608397	0.00407381	0.00348959	0.00761097	0.00865719	0.00729125	0.0038674
0.74	0.00499963	0.00603728	0.00409779	0.00356469	0.00769844	0.00872985	0.00735122	0.00384281
0.75	0.00502427	0.00598414	0.00420718	0.00368316	0.00779851	0.00881839	0.00742516	0.00382477
0.76	0.00505008	0.00590224	0.00427556	0.00379544	0.00785208	0.0089233	0.00748269	0.00383208
0.77	0.00505936	0.00588477	0.00435933	0.0038836	0.00794715	0.0090297	0.00753219	0.00384508
0.78	0.0050794	0.00584443	0.00441934	0.00399884	0.00804733	0.00909312	0.00761298	0.00385195
0.79	0.00510455	0.0057694	0.00447895	0.00407056	0.00816342	0.00911361	0.00767237	0.00382348
0.8	0.00511915	0.00572223	0.00453903	0.00417398	0.00825167	0.00915729	0.00774111	0.00382162
0.81	0.00513728	0.00566295	0.00460181	0.00427051	0.0083334	0.00918674	0.00780816	0.00376636
0.82	0.00515217	0.0055966	0.00466429	0.00441643	0.00844065	0.00919465	0.00786303	0.00374893
0.83	0.00516492	0.00558113	0.0046733	0.00452349	0.00853718	0.00919788	0.00794002	0.00373179
0.84	0.00517076	0.00553147	0.00469498	0.00469136	0.00862711	0.00922417	0.0080007	0.00375159
0.85	0.00515829	0.00549691	0.00472026	0.00482933	0.00869734	0.00926661	0.00802372	0.00374792
0.86	0.00514934	0.00547693	0.00473862	0.00496138	0.00880846	0.00930571	0.00804318	0.00372615
0.87	0.00513708	0.00545449	0.00475549	0.00511341	0.00894735	0.00933169	0.00809742	0.00369057
0.88	0.00513892	0.00541268	0.0047755	0.00525001	0.00905679	0.00932098	0.00813176	0.00368502
0.89	0.00512816	0.0053898	0.00480208	0.00542113	0.00917022	0.00927577	0.00817625	0.00364714
0.9	0.00512077	0.00540373	0.0048245	0.00555168	0.0092683	0.009283	0.00824943	0.00365126
0.91	0.00509118	0.00538201	0.00484377	0.00570885	0.00943408	0.00927472	0.00829159	0.00366871
0.92	0.00506191	0.00535755	0.00487839	0.00587121	0.00952866	0.00920834	0.00835929	0.00368408
0.93	0.0050379	0.00539861	0.00488838	0.00602403	0.00965486	0.00919793	0.00842676	0.00371799
0.94	0.00503334	0.0054614	0.00488675	0.00617804	0.00979954	0.00915397	0.00845398	0.00375112
0.95	0.00501868	0.0055146	0.00491925	0.00633318	0.0100083	0.00911936	0.00847194	0.00378389
0.96	0.00500838	0.00556979	0.00492874	0.00647002	0.0101882	0.00911793	0.00849964	0.00379793
0.97	0.00499645	0.00561833	0.00492521	0.00662974	0.010358	0.00914607	0.00854511	0.00383153
0.98	0.00499399	0.00561625	0.00489174	0.00680034	0.0104992	0.00915	0.00858041	0.00390422
0.99	0.00497445	0.00564573	0.00488826	0.00696527	0.0106238	0.00919138	0.00863205	0.00396189

## Sheet: PI(4,5)P2_PS_after
	cell#1	cell#2	cell#3	cell#4	cell#5	cell#6	cell#7	cell#8
0.01	0.00108986	0.000425655	7.7931e-05	0.000322683	3.91296e-06	0.000524134	0.000549523	0.000174761
0.02	0.00219734	0.000783764	0.00033244	0.000716625	0.000446392	0.00117566	0.00132787	0.000873014
0.03	0.00339576	0.00117491	0.000574574	0.00103826	0.000661105	0.0018217	0.00210268	0.00128512
0.04	0.00434647	0.00154063	0.000739021	0.00133802	0.00104593	0.00250174	0.00281814	0.00183805
0.05	0.00530446	0.0019003	0.00091234	0.0017425	0.00125356	0.00306326	0.00345989	0.00227769
0.06	0.00621658	0.00226768	0.00101396	0.00214372	0.00149549	0.00358476	0.004116	0.00269491
0.07	0.00706604	0.00258909	0.00116369	0.00254764	0.00176707	0.00407696	0.00465128	0.00314416
0.08	0.00795434	0.00293625	0.00130576	0.00281005	0.00196829	0.00454099	0.00521754	0.00355195
0.09	0.00864204	0.00322427	0.00147574	0.00311979	0.00218277	0.00496142	0.00570652	0.00393344
0.1	0.00944732	0.00349556	0.00157643	0.0032534	0.00239718	0.00537268	0.00616823	0.0042269
0.11	0.0100785	0.0037559	0.00163407	0.00346711	0.00256892	0.0057864	0.00660307	0.00450795
0.12	0.0106027	0.00401276	0.00167374	0.00374344	0.0028521	0.00609546	0.00694377	0.00479781
0.13	0.0110854	0.00424513	0.0017968	0.00390545	0.00300409	0.00644244	0.00728519	0.00500147
0.14	0.0115518	0.0044741	0.00195092	0.00405279	0.00313989	0.00672347	0.00752492	0.00524657
0.15	0.0120384	0.0046642	0.00202951	0.00416328	0.00331763	0.00696174	0.00776599	0.00546777
0.16	0.0124163	0.00480676	0.00220715	0.0043213	0.00336477	0.00718456	0.00797483	0.00565524
0.17	0.0127294	0.00493192	0.00228037	0.0045141	0.00349993	0.00738731	0.0081407	0.00576112
0.18	0.0129923	0.00505137	0.00234967	0.00462283	0.00355078	0.00754907	0.00826364	0.00593043
0.19	0.0131267	0.00514247	0.00240207	0.00470556	0.00363207	0.00765395	0.00837086	0.00604773
0.2	0.0132848	0.00519598	0.00249356	0.004817	0.00373854	0.00773548	0.00836151	0.00612808
0.21	0.013439	0.00524252	0.002576	0.00486188	0.00376008	0.00783037	0.00840988	0.00617734
0.22	0.0135433	0.00526154	0.00262183	0.00494577	0.00382335	0.00792147	0.00838967	0.00621962
0.23	0.0135398	0.00527511	0.00272898	0.00499388	0.00387327	0.00796967	0.00835464	0.00628071
0.24	0.0135625	0.00525783	0.00282281	0.00504477	0.00389906	0.00802305	0.00826275	0.00624864
0.25	0.0135323	0.00523657	0.00288633	0.00507175	0.00387797	0.00804083	0.00822174	0.00628198
0.26	0.0134569	0.00519268	0.00299581	0.00514458	0.00386586	0.00801703	0.00816231	0.00625746
0.27	0.0134038	0.00514964	0.00306071	0.0051296	0.0038445	0.0079741	0.00805408	0.00627197
0.28	0.0132956	0.0051012	0.0031112	0.00515683	0.00376532	0.00793341	0.00792456	0.00625319
0.29	0.0131665	0.00503056	0.00314038	0.00511778	0.00369868	0.00791772	0.00776217	0.00620721
0.3	0.0130327	0.0049477	0.00318467	0.00510921	0.00363793	0.00783095	0.00760887	0.00614603
0.31	0.0128765	0.00486812	0.00326608	0.00507472	0.00358111	0.00775843	0.00745913	0.00608304
0.32	0.0126913	0.00477762	0.00335682	0.00502082	0.00351912	0.00768592	0.00729755	0.00601894
0.33	0.0125199	0.00467127	0.00344322	0.00493422	0.00347119	0.00762215	0.00714508	0.00592534
0.34	0.012311	0.00455819	0.00353217	0.00486566	0.00337683	0.0075087	0.00696352	0.00590397
0.35	0.0121063	0.00445299	0.00364628	0.0048531	0.00333912	0.00739298	0.00677892	0.00585125
0.36	0.0118569	0.00433242	0.00372425	0.00479209	0.00331223	0.00730653	0.00660358	0.0057429
0.37	0.0116291	0.00420684	0.00381812	0.00469927	0.00321816	0.00716929	0.00639067	0.00562941
0.38	0.0113876	0.0040674	0.00393537	0.00464113	0.00315917	0.00706369	0.0061998	0.00551892
0.39	0.0112029	0.00392781	0.0039959	0.00453454	0.00312471	0.00694415	0.00600439	0.00544864
0.4	0.0109564	0.00380155	0.00402114	0.00447137	0.00309289	0.00682448	0.00581352	0.00534478
0.41	0.0106767	0.00366886	0.00407219	0.00440091	0.00306434	0.00665731	0.00560963	0.00526894
0.42	0.010396	0.00352212	0.00411772	0.00432264	0.00301748	0.00650509	0.00542946	0.0052023
0.43	0.0101148	0.00340192	0.00417992	0.00432772	0.00299868	0.00635007	0.00526543	0.00509291
0.44	0.00983543	0.00326923	0.00423338	0.00427112	0.00300275	0.00621719	0.00513933	0.00502322
0.45	0.00954112	0.00312967	0.00425715	0.00426818	0.0029819	0.00610397	0.00502468	0.00488533
0.46	0.00927643	0.00299654	0.00432772	0.00430474	0.00298162	0.00596029	0.00490957	0.00477974
0.47	0.00901566	0.00286662	0.00436656	0.00427709	0.00295701	0.00583974	0.00482225	0.00470466
0.48	0.00874978	0.00274025	0.00436441	0.00425489	0.00292718	0.00569467	0.00470102	0.00461204
0.49	0.00848459	0.00260991	0.00446972	0.00419439	0.00290387	0.00559476	0.00459017	0.00450455
0.5	0.00816308	0.00248021	0.0045152	0.00415716	0.00291616	0.00543851	0.00447662	0.00437693
0.51	0.00788633	0.00235982	0.00457856	0.00415583	0.00290154	0.0053219	0.00434704	0.00430257
0.52	0.00762292	0.00225683	0.00461527	0.00413595	0.00291148	0.00518711	0.00425273	0.00417751
0.53	0.00736796	0.00213661	0.00466727	0.00416769	0.00292943	0.00502046	0.00411553	0.00406696
0.54	0.00711979	0.00203323	0.00471831	0.00418645	0.00292939	0.00487767	0.00401328	0.0039876
0.55	0.00689878	0.00193612	0.00479657	0.0041687	0.00297503	0.00473812	0.00391642	0.00389303
0.56	0.00665288	0.00183421	0.0048592	0.00421256	0.00298013	0.00459711	0.00384229	0.00381357
0.57	0.00639533	0.00174825	0.0048935	0.0042364	0.00297494	0.00451969	0.00376303	0.00375243
0.58	0.00618464	0.00165871	0.0049591	0.00428376	0.0029376	0.00440903	0.00366562	0.00368423
0.59	0.00600525	0.00157919	0.00501254	0.00431702	0.00294685	0.00431873	0.00359223	0.00361357
0.6	0.00579042	0.00150254	0.00504422	0.00436663	0.00293735	0.00423762	0.00353481	0.00352956
0.61	0.0055753	0.00143721	0.00510812	0.00440133	0.00290472	0.00415024	0.0034696	0.00349361
0.62	0.00542233	0.00136266	0.00517017	0.00442142	0.00288324	0.00408232	0.00341776	0.00345176
0.63	0.0052913	0.00129	0.00520916	0.00451682	0.0028858	0.00402296	0.00338281	0.00339789
0.64	0.00513098	0.00121973	0.00523341	0.00462929	0.0028816	0.0039458	0.00331973	0.00340497
0.65	0.00495573	0.00115437	0.00526434	0.00472439	0.00287909	0.00388597	0.00326412	0.00335407
0.66	0.00483056	0.0010792	0.00529458	0.00482168	0.00287511	0.00381567	0.00320537	0.00332626
0.67	0.00467467	0.00102358	0.00530135	0.00490879	0.00290108	0.00375679	0.00317625	0.00327637
0.68	0.00452179	0.000961474	0.00535	0.0049782	0.00292579	0.00370479	0.00312846	0.0032387
0.69	0.00439349	0.000918107	0.00540047	0.00505159	0.00293621	0.00366312	0.00309728	0.00321287
0.7	0.00423823	0.000867248	0.00541789	0.0051012	0.00296134	0.00363517	0.00304977	0.00316032
0.71	0.00408439	0.000815999	0.00546971	0.00520735	0.00296135	0.00358539	0.00299483	0.00312789
0.72	0.00392941	0.000764313	0.00550074	0.00528436	0.00295895	0.00355062	0.00296321	0.00305176
0.73	0.00379284	0.000723839	0.00554291	0.00537334	0.00297337	0.00350712	0.00291923	0.00303356
0.74	0.00362357	0.000675844	0.00558215	0.00545833	0.00295699	0.00345865	0.00285768	0.00296763
0.75	0.0034713	0.000627789	0.00559907	0.00562547	0.00297829	0.00340513	0.00281734	0.00290465
0.76	0.0033158	0.000582214	0.00562994	0.00571316	0.002933	0.00336748	0.00276778	0.00290512
0.77	0.0031693	0.000548602	0.00565477	0.00583145	0.0029309	0.00334458	0.00271968	0.00285615
0.78	0.00304395	0.000501682	0.00567008	0.00597268	0.00292429	0.00333119	0.00266938	0.00283154
0.79	0.0029186	0.000458077	0.0056958	0.00610148	0.00292061	0.00328623	0.00262282	0.00278368
0.8	0.00279036	0.00041508	0.00572865	0.00625237	0.00291149	0.00326178	0.00254585	0.00275743
0.81	0.00267374	0.000377339	0.00574166	0.00637403	0.0028965	0.0032357	0.00248514	0.00271359
0.82	0.00252905	0.000341468	0.00579712	0.00656539	0.00288088	0.00321056	0.00242976	0.00266488
0.83	0.00239607	0.000297338	0.00585876	0.00670601	0.00287803	0.00319397	0.00236958	0.00262546
0.84	0.00226465	0.000264555	0.00590715	0.00683239	0.00289382	0.00317371	0.00232927	0.00256925
0.85	0.00214739	0.00023027	0.00596762	0.0069958	0.00288868	0.00315216	0.00231218	0.00253127
0.86	0.00202143	0.000193428	0.00602476	0.00712008	0.00288625	0.00313389	0.00227001	0.00249207
0.87	0.00191006	0.000157949	0.00606843	0.00723759	0.00289367	0.0031336	0.00220957	0.00247532
0.88	0.00179794	0.000114948	0.0060923	0.00741006	0.00291092	0.00311713	0.00215978	0.00240741
0.89	0.00167727	7.9493e-05	0.00611781	0.00755075	0.00291101	0.00308862	0.00212057	0.00236347
0.9	0.00156106	4.01974e-05	0.00617864	0.00771008	0.00292513	0.00306958	0.00206787	0.00232303
0.91	0.00143829	1.17968e-05	0.00625781	0.00784208	0.00294299	0.00302645	0.00201628	0.00227468
0.92	0.00130075	-2.67555e-05	0.00632687	0.00795847	0.00297586	0.00299027	0.00198156	0.00222769
0.93	0.00115751	-5.25979e-05	0.00639302	0.00810051	0.00297422	0.00294315	0.0019053	0.00219802
0.94	0.00104708	-8.72137e-05	0.00646912	0.00825435	0.00298029	0.00289446	0.00186779	0.00211613
0.95	0.000937416	-0.000117602	0.00655214	0.00837214	0.00299523	0.00284916	0.00182047	0.00203013
0.96	0.000791988	-0.000149998	0.00662572	0.00848714	0.0030089	0.00278072	0.00177053	0.00192601
0.97	0.00067639	-0.000175246	0.00670376	0.00862197	0.00301932	0.00274013	0.00170597	0.00183143
0.98	0.00054234	-0.000197867	0.00681843	0.00873321	0.00303573	0.00267907	0.00164001	0.00177439
0.99	0.000402974	-0.000231401	0.00690612	0.00885594	0.00303192	0.00262494	0.00158878	0.00168157
