# Supplementary material for: Bilateral regulation of EGFR activity and local PI(4,5)P2 dynamics in mammalian cells observed with superresolution microscopy
Source: eLife journal article supplement (doi:10.7554/elife.101652), 2024-10-09
Supplement: fig2-data1 [file Figure 2B.xlsx]

## Sheet: EGFR_PI(4,5)P2_0min
	cell#1	cell#2	cell#3	cell#4	cell#5	cell#6	cell#7	cell#8	cell#9	cell#10	cell#11	cell#12	cell#13	cell#14	cell#15	cell#16	cell#17
0.01	0.00180624	0.00255436	0.000820942	0.000762056	0.000642641	0.000417496	0.000601765	0.00139712	0.000831611	0.000471482	0.000733815	0.000627121	0.00081575	0.00101305	0.000395625	0.000887307	0.000269914
0.02	0.00375744	0.00503239	0.00164443	0.00149621	0.00127987	0.000857957	0.00120284	0.00282868	0.00171143	0.000952542	0.00147702	0.00127206	0.00166399	0.00203331	0.000824923	0.00175997	0.000557137
0.03	0.00575121	0.00730701	0.00249263	0.0022635	0.00191524	0.00130093	0.00178811	0.00447424	0.00257234	0.00145257	0.00222672	0.00191723	0.00251021	0.00308956	0.00124095	0.00261424	0.000795421
0.04	0.00767424	0.00933515	0.00337716	0.00304767	0.00253845	0.00174028	0.00236227	0.00630854	0.00341116	0.00196826	0.00297452	0.00258273	0.00336181	0.00423656	0.00166787	0.0034691	0.00107209
0.05	0.009549	0.0109883	0.00429762	0.00380502	0.00316556	0.00217365	0.00293571	0.00822262	0.00425748	0.00249348	0.00370406	0.00324333	0.00421221	0.00538015	0.00211773	0.00429944	0.00139042
0.06	0.0112898	0.0123742	0.00523204	0.00456822	0.00378467	0.00262193	0.003526	0.0101036	0.00513951	0.00301022	0.00447123	0.0039364	0.00507045	0.00665157	0.00253424	0.00515151	0.00175511
0.07	0.0129505	0.0135086	0.00615333	0.00538213	0.00441297	0.00309026	0.00409766	0.0119659	0.00607907	0.00352025	0.00523962	0.00466985	0.00594379	0.00801876	0.002922	0.00599667	0.00211713
0.08	0.0143667	0.0144029	0.00703583	0.00624632	0.00504887	0.00356173	0.00468478	0.0137572	0.00701743	0.00402793	0.00605295	0.00542466	0.00687554	0.00954793	0.00334263	0.00683506	0.00246586
0.09	0.0156898	0.0151347	0.00787084	0.00712369	0.00568434	0.00404824	0.00527601	0.0154357	0.0078888	0.00457056	0.00687082	0.00619935	0.00782951	0.0111569	0.00376991	0.00763771	0.00283525
0.1	0.0168276	0.0157246	0.00862162	0.00799651	0.00630502	0.00454005	0.00587925	0.0169928	0.00871039	0.00514908	0.00768259	0.00694612	0.00880447	0.0127066	0.00417573	0.00839508	0.00321205
0.11	0.0177434	0.0161752	0.00929211	0.0088312	0.00689961	0.00504696	0.00652914	0.0182826	0.0094614	0.00573126	0.0084558	0.00766761	0.00976003	0.0142143	0.0045903	0.00910423	0.00362835
0.12	0.0184204	0.0165219	0.00987062	0.00962468	0.00747174	0.00559186	0.00716391	0.0193144	0.0101515	0.00630109	0.00914545	0.00832808	0.0106793	0.0155639	0.00499496	0.00974904	0.0040317
0.13	0.0188468	0.0168015	0.0103393	0.0103926	0.00798894	0.00618702	0.00776811	0.020032	0.0107569	0.00688432	0.00974504	0.00892201	0.0115314	0.0167745	0.0053734	0.0103309	0.00442431
0.14	0.0191573	0.0170019	0.0106966	0.0111291	0.00844745	0.00678365	0.00831181	0.0204292	0.0112774	0.00744251	0.0102862	0.00945776	0.012288	0.0178065	0.005747	0.0108497	0.00481455
0.15	0.0193065	0.0171356	0.0109587	0.0117967	0.00885872	0.00739105	0.00878107	0.0206343	0.0117314	0.00796988	0.0107366	0.00990345	0.0128949	0.0186729	0.00607942	0.0113008	0.00518088
0.16	0.0193964	0.0172256	0.0111575	0.0124034	0.00922515	0.00796486	0.00918922	0.0206967	0.0120948	0.0084737	0.0111108	0.0102722	0.0133754	0.0193017	0.00639554	0.0116793	0.0054642
0.17	0.0193926	0.0172634	0.0112918	0.0129428	0.0095399	0.00851459	0.00954724	0.0206774	0.012383	0.00893531	0.0113962	0.0105538	0.0137701	0.019699	0.00668962	0.0119883	0.00572549
0.18	0.0193466	0.0172591	0.0113751	0.0134004	0.00980387	0.00901793	0.00984893	0.0205667	0.012612	0.00934051	0.0116067	0.0107578	0.0141063	0.0198852	0.00695404	0.0122303	0.00594815
0.19	0.0192548	0.0172172	0.0114214	0.0137767	0.0100206	0.00942458	0.0100804	0.0203947	0.0127947	0.00967541	0.0117461	0.0108974	0.0143674	0.0199808	0.0072029	0.0124249	0.00611681
0.2	0.019127	0.0171466	0.0114277	0.0140551	0.0102017	0.00975365	0.0102515	0.0202601	0.0129427	0.00994564	0.0118443	0.0109788	0.0145965	0.0199306	0.00744457	0.0125643	0.00626806
0.21	0.0189874	0.0170626	0.011414	0.0142812	0.0103399	0.0100149	0.0103734	0.0200142	0.0130365	0.010158	0.0119124	0.0110149	0.0147701	0.0198144	0.00767228	0.0126632	0.00638262
0.22	0.0187917	0.0169308	0.0113668	0.0144624	0.0104454	0.0102233	0.0104589	0.0197583	0.0131141	0.010299	0.0119322	0.0110186	0.0149041	0.0196436	0.00786412	0.0127175	0.00646245
0.23	0.018589	0.0167957	0.0112993	0.0145996	0.0105204	0.010387	0.0105045	0.0194972	0.0131399	0.0104037	0.0119257	0.0109858	0.0149912	0.0194406	0.00805544	0.0127286	0.00655739
0.24	0.0183735	0.0166391	0.0112025	0.0146832	0.0105646	0.0104977	0.0105189	0.0192222	0.0131476	0.010471	0.0118932	0.0109256	0.0150476	0.0192112	0.00822	0.0127032	0.00662959
0.25	0.0181121	0.0164651	0.011099	0.0147404	0.0105832	0.0105624	0.0105092	0.0189235	0.0131198	0.0105066	0.0118242	0.0108429	0.0150612	0.0189427	0.00837298	0.0126437	0.00668285
0.26	0.01784	0.016276	0.0109815	0.0147672	0.01058	0.0106153	0.0104747	0.0186043	0.0130663	0.0105099	0.0117295	0.010739	0.0150445	0.0186715	0.00850622	0.0125553	0.00672888
0.27	0.0175612	0.0160705	0.0108491	0.014755	0.0105542	0.0106404	0.0104166	0.0183032	0.013001	0.0104802	0.011625	0.0106191	0.0150048	0.018385	0.00860662	0.0124332	0.00676168
0.28	0.0172847	0.0158542	0.0107011	0.0147193	0.0105014	0.0106384	0.0103319	0.0180107	0.0129159	0.010431	0.0114924	0.0104935	0.0149321	0.0180739	0.00870781	0.0122862	0.0067917
0.29	0.0169988	0.0156357	0.0105535	0.0146592	0.010433	0.0106165	0.0102273	0.0177099	0.0128093	0.0103663	0.0113504	0.0103543	0.0148429	0.0177764	0.00879781	0.0121202	0.00678954
0.3	0.0167412	0.0154186	0.0104001	0.0145874	0.0103482	0.0105776	0.0101048	0.0174097	0.0126902	0.0102857	0.0111888	0.0102005	0.0147447	0.0174763	0.00885981	0.0119303	0.00677339
0.31	0.0164682	0.0151962	0.0102336	0.0144958	0.0102513	0.0105173	0.00996804	0.017099	0.0125638	0.0101977	0.0110196	0.0100537	0.014615	0.0171665	0.00891228	0.0117308	0.00676772
0.32	0.0161861	0.014976	0.0100709	0.014392	0.0101433	0.010449	0.00983238	0.0167799	0.0124253	0.0100881	0.0108365	0.00989916	0.0144827	0.016847	0.0089655	0.011516	0.00675051
0.33	0.0158922	0.014756	0.00989723	0.014267	0.010022	0.0103599	0.00968186	0.0164688	0.0122769	0.00998229	0.0106475	0.00973588	0.0143399	0.0165226	0.00900864	0.0112869	0.00671501
0.34	0.0156153	0.0145247	0.00972714	0.0141335	0.00989181	0.0102657	0.00952972	0.0161581	0.0121279	0.00986272	0.0104485	0.00957618	0.0141788	0.0162257	0.00905606	0.011049	0.00669255
0.35	0.0153299	0.0142928	0.00956326	0.0139925	0.00975474	0.01016	0.00936557	0.0158623	0.0119763	0.00972873	0.010251	0.00941626	0.0140232	0.0159071	0.00908144	0.0108034	0.00664943
0.36	0.015041	0.0140821	0.00939056	0.0138332	0.00960796	0.0100518	0.00919355	0.0155655	0.0118205	0.00958671	0.0100522	0.00924822	0.0138506	0.0156138	0.00908943	0.0105545	0.00661759
0.37	0.0147702	0.0138673	0.00922095	0.0136804	0.00946038	0.00993111	0.00902249	0.0152623	0.011669	0.00945134	0.00984499	0.00907874	0.013677	0.0153158	0.00910146	0.0102989	0.00656205
0.38	0.0144853	0.0136678	0.00905118	0.0135132	0.00930514	0.00980579	0.00884655	0.0149703	0.0115101	0.00931057	0.00964839	0.00892221	0.0135003	0.0150225	0.00909356	0.0100448	0.00652008
0.39	0.014212	0.0134701	0.00888209	0.0133424	0.00915219	0.00968661	0.0086777	0.0146813	0.0113536	0.00916371	0.00944917	0.00877164	0.013313	0.0147364	0.00908555	0.00978351	0.00647811
0.4	0.0139521	0.013274	0.00872848	0.0131638	0.00899339	0.00955469	0.00850028	0.014401	0.0111961	0.00901466	0.00924875	0.00863012	0.0131313	0.0144354	0.00906574	0.00952234	0.00642268
0.41	0.0136846	0.0130871	0.00858265	0.0130021	0.00883709	0.00942189	0.00832565	0.0141215	0.0110396	0.00887039	0.00905834	0.00848681	0.0129477	0.0141573	0.00904857	0.0092682	0.00635733
0.42	0.0134203	0.0129027	0.00843872	0.0128153	0.00867563	0.00928398	0.00815283	0.0138682	0.0108938	0.00872707	0.00886872	0.00835216	0.0127585	0.0138996	0.00902344	0.00901672	0.00629056
0.43	0.0131606	0.0127348	0.00829195	0.0126317	0.00851691	0.00915196	0.00798983	0.0136151	0.0107477	0.00859247	0.00868803	0.00821332	0.0125785	0.0136098	0.00901423	0.0087677	0.00622775
0.44	0.0129183	0.0125681	0.00815388	0.0124433	0.00836175	0.0090196	0.00782737	0.0133669	0.0106017	0.00844608	0.00850949	0.00808155	0.0124014	0.0133193	0.00900279	0.00852711	0.00616929
0.45	0.0126765	0.0124098	0.0080112	0.0122582	0.00820797	0.00888696	0.00767092	0.0131334	0.0104649	0.00831425	0.00833361	0.00796068	0.0122249	0.0130454	0.00897562	0.00829301	0.0060997
0.46	0.0124565	0.01225	0.00788115	0.0120767	0.0080569	0.00876005	0.00751782	0.0129049	0.0103454	0.00817813	0.00816633	0.00784498	0.0120475	0.0127912	0.00895434	0.00806442	0.00603624
0.47	0.012244	0.012108	0.00775752	0.0118903	0.00790858	0.00863102	0.00736378	0.0126893	0.0102264	0.00804768	0.00800726	0.00773631	0.011876	0.0125421	0.0089267	0.00784203	0.00596731
0.48	0.0120228	0.0119737	0.00764332	0.0117174	0.00776812	0.00850792	0.00721654	0.0124825	0.0101091	0.00791707	0.00784977	0.00762823	0.0117082	0.0123043	0.00889781	0.0076273	0.00590318
0.49	0.011818	0.0118435	0.00752751	0.0115523	0.00763035	0.00839922	0.00706922	0.0122789	0.00999373	0.00778809	0.00770495	0.00752759	0.0115534	0.0120464	0.00886437	0.00741933	0.00582315
0.5	0.0116042	0.0117267	0.00741744	0.0113798	0.00749533	0.00828222	0.00693156	0.0120887	0.00988672	0.00766265	0.00756014	0.00743214	0.0113977	0.0118076	0.00883972	0.00722083	0.00574622
0.51	0.0113979	0.0116	0.00731342	0.0112121	0.0073669	0.00816356	0.00680382	0.0118965	0.00978161	0.00753654	0.00742731	0.00734447	0.0112464	0.0115837	0.00880811	0.00703101	0.00567623
0.52	0.0111959	0.0114831	0.00721568	0.011042	0.00723818	0.0080535	0.00668061	0.0117234	0.00968652	0.00741965	0.00729889	0.00725724	0.0111014	0.0113602	0.00877907	0.00684618	0.00559763
0.53	0.0109971	0.0113746	0.00712081	0.0108827	0.00711499	0.00794678	0.0065626	0.0115566	0.00958936	0.00730514	0.00717958	0.00717916	0.0109558	0.0111618	0.00874879	0.00667117	0.00551306
0.54	0.0108133	0.0112648	0.00703469	0.0107309	0.00700015	0.00784281	0.00644436	0.011415	0.00949788	0.00719664	0.00706786	0.00710832	0.0108176	0.0109516	0.00870971	0.0065049	0.00543381
0.55	0.0106338	0.0111615	0.00695603	0.0105825	0.00689044	0.00774646	0.00633596	0.0112552	0.00941047	0.00708701	0.00695562	0.00703743	0.0106907	0.0107214	0.00867054	0.00634232	0.00535436
0.56	0.0104486	0.0110632	0.00687321	0.010429	0.00678342	0.00764238	0.00623042	0.0110967	0.00932427	0.00699089	0.00684979	0.00697165	0.0105593	0.0105062	0.00864437	0.006191	0.0052822
0.57	0.0102737	0.0109729	0.0067956	0.010288	0.00668229	0.00754374	0.00613162	0.0109694	0.00924068	0.00689098	0.00675466	0.00690946	0.0104372	0.0102901	0.00861768	0.00604212	0.0052132
0.58	0.0101245	0.0108775	0.00672101	0.0101434	0.00658661	0.00744938	0.00603327	0.0108398	0.00916515	0.00679793	0.0066638	0.00685337	0.010322	0.0100842	0.00858293	0.00590244	0.00514447
0.59	0.00998347	0.0107784	0.00665011	0.0100039	0.00649253	0.00735314	0.00594541	0.0107218	0.00908764	0.00670647	0.00657499	0.00679602	0.0102127	0.00987728	0.00855426	0.00577107	0.00508878
0.6	0.00984563	0.0106834	0.00658756	0.00987318	0.00640196	0.00725998	0.00586279	0.0105771	0.00901242	0.00661983	0.00649251	0.00674272	0.0101075	0.00967851	0.00851531	0.00564262	0.00501794
0.61	0.00970627	0.0105879	0.00652642	0.00974502	0.00631713	0.00716918	0.0057793	0.0104448	0.00893808	0.00653583	0.00640936	0.00669135	0.0100042	0.00949492	0.00847772	0.00552288	0.00494804
0.62	0.00957244	0.0105051	0.00646577	0.00962136	0.00623717	0.00707905	0.00570543	0.0103506	0.00887066	0.00645955	0.00633495	0.00664794	0.0099027	0.00929445	0.00844719	0.00540642	0.00487424
0.63	0.00944474	0.0104072	0.00640595	0.00949889	0.00616196	0.00699777	0.00563534	0.0102186	0.00880262	0.00637806	0.00626249	0.00661082	0.00980776	0.00911054	0.00841337	0.00529919	0.00479934
0.64	0.00934312	0.0103165	0.00635359	0.00938046	0.00609336	0.00691982	0.00556758	0.0101057	0.00873446	0.00630483	0.00619229	0.0065706	0.00971496	0.00894079	0.00837694	0.00519625	0.00472836
0.65	0.00923775	0.0102273	0.00629679	0.00927197	0.00602548	0.00683719	0.00550319	0.0100001	0.0086672	0.0062292	0.00612747	0.00653068	0.00963397	0.00875456	0.00834833	0.00510034	0.00466417
0.66	0.00914867	0.0101321	0.00624663	0.00916458	0.00596076	0.00675921	0.00544135	0.00989954	0.00860299	0.00615956	0.00606293	0.00648904	0.00954965	0.00860578	0.00831973	0.00500744	0.00459377
0.67	0.00904302	0.0100501	0.00619507	0.00905451	0.0059008	0.00668159	0.00538735	0.00979305	0.00853659	0.0060897	0.00599613	0.00644915	0.0094761	0.00843545	0.00828514	0.0049201	0.0045289
0.68	0.00894844	0.00996362	0.0061454	0.00895161	0.00584376	0.00660598	0.00533496	0.00969694	0.00847322	0.00602489	0.00593622	0.00641535	0.00939598	0.00827947	0.00825822	0.00483622	0.00446335
0.69	0.00885114	0.00987792	0.00610334	0.00885927	0.00578884	0.0065349	0.00528476	0.00960631	0.00841655	0.00595555	0.00588027	0.0063779	0.00932518	0.00811443	0.00822705	0.00475332	0.00441041
0.7	0.00875553	0.00978702	0.00606093	0.00876033	0.00573663	0.00646543	0.00523651	0.00952387	0.00835988	0.00589387	0.0058269	0.00634497	0.00925241	0.0079584	0.00819831	0.00467549	0.00434801
0.71	0.00868468	0.00969025	0.00601568	0.0086646	0.00568753	0.0063993	0.00518648	0.00942572	0.00829957	0.00583334	0.00577517	0.00630716	0.00919146	0.00780171	0.00817252	0.00460452	0.00428013
0.72	0.0086057	0.00959588	0.00597313	0.0085717	0.00564087	0.00632509	0.00514126	0.00931839	0.00823815	0.00577525	0.00572044	0.00627696	0.009128	0.00765271	0.00813339	0.00453664	0.00421602
0.73	0.00853654	0.00950667	0.00593037	0.00848604	0.00559616	0.00625647	0.00510012	0.00924027	0.0081733	0.0057188	0.00566851	0.00624897	0.00905827	0.00749375	0.00810208	0.00447084	0.00415919
0.74	0.00845932	0.00941311	0.0058912	0.00839983	0.0055509	0.00618591	0.00505453	0.0091179	0.00811465	0.00566127	0.0056161	0.00621855	0.00899572	0.0073596	0.00807082	0.00440921	0.00409912
0.75	0.00839143	0.00931447	0.00585166	0.00831131	0.00551157	0.0061095	0.00500913	0.00900913	0.00805337	0.00560688	0.00556476	0.00618891	0.00893703	0.00719741	0.00804179	0.00434909	0.00404823
0.76	0.00831427	0.0092139	0.00581321	0.00822545	0.00547327	0.00604415	0.00496804	0.0089085	0.00799036	0.00554876	0.00551258	0.00615848	0.00888292	0.00705381	0.00801534	0.00429287	0.00399414
0.77	0.00824985	0.00910941	0.0057724	0.00814336	0.00543415	0.00597302	0.00492354	0.00881187	0.0079286	0.00548919	0.0054637	0.00612539	0.0088279	0.00690464	0.0079865	0.00423813	0.00392971
0.78	0.00818207	0.00900288	0.00573756	0.00806136	0.00539951	0.00590315	0.00488569	0.00872153	0.00786832	0.00543428	0.00540901	0.00609297	0.00877732	0.00676984	0.00795915	0.00418347	0.00387792
0.79	0.00810356	0.00889115	0.00570312	0.00798381	0.00536432	0.00583074	0.00485075	0.00862572	0.00780372	0.00538162	0.00535676	0.00605841	0.00871476	0.00662951	0.00793179	0.00413585	0.00381555
0.8	0.0080297	0.00878663	0.00566995	0.00790885	0.00532848	0.00575532	0.00481128	0.00852955	0.00773784	0.00532991	0.00530877	0.00601973	0.00866261	0.00649985	0.00790166	0.00408589	0.00374514
0.81	0.00796299	0.00867149	0.00563619	0.00783597	0.00529565	0.00568486	0.00477164	0.00843097	0.00767471	0.0052807	0.00525893	0.00597591	0.00860979	0.00639236	0.00786672	0.00403612	0.00368543
0.82	0.00789721	0.00855351	0.00560243	0.00776619	0.0052635	0.00561136	0.00472922	0.00832214	0.00760592	0.00522924	0.00520977	0.00593037	0.008556	0.0062647	0.0078277	0.00398849	0.00362313
0.83	0.00783694	0.0084418	0.00556552	0.00769907	0.00523242	0.00553752	0.00468715	0.0082169	0.00753948	0.0051793	0.00515401	0.00588595	0.00850421	0.00614597	0.00779036	0.00394144	0.00355905
0.84	0.00776224	0.00833184	0.00553083	0.007631	0.0052038	0.00546241	0.00464439	0.00809736	0.00747263	0.00512885	0.00509705	0.0058377	0.00844684	0.00603615	0.00775791	0.00389525	0.00349829
0.85	0.00768926	0.00822336	0.00550001	0.00756105	0.00517266	0.00538854	0.00460316	0.00798596	0.00740606	0.00507305	0.00504643	0.005789	0.00838741	0.00591971	0.00771907	0.00384984	0.00343251
0.86	0.00762298	0.00810557	0.00545899	0.00749356	0.00514514	0.00531824	0.00456094	0.00787164	0.00733388	0.00501655	0.0049927	0.00574645	0.00833122	0.0057818	0.00769161	0.00380478	0.00337334
0.87	0.00756182	0.00799117	0.00542639	0.00743337	0.00511859	0.00524888	0.0045198	0.00775928	0.00726398	0.00496188	0.00493663	0.00569766	0.00827928	0.00566261	0.00765805	0.00376345	0.00332181
0.88	0.00749471	0.00788033	0.00538906	0.00736722	0.0050901	0.00517346	0.00447905	0.00765204	0.007199	0.00489842	0.00487997	0.00564692	0.00822306	0.00551927	0.00762262	0.0037224	0.0032606
0.89	0.00742889	0.0077736	0.00534909	0.00730546	0.00506098	0.0050968	0.00444083	0.00753648	0.00713193	0.00483871	0.00482838	0.00559201	0.00816491	0.00541413	0.00758313	0.00368249	0.00319083
0.9	0.00737214	0.0076645	0.00531437	0.00723995	0.00503348	0.00502185	0.00439982	0.00742471	0.00706541	0.00477634	0.00477364	0.00553905	0.00810758	0.00528928	0.00754603	0.00364137	0.00311963
0.91	0.00729921	0.00755335	0.00527701	0.0071815	0.00500463	0.00494795	0.00435989	0.00732328	0.00699805	0.00471691	0.00472022	0.00548268	0.0080523	0.00517011	0.00750589	0.00359851	0.00305698
0.92	0.00724012	0.0074402	0.00523764	0.00712263	0.00497597	0.00487278	0.00431648	0.00719972	0.00693194	0.00465939	0.0046685	0.00543077	0.0079927	0.00505758	0.00746785	0.00356059	0.00299487
0.93	0.0071711	0.00733098	0.00520213	0.00707356	0.00494767	0.00479724	0.00427205	0.00707938	0.00686256	0.00459525	0.0046186	0.00537624	0.00793079	0.00495445	0.00742915	0.0035209	0.00293537
0.94	0.00710175	0.00721819	0.00516453	0.00701513	0.00492006	0.00472069	0.0042266	0.00694761	0.00679393	0.00453245	0.0045659	0.00531985	0.00786749	0.00484769	0.0073919	0.0034772	0.00286749
0.95	0.00704018	0.0071038	0.00512364	0.00696024	0.00489174	0.0046409	0.00417922	0.0068331	0.00672262	0.00446779	0.00451809	0.00526496	0.00780658	0.00474005	0.00735677	0.00343514	0.00279609
0.96	0.00697668	0.00699651	0.00508397	0.00689826	0.00486331	0.00456486	0.00413372	0.00673491	0.00665311	0.00440849	0.00446033	0.00520913	0.0077439	0.00462667	0.00731829	0.0033932	0.00272545
0.97	0.00690344	0.00688596	0.00504369	0.00683991	0.00483616	0.00449122	0.00408845	0.00662547	0.00658276	0.00434129	0.00440996	0.00515472	0.00767849	0.00450749	0.00726803	0.00335052	0.00265158
0.98	0.00683184	0.00677471	0.00500407	0.00678779	0.00480699	0.00441747	0.00404065	0.00650591	0.00651341	0.00427555	0.00435528	0.00509568	0.00761207	0.00439267	0.0072257	0.00331237	0.00257928
0.99	0.00676482	0.00667118	0.00496268	0.00672728	0.00477949	0.0043362	0.00399225	0.00638039	0.00644019	0.00420871	0.00430471	0.00503139	0.00754961	0.00427891	0.00718328	0.00326935	0.00250402

## Sheet: EGFR_PI(4,5)P2_05min
	cell#1	cell#2	cell#3	cell#4	cell#5	cell#6	cell#7	cell#8	cell#9	cell#10
0.01	0.00016965	0.00012115	0.00019014	-2.9e-05	0.00014004	0.00060312	0.0002137	0.00056146	0.00017481	5.81e-05
0.02	0.00030875	0.00026095	0.00048664	-9.83e-06	0.00034033	0.00112856	0.00033901	0.00108765	0.00031451	0.00020931
0.03	0.0004132	0.00044658	0.00073852	5.33e-05	0.00056475	0.00168003	0.00064552	0.00164499	0.00049417	0.00030745
0.04	0.00057103	0.00056472	0.00100052	0.00014706	0.00080906	0.00223605	0.00087977	0.00223224	0.00067938	0.00039488
0.05	0.00065473	0.00069325	0.00121992	0.00010327	0.00100619	0.0028313	0.00109739	0.00283403	0.00087102	0.00044742
0.06	0.00075883	0.00079688	0.00151126	0.00021716	0.0012498	0.00334986	0.00121418	0.0033829	0.00106839	0.00048656
0.07	0.00089124	0.00091103	0.00174798	0.00030109	0.00144791	0.00388002	0.00145008	0.0039855	0.00123987	0.00050931
0.08	0.00102729	0.00103148	0.00198796	0.00036038	0.00162724	0.00438366	0.00164962	0.00446827	0.00142905	0.00060829
0.09	0.00115543	0.00115177	0.00221116	0.00043701	0.00183636	0.00487375	0.00181515	0.0049686	0.00160242	0.00063873
0.1	0.00129596	0.00125386	0.00239569	0.00049583	0.00204214	0.00526488	0.00204754	0.00545387	0.00174763	0.00071524
0.11	0.00137106	0.00135188	0.00261452	0.0005751	0.00223498	0.00561081	0.00223236	0.00594254	0.00191088	0.00073905
0.12	0.00143468	0.00144633	0.0027734	0.00068092	0.00239223	0.00600586	0.00243264	0.00637252	0.00201157	0.00080653
0.13	0.00152594	0.00155084	0.00292984	0.00077038	0.00263051	0.00637136	0.00258393	0.00677514	0.00213412	0.00089195
0.14	0.00163148	0.00166985	0.00306785	0.00087484	0.00278844	0.00668325	0.00277149	0.00713044	0.0022589	0.00094866
0.15	0.00171247	0.00175151	0.00321614	0.00101386	0.00290389	0.00692379	0.00285793	0.00746731	0.00237914	0.00099845
0.16	0.00180389	0.00185839	0.00337002	0.00115014	0.00305122	0.0071919	0.00304875	0.00780425	0.00247405	0.00106753
0.17	0.00185601	0.00194093	0.00348852	0.00127894	0.00317824	0.00743263	0.00321951	0.00810802	0.00255311	0.00114555
0.18	0.00196181	0.00200827	0.00361429	0.00142472	0.00331169	0.00763584	0.00341058	0.00836622	0.00263896	0.00121401
0.19	0.00205696	0.00207793	0.00373707	0.00154906	0.00342758	0.00779892	0.00356761	0.00859809	0.00272799	0.00124919
0.2	0.00213828	0.00213781	0.00382527	0.00166761	0.00356188	0.00795989	0.00369406	0.00884843	0.00281682	0.00128226
0.21	0.00222575	0.00219857	0.00391952	0.00181631	0.00367101	0.00810489	0.00385523	0.00907413	0.00289608	0.00135267
0.22	0.00229925	0.00226038	0.00400967	0.0019533	0.00379551	0.00820578	0.00403174	0.00926956	0.00295635	0.00138409
0.23	0.00237381	0.00232934	0.00409297	0.00205619	0.00388715	0.00831604	0.00414498	0.00941772	0.00300116	0.00142826
0.24	0.00246317	0.00238543	0.00414407	0.00220709	0.00399253	0.00840478	0.00429809	0.00955451	0.00303517	0.00146452
0.25	0.0025146	0.0024192	0.00422715	0.00233378	0.00404109	0.00845738	0.00445721	0.00971398	0.00305434	0.00149154
0.26	0.00257273	0.00245454	0.00425083	0.00242953	0.00410953	0.00850687	0.00458402	0.00985409	0.00310224	0.00152133
0.27	0.00262901	0.00248774	0.00431158	0.00253821	0.0041964	0.00854277	0.00471091	0.00995743	0.00313401	0.00153594
0.28	0.00267362	0.0025422	0.00437635	0.0026322	0.00425669	0.00856356	0.00485091	0.010111	0.00315875	0.00156541
0.29	0.00269852	0.00261072	0.00440256	0.00275938	0.00429382	0.00857016	0.00501557	0.0102161	0.0031952	0.00156939
0.3	0.00271285	0.00266797	0.00442691	0.0028525	0.00436562	0.00857041	0.0051151	0.0103249	0.003218	0.00158862
0.31	0.00276099	0.00272051	0.00443758	0.00294631	0.00445626	0.00856344	0.00523903	0.0104258	0.00322739	0.00163041
0.32	0.00277933	0.00278438	0.00444936	0.00302463	0.00453247	0.00851432	0.00536374	0.0105451	0.00325729	0.00165003
0.33	0.0027943	0.00283088	0.00444269	0.00311909	0.00459231	0.00846408	0.00546194	0.0106623	0.00327959	0.00167521
0.34	0.00279799	0.00285343	0.00444341	0.00320891	0.00462877	0.00841981	0.00557481	0.0107587	0.00328375	0.00168217
0.35	0.00280761	0.00287568	0.00443314	0.00328859	0.00467795	0.00834327	0.0056754	0.0109003	0.00329969	0.00169401
0.36	0.0028313	0.00289462	0.00444021	0.00336866	0.00471417	0.00827019	0.00575568	0.0109961	0.00332401	0.00170612
0.37	0.00284471	0.00291399	0.00441417	0.00340986	0.00475385	0.00820086	0.00581041	0.0110861	0.00332706	0.0017366
0.38	0.00285436	0.00293274	0.00439933	0.00347371	0.00479049	0.00811669	0.00589541	0.0111857	0.00336535	0.00177105
0.39	0.00284936	0.0029492	0.00437916	0.00353781	0.00481822	0.00802592	0.00594255	0.0112864	0.00338189	0.00178865
0.4	0.00285638	0.00296243	0.00436045	0.0035882	0.0048476	0.00791503	0.00597116	0.0113806	0.00340875	0.0018004
0.41	0.00285693	0.00296773	0.00436034	0.00364252	0.00485872	0.00782585	0.00601796	0.0114716	0.00343421	0.00183094
0.42	0.00286589	0.00295874	0.00437328	0.0037039	0.00485527	0.00774481	0.00602407	0.0115631	0.00347007	0.001848
0.43	0.00285704	0.00296231	0.00439101	0.0037504	0.00488295	0.00763803	0.00606093	0.0116579	0.00350009	0.00185986
0.44	0.00285344	0.00294986	0.00441231	0.0037762	0.00487204	0.00754099	0.00607233	0.0117216	0.00354214	0.00190069
0.45	0.00283656	0.00293668	0.00442066	0.00382693	0.00487826	0.00744557	0.00610387	0.0117844	0.00357987	0.00194609
0.46	0.00282464	0.00291957	0.0044204	0.00385802	0.00490205	0.00735338	0.00611892	0.0118318	0.00361879	0.00196903
0.47	0.00279949	0.00290866	0.00443328	0.00386718	0.00490016	0.0072712	0.00612318	0.0118365	0.00363353	0.0019907
0.48	0.00276679	0.00289502	0.0044494	0.00387742	0.0048988	0.00718359	0.00613058	0.0118569	0.00365475	0.00202901
0.49	0.00274486	0.0028809	0.00446037	0.00391178	0.00491653	0.00708968	0.00613242	0.0118853	0.00368387	0.00207378
0.5	0.00271923	0.00285845	0.00447311	0.00393957	0.00492734	0.00699331	0.0061223	0.0119034	0.0037118	0.00211165
0.51	0.00268835	0.00283816	0.00449519	0.00395991	0.00493241	0.00694407	0.00611238	0.0119088	0.00373325	0.00215133
0.52	0.00263871	0.00281483	0.00450945	0.00397903	0.00494433	0.00685095	0.00609388	0.0119228	0.00374699	0.00219314
0.53	0.00260956	0.00278181	0.00452083	0.00398487	0.00493879	0.0067615	0.00608626	0.0119033	0.00377944	0.00222212
0.54	0.00258648	0.00273935	0.00452175	0.00398494	0.00491812	0.00668254	0.00610174	0.0118929	0.00380268	0.00225105
0.55	0.0025512	0.00269986	0.00451191	0.00399312	0.00491043	0.00659312	0.00609783	0.0118788	0.00383441	0.00227388
0.56	0.00251821	0.0026557	0.00451714	0.00398464	0.00489235	0.0064956	0.0060905	0.0118408	0.00385281	0.00229569
0.57	0.00250026	0.00260095	0.00451893	0.00399976	0.00487643	0.00641252	0.00609122	0.0118029	0.00388814	0.00233036
0.58	0.00247328	0.00254788	0.0045124	0.00401078	0.00486425	0.0063183	0.00609591	0.0117543	0.00392942	0.00236948
0.59	0.00245804	0.0024895	0.00451033	0.0040106	0.00485745	0.00621348	0.00611543	0.011698	0.0039657	0.00240745
0.6	0.00243815	0.00242765	0.00451463	0.00402224	0.00483537	0.00610544	0.0061232	0.0116382	0.0039985	0.00244873
0.61	0.00242859	0.00237961	0.00450688	0.00402102	0.00478641	0.00600119	0.00614165	0.011567	0.00403676	0.00251118
0.62	0.00242645	0.00232497	0.00449547	0.00399593	0.00474257	0.0059014	0.00618525	0.0114807	0.00408954	0.00255621
0.63	0.0024332	0.00226214	0.00450051	0.00398826	0.00468352	0.00580376	0.00618438	0.011406	0.00414372	0.00260304
0.64	0.00244196	0.00220442	0.0044997	0.00398764	0.00464077	0.00568774	0.00620058	0.0113276	0.00419452	0.0026354
0.65	0.00244012	0.00214489	0.00448399	0.0039651	0.00458901	0.0055652	0.00622887	0.0112402	0.00424497	0.00267796
0.66	0.00244482	0.00208364	0.00447368	0.00393814	0.00455672	0.00546334	0.00623377	0.0111412	0.00429088	0.00270686
0.67	0.00243863	0.00203875	0.00443586	0.00392838	0.00452004	0.00537528	0.00626235	0.0110415	0.00433658	0.00274671
0.68	0.00244553	0.00200226	0.00440133	0.00391119	0.00448793	0.00526995	0.00628913	0.0109303	0.0043756	0.00277338
0.69	0.00246249	0.00196336	0.00436944	0.00387825	0.00445213	0.00517283	0.00631297	0.0108208	0.00442687	0.00279891
0.7	0.00246879	0.00192291	0.00433507	0.00385545	0.00442563	0.00506106	0.00632574	0.0106937	0.0044694	0.0028289
0.71	0.00247609	0.00189089	0.00430275	0.00383381	0.0043791	0.00496106	0.00635024	0.0105704	0.00451584	0.00286638
0.72	0.00247902	0.00185463	0.00426961	0.00382066	0.00434305	0.00487821	0.00633684	0.0104484	0.00456167	0.00288597
0.73	0.00249319	0.00181344	0.00424363	0.0038004	0.00431271	0.00479609	0.00630553	0.0103316	0.00459645	0.0029063
0.74	0.00251198	0.00177804	0.00420235	0.0037711	0.00428571	0.00469935	0.00625087	0.0102213	0.0046366	0.00291082
0.75	0.00253415	0.00174987	0.00415225	0.00375818	0.00424097	0.00460102	0.00619191	0.0101115	0.0046784	0.00292999
0.76	0.0025399	0.00172294	0.00411631	0.00374579	0.00423283	0.00450638	0.00615047	0.0100054	0.00471888	0.0029468
0.77	0.00253801	0.00169805	0.00407514	0.00373629	0.00419072	0.0044089	0.00606173	0.00988453	0.00475227	0.0029518
0.78	0.00254847	0.00168341	0.00400784	0.00374	0.00417515	0.00432123	0.00599982	0.00976285	0.00478921	0.00295626
0.79	0.00254492	0.00167487	0.00395358	0.00372556	0.00415029	0.00422998	0.0059338	0.0096429	0.0048334	0.00296112
0.8	0.00255235	0.00165561	0.00390442	0.00370924	0.00412806	0.00412256	0.00586252	0.00954301	0.00487729	0.00295898
0.81	0.00255948	0.00165638	0.00385616	0.00368544	0.00408727	0.00401141	0.00576478	0.00945575	0.00491618	0.00297045
0.82	0.00256065	0.00165719	0.00381519	0.00366741	0.00404755	0.00390968	0.00566416	0.00936344	0.00494844	0.00296297
0.83	0.00255173	0.00165995	0.00374769	0.00364802	0.00402921	0.00380644	0.00555835	0.00927732	0.0049937	0.00296197
0.84	0.00255479	0.00166009	0.00369643	0.00362959	0.00400221	0.00372178	0.00544537	0.00921611	0.00502449	0.00295271
0.85	0.00254384	0.00166872	0.0036627	0.00360327	0.00397074	0.00361546	0.00530925	0.00915283	0.00505729	0.00293297
0.86	0.00253923	0.00169154	0.00361713	0.00357062	0.00393515	0.00351498	0.00519883	0.00910163	0.00509283	0.00292926
0.87	0.00253909	0.0017101	0.00358467	0.0035494	0.0039231	0.00342592	0.00504958	0.00904216	0.0051208	0.00291805
0.88	0.00254389	0.00174106	0.00354187	0.00351185	0.00387861	0.00332741	0.00490801	0.0090102	0.00515167	0.00291119
0.89	0.00254958	0.0017627	0.00348603	0.00348803	0.00384109	0.00324603	0.00477874	0.00897239	0.00517994	0.00287466
0.9	0.00253564	0.00178889	0.00342157	0.00346961	0.00379759	0.00316159	0.00462318	0.00894325	0.00520792	0.0028472
0.91	0.00253027	0.00181508	0.00336819	0.00343415	0.00374667	0.00308526	0.00449561	0.00890913	0.00522173	0.00281914
0.92	0.00251903	0.00185007	0.0033142	0.0034068	0.00369526	0.00299874	0.00438771	0.00886083	0.00523112	0.00280035
0.93	0.00250367	0.00188112	0.00326265	0.00335101	0.00364835	0.00290198	0.00425588	0.00883556	0.00525313	0.00275249
0.94	0.00248212	0.00192063	0.00322582	0.00330276	0.00359398	0.00280471	0.004129	0.0087995	0.00527242	0.00271588
0.95	0.00244726	0.00195037	0.00316676	0.00326179	0.0035413	0.00272549	0.00399691	0.00875696	0.00529582	0.00267789
0.96	0.00240688	0.00198049	0.00311861	0.00321633	0.00346705	0.0026263	0.00387671	0.00872433	0.00531352	0.00264934
0.97	0.00235882	0.0020049	0.00307545	0.00317749	0.00340287	0.00251147	0.00373599	0.00867763	0.00533029	0.00260617
0.98	0.00230783	0.00203428	0.00302766	0.00312785	0.00333342	0.00239774	0.00360329	0.00863006	0.00535635	0.00255391
0.99	0.00225428	0.00205806	0.00297256	0.00308924	0.00326364	0.00228341	0.00348206	0.00859291	0.00538784	0.00250409

## Sheet: EGFR_PI(4,5)P2_2min
	cell#1	cell#2	cell#3	cell#4	cell#5	cell#6	cell#7	cell#8	cell#9	cell#10	cell#11	cell#12	cell#13	cell#14	cell#15	cell#16	cell#17	cell#18	cell#19	cell#20
0.01	6.67755e-06	3.81923e-05	0.00020791	0.000164894	0.000181502	0.000186364	0.000202484	8.45285e-05	0.000150066	0.000202611	0.000363038	2.44719e-05	0.000404914	0.000103672	0.000136338	0.000134535	0.000107022	7.16274e-05	0.000336252	9.15229e-05
0.02	6.94306e-06	8.91851e-05	0.000434366	0.000354663	0.000363558	0.000336286	0.000511835	0.000237466	0.000272621	0.000406471	0.000701452	3.41743e-05	0.000777305	0.000232355	0.000332413	0.000275557	0.000245017	0.000174011	0.000653233	0.000197024
0.03	1.77624e-05	0.000144497	0.000656557	0.000525314	0.000534906	0.000527155	0.000763084	0.000378837	0.000408891	0.000578515	0.00103457	6.1608e-05	0.00117377	0.000352415	0.000521119	0.000388278	0.000359602	0.000251641	0.000943517	0.000303415
0.04	7.66907e-06	0.000194282	0.000860729	0.000695944	0.000713582	0.000705088	0.0010294	0.000507767	0.000527253	0.000748116	0.00132764	6.05836e-05	0.00155048	0.000480257	0.000701264	0.00050119	0.0004891	0.000327112	0.00123045	0.000380856
0.05	1.22718e-05	0.000235784	0.00107198	0.000865661	0.000853283	0.000859231	0.00125952	0.000640239	0.000651674	0.000931706	0.00162364	6.85894e-05	0.00192721	0.000567335	0.000845557	0.000617823	0.000603584	0.000394844	0.00150567	0.000460988
0.06	2.48828e-06	0.000280833	0.0012668	0.00101735	0.00100017	0.00100792	0.00147953	0.000772654	0.000765071	0.00109881	0.00192847	8.38934e-05	0.00229293	0.000685805	0.00100568	0.000739408	0.000700898	0.000468558	0.00176309	0.000542658
0.07	-9.61975e-07	0.000310562	0.00145177	0.00118149	0.00115851	0.0011711	0.0017262	0.000881862	0.000876483	0.00124706	0.00217643	0.000111099	0.00264022	0.000767875	0.00114887	0.000851437	0.000795902	0.000546906	0.00200866	0.000622395
0.08	-7.58624e-06	0.000336175	0.00161577	0.00132323	0.00131935	0.00131366	0.00196078	0.000983524	0.000970153	0.00136794	0.0023946	0.000113209	0.00298673	0.00085978	0.00128525	0.000951219	0.000878105	0.000616165	0.00224251	0.000703568
0.09	-1.1752e-05	0.000368505	0.00177336	0.00146315	0.00148178	0.0014465	0.00217744	0.00107658	0.00105778	0.0014909	0.00262612	0.00012222	0.0032846	0.000933526	0.00140098	0.00104773	0.000956945	0.000671912	0.00245367	0.00077928
0.1	-2.86773e-05	0.000393926	0.00192771	0.00159138	0.00162149	0.00157421	0.00236828	0.00116754	0.00113743	0.00161334	0.00282803	0.000122951	0.00359032	0.00100643	0.00150502	0.00115294	0.00102122	0.000727627	0.00265617	0.000848136
0.11	-3.7245e-05	0.000420446	0.00206608	0.00170427	0.00173547	0.00170753	0.00257203	0.00125317	0.00121204	0.00171993	0.00301266	0.000139949	0.00386728	0.00107171	0.00159697	0.0012505	0.00108517	0.00078858	0.00283113	0.000911218
0.12	-4.50538e-05	0.000441467	0.0021867	0.00181223	0.00184437	0.00181745	0.00274527	0.00135599	0.0012797	0.00181043	0.00318521	0.000151059	0.00413345	0.00116107	0.00170406	0.00134533	0.00113599	0.00084675	0.00299411	0.000963464
0.13	-5.69916e-05	0.000469007	0.00230828	0.0019162	0.00193767	0.00192516	0.00292936	0.00144072	0.00133113	0.00189166	0.00331893	0.000160931	0.00437414	0.00123753	0.00178215	0.00142629	0.00118262	0.000908628	0.00313069	0.00101561
0.14	-7.49164e-05	0.000499752	0.00242292	0.00201768	0.00202012	0.00201806	0.00309122	0.00150437	0.00138055	0.00197412	0.00345832	0.000178695	0.00459932	0.00130946	0.0018797	0.00151702	0.00122084	0.000967632	0.00325931	0.00107055
0.15	-0.000101711	0.000521688	0.0025312	0.00210411	0.00211096	0.0021087	0.0032363	0.00159029	0.00143305	0.00204492	0.00359267	0.000189105	0.00480998	0.00138771	0.00197732	0.00160299	0.00125514	0.00102354	0.00337104	0.00111119
0.16	-0.000112267	0.00054616	0.00262216	0.00217898	0.00219634	0.00219792	0.00335741	0.00167151	0.00146654	0.00211655	0.0036972	0.000205867	0.00500131	0.0014667	0.00204877	0.00168021	0.00128458	0.00107708	0.00347224	0.00114333
0.17	-0.000123926	0.000570751	0.00270308	0.00224969	0.00226955	0.00227954	0.00348411	0.00174125	0.00148983	0.002168	0.00381159	0.000227423	0.00518175	0.0015516	0.00212954	0.0017632	0.00129931	0.00113084	0.00356134	0.00117564
0.18	-0.000139439	0.000592751	0.00277111	0.00231069	0.00233335	0.00235681	0.00359823	0.00179808	0.00152229	0.00222708	0.00392411	0.000237001	0.00534373	0.00162847	0.00219415	0.00183374	0.00130541	0.00118278	0.00363165	0.00120336
0.19	-0.00016141	0.000609654	0.00283671	0.00237126	0.00240205	0.00242638	0.00370547	0.00186726	0.00153693	0.00228421	0.004019	0.000238914	0.00548996	0.00170232	0.00227295	0.00189649	0.00131256	0.00122713	0.00370041	0.00123651
0.2	-0.000169026	0.000627828	0.00288955	0.0024291	0.00247059	0.00247837	0.00379937	0.00192786	0.00154912	0.00234236	0.00411374	0.000254187	0.00562584	0.00176084	0.0023355	0.0019603	0.00131645	0.001277	0.00374873	0.00125993
0.21	-0.000196918	0.000640354	0.00294917	0.00248081	0.00252764	0.00252836	0.00387854	0.00199085	0.00155859	0.00240312	0.00422286	0.000265515	0.00573937	0.00181425	0.00239583	0.00203138	0.00132086	0.00131896	0.00379608	0.00128556
0.22	-0.000207211	0.000655615	0.00299433	0.00251666	0.00257125	0.00257311	0.00395788	0.00206123	0.00157044	0.00247015	0.00431393	0.000277693	0.00584945	0.00187193	0.00244337	0.00209539	0.00131663	0.00136132	0.00382075	0.00130627
0.23	-0.000216896	0.000668156	0.00303084	0.00255262	0.00261367	0.00261729	0.00402874	0.00211173	0.00157462	0.00253145	0.00440199	0.000297518	0.00593748	0.0019413	0.00249982	0.00215327	0.00130442	0.00140579	0.00384124	0.00132532
0.24	-0.000213974	0.000684359	0.0030637	0.00258939	0.00266218	0.00265716	0.00410731	0.00215578	0.00158148	0.00258091	0.00447225	0.000316665	0.00600881	0.00198537	0.00254632	0.00221363	0.00129437	0.00145019	0.00386208	0.00133892
0.25	-0.000211387	0.000702025	0.00308713	0.0026223	0.00270863	0.00268982	0.00417349	0.00219536	0.00157881	0.00261901	0.0045361	0.000337193	0.00608926	0.00204362	0.00260042	0.0022629	0.00127729	0.00148927	0.00387259	0.00134771
0.26	-0.00020704	0.00071371	0.00311304	0.00264868	0.00274074	0.00272305	0.00423471	0.00224654	0.00157087	0.00265819	0.00459496	0.00035476	0.00616059	0.00208286	0.0026428	0.00231175	0.00126233	0.00153187	0.00386971	0.00135765
0.27	-0.000200642	0.000724461	0.00313735	0.00267583	0.00276759	0.00275349	0.00428236	0.00227692	0.00156227	0.00270029	0.00463572	0.000373774	0.00622894	0.00211787	0.00268473	0.00234766	0.00124165	0.00157159	0.00387402	0.00136567
0.28	-0.00020193	0.000730565	0.00315408	0.00269918	0.00278198	0.00278366	0.00432588	0.00231424	0.00155328	0.00273735	0.00466439	0.000394704	0.00628745	0.00215718	0.00272789	0.00239242	0.00122054	0.00161403	0.00387395	0.00137854
0.29	-0.000200399	0.000741133	0.00317169	0.00272123	0.00280316	0.00281676	0.00436474	0.00235196	0.00153842	0.00276604	0.00468122	0.00042635	0.00634246	0.00219272	0.00276114	0.00242373	0.00120275	0.00165532	0.00386598	0.00138059
0.3	-0.000198758	0.000751287	0.00317711	0.00273783	0.00282096	0.00283819	0.0043998	0.0023684	0.00151701	0.00280397	0.00469657	0.000454595	0.00639502	0.00223019	0.00279409	0.00245177	0.00117833	0.00168854	0.00385146	0.00138892
0.31	-0.000192183	0.000764181	0.00317928	0.0027593	0.00285233	0.00285989	0.00443771	0.00239713	0.0014919	0.00284071	0.00470606	0.000474834	0.0064357	0.00225939	0.00283111	0.00247895	0.00115764	0.0017297	0.0038365	0.00139104
0.32	-0.000178578	0.000774968	0.00318041	0.00276808	0.00285204	0.00287517	0.00447116	0.00242147	0.00146901	0.00287388	0.0047173	0.000490855	0.00646791	0.00229762	0.00286066	0.00250675	0.00113987	0.00176615	0.00381954	0.00140222
0.33	-0.000164627	0.000781208	0.00317738	0.00278851	0.0028628	0.00289516	0.00450691	0.00243978	0.00144981	0.00290692	0.00471504	0.000505396	0.00649455	0.0023309	0.00289418	0.0025266	0.00111805	0.00179745	0.00379706	0.00141557
0.34	-0.000141699	0.000786854	0.00318052	0.00280077	0.00287077	0.00290517	0.00453014	0.00245237	0.00143134	0.00294125	0.00470174	0.000529145	0.00651711	0.00237239	0.00292142	0.00254376	0.00110123	0.0018332	0.00377256	0.00142862
0.35	-0.000124704	0.000792942	0.00317101	0.0028097	0.00286656	0.00292073	0.00455757	0.00246737	0.00141385	0.00297552	0.00468583	0.000553833	0.00653627	0.00242236	0.0029527	0.00255257	0.0010786	0.00186352	0.00374541	0.00144112
0.36	-0.000111032	0.000796668	0.00316462	0.00282097	0.00286472	0.00293584	0.0045806	0.00247296	0.00138808	0.00300156	0.00467034	0.000577923	0.00656723	0.00245601	0.002975	0.00255664	0.00105815	0.00189711	0.00371551	0.00144763
0.37	-8.07216e-05	0.00080701	0.0031669	0.00282878	0.00285219	0.00294575	0.00459402	0.002485	0.00136315	0.00302329	0.00465605	0.000603002	0.00658798	0.0024877	0.00299355	0.00255562	0.00104267	0.00192901	0.00368487	0.00145915
0.38	-5.40112e-05	0.000819161	0.00315825	0.00284247	0.00284474	0.0029535	0.0046041	0.00249827	0.00133583	0.00304694	0.00463575	0.000630421	0.0066086	0.0025137	0.00301264	0.00255247	0.00102729	0.00196141	0.0036586	0.00147993
0.39	-2.72688e-05	0.000828812	0.00315511	0.00285638	0.00282964	0.00296362	0.00460286	0.00251603	0.00131114	0.00305157	0.00462527	0.000661277	0.00662892	0.00253622	0.00302333	0.00254424	0.00101889	0.00198982	0.00363351	0.00149467
0.4	-1.7727e-07	0.000836652	0.00315273	0.00286599	0.0028195	0.00296905	0.00460119	0.00251512	0.00128304	0.00306706	0.0046113	0.000689816	0.00663864	0.00255764	0.00303791	0.00253377	0.00100477	0.00201784	0.00359683	0.00151251
0.41	2.77243e-05	0.000846009	0.00314918	0.00287327	0.00280995	0.00297342	0.00460334	0.00252009	0.0012547	0.00307675	0.00459944	0.000718605	0.00665221	0.00258197	0.00305548	0.00252017	0.000991817	0.00204373	0.00356618	0.0015314
0.42	5.02289e-05	0.000855209	0.00314959	0.00288394	0.00279714	0.00297757	0.0046107	0.00252088	0.00123137	0.00309045	0.00458001	0.00074684	0.0066694	0.00259853	0.00307178	0.00250416	0.000976462	0.00206731	0.00353398	0.00154406
0.43	8.03901e-05	0.000863633	0.00314109	0.00289704	0.00279456	0.00297253	0.00461517	0.00251625	0.00120125	0.00310539	0.00457771	0.000770843	0.0066736	0.00261794	0.00308653	0.00248579	0.00096342	0.00209886	0.00350568	0.00156257
0.44	0.000113028	0.00086399	0.00314053	0.00290803	0.00279228	0.00297641	0.00460419	0.00251863	0.00117749	0.00311265	0.00455985	0.000796457	0.00668241	0.00264451	0.00310131	0.00246661	0.000949427	0.00212649	0.00347675	0.0015811
0.45	0.000139752	0.000867871	0.00313631	0.00291578	0.00278215	0.0029795	0.00459947	0.0025208	0.00114922	0.00312635	0.0045367	0.000829793	0.00668649	0.00265687	0.00312044	0.00244157	0.000939279	0.00214777	0.00344848	0.00159197
0.46	0.000176489	0.000870674	0.00313632	0.00291948	0.00277199	0.00298057	0.00459746	0.0025194	0.00112549	0.00313777	0.00452078	0.00085794	0.00670411	0.0026737	0.00313911	0.00241907	0.000928816	0.00217138	0.00341952	0.00160474
0.47	0.000207485	0.00087291	0.00313553	0.00292929	0.00275205	0.00297821	0.0045846	0.00250901	0.00109458	0.00314738	0.00450793	0.000885887	0.00671566	0.00268289	0.00316276	0.00239101	0.000921168	0.00219578	0.00339349	0.00162235
0.48	0.00024084	0.000876935	0.00313762	0.00294175	0.00273984	0.00297296	0.0045834	0.00249904	0.0010711	0.00315682	0.00449829	0.000912602	0.0067234	0.00269334	0.00317461	0.00237061	0.000915014	0.0022208	0.00336576	0.00164878
0.49	0.000272796	0.000881558	0.00313199	0.00295351	0.0027231	0.00296617	0.00456761	0.00248545	0.00105392	0.0031534	0.00448973	0.00094501	0.00674211	0.00270592	0.00318784	0.00234623	0.000909088	0.00224789	0.00333906	0.00166584
0.5	0.000304322	0.000883643	0.00312893	0.00296949	0.00271297	0.00295468	0.00456744	0.00247166	0.00103427	0.00317124	0.0044846	0.000979042	0.0067589	0.00272743	0.00320034	0.00231914	0.000899643	0.00227165	0.00331811	0.00168478
0.51	0.000339025	0.000893547	0.00312632	0.00297801	0.00269934	0.00294995	0.00456171	0.00245589	0.00101084	0.00317855	0.00448729	0.00101765	0.00677397	0.00273585	0.00321194	0.00229373	0.00089911	0.00229711	0.00329772	0.00170229
0.52	0.000371935	0.000896254	0.00311696	0.00299178	0.002697	0.00294155	0.00455047	0.00244756	0.000988562	0.0031915	0.00449346	0.00104905	0.00679063	0.00274607	0.00323291	0.0022612	0.000890249	0.00232243	0.00327438	0.00171937
0.53	0.000406564	0.000897699	0.00310942	0.00300973	0.00268904	0.00293567	0.00454391	0.00242683	0.00097045	0.00318991	0.00449092	0.00108361	0.00680381	0.00274688	0.00324788	0.00223286	0.000885879	0.00234762	0.00325157	0.00173001
0.54	0.000443107	0.00090117	0.00309692	0.00302455	0.00267557	0.00292781	0.00453005	0.00241262	0.000950405	0.00319559	0.00449563	0.00111914	0.00682322	0.00274347	0.00326982	0.00220873	0.00088478	0.00236885	0.00323078	0.00174625
0.55	0.00048096	0.000897446	0.00309097	0.00303513	0.00266056	0.00291744	0.00452223	0.00239079	0.000929428	0.0032038	0.00449726	0.00115662	0.00684554	0.00274307	0.00329301	0.00217668	0.000883373	0.00239353	0.00321018	0.00176153
0.56	0.000515167	0.000898117	0.0030827	0.00305331	0.0026557	0.00290516	0.00450721	0.00237195	0.000910132	0.00320737	0.004497	0.00118799	0.00686228	0.00273974	0.00330287	0.00214773	0.000884051	0.00241678	0.00319198	0.00178029
0.57	0.000549397	0.000898225	0.00307767	0.00307104	0.00263339	0.00289612	0.0044963	0.00235336	0.000893981	0.00320684	0.00451309	0.00122172	0.00688574	0.00274097	0.00332216	0.00212704	0.000883855	0.00243913	0.00317181	0.00179545
0.58	0.000583972	0.000901201	0.00307046	0.00309355	0.00261559	0.00288666	0.00448072	0.00232991	0.000872966	0.00321007	0.00452534	0.00124978	0.00690146	0.00274651	0.00334367	0.00210412	0.000885553	0.0024657	0.00315566	0.00181072
0.59	0.000624	0.000903534	0.00306271	0.00310889	0.00259822	0.00286907	0.00446393	0.00230914	0.000855028	0.00322049	0.00455086	0.0012791	0.00691933	0.00275333	0.00336877	0.00208027	0.000889875	0.00249185	0.00313879	0.00182206
0.6	0.000661393	0.000902909	0.00305501	0.00312068	0.00258121	0.00285048	0.00444897	0.00227747	0.000844223	0.00322083	0.00457747	0.00131103	0.00694051	0.00276028	0.00338826	0.00205843	0.000890957	0.00251422	0.00312531	0.00183378
0.61	0.000702776	0.000908003	0.00304801	0.00313726	0.00255991	0.00282926	0.0044338	0.00225428	0.000831064	0.00322817	0.00460322	0.001341	0.00696619	0.00276353	0.00340398	0.00203422	0.000889406	0.00253901	0.00311203	0.00184188
0.62	0.000736388	0.000914182	0.00303734	0.00316293	0.00253552	0.00281058	0.00441929	0.00223085	0.000817917	0.00322912	0.00462558	0.00137015	0.00699018	0.00277004	0.00342108	0.00201319	0.000890923	0.00255939	0.00309802	0.00185082
0.63	0.000775312	0.000915502	0.003028	0.00318109	0.00250766	0.00278546	0.00439844	0.00220575	0.000804031	0.00323226	0.00465534	0.00140143	0.00701898	0.00277319	0.00343623	0.0019946	0.00089092	0.0025765	0.00308569	0.00185763
0.64	0.000810332	0.000914959	0.00301574	0.00320582	0.00247995	0.00276379	0.00438911	0.00217888	0.000786734	0.00323204	0.00468354	0.00143072	0.00704333	0.00278019	0.00345126	0.00197523	0.00089352	0.00259965	0.00307965	0.00186244
0.65	0.000849521	0.000919065	0.00300531	0.00322773	0.00244098	0.00273943	0.00436293	0.00215401	0.000775374	0.00322542	0.00471045	0.00145594	0.00707113	0.00278344	0.00346774	0.00195802	0.000892408	0.00261731	0.00306748	0.00187432
0.66	0.000889855	0.000919063	0.00299066	0.0032532	0.00241737	0.00271986	0.00434617	0.00211976	0.000759584	0.00322577	0.00473455	0.00148035	0.00709125	0.0027811	0.00348383	0.00194709	0.000891513	0.00263373	0.00306302	0.00188354
0.67	0.00092561	0.000923763	0.0029788	0.00327274	0.00238597	0.00269524	0.0043297	0.00208814	0.000744079	0.00322185	0.00475949	0.00150507	0.00710929	0.00278937	0.00350513	0.00193463	0.000890161	0.00264982	0.00305376	0.00188681
0.68	0.000973216	0.000920164	0.00296294	0.00329285	0.00235627	0.00267666	0.00431063	0.00205304	0.000731797	0.00321415	0.00478764	0.00153201	0.00713448	0.00279818	0.00352014	0.00192649	0.000891629	0.00266622	0.0030483	0.00189045
0.69	0.0010145	0.000920865	0.00294602	0.00331372	0.00232005	0.0026492	0.00428704	0.00202539	0.000718565	0.00321294	0.00480901	0.00155867	0.00715348	0.00281085	0.00353867	0.0019197	0.000891595	0.00268524	0.00304472	0.00189245
0.7	0.0010633	0.000922736	0.00293319	0.00333022	0.00228214	0.00261944	0.00426684	0.00199385	0.000706984	0.00320731	0.00483681	0.00158254	0.00716785	0.00282236	0.00355714	0.00191156	0.000887808	0.00269856	0.00304074	0.00189887
0.71	0.00110596	0.000917402	0.00291662	0.00334569	0.00224983	0.00259337	0.00423636	0.00195862	0.000691896	0.00320327	0.00487049	0.00160434	0.00718283	0.00284208	0.0035726	0.00190908	0.000889325	0.00270892	0.00303248	0.00190284
0.72	0.00115245	0.000915666	0.00289401	0.00336584	0.002212	0.00257025	0.00420876	0.00192543	0.000672737	0.00319933	0.00490607	0.00162732	0.00719587	0.00284813	0.00358626	0.00190402	0.000889228	0.00272374	0.00302571	0.00190446
0.73	0.00119216	0.000915191	0.00287851	0.00338135	0.00217075	0.0025464	0.00418404	0.00190028	0.000657877	0.00319767	0.00494351	0.00164581	0.00721033	0.00285701	0.00360501	0.00190247	0.000890701	0.00273426	0.00302725	0.00191284
0.74	0.00123117	0.000916238	0.00285563	0.00339646	0.00213713	0.0025117	0.00415119	0.00187956	0.000638438	0.00319075	0.00497695	0.00167347	0.00721807	0.00286553	0.00362485	0.00190242	0.000887856	0.00274458	0.00302571	0.00191444
0.75	0.0012728	0.000912745	0.00283669	0.00341301	0.00209993	0.00248772	0.00411545	0.00186349	0.00062202	0.00318639	0.00501425	0.00169563	0.00722942	0.00288293	0.00364364	0.00190439	0.000887787	0.00275162	0.0030258	0.00191514
0.76	0.00131351	0.000911492	0.00281537	0.00342724	0.00206992	0.00246292	0.00407477	0.00184262	0.000601183	0.00317823	0.00504707	0.00171949	0.00723821	0.00289035	0.00366617	0.00190563	0.000886354	0.00276106	0.00302637	0.00191199
0.77	0.00135532	0.000905113	0.00279385	0.00344204	0.00204402	0.00243426	0.00403298	0.00182768	0.000586328	0.00318031	0.00508078	0.00174034	0.00724535	0.00290374	0.00368593	0.00190899	0.000891047	0.00276671	0.00302772	0.00191503
0.78	0.00140106	0.000898329	0.00277446	0.00345614	0.00201805	0.00240858	0.00397508	0.00181296	0.000567534	0.00317935	0.00511052	0.00175716	0.00724575	0.00291308	0.00371348	0.00191154	0.000892742	0.00277247	0.00302827	0.00191529
0.79	0.00144385	0.000892668	0.00275024	0.00346761	0.00198923	0.00238119	0.00392441	0.00179124	0.000551928	0.00318005	0.00515002	0.00177605	0.0072516	0.00292463	0.00373385	0.00191879	0.000893808	0.00277606	0.0030256	0.00191282
0.8	0.00149054	0.000888674	0.00272242	0.00347789	0.0019662	0.00235148	0.00386683	0.00176759	0.000534462	0.00317547	0.005191	0.00179677	0.00725453	0.00293729	0.00375775	0.00192066	0.000893935	0.00278297	0.00302687	0.00191209
0.81	0.0015314	0.000880821	0.00269655	0.00348967	0.00194474	0.00232701	0.00381403	0.00174435	0.000513452	0.00316816	0.00522054	0.00181994	0.00725527	0.00295104	0.00377807	0.00192351	0.000894585	0.00278111	0.00302741	0.00190943
0.82	0.0015711	0.000874184	0.00267123	0.00350077	0.00191331	0.00229625	0.00375214	0.00171769	0.000488631	0.00316526	0.00524604	0.00183961	0.00725444	0.00296433	0.00379838	0.0019288	0.000899167	0.00278192	0.00302684	0.00191114
0.83	0.00160878	0.000868329	0.00264404	0.00350491	0.00188628	0.00226803	0.00368994	0.0016996	0.000466384	0.00316485	0.00527424	0.00185939	0.00725297	0.00297697	0.00381743	0.00193466	0.000903526	0.00278095	0.00302759	0.0019071
0.84	0.00164915	0.000863711	0.00261339	0.00351396	0.00185544	0.00223999	0.00362397	0.00168564	0.0004391	0.00316273	0.00530793	0.00187943	0.00724922	0.00298906	0.00383778	0.00193559	0.000906764	0.00277607	0.00302897	0.00190459
0.85	0.00168503	0.000860094	0.0025863	0.00351972	0.00182201	0.0022129	0.00355552	0.00167053	0.00041683	0.00316303	0.00533598	0.00189748	0.00724925	0.00299996	0.00385886	0.00193762	0.000913231	0.00277032	0.00303034	0.00189833
0.86	0.00172607	0.0008496	0.00255159	0.00352785	0.00179821	0.0021812	0.00348553	0.00165626	0.000394333	0.00315699	0.00536483	0.00191488	0.00725144	0.00300713	0.00387964	0.00194383	0.000918302	0.00276208	0.00303125	0.0018886
0.87	0.00176805	0.000845856	0.00252272	0.00353204	0.00177073	0.00215163	0.0034133	0.00163613	0.000367329	0.00315832	0.00539599	0.00193489	0.00725102	0.00302155	0.00389839	0.0019503	0.000923386	0.00275522	0.00302987	0.00187721
0.88	0.00180881	0.000839391	0.00249073	0.00353598	0.00174432	0.00211891	0.00333948	0.00162218	0.000337671	0.00315233	0.00542093	0.00195185	0.00725077	0.00303218	0.00391843	0.00195535	0.000926535	0.00274744	0.00302809	0.00186834
0.89	0.00185286	0.000836466	0.00245751	0.00353976	0.00171497	0.00209009	0.00326043	0.00161007	0.000308872	0.00314281	0.00545173	0.00197069	0.00725574	0.00304804	0.00394401	0.00195655	0.000928166	0.00273715	0.00302234	0.00185892
0.9	0.00189564	0.000830715	0.00242177	0.00354058	0.0016829	0.00206132	0.00318679	0.00159531	0.000279034	0.00313827	0.00547905	0.00198881	0.00726132	0.00306018	0.00396087	0.0019583	0.000932707	0.00272628	0.0030184	0.00184636
0.91	0.00193882	0.000822966	0.00238971	0.00354465	0.0016533	0.00202897	0.0031094	0.00158671	0.000246499	0.00313694	0.00549502	0.00200536	0.0072689	0.00307086	0.00398063	0.0019569	0.000936013	0.00271167	0.00301175	0.00183365
0.92	0.00198308	0.000815375	0.00235177	0.00354721	0.00162642	0.00199879	0.0030339	0.00158346	0.000214368	0.00313415	0.00551522	0.00202056	0.00727959	0.00308096	0.00399976	0.00195675	0.000936691	0.00269694	0.00300342	0.00182111
0.93	0.00202709	0.000804782	0.00231561	0.00354688	0.0015926	0.00196808	0.00295218	0.0015716	0.000181998	0.00312629	0.0055361	0.00203376	0.00729088	0.00308659	0.00401595	0.00195874	0.000938067	0.00267931	0.00299494	0.00179604
0.94	0.00206743	0.000795094	0.00227836	0.00354728	0.0015671	0.00194141	0.00287866	0.00155622	0.000145766	0.00311727	0.00555131	0.0020476	0.00730245	0.00308544	0.00402917	0.00196161	0.000940171	0.00266618	0.00298144	0.00177787
0.95	0.00211331	0.000784221	0.0022375	0.00354553	0.00154256	0.00191315	0.00280455	0.00154456	0.000108862	0.00310011	0.00556023	0.00206163	0.00731414	0.00309721	0.00403938	0.00196373	0.000940667	0.00264939	0.00296908	0.00175679
0.96	0.00215914	0.000772671	0.00219602	0.00353885	0.00151364	0.00188796	0.00272811	0.0015299	7.12019e-05	0.00308777	0.00558181	0.00207822	0.00732737	0.00310227	0.00404543	0.00196426	0.000941012	0.00263071	0.00295774	0.00173266
0.97	0.00220563	0.000760852	0.00215662	0.00353262	0.00148871	0.00186015	0.00265438	0.00151798	3.26437e-05	0.00307388	0.00559229	0.00209084	0.00733852	0.00310546	0.00405508	0.00195796	0.000937654	0.00260806	0.0029439	0.00170817
0.98	0.00225167	0.000751487	0.00211651	0.00352705	0.00146364	0.00183611	0.00258552	0.00150669	-8.91479e-06	0.00305835	0.00561349	0.00210056	0.00734532	0.00311201	0.00406381	0.00195888	0.000935279	0.00258704	0.0029321	0.00168412
0.99	0.00229533	0.00073922	0.00207757	0.00351709	0.00145927	0.00180966	0.00250785	0.00149568	-5.23193e-05	0.00304076	0.00562298	0.00211261	0.00735726	0.00311678	0.004073	0.00195975	0.00093235	0.00256299	0.00291937	0.00166164
