# Supplementary material for: Bilateral regulation of EGFR activity and local PI(4,5)P2 dynamics in mammalian cells observed with superresolution microscopy
Source: eLife journal article supplement (doi:10.7554/elife.101652), 2024-10-09
Supplement: fig2-data1 [file Figure 2C.xlsx]

## Sheet: EGFR_TubbyC_before
	cell#1	cell#2	cell#3	cell#4	cell#5	cell#6	cell#7	cell#8
0.01	0.000137849	0.000453466	0.000175621	0.000553468	0.000567839	0.000195952	0.000334638	0.000339015
0.02	0.000365676	0.000910176	0.000420225	0.00114953	0.00126948	0.000697919	0.000766885	0.000650944
0.03	0.000640134	0.00140386	0.000570233	0.0017423	0.00192725	0.00111546	0.00137041	0.000974181
0.04	0.000825117	0.00189941	0.000664408	0.00234736	0.00258828	0.00146272	0.00171743	0.00139025
0.05	0.00104598	0.00236519	0.000769734	0.00290652	0.00320103	0.00179751	0.00223425	0.00175682
0.06	0.00122863	0.00280501	0.000951505	0.00343865	0.00384728	0.00226518	0.00261537	0.00213447
0.07	0.00143993	0.00320496	0.00109007	0.00397553	0.00450537	0.00269727	0.00302152	0.00252114
0.08	0.00160483	0.00362976	0.00119097	0.00448773	0.00514863	0.00309102	0.00344748	0.00289343
0.09	0.00181132	0.00401373	0.00137584	0.00492945	0.0057726	0.00357129	0.00393253	0.00328852
0.1	0.0019875	0.00440513	0.00153773	0.0053988	0.0063762	0.00400166	0.00437766	0.00367569
0.11	0.00218022	0.00472938	0.00168567	0.00584461	0.00694605	0.00440593	0.00478592	0.0040096
0.12	0.0023764	0.00500634	0.0018551	0.00629509	0.00747979	0.00488164	0.00529982	0.00439639
0.13	0.00256047	0.00531459	0.00196281	0.00671692	0.00801574	0.00536411	0.00571618	0.0047438
0.14	0.00270872	0.00557341	0.0020877	0.00715355	0.0085091	0.00583996	0.0061595	0.00510565
0.15	0.00287106	0.00582448	0.00221709	0.00755054	0.0089729	0.0063245	0.00658235	0.005419
0.16	0.00301527	0.00604558	0.00236929	0.00795224	0.00939254	0.00679726	0.00700658	0.00576511
0.17	0.00320204	0.00626324	0.00248562	0.00834225	0.00981681	0.00726775	0.00739983	0.00607036
0.18	0.0033837	0.00649238	0.00258575	0.00871221	0.0102129	0.00759887	0.00780407	0.00635394
0.19	0.00354867	0.00669082	0.00268902	0.00906966	0.0105931	0.00798421	0.00821716	0.0066454
0.2	0.00370583	0.00685217	0.00279251	0.00939717	0.0109382	0.00833214	0.00862218	0.00690655
0.21	0.00385054	0.00700181	0.0029151	0.00973957	0.0112683	0.00871378	0.00895034	0.00714657
0.22	0.00398175	0.00713479	0.00303736	0.010072	0.0115743	0.00906297	0.00928428	0.00741396
0.23	0.00410944	0.00723865	0.00316697	0.010386	0.0118634	0.0093914	0.00960283	0.00765085
0.24	0.00423306	0.00732825	0.00329701	0.0106673	0.0121325	0.00970725	0.00987425	0.00788211
0.25	0.00436824	0.00743068	0.00343431	0.0109579	0.0123908	0.00998403	0.0101381	0.00809621
0.26	0.00448805	0.00748333	0.00355376	0.0112375	0.0126307	0.0102417	0.0104371	0.00830829
0.27	0.00457006	0.0075645	0.00365664	0.0115309	0.0128391	0.0105145	0.010705	0.00847097
0.28	0.00465676	0.00763632	0.00377158	0.0117774	0.013055	0.0107516	0.0109477	0.00865419
0.29	0.00474189	0.00767608	0.00388223	0.012018	0.0132646	0.0109594	0.0111725	0.00878832
0.3	0.004818	0.00770142	0.00400263	0.0122616	0.0134555	0.0111576	0.0114151	0.00892705
0.31	0.00487505	0.0077384	0.00409694	0.0124711	0.0136289	0.0113129	0.0116614	0.00905873
0.32	0.00492843	0.00774487	0.00419007	0.0126844	0.013783	0.0114585	0.0118627	0.00919303
0.33	0.00496101	0.00776953	0.00430611	0.0128846	0.0139326	0.0116247	0.0120558	0.00930452
0.34	0.00499969	0.00778067	0.00440413	0.0130781	0.01407	0.0117811	0.0122357	0.0093906
0.35	0.00504458	0.00777101	0.00447565	0.0132353	0.0141881	0.0119552	0.0123953	0.00948797
0.36	0.00507962	0.00774623	0.00457113	0.0133868	0.0143157	0.0120534	0.0125315	0.00957436
0.37	0.0051244	0.00774675	0.00465357	0.0135302	0.014419	0.0122139	0.0126518	0.00961883
0.38	0.00517648	0.00771743	0.00469749	0.0136677	0.0145206	0.0122882	0.0127589	0.0096997
0.39	0.0052132	0.0077	0.00472991	0.0137767	0.0146137	0.0124315	0.012864	0.00979391
0.4	0.00525711	0.00767344	0.00479911	0.0138867	0.0146991	0.0125874	0.0129458	0.00985882
0.41	0.00531356	0.00765228	0.0048681	0.014002	0.014788	0.0127173	0.0129554	0.00992499
0.42	0.00533195	0.00759784	0.00490558	0.014084	0.0148672	0.0127963	0.0129307	0.0100054
0.43	0.00537682	0.00756488	0.0049417	0.0141674	0.0149407	0.0128771	0.0129046	0.0100576
0.44	0.00541283	0.00750313	0.00499661	0.0142316	0.0150004	0.0129608	0.0128787	0.0101137
0.45	0.00547145	0.0074597	0.00505144	0.0142891	0.0150654	0.0130316	0.0127997	0.0101746
0.46	0.00551098	0.00741092	0.00505962	0.0143312	0.0150997	0.0130678	0.01269	0.0101981
0.47	0.00554772	0.00734755	0.00505794	0.0143613	0.01514	0.0130889	0.0125706	0.0102285
0.48	0.00556724	0.00729615	0.00506267	0.0143778	0.0151725	0.0131035	0.0124042	0.0102328
0.49	0.00559451	0.00725459	0.00508568	0.0143866	0.0151989	0.0131261	0.0122148	0.0102303
0.5	0.00562105	0.00722417	0.00509995	0.0143875	0.0152217	0.0130752	0.0120576	0.0102521
0.51	0.00562059	0.00717863	0.0051011	0.0143763	0.015235	0.0130635	0.0118306	0.0102582
0.52	0.00560843	0.00712103	0.00509695	0.0143573	0.0152398	0.0130801	0.0116715	0.0102341
0.53	0.00557753	0.00707547	0.00513212	0.0143378	0.0152409	0.0130825	0.0114549	0.0102189
0.54	0.00556085	0.00703134	0.00518643	0.0143133	0.0152229	0.0131151	0.0112609	0.0101984
0.55	0.005511	0.00701409	0.00518934	0.0142865	0.0151968	0.0131197	0.0110812	0.0101704
0.56	0.0054705	0.00694682	0.00521621	0.0142548	0.0151668	0.0131355	0.0108995	0.0101403
0.57	0.00542338	0.00690685	0.00521551	0.0142345	0.015137	0.0131641	0.0107044	0.0101207
0.58	0.00536475	0.00684198	0.00523333	0.0142009	0.0150942	0.0131895	0.0105079	0.0101052
0.59	0.00530002	0.0067914	0.00521458	0.0141565	0.0150408	0.0132217	0.0103165	0.0100527
0.6	0.00522321	0.00673186	0.00520951	0.0141085	0.014979	0.0132324	0.0101273	0.0100128
0.61	0.00515051	0.0066929	0.0052301	0.014048	0.0149141	0.0132718	0.00993797	0.00998463
0.62	0.00507762	0.00662472	0.00522253	0.0139941	0.0148414	0.0132747	0.00975489	0.00993443
0.63	0.00498826	0.00656022	0.00524287	0.0139327	0.0147634	0.0133079	0.00957689	0.00990501
0.64	0.00490377	0.00649488	0.0052551	0.0138821	0.0146721	0.0133217	0.00940462	0.00986625
0.65	0.00482511	0.00641591	0.00526347	0.0138314	0.0145703	0.01332	0.00921687	0.00984113
0.66	0.00473351	0.00633286	0.00526192	0.0137768	0.0144696	0.0133258	0.00905929	0.00977564
0.67	0.00466554	0.00626636	0.0052471	0.0137064	0.0143615	0.0133097	0.00890461	0.00973236
0.68	0.00458797	0.00616229	0.00524408	0.0136491	0.014258	0.0132847	0.00871934	0.00969296
0.69	0.0045142	0.00607198	0.00528283	0.0135804	0.0141484	0.0131977	0.0085291	0.00964721
0.7	0.00444481	0.00598196	0.00529197	0.0135137	0.0140268	0.0131296	0.00834158	0.00958933
0.71	0.00436987	0.00589553	0.00530286	0.0134382	0.0139025	0.0130561	0.00813953	0.00952667
0.72	0.00430412	0.00579267	0.00533178	0.0133547	0.0137791	0.012985	0.00798782	0.0094583
0.73	0.00423121	0.00568679	0.00538374	0.0132558	0.0136501	0.012875	0.00783423	0.00939473
0.74	0.00415222	0.00558329	0.00542076	0.0131542	0.0135187	0.0127864	0.00766229	0.0093305
0.75	0.00406388	0.00547102	0.00548582	0.0130527	0.0133964	0.0126754	0.00748446	0.00925083
0.76	0.00398665	0.00536965	0.00553583	0.0129401	0.0132654	0.0125763	0.00733548	0.009166
0.77	0.00390957	0.00526763	0.00557839	0.0128179	0.01314	0.0124677	0.00719627	0.00906731
0.78	0.00382756	0.00515674	0.00563397	0.0126853	0.0130001	0.0123946	0.00705744	0.00896161
0.79	0.00375641	0.00504759	0.00569614	0.0125553	0.0128794	0.0122992	0.00691161	0.00883823
0.8	0.00368354	0.00493615	0.00577656	0.0124117	0.0127561	0.012181	0.00673806	0.00871615
0.81	0.00361935	0.0048336	0.00584782	0.012263	0.0126298	0.0120827	0.00658764	0.00857329
0.82	0.00355426	0.00473626	0.00593787	0.01211	0.0125095	0.0119965	0.00643023	0.00844623
0.83	0.00349401	0.00464426	0.00600462	0.0119507	0.0123928	0.0119214	0.00627479	0.00832288
0.84	0.00344373	0.00453942	0.00608775	0.0117853	0.0122766	0.0118502	0.0061008	0.00819081
0.85	0.00342302	0.00442807	0.00614512	0.0116128	0.0121549	0.0117993	0.00592771	0.00805922
0.86	0.00338109	0.00432388	0.0062046	0.0114629	0.0120429	0.0117483	0.00574506	0.00792577
0.87	0.00333258	0.00421779	0.00628629	0.0113003	0.0119325	0.011693	0.00556476	0.00779604
0.88	0.00328767	0.00412395	0.00636224	0.0111292	0.0118206	0.0116348	0.00536408	0.00766498
0.89	0.00324432	0.00401265	0.00643417	0.0109596	0.0117141	0.011577	0.00515402	0.0075291
0.9	0.00323401	0.00392245	0.00648194	0.0107946	0.0116068	0.0115145	0.00498563	0.00738235
0.91	0.00320693	0.00382111	0.00652959	0.0106238	0.0114926	0.0114674	0.00482282	0.00724716
0.92	0.00318811	0.00372557	0.00659355	0.0104545	0.0113757	0.0114206	0.00462364	0.00710805
0.93	0.00314201	0.00362266	0.00664725	0.0102705	0.0112604	0.0113633	0.00443927	0.00696158
0.94	0.00311284	0.00350722	0.00671515	0.0100994	0.0111366	0.0113087	0.00423209	0.00682083
0.95	0.00308334	0.00338244	0.00681013	0.00991983	0.0110204	0.0112827	0.00406495	0.00668285
0.96	0.00304305	0.00324736	0.00686706	0.00974399	0.0108966	0.0112206	0.00388484	0.00653338
0.97	0.00299892	0.00311176	0.00693852	0.00955976	0.010775	0.0111742	0.00369005	0.00638168
0.98	0.00295313	0.00297634	0.00700392	0.00938231	0.0106473	0.0111445	0.00350495	0.0062434
0.99	0.00290565	0.00283798	0.00709768	0.00920754	0.0105135	0.0111092	0.00332681	0.00610933

## Sheet: EGFR_TubbyC_after
	cell#1	cell#2	cell#3	cell#4	cell#5	cell#6	cell#7	cell#8	cell#9	cell#10	cell#11	cell#12	cell#13
0.01	0.00012571	8.39811e-05	7.98609e-05	-7.48504e-06	2.09122e-05	0.000143555	2.14879e-05	-4.92706e-05	0.000136349	0.000306334	8.79304e-05	8.01019e-05	1.10473e-05
0.02	0.000208009	0.000253825	0.000198932	5.70645e-05	0.000145706	0.000263922	-9.76046e-05	4.13578e-05	0.000441043	0.000379087	0.000329286	0.000313599	0.000112101
0.03	0.000393188	0.000379916	0.000262362	6.97605e-05	0.000204182	0.000372105	9.30118e-06	0.000164649	0.000660743	0.00035155	0.000533769	0.000472548	7.85746e-05
0.04	0.00053281	0.000457024	0.000354013	0.000126736	0.000270176	0.000500164	7.21679e-06	0.000219885	0.000927744	0.000406345	0.000671282	0.000632901	0.000117476
0.05	0.000691811	0.000520129	0.000447027	0.000215681	0.000313661	0.000636177	-1.25104e-06	0.000274638	0.00120774	0.000268313	0.000863887	0.000808656	0.000171932
0.06	0.000858297	0.000643899	0.00052796	0.000275656	0.000335365	0.000771836	-2.61483e-05	0.000335451	0.00141157	0.00010583	0.00104868	0.00095713	0.00024357
0.07	0.00103221	0.000784277	0.000626034	0.00034348	0.000407179	0.000908419	-3.15645e-05	0.000370903	0.00158543	-4.39145e-05	0.00126372	0.00113813	0.000303679
0.08	0.0011839	0.000873938	0.000739421	0.000390478	0.000436198	0.000992786	1.83184e-06	0.000486123	0.00182834	-1.20219e-05	0.00146976	0.00128916	0.000407756
0.09	0.00131086	0.00101611	0.000825841	0.000429848	0.000479402	0.00110456	4.23977e-06	0.000605142	0.00202702	0.000151191	0.0016848	0.00143702	0.00044386
0.1	0.00142646	0.00112434	0.000922933	0.000482139	0.000513093	0.00120517	1.14082e-05	0.000691862	0.00224822	0.000229119	0.0018572	0.00157753	0.000529187
0.11	0.00154815	0.00127113	0.0010003	0.000544225	0.000564663	0.00133238	3.57085e-05	0.00085742	0.00247889	0.00031661	0.00201801	0.00170704	0.00059651
0.12	0.00168641	0.00135704	0.00106315	0.000604601	0.000605149	0.00143533	0.000104068	0.00100688	0.00268708	0.00056253	0.00217137	0.00184271	0.000667009
0.13	0.00181814	0.00146031	0.0011077	0.00064941	0.000638061	0.0015304	0.000140785	0.00116915	0.00284377	0.000715785	0.00231057	0.00198553	0.000713498
0.14	0.0019847	0.00157635	0.00117801	0.000705713	0.000652193	0.00162906	0.000203105	0.00134186	0.00305534	0.00081188	0.00240075	0.00214713	0.000768704
0.15	0.00212605	0.0016426	0.00123656	0.000786923	0.000695297	0.00171941	0.000270714	0.00148445	0.00323869	0.00083449	0.00252365	0.00229381	0.000810723
0.16	0.00226143	0.00175034	0.00130275	0.000852179	0.000732112	0.00181057	0.000355301	0.00164544	0.00344429	0.000950003	0.00262387	0.00245305	0.000835506
0.17	0.00240609	0.00184259	0.00136064	0.000920766	0.000765242	0.00188608	0.000443149	0.00181815	0.00361052	0.00108139	0.00274679	0.00261103	0.000888155
0.18	0.00256902	0.00190824	0.00141546	0.000978933	0.000806422	0.00195349	0.000502887	0.00197999	0.00380472	0.00125919	0.00284216	0.0027437	0.000918799
0.19	0.00271178	0.00197623	0.00145287	0.0010416	0.000830815	0.00200231	0.000574662	0.00212181	0.00400914	0.00139528	0.00293957	0.0028936	0.000948929
0.2	0.00287101	0.00206425	0.00150826	0.00111948	0.000867566	0.00208267	0.000629187	0.00222461	0.00416401	0.00163391	0.00305307	0.00303948	0.000985088
0.21	0.00301176	0.00216934	0.00157497	0.00117642	0.000913078	0.0021465	0.000677309	0.00233238	0.00431854	0.00180241	0.00311458	0.00315282	0.00100955
0.22	0.00315961	0.00224853	0.0016196	0.00126268	0.00096063	0.00221136	0.000728379	0.00242852	0.00447056	0.00197552	0.00318766	0.00329133	0.00103428
0.23	0.00330283	0.00232134	0.00167402	0.00134979	0.00100933	0.00228206	0.000778493	0.00250824	0.00462071	0.00213211	0.00324933	0.00338633	0.00103882
0.24	0.00346151	0.00238806	0.00171915	0.00143573	0.00105089	0.00232821	0.000795799	0.00256853	0.00479401	0.0022006	0.00332213	0.00349899	0.0010303
0.25	0.00362315	0.00245744	0.00178128	0.00152647	0.00110008	0.00239074	0.000858677	0.00263514	0.00494847	0.00226646	0.00335223	0.00356514	0.00104976
0.26	0.00379261	0.00250907	0.00182599	0.00160358	0.00114718	0.00245209	0.000898999	0.00269192	0.0050643	0.00238133	0.00339724	0.00367079	0.00104532
0.27	0.00390607	0.00258132	0.00186281	0.00166838	0.00119481	0.00250535	0.000928981	0.00273427	0.00516755	0.00252546	0.00343192	0.0037751	0.00105476
0.28	0.00402225	0.00266043	0.0018992	0.00173611	0.0012486	0.00258484	0.000957723	0.00276003	0.005275	0.00261492	0.00348269	0.00386693	0.00104104
0.29	0.00414	0.00272346	0.00191587	0.00180555	0.00129363	0.00263327	0.000995109	0.00279433	0.00537311	0.00277894	0.00353834	0.00393401	0.00102234
0.3	0.0042538	0.00279405	0.00193924	0.00187102	0.00134045	0.00265951	0.00101717	0.00282444	0.00544757	0.00296669	0.00356957	0.00399001	0.00100642
0.31	0.00433934	0.00284372	0.00195509	0.00192129	0.00139849	0.00269027	0.00106638	0.00284572	0.00551003	0.0031675	0.00360786	0.00406564	0.00100535
0.32	0.00443631	0.00290594	0.00197384	0.00197768	0.00146232	0.00273308	0.00111067	0.00289149	0.00555037	0.00333599	0.00360363	0.00411957	0.00100513
0.33	0.00452271	0.00297782	0.0019679	0.00203319	0.00152578	0.0027909	0.00113698	0.00290709	0.0056033	0.00351274	0.00363975	0.00419379	0.000990418
0.34	0.0045956	0.00302558	0.00197212	0.00209391	0.00157975	0.00282444	0.00114407	0.00290996	0.00563805	0.00362055	0.00364459	0.00425462	0.000966603
0.35	0.00467478	0.00307485	0.00195715	0.00213965	0.00163205	0.00286137	0.00118501	0.00292014	0.00568409	0.00365481	0.00369708	0.00429371	0.000953561
0.36	0.00476131	0.00312128	0.00194756	0.00218539	0.00167004	0.00289734	0.00119566	0.00293797	0.00571399	0.00363518	0.00372501	0.00432646	0.000953032
0.37	0.00482884	0.00318482	0.00192452	0.00223803	0.00171657	0.00292462	0.00122121	0.00295934	0.00572676	0.0036295	0.00374153	0.00438138	0.000940698
0.38	0.00491055	0.00325134	0.00191298	0.00229344	0.00175323	0.00296453	0.00126721	0.00297875	0.00573474	0.0035557	0.00377675	0.00440275	0.00093188
0.39	0.00498209	0.00331035	0.00189375	0.00233748	0.00179036	0.00300525	0.00130338	0.00298345	0.00571325	0.00346758	0.00382	0.00441048	0.000919002
0.4	0.00506426	0.00339386	0.00187596	0.00237542	0.00181954	0.00304159	0.00135585	0.00298637	0.00571777	0.00347283	0.00383906	0.00440293	0.000900922
0.41	0.00515345	0.00346902	0.0018571	0.00242658	0.0018549	0.00306496	0.00140251	0.00301571	0.00570843	0.0033934	0.00387361	0.00440465	0.000886373
0.42	0.005242	0.00354669	0.00184012	0.00245448	0.00189655	0.00308588	0.00144247	0.00304665	0.00573404	0.0033384	0.00390585	0.00439784	0.000889224
0.43	0.00533345	0.00361442	0.00181899	0.00249661	0.00193452	0.00309671	0.00148417	0.00305511	0.00572273	0.00331585	0.00394349	0.00437131	0.000882388
0.44	0.00537664	0.00370786	0.00179945	0.00254357	0.00196129	0.00311441	0.0015471	0.0030672	0.00573678	0.00323442	0.00397648	0.00433856	0.000891456
0.45	0.00543406	0.00378806	0.00178019	0.00255501	0.00198804	0.0031272	0.00162202	0.00305026	0.00573669	0.00313081	0.00402991	0.00431237	0.000908096
0.46	0.00549218	0.00387905	0.00177084	0.00257659	0.00201614	0.00314854	0.00169749	0.00304447	0.00572522	0.00303353	0.00404238	0.00430133	0.000902925
0.47	0.0055523	0.00396663	0.00174842	0.00259505	0.00205387	0.0031498	0.00176312	0.0030628	0.00571631	0.00293568	0.00409457	0.00429976	0.0009147
0.48	0.00558255	0.00404777	0.0017289	0.00261291	0.00208755	0.00316655	0.00183159	0.0030306	0.00572309	0.00286642	0.00412709	0.00428215	0.000935476
0.49	0.00563467	0.00413368	0.0016952	0.00262604	0.00211994	0.00317925	0.0018883	0.00301857	0.00572057	0.00279514	0.00415323	0.00424677	0.000960825
0.5	0.00565613	0.00420996	0.00167219	0.00263291	0.00214704	0.00319445	0.00195322	0.00300656	0.00572585	0.00271577	0.00420123	0.00422435	0.00096815
0.51	0.0056907	0.0042844	0.00164251	0.00263453	0.00216655	0.00320501	0.00202298	0.00296699	0.00570946	0.00265162	0.00425337	0.00419517	0.000982467
0.52	0.00572257	0.00434166	0.00163006	0.00262861	0.00219853	0.0032014	0.00207982	0.00294138	0.0057083	0.00257509	0.0043244	0.00417474	0.000995376
0.53	0.00575305	0.00440814	0.00161372	0.00262729	0.00221609	0.00320643	0.00213151	0.00290265	0.00571012	0.00252327	0.00436948	0.00414583	0.00100343
0.54	0.00576454	0.00445672	0.00159841	0.00260914	0.00223776	0.00320663	0.00217793	0.00285699	0.00567795	0.00246312	0.00443124	0.00410556	0.00100982
0.55	0.00577739	0.00452061	0.00157893	0.00261086	0.00223875	0.00321197	0.00221385	0.00283981	0.00564165	0.00246242	0.00448759	0.00407337	0.00103094
0.56	0.00579811	0.00457523	0.00157753	0.00260292	0.00224691	0.00320887	0.00227544	0.00280909	0.0056238	0.00245292	0.00451974	0.00403538	0.00104664
0.57	0.00581717	0.00461995	0.00156572	0.00259333	0.0022571	0.00319677	0.00231731	0.00277561	0.00561296	0.00244781	0.0045505	0.00398274	0.00106984
0.58	0.00583337	0.00465761	0.00155296	0.00258576	0.00225798	0.00318079	0.00233998	0.00275229	0.00559599	0.00241382	0.00458379	0.00393611	0.00108729
0.59	0.00584302	0.00470594	0.0015531	0.00257175	0.00226068	0.00317442	0.00236531	0.00273021	0.00558941	0.00245009	0.0046395	0.00387875	0.00110745
0.6	0.00586124	0.00473406	0.001545	0.00255138	0.00227314	0.00314708	0.00239719	0.00269892	0.00556944	0.00238617	0.0046925	0.00382389	0.00112924
0.61	0.00586577	0.00477162	0.00153665	0.0025291	0.00227452	0.00313593	0.00242394	0.00267702	0.00554826	0.00236668	0.00473239	0.00373222	0.00114877
0.62	0.00588846	0.00482616	0.00152625	0.00251981	0.00227091	0.00311568	0.00246068	0.00264465	0.00555273	0.00237307	0.00475711	0.00366826	0.00116672
0.63	0.00590813	0.00485202	0.00152415	0.00249608	0.00227361	0.00310314	0.00248182	0.00262559	0.00552508	0.00241419	0.0048112	0.00362091	0.00116722
0.64	0.00592896	0.00487969	0.00152772	0.00246602	0.00227183	0.00308786	0.00250408	0.00257835	0.00549868	0.00245056	0.00485352	0.00354423	0.0011872
0.65	0.00594201	0.00490307	0.00153331	0.00244182	0.00226244	0.00306757	0.0025259	0.00253827	0.00548329	0.00248611	0.00490482	0.00349177	0.0012058
0.66	0.00594379	0.00494844	0.0015416	0.00240717	0.0022555	0.00305072	0.00254541	0.00250792	0.00547049	0.00250062	0.00493258	0.0034408	0.00120628
0.67	0.00595727	0.00498825	0.00154443	0.00238446	0.00225109	0.00303004	0.00255972	0.00247679	0.00544303	0.00251151	0.00492203	0.00340881	0.00120687
0.68	0.00595398	0.00501608	0.00154593	0.00235716	0.00224514	0.00302409	0.00258107	0.00243912	0.0054167	0.00252052	0.00494291	0.00338438	0.00120817
0.69	0.00595327	0.00504529	0.00154617	0.00233033	0.00223436	0.00301621	0.00260207	0.00242504	0.00537818	0.00249304	0.00495387	0.00333685	0.00122231
0.7	0.00595743	0.00507762	0.00155006	0.00230427	0.0022325	0.00300092	0.00262724	0.00239484	0.00532361	0.00247483	0.00492612	0.00330817	0.00122517
0.71	0.00598848	0.00510274	0.00155591	0.00228599	0.00223244	0.00299782	0.00264895	0.00238178	0.00527394	0.00241676	0.00493638	0.00329369	0.00122581
0.72	0.00598724	0.00513287	0.00155964	0.00226822	0.00223528	0.00299389	0.00267432	0.00236455	0.00520868	0.0023861	0.00492039	0.00329545	0.00122468
0.73	0.0059961	0.00517502	0.00156559	0.00224914	0.00223297	0.00299559	0.0027269	0.0023346	0.00515368	0.00235424	0.00490492	0.00329412	0.0012309
0.74	0.00598289	0.0052079	0.00156673	0.00222648	0.00222794	0.00300166	0.0027687	0.00231346	0.00508088	0.00235219	0.00486104	0.00329001	0.00122943
0.75	0.00596964	0.00524666	0.00156962	0.00220427	0.00222505	0.00301557	0.00282634	0.00229527	0.00499609	0.00234944	0.00480712	0.00327021	0.00122203
0.76	0.00596411	0.00528641	0.00157048	0.00219877	0.00223158	0.0030228	0.00286355	0.00228744	0.0049226	0.00237123	0.00475593	0.00327288	0.00121794
0.77	0.00597412	0.00531963	0.0015652	0.00218304	0.00222962	0.00302637	0.0029109	0.00227903	0.00483324	0.00238848	0.00470596	0.00326787	0.00122368
0.78	0.00596729	0.00535065	0.00155774	0.00216504	0.00222917	0.00302671	0.00296249	0.00224038	0.00473343	0.00247831	0.00463367	0.00325462	0.0012222
0.79	0.00594132	0.00538383	0.00155054	0.00214536	0.00222527	0.00303481	0.00301212	0.00221017	0.0046329	0.00248431	0.0045576	0.00324912	0.00122008
0.8	0.00593023	0.00541045	0.00154318	0.00213224	0.00221973	0.00303446	0.00305685	0.00217288	0.00451938	0.00252825	0.00448993	0.00323705	0.00122428
0.81	0.00593343	0.0054297	0.00153024	0.00211466	0.00221887	0.00303757	0.00309811	0.00214949	0.00439837	0.0026066	0.00437895	0.00323153	0.00123492
0.82	0.00593145	0.00544492	0.00151978	0.00210082	0.0022015	0.00303936	0.00314064	0.00212754	0.00427384	0.00268451	0.00427042	0.00321316	0.00124437
0.83	0.00591616	0.00545928	0.00150251	0.00209051	0.00218931	0.00302538	0.00316394	0.00209919	0.00415695	0.00279542	0.00416244	0.00319956	0.00124947
0.84	0.00589294	0.00546784	0.00148027	0.00207123	0.00217602	0.00302383	0.00317446	0.00207621	0.00402421	0.00294526	0.00405236	0.00317097	0.00124868
0.85	0.00587892	0.00547849	0.00146556	0.00205657	0.00216081	0.0030191	0.00317806	0.00205859	0.00388782	0.00305602	0.00392818	0.00313625	0.00124134
0.86	0.0058615	0.00547689	0.00145267	0.00203841	0.00214662	0.00301381	0.00317254	0.00202281	0.0037493	0.00319913	0.00380312	0.0031029	0.00124041
0.87	0.00583824	0.00548695	0.0014464	0.00203034	0.0021351	0.00299683	0.00317246	0.00198843	0.0036005	0.00337435	0.00368403	0.00305641	0.00123733
0.88	0.00581342	0.00547814	0.00142757	0.00201009	0.0021177	0.00298698	0.00314594	0.00195144	0.00343938	0.00355015	0.00355703	0.00303273	0.00123389
0.89	0.00577906	0.00546482	0.00140073	0.00200438	0.00210327	0.00296425	0.00312834	0.00191488	0.00327694	0.00368994	0.0034209	0.00300509	0.00122428
0.9	0.00573858	0.00545062	0.00137839	0.00199027	0.00208099	0.0029382	0.00311569	0.00185931	0.00311687	0.00384602	0.00329885	0.00297002	0.00120831
0.91	0.00569568	0.00543273	0.00134341	0.00197498	0.00206425	0.00291764	0.00310228	0.00180242	0.0029652	0.00396864	0.00315527	0.00292507	0.00120356
0.92	0.00565283	0.00541503	0.00132073	0.00195465	0.0020452	0.00287352	0.00307141	0.00175361	0.00281032	0.00412159	0.00299866	0.00290198	0.00118808
0.93	0.00560622	0.0054047	0.0012922	0.00193364	0.00202721	0.00284389	0.00304173	0.00169132	0.00264824	0.00434713	0.0028505	0.00286044	0.00118378
0.94	0.00556319	0.00537853	0.00125749	0.00191484	0.00201527	0.00280456	0.00300731	0.00162568	0.00249806	0.00449686	0.00269337	0.00282659	0.00117707
0.95	0.00550191	0.00536171	0.00122153	0.001903	0.00199238	0.00276725	0.00298059	0.00155899	0.0023442	0.0046559	0.00254509	0.00277869	0.00117741
0.96	0.00542585	0.00533202	0.00118369	0.00187409	0.00197544	0.00272116	0.00294984	0.00150077	0.0021911	0.00482186	0.00241957	0.00274237	0.00115887
0.97	0.00536287	0.00531551	0.00114853	0.00185641	0.00195977	0.00267635	0.00291744	0.00144124	0.00204454	0.00500724	0.00228952	0.00269981	0.00113583
0.98	0.00528102	0.0052936	0.00111368	0.00184271	0.00194496	0.00262233	0.00288006	0.00136943	0.00189957	0.00515191	0.00214809	0.00267489	0.00112478
0.99	0.00520387	0.00527936	0.00106155	0.00182683	0.00192855	0.00257174	0.00284712	0.00132353	0.00175618	0.00527894	0.00200161	0.00263814	0.00110793
