# Supplementary material for: Bilateral regulation of EGFR activity and local PI(4,5)P2 dynamics in mammalian cells observed with superresolution microscopy
Source: eLife journal article supplement (doi:10.7554/elife.101652), 2024-10-09
Supplement: fig2-data1 [file Figure 2E.xlsx]

## Sheet: EGFR_GRB2_before
	cell#1	cell#2	cell#3	cell#4	cell#5	cell#6	cell#7	cell#8	cell#9	cell#10
0.01	-0.000107961	0.000849809	-0.000121608	0.000151817	-0.000265226	0.000582509	4.29728e-05	1.30086e-05	0.000173337	-4.33619e-05
0.02	-6.56672e-05	0.00187835	-3.64037e-06	0.000545959	-0.000193053	0.0012873	0.000185053	6.31568e-05	0.000834017	0.00015271
0.03	9.30131e-05	0.00271463	-3.20298e-05	0.000889333	-0.00018374	0.00207181	0.000328525	7.58298e-05	0.00123023	0.000218638
0.04	0.000149268	0.00357588	-6.6759e-05	0.00118719	-0.000203005	0.0027266	0.000393817	0.000110482	0.00159531	0.000430416
0.05	7.70823e-05	0.00445312	4.71351e-05	0.00142212	-0.000146845	0.0032714	0.000532901	0.000108626	0.00179328	0.000610165
0.06	0.000169504	0.00514829	0.000120957	0.0016638	-8.39451e-05	0.00375336	0.000681322	5.2126e-05	0.0020248	0.000800578
0.07	0.000180986	0.00592047	0.00021521	0.00193213	-0.000121286	0.00418541	0.000719277	5.03592e-05	0.00212768	0.000926855
0.08	0.000316378	0.00648091	0.000181343	0.00216242	-0.000111297	0.00457168	0.000797445	5.60172e-05	0.00223473	0.00103749
0.09	0.000381708	0.00700703	0.000227113	0.00236966	-2.30179e-05	0.00482287	0.000896871	0.000111802	0.00225854	0.00120824
0.1	0.000499196	0.00739091	0.000246053	0.00252758	6.88023e-05	0.00511775	0.000893763	0.000129325	0.00227396	0.00147972
0.11	0.000578556	0.00774243	0.000216432	0.00267747	0.000197338	0.00532906	0.000974999	0.000124653	0.00227898	0.00173388
0.12	0.000619114	0.00804929	9.7585e-05	0.0027438	0.000332935	0.00553719	0.00101806	0.000120429	0.00226359	0.00183372
0.13	0.00072285	0.00830739	-6.31214e-06	0.00282941	0.000411878	0.00572542	0.00103703	0.000104097	0.00227107	0.00191674
0.14	0.000884253	0.00849335	-5.18326e-05	0.00287031	0.000434006	0.00582739	0.00107808	0.000132224	0.0022459	0.00204569
0.15	0.00105694	0.00850586	-6.09671e-05	0.00288003	0.000618773	0.00589147	0.00114609	0.000169814	0.0022513	0.00206795
0.16	0.00121955	0.00858356	-0.000128697	0.00290957	0.000786617	0.00594439	0.00122052	0.000198541	0.00225852	0.00212355
0.17	0.00131934	0.00852413	-0.000180684	0.00294928	0.000929358	0.00597362	0.00131343	0.000240532	0.00222942	0.00216312
0.18	0.0014447	0.00852632	-0.000186612	0.00299938	0.001086	0.00594429	0.00141803	0.00029636	0.00219586	0.00213367
0.19	0.00149654	0.00854054	-0.000256882	0.0030043	0.0011287	0.00587309	0.00146216	0.000354313	0.00217673	0.00213403
0.2	0.00154848	0.00854564	-0.000298553	0.00304257	0.00116357	0.00581109	0.00152504	0.000399979	0.00215092	0.00206861
0.21	0.00162953	0.00854051	-0.00039446	0.00305458	0.0012262	0.00572913	0.00156756	0.000465563	0.00213353	0.00204871
0.22	0.00167674	0.00853649	-0.000451363	0.00307157	0.00127307	0.00569812	0.00163085	0.000516486	0.00210207	0.00200924
0.23	0.00171168	0.00850495	-0.000516003	0.00309054	0.00126742	0.00567586	0.0016762	0.000569162	0.00214359	0.00199881
0.24	0.00174197	0.00849476	-0.000469452	0.00306525	0.00132384	0.00563191	0.00170838	0.000617398	0.00217034	0.00196526
0.25	0.00175128	0.00849871	-0.000471374	0.0030653	0.0013205	0.00555348	0.00170808	0.000658987	0.00223712	0.001939
0.26	0.00178636	0.00853479	-0.000539093	0.00305933	0.00131795	0.0055013	0.00171237	0.000685432	0.00227559	0.0018936
0.27	0.0017984	0.00858398	-0.000549477	0.00301368	0.00129899	0.00543331	0.00173242	0.000743118	0.00230768	0.00188123
0.28	0.00183314	0.00862775	-0.000598642	0.00299932	0.00134123	0.00535064	0.00176269	0.000803528	0.00230174	0.00184462
0.29	0.00184333	0.00862899	-0.000654922	0.00294727	0.00138801	0.00530571	0.00177436	0.000837884	0.00233586	0.00180421
0.3	0.00185146	0.00857991	-0.000699846	0.00295656	0.00139292	0.00527106	0.00177007	0.000884165	0.00238113	0.00174042
0.31	0.00183915	0.00854008	-0.00073091	0.0029518	0.00148161	0.0052084	0.00178222	0.00094672	0.00237542	0.00172604
0.32	0.00181863	0.00847728	-0.000737012	0.00291583	0.00155579	0.00518302	0.00176585	0.000984394	0.00238368	0.0016854
0.33	0.00180554	0.00844673	-0.000746543	0.00287797	0.00163378	0.00517514	0.00175387	0.00102463	0.00238218	0.00163964
0.34	0.0017441	0.00840714	-0.00069074	0.0028452	0.00171128	0.00517488	0.00174283	0.00109091	0.00238182	0.00162645
0.35	0.00171296	0.00835842	-0.000589315	0.0028118	0.00184729	0.00518296	0.00168609	0.00115822	0.00238651	0.00159907
0.36	0.00165942	0.00831699	-0.000550148	0.00278319	0.00198337	0.00516349	0.00164462	0.00121487	0.0023906	0.00158677
0.37	0.00161666	0.00824648	-0.000499434	0.00275731	0.00208185	0.00515501	0.00161858	0.00127093	0.00242248	0.0015873
0.38	0.00154212	0.00822339	-0.00043035	0.00274722	0.00216692	0.00511492	0.00162174	0.0013356	0.00246671	0.00160783
0.39	0.00152369	0.00813838	-0.000403257	0.00272399	0.00224762	0.0050743	0.00160055	0.00137357	0.00247079	0.00161369
0.4	0.00148825	0.00806226	-0.000353407	0.00268466	0.00231242	0.00501076	0.00160513	0.00141603	0.00244107	0.00163831
0.41	0.00147281	0.00800815	-0.000335022	0.00263846	0.00238053	0.00500693	0.00159989	0.00146635	0.00243401	0.00166496
0.42	0.00147884	0.00797506	-0.000330718	0.0025778	0.00244031	0.00494554	0.00159629	0.00151671	0.00245197	0.00166532
0.43	0.00147294	0.00793391	-0.000278736	0.00251156	0.00251712	0.00487614	0.00160747	0.00153719	0.00244082	0.00166416
0.44	0.00149982	0.00784692	-0.000216295	0.00247675	0.00260141	0.00482999	0.00160765	0.00158057	0.00246056	0.00165066
0.45	0.00151216	0.00775409	-0.000192558	0.00242515	0.00266765	0.00476654	0.00161494	0.00161729	0.00247389	0.00166621
0.46	0.00152944	0.00767119	-0.000199459	0.0024281	0.0027308	0.0047077	0.00162813	0.00164251	0.00248468	0.00166854
0.47	0.00156512	0.00758469	-0.00017799	0.00242012	0.00276747	0.00468624	0.00164281	0.00166054	0.00249189	0.0016601
0.48	0.00162521	0.00745766	-0.000204124	0.00242754	0.0028153	0.00460279	0.00165444	0.00169285	0.0025179	0.0016841
0.49	0.00169636	0.00734311	-0.000222555	0.00243026	0.00289376	0.00454655	0.00165958	0.0017263	0.00251847	0.0016982
0.5	0.00179871	0.00723635	-0.000253283	0.00245214	0.00297898	0.00448115	0.00163037	0.00177691	0.00252436	0.00171396
0.51	0.00189925	0.0071213	-0.000294581	0.00245521	0.00306215	0.0044062	0.00161935	0.00181911	0.00253255	0.00173192
0.52	0.00202124	0.00700144	-0.000308768	0.00250206	0.00314889	0.00435652	0.0016392	0.00187314	0.00255542	0.00177133
0.53	0.00213029	0.00686624	-0.000296891	0.0025086	0.00320099	0.00430561	0.00164376	0.00190784	0.00256455	0.00179843
0.54	0.00222779	0.00674268	-0.000360864	0.00254694	0.00326228	0.00422147	0.00169068	0.00195805	0.00259265	0.00183747
0.55	0.00232388	0.0066453	-0.000381784	0.00256697	0.00332721	0.00415127	0.00172849	0.00202169	0.00259009	0.00188317
0.56	0.00242368	0.00656871	-0.000447165	0.00260971	0.00337254	0.00409724	0.00176326	0.00207317	0.00257258	0.0018814
0.57	0.00249712	0.00644657	-0.000528477	0.00263105	0.00341028	0.00406469	0.00179665	0.00211939	0.00257978	0.00189021
0.58	0.0025812	0.00630901	-0.000573427	0.00265144	0.00342199	0.00401331	0.00181431	0.00218369	0.00257228	0.00186326
0.59	0.00265566	0.00618799	-0.000604167	0.00266416	0.00345412	0.00398229	0.00182355	0.00225491	0.0025738	0.00180824
0.6	0.00274435	0.00602606	-0.000678245	0.00267944	0.00347527	0.00392945	0.001831	0.00232047	0.00256951	0.00176754
0.61	0.00283605	0.00588041	-0.000750991	0.00270627	0.00349435	0.00385932	0.00186456	0.00237466	0.00257584	0.00171278
0.62	0.00293452	0.00570704	-0.000753385	0.00271609	0.00353921	0.00378581	0.001935	0.00243063	0.00255878	0.00164805
0.63	0.00304543	0.00554547	-0.000776359	0.00272701	0.00353325	0.00370823	0.00196472	0.00248554	0.00255	0.00158116
0.64	0.00313988	0.00540988	-0.00078992	0.0027694	0.00356931	0.00362747	0.00202257	0.00254282	0.00254825	0.00151038
0.65	0.00323975	0.00524892	-0.000795187	0.00279416	0.00363173	0.00356477	0.00207484	0.00258864	0.00251885	0.00147295
0.66	0.0033491	0.00508683	-0.000800191	0.00282416	0.00370857	0.00347875	0.00210874	0.00266135	0.00247785	0.00141684
0.67	0.00345584	0.00490983	-0.000806293	0.00287348	0.00374214	0.00340451	0.00215701	0.00272542	0.00241096	0.0013465
0.68	0.00354983	0.00472594	-0.000801333	0.00287818	0.00380728	0.00334296	0.00219637	0.00278901	0.00235607	0.00129413
0.69	0.00366138	0.0045289	-0.000829697	0.00290325	0.00389151	0.00326574	0.00224334	0.00284824	0.00230286	0.00125478
0.7	0.00376161	0.00430926	-0.000827887	0.00293113	0.00395953	0.00321642	0.00233902	0.00291333	0.00223769	0.00119086
0.71	0.00389215	0.00411998	-0.000819144	0.00293594	0.00401391	0.00313133	0.00243918	0.00300319	0.00217586	0.00115404
0.72	0.00401565	0.00393548	-0.000840866	0.00291408	0.0040609	0.00302407	0.00252781	0.00307705	0.00213251	0.00113749
0.73	0.00415695	0.00373858	-0.000828619	0.00292205	0.00408443	0.00294646	0.00262028	0.00317134	0.00209446	0.00112972
0.74	0.00431196	0.00354686	-0.000845181	0.00291544	0.00411755	0.00283982	0.00270759	0.00325966	0.00204506	0.0011308
0.75	0.00446484	0.00336935	-0.000888678	0.00293478	0.00414824	0.00273821	0.00278791	0.00335755	0.00201722	0.00116546
0.76	0.00465263	0.00314855	-0.000885988	0.00294154	0.00416633	0.00264422	0.00287753	0.00346342	0.00195633	0.00119857
0.77	0.004839	0.00296251	-0.000900481	0.00297484	0.00419059	0.00253761	0.00296562	0.00358952	0.00189094	0.00120903
0.78	0.00501646	0.00276607	-0.000909177	0.00297525	0.0042351	0.00242576	0.00306226	0.00371227	0.00182582	0.00123069
0.79	0.0051885	0.00260667	-0.000909553	0.00299354	0.00431589	0.00230029	0.00317835	0.00383407	0.00177221	0.00128122
0.8	0.00534816	0.00241151	-0.000904712	0.00303419	0.00441728	0.00216406	0.00329988	0.00398256	0.00171086	0.00131864
0.81	0.00551416	0.00223237	-0.000893013	0.0030779	0.0045259	0.00201049	0.00340706	0.0041171	0.00165289	0.0013539
0.82	0.00569444	0.00204642	-0.000917208	0.00314328	0.00461819	0.00187318	0.00352828	0.00424649	0.00159896	0.00140101
0.83	0.00585865	0.00186079	-0.000917329	0.00321814	0.00474056	0.00175074	0.0036523	0.00439463	0.00152736	0.00145194
0.84	0.0060018	0.00170797	-0.000888938	0.0033088	0.00488058	0.00161475	0.00374773	0.0045642	0.00144637	0.00150512
0.85	0.00615934	0.00157525	-0.00089161	0.00342427	0.00498635	0.00150009	0.0038265	0.00469486	0.00138028	0.00155078
0.86	0.00631293	0.00143268	-0.000871763	0.00351443	0.00509726	0.00140299	0.00392791	0.00484839	0.00127493	0.0016055
0.87	0.00645462	0.00130277	-0.000840984	0.00358874	0.00524647	0.00133101	0.00403688	0.00499715	0.00117663	0.00164612
0.88	0.00660153	0.00114133	-0.000799592	0.00368584	0.00535067	0.00123103	0.00412363	0.005138	0.00110431	0.00170605
0.89	0.00672919	0.000943795	-0.000764826	0.00377543	0.00544972	0.00114991	0.00421943	0.00528839	0.00103177	0.00176606
0.9	0.00685109	0.000769954	-0.000724331	0.00386244	0.00556284	0.00105844	0.0043345	0.00545038	0.000960595	0.0018305
0.91	0.00698522	0.000598562	-0.000722341	0.00396306	0.00562917	0.00097431	0.0044168	0.00559007	0.000907425	0.0018731
0.92	0.00713905	0.000432383	-0.000697821	0.00406355	0.00571487	0.000902356	0.00451085	0.00572713	0.000864161	0.00193827
0.93	0.00729663	0.000247164	-0.000667942	0.00418065	0.00581578	0.000834276	0.00458803	0.00586131	0.000808564	0.00200686
0.94	0.00744266	3.70383e-05	-0.000667348	0.00428769	0.00590201	0.000747633	0.00465474	0.00599775	0.000755542	0.00205184
0.95	0.00760126	-0.000177685	-0.000665511	0.00440327	0.00599577	0.000692035	0.00472762	0.00612128	0.000730997	0.00213713
0.96	0.00774293	-0.000405602	-0.000652785	0.00451602	0.00610357	0.000621828	0.00479302	0.00625146	0.000700643	0.002219
0.97	0.00788993	-0.000646041	-0.000641946	0.00464691	0.00618678	0.0005332	0.00485303	0.00638917	0.000660884	0.00230155
0.98	0.00804238	-0.000862885	-0.000645403	0.00475114	0.00629243	0.000465494	0.00490638	0.00651325	0.000622397	0.00236485
0.99	0.00819896	-0.00108231	-0.000637747	0.00487859	0.00645148	0.000380685	0.00497277	0.00663113	0.000594022	0.00244546

## Sheet: EGFR_GRB2_after
	cell#1	cell#2	cell#3	cell#4	cell#5	cell#6	cell#7	cell#8	cell#9	cell#10
0.01	0.0010803	0.00169937	5.48055e-05	0.0015171	0.00114752	0.00166133	0.0010524	0.00152515	-0.0003381	0.000390492
0.02	0.00221439	0.00322895	0.00169466	0.00318976	0.00225007	0.00356671	0.0030598	0.00319083	0.00122428	0.00130556
0.03	0.00326665	0.00458616	0.00292254	0.00467094	0.0033023	0.00524211	0.00461974	0.00478371	0.00229715	0.00210479
0.04	0.00414577	0.0058246	0.0038436	0.00608376	0.00426125	0.00695293	0.00590941	0.0061832	0.00311255	0.00282024
0.05	0.00499831	0.00686785	0.00476249	0.00709566	0.00515969	0.00832713	0.00732522	0.00742305	0.00351741	0.0035626
0.06	0.00579868	0.00779145	0.00533024	0.00803314	0.00600579	0.00941336	0.00835123	0.00842418	0.00397462	0.00412089
0.07	0.00641449	0.00858574	0.00595432	0.00872876	0.00670855	0.0104656	0.00928419	0.00923354	0.00415547	0.00463492
0.08	0.00697772	0.00923283	0.00637022	0.00934447	0.00740499	0.0112942	0.0100502	0.00993073	0.0047322	0.00510245
0.09	0.00737545	0.00980613	0.0067296	0.00987169	0.00795471	0.0121347	0.0107858	0.0106031	0.00512291	0.00541121
0.1	0.00774122	0.0103569	0.00691955	0.0103271	0.00844839	0.0126665	0.0112948	0.0111814	0.00548257	0.00570847
0.11	0.00800215	0.0108736	0.00717264	0.0106701	0.00884761	0.0132469	0.0117975	0.0117534	0.00583142	0.00593445
0.12	0.00824553	0.0112723	0.00730028	0.0109203	0.00918093	0.0137226	0.0120806	0.0122151	0.00599907	0.00607972
0.13	0.00841711	0.0116343	0.00741319	0.0110738	0.00947667	0.0141471	0.012327	0.0125817	0.00621181	0.00616849
0.14	0.00861049	0.0119458	0.00745902	0.0112263	0.00972896	0.0144959	0.0124854	0.0128326	0.00656288	0.00622293
0.15	0.00874205	0.0122038	0.00751831	0.0113472	0.00997164	0.0147361	0.0127386	0.0130851	0.0069218	0.00629864
0.16	0.00884948	0.0124731	0.00762643	0.0113725	0.0101842	0.0149836	0.0129184	0.0133084	0.007312	0.00628514
0.17	0.00893223	0.0126994	0.00754524	0.0113917	0.010351	0.0152094	0.0130702	0.0134645	0.00743981	0.00620039
0.18	0.00902578	0.0129108	0.0075201	0.0114491	0.0105044	0.0153819	0.0131116	0.0136139	0.00748952	0.00613257
0.19	0.00910522	0.0131018	0.00743004	0.0114654	0.0106294	0.0155696	0.0131985	0.0137287	0.00759595	0.00601088
0.2	0.00919437	0.0132217	0.0072975	0.0114849	0.0106941	0.0157077	0.0132235	0.0138799	0.00761367	0.00592187
0.21	0.00921686	0.0133219	0.00715704	0.0114111	0.0107255	0.0157369	0.0131683	0.0139749	0.0076358	0.00584512
0.22	0.00926286	0.0134029	0.00707166	0.0113452	0.0107605	0.0157498	0.0130894	0.0141448	0.0075906	0.00580494
0.23	0.00923888	0.0134971	0.0069078	0.0112928	0.0107622	0.0156845	0.0130841	0.0143155	0.00750506	0.00570755
0.24	0.00922258	0.0135513	0.00676711	0.011219	0.0107229	0.0156021	0.0130492	0.0144163	0.00750642	0.00563898
0.25	0.00918802	0.0135287	0.00659635	0.0111274	0.010704	0.0156037	0.0130215	0.014536	0.00753879	0.00559283
0.26	0.00917037	0.0134738	0.00639392	0.0110715	0.0106336	0.0155789	0.0129729	0.0146364	0.0075631	0.00555587
0.27	0.0091349	0.01349	0.00624965	0.0109998	0.0105677	0.0154505	0.0128409	0.014706	0.00747199	0.00547259
0.28	0.00909105	0.0135163	0.00602519	0.0109094	0.0104858	0.0152874	0.0128318	0.0146724	0.0073775	0.0054033
0.29	0.00902729	0.013505	0.00570377	0.0107906	0.0103791	0.0151971	0.0127138	0.014619	0.00717082	0.00536163
0.3	0.00896679	0.0134792	0.0055137	0.0106675	0.0102779	0.0149994	0.0125425	0.0145845	0.0069114	0.0053279
0.31	0.00888409	0.0133803	0.00525126	0.0105083	0.0101749	0.0148569	0.0123941	0.0144898	0.00666049	0.00528081
0.32	0.00880376	0.0133139	0.00502465	0.01036	0.0100535	0.0146283	0.0121909	0.0143885	0.00650202	0.00522476
0.33	0.0087253	0.0132199	0.00487252	0.0102138	0.00992048	0.0143933	0.0120415	0.0142729	0.00633607	0.00519029
0.34	0.00863558	0.0130784	0.00460356	0.010046	0.0097667	0.014124	0.0119187	0.0140992	0.00611459	0.00514216
0.35	0.0085333	0.0129543	0.00435279	0.00984739	0.00961092	0.0138156	0.0117292	0.0138853	0.00604462	0.00511784
0.36	0.0084351	0.012824	0.00410267	0.00964729	0.00946599	0.0135084	0.0115459	0.0137309	0.00593437	0.00508362
0.37	0.00835248	0.0126752	0.00388427	0.00945368	0.00932838	0.0131874	0.0113844	0.013627	0.00589323	0.00503989
0.38	0.00824853	0.0125044	0.00369244	0.00922903	0.0091797	0.0128926	0.0112198	0.0134361	0.00576012	0.0050176
0.39	0.00810176	0.0123044	0.00354817	0.00898755	0.0090188	0.0126072	0.0110703	0.0132823	0.00568227	0.00495825
0.4	0.00798266	0.0121214	0.00336458	0.00879524	0.00887129	0.0123158	0.0108683	0.0131347	0.00566142	0.00494492
0.41	0.00786197	0.0119539	0.00327097	0.00854673	0.0087313	0.0120352	0.0105695	0.012955	0.00547449	0.00484752
0.42	0.00774715	0.0117593	0.00308676	0.00833043	0.00858196	0.0116987	0.0103169	0.0127523	0.00537501	0.00481489
0.43	0.00763174	0.0115841	0.00290474	0.00809646	0.00843814	0.0113658	0.0100483	0.0124704	0.00532273	0.00473184
0.44	0.00751282	0.0114161	0.00281187	0.00788099	0.00830981	0.0110889	0.00979987	0.0122718	0.00523556	0.00464302
0.45	0.00739439	0.0112814	0.00275521	0.00764868	0.00817883	0.0108019	0.00953462	0.0120522	0.0051089	0.00457967
0.46	0.00728714	0.0111288	0.0026456	0.00741238	0.0080451	0.010517	0.00936045	0.0117896	0.00494853	0.00449644
0.47	0.00717626	0.0109837	0.00262348	0.00718932	0.0079299	0.0102251	0.0090812	0.0115739	0.00476547	0.00444327
0.48	0.00708105	0.0108473	0.00253062	0.00699051	0.00781046	0.0099679	0.00891134	0.0113598	0.00456079	0.00440704
0.49	0.00700177	0.010735	0.00249425	0.00677785	0.00767951	0.00973767	0.00873008	0.0111582	0.00446417	0.00441058
0.5	0.00693211	0.0105666	0.00246054	0.00655093	0.0075474	0.00948482	0.00853425	0.0109266	0.00437834	0.00437602
0.51	0.00686047	0.010421	0.0023319	0.00634258	0.0074194	0.00924194	0.0083959	0.0107136	0.00434619	0.00433034
0.52	0.00677785	0.0103071	0.00222374	0.00614561	0.00726743	0.00901467	0.00821853	0.0104985	0.00429813	0.00433052
0.53	0.00671079	0.0101638	0.00210655	0.00594255	0.00711066	0.00878444	0.00801521	0.0102579	0.00422187	0.00431845
0.54	0.00662162	0.0100076	0.00199432	0.00572207	0.00696332	0.00851685	0.00778358	0.0100627	0.00418878	0.00431856
0.55	0.00654221	0.00987909	0.00187304	0.00551328	0.00680643	0.00826623	0.00755965	0.00988275	0.00414216	0.00427842
0.56	0.00647342	0.009696	0.00184233	0.00535813	0.00665236	0.00804953	0.00735226	0.00963685	0.00414857	0.00423724
0.57	0.0063968	0.0095365	0.00173782	0.00517323	0.00650938	0.00784395	0.0072155	0.00940026	0.0040872	0.00420169
0.58	0.00632261	0.009368	0.00169582	0.00501341	0.00637501	0.00762309	0.00710446	0.00910677	0.00402937	0.00413461
0.59	0.0062324	0.00919328	0.00165756	0.00485806	0.00624578	0.00742047	0.00697402	0.00889557	0.0039977	0.00409156
0.6	0.00612094	0.00901298	0.00169242	0.00469301	0.00611442	0.00726306	0.00691037	0.00867733	0.00397359	0.0040918
0.61	0.00603289	0.00880325	0.00172009	0.00454637	0.00602213	0.00711355	0.00686757	0.00851766	0.00397461	0.00404793
0.62	0.00593278	0.00857037	0.00173899	0.00438568	0.00590458	0.0069333	0.00679188	0.00835646	0.00397075	0.0040191
0.63	0.00585616	0.00834356	0.00169439	0.00422786	0.00581567	0.00673639	0.00669965	0.00813963	0.00403709	0.00397127
0.64	0.005777	0.00812006	0.00160128	0.00408627	0.00574191	0.00661444	0.00660613	0.00796726	0.00412004	0.00394753
0.65	0.00570352	0.00794501	0.00155263	0.00393167	0.00568487	0.00648466	0.0065044	0.00777716	0.00415787	0.00390732
0.66	0.00563372	0.00773122	0.00152635	0.00374561	0.00563698	0.00637102	0.00638074	0.00759989	0.00424021	0.00385546
0.67	0.0055668	0.00755614	0.00144836	0.00356792	0.005609	0.00629311	0.00636017	0.00747627	0.00426371	0.00383699
0.68	0.00551077	0.00739446	0.00138545	0.00341559	0.00558494	0.00623482	0.00627804	0.00733783	0.00427491	0.00381424
0.69	0.0054329	0.00723221	0.00132275	0.00327027	0.00557966	0.00615087	0.00622687	0.00723038	0.00420089	0.00377266
0.7	0.00538339	0.00707359	0.00133794	0.00313217	0.00558844	0.00611303	0.00615974	0.0071275	0.00410214	0.0037478
0.71	0.00532803	0.006918	0.00137361	0.00300786	0.00561728	0.00606915	0.00609563	0.00703877	0.00406379	0.00375234
0.72	0.00529087	0.00675948	0.00136687	0.00288057	0.00564147	0.00603691	0.00601267	0.00694044	0.00396652	0.00374036
0.73	0.00524655	0.00662426	0.00141118	0.00272257	0.00565957	0.0059558	0.00590067	0.00688733	0.00390119	0.00375858
0.74	0.0051981	0.00647556	0.00140924	0.00258045	0.00567254	0.00589314	0.0057556	0.00687455	0.00388734	0.00378314
0.75	0.00514834	0.00628807	0.00136656	0.00240979	0.00566178	0.00580643	0.00564855	0.00687882	0.00384027	0.00377924
0.76	0.00512677	0.0061442	0.00136241	0.0022536	0.00565841	0.00576369	0.00548457	0.00687689	0.00382155	0.00379257
0.77	0.00509604	0.00598101	0.0013721	0.00211319	0.00563363	0.00567329	0.00531718	0.00691277	0.00378355	0.00382966
0.78	0.00505993	0.00581203	0.0013867	0.00197783	0.0056105	0.00557309	0.00519128	0.00696892	0.00378502	0.00388422
0.79	0.00503745	0.00564736	0.00136454	0.00186831	0.00558264	0.00551947	0.00508008	0.00702619	0.00378013	0.00394232
0.8	0.00500408	0.0055069	0.00137713	0.00171978	0.00555364	0.0054084	0.00496005	0.00703951	0.00380286	0.00400689
0.81	0.00498577	0.00537048	0.00140062	0.00156397	0.00553357	0.00530206	0.0048618	0.00706671	0.00383834	0.00408912
0.82	0.00496066	0.00522175	0.00146373	0.00141311	0.00552275	0.00523202	0.00477358	0.00706438	0.00387972	0.00417553
0.83	0.00496267	0.00512345	0.00152483	0.00126291	0.00549493	0.00509517	0.00468092	0.00709978	0.00396549	0.00424914
0.84	0.00496795	0.00501077	0.00166648	0.00113162	0.00548067	0.00494966	0.00460754	0.00709073	0.00405953	0.00431762
0.85	0.00497671	0.00490554	0.00180221	0.000983105	0.00546508	0.004805	0.00455015	0.00707312	0.00411019	0.00439281
0.86	0.00498347	0.00477477	0.00191597	0.000859184	0.00546207	0.0046534	0.00451759	0.00710193	0.00423439	0.00448989
0.87	0.00499253	0.00464601	0.00206971	0.000729747	0.00543651	0.00455127	0.00444722	0.00707659	0.00424309	0.00458568
0.88	0.00499411	0.00453299	0.00226554	0.000611935	0.00541878	0.00446218	0.00435874	0.0070484	0.00430881	0.00467823
0.89	0.00501432	0.00440134	0.00241017	0.000473129	0.00539334	0.00432865	0.00427708	0.00704755	0.00436513	0.00476738
0.9	0.0050417	0.00426757	0.00264133	0.000356538	0.00537009	0.00421538	0.00419942	0.00703802	0.00440363	0.00484998
0.91	0.00507978	0.004156	0.0028445	0.000224132	0.00534111	0.00410735	0.00412127	0.00705973	0.00448471	0.00492825
0.92	0.00511126	0.00406403	0.00302078	7.80532e-05	0.00531316	0.00400954	0.00398103	0.00705968	0.00460486	0.00501789
0.93	0.0051409	0.00395127	0.00321723	-5.57422e-05	0.00528872	0.00389327	0.00390021	0.00707883	0.00469304	0.00509786
0.94	0.00516181	0.00387202	0.00335985	-0.000205994	0.00527563	0.00378917	0.00379486	0.00714406	0.00485692	0.00515279
0.95	0.0051833	0.00380594	0.00347832	-0.000382687	0.005258	0.00367354	0.00368156	0.00719318	0.0050082	0.00522397
0.96	0.00522256	0.00374498	0.00363394	-0.000537778	0.00524108	0.00355739	0.00356105	0.00729081	0.00520632	0.00528406
0.97	0.00525223	0.00369013	0.00377711	-0.000678665	0.00522511	0.00350891	0.00354289	0.00739846	0.00534007	0.00533649
0.98	0.00526533	0.00366051	0.00393448	-0.000806014	0.00522588	0.00340229	0.00351582	0.00752487	0.00543937	0.00539237
0.99	0.005273	0.00364148	0.00405208	-0.000932774	0.00523016	0.0033535	0.00345707	0.00766721	0.00556246	0.00543441
