# Supplementary material for: Bilateral regulation of EGFR activity and local PI(4,5)P2 dynamics in mammalian cells observed with superresolution microscopy
Source: eLife journal article supplement (doi:10.7554/elife.101652), 2024-10-09
Supplement: fig2-data1 [file Figure 2G.xlsx]

## Sheet: EGFR_PI(3,4,5)P3_before
	cell#1	cell#2	cell#3	cell#4	cell#5	cell#6	cell#7	cell#8	cell#9	cell#10
0.01	0.000102308	-0.000512501	0.000200137	0.000470561	-0.000352383	0.000442676	0.000994342	-0.000123602	-0.000145043	0.000355649
0.02	0.000202324	-6.55818e-05	0.000376964	0.00101448	-0.000103278	0.00117917	0.00202557	0.000136883	0.000561039	0.000695663
0.03	0.000285505	5.42835e-05	0.000506462	0.00146982	-0.000142215	0.00153576	0.00306739	0.000375868	0.00108518	0.00112799
0.04	0.000417256	0.000214242	0.000675617	0.00193026	-6.21644e-05	0.00195176	0.00406002	0.000744584	0.00141372	0.00146388
0.05	0.000520328	0.000199186	0.000855042	0.00231858	5.50122e-05	0.00244053	0.00491202	0.00106444	0.00163749	0.00175588
0.06	0.000664309	0.000289473	0.00103361	0.00270537	3.11246e-05	0.00295255	0.00581285	0.00128583	0.00187138	0.00206917
0.07	0.000765018	0.000593977	0.00120086	0.00308968	7.63267e-05	0.00338917	0.00656128	0.00168816	0.00199949	0.00240634
0.08	0.000871856	0.000805509	0.00135029	0.00348064	0.000111951	0.00385099	0.00733032	0.00190709	0.00221628	0.00270637
0.09	0.00096045	0.000986123	0.00150942	0.00384686	0.000292219	0.00422089	0.00803163	0.00225204	0.00250059	0.0030139
0.1	0.00106284	0.00105866	0.00167073	0.00416899	0.000418759	0.00452297	0.00861809	0.00231284	0.00270451	0.00323748
0.11	0.00113455	0.00112567	0.00177888	0.00443694	0.000473743	0.0048826	0.00924102	0.00236208	0.00284078	0.00350017
0.12	0.0012153	0.00106685	0.00189265	0.00469272	0.000527722	0.00514233	0.00974659	0.00266502	0.00299744	0.00374089
0.13	0.00129633	0.00106245	0.00198256	0.00493873	0.000520002	0.00540622	0.0101779	0.00286695	0.00313533	0.00394138
0.14	0.00136739	0.00122291	0.00205645	0.00513561	0.000589249	0.00570055	0.010637	0.00292232	0.00327602	0.00415041
0.15	0.00143899	0.00132226	0.00215514	0.0053239	0.000694823	0.00585803	0.0110324	0.00301931	0.00343957	0.00435923
0.16	0.00150532	0.00142003	0.00223542	0.00551295	0.000711793	0.00606863	0.0113639	0.00309929	0.00358854	0.00455931
0.17	0.00155179	0.00152398	0.00231637	0.00567811	0.00087708	0.00630429	0.0116786	0.00318254	0.00365959	0.00474016
0.18	0.001602	0.00160296	0.00239581	0.00583297	0.000905456	0.00644959	0.0119523	0.00337222	0.00376883	0.00490209
0.19	0.00165619	0.00165934	0.00245401	0.00598302	0.00109062	0.00655373	0.012193	0.0034972	0.0038075	0.00504352
0.2	0.00165616	0.00174765	0.00251494	0.00611184	0.00110724	0.00677277	0.012423	0.00359604	0.0038272	0.00515043
0.21	0.00169283	0.00185118	0.00257853	0.0062307	0.00116862	0.00694559	0.0125954	0.00360021	0.00388235	0.00522869
0.22	0.00172097	0.00193112	0.00262147	0.00631082	0.00121249	0.00706484	0.0127246	0.00359139	0.00392024	0.0053283
0.23	0.00174513	0.00195845	0.00267442	0.00639534	0.0012335	0.0072102	0.0128423	0.00366102	0.00390332	0.00541238
0.24	0.00178392	0.0019465	0.00272148	0.00646759	0.00133229	0.00728106	0.0129293	0.0036681	0.00392377	0.00548559
0.25	0.00182223	0.00193545	0.00273571	0.00654862	0.00136508	0.00744543	0.0130154	0.00367696	0.00403092	0.00555356
0.26	0.00184259	0.00197213	0.00276466	0.00660773	0.00140776	0.00757155	0.0130708	0.00367851	0.00406819	0.0056104
0.27	0.00185679	0.00198911	0.0027872	0.00665918	0.00146912	0.00768115	0.0131307	0.00368202	0.00403922	0.00564241
0.28	0.00187654	0.00202473	0.00281066	0.00670027	0.00152336	0.00780571	0.013145	0.00358439	0.00404633	0.00570215
0.29	0.00190404	0.0020631	0.00283478	0.006768	0.00151516	0.00790822	0.0131356	0.00362155	0.00393445	0.00574768
0.3	0.00193068	0.00210202	0.00285791	0.00681034	0.00151445	0.00795265	0.0131331	0.00375806	0.00391051	0.00576782
0.31	0.00192819	0.00199999	0.00286611	0.00684273	0.00154404	0.00802097	0.0131199	0.00378199	0.00384655	0.00577324
0.32	0.00194741	0.00203261	0.00287592	0.00688028	0.00149699	0.00808477	0.0130698	0.00378126	0.00385155	0.00577435
0.33	0.00198311	0.00201504	0.00287631	0.00690068	0.0015102	0.00818717	0.013012	0.0038244	0.00383938	0.00578995
0.34	0.00201207	0.00192504	0.002921	0.0069164	0.00154414	0.00821093	0.0129687	0.00381846	0.00382644	0.0057973
0.35	0.00203081	0.0018923	0.00292198	0.00693841	0.0015439	0.00825021	0.0129145	0.00381931	0.0038354	0.00580602
0.36	0.0020644	0.00192006	0.00295441	0.00695239	0.00157774	0.00829053	0.0128254	0.00387256	0.00385767	0.00580307
0.37	0.00210501	0.00190501	0.00295099	0.00696752	0.00167235	0.00836643	0.0127547	0.00388122	0.00381577	0.00583654
0.38	0.00211457	0.00193693	0.00296471	0.00696759	0.00174621	0.00842405	0.0127015	0.00387936	0.00389488	0.00584644
0.39	0.00213665	0.00191491	0.00295771	0.00696103	0.00175262	0.008442	0.0126127	0.00388025	0.00392798	0.00585373
0.4	0.00214315	0.00185505	0.00297419	0.00695317	0.00185577	0.00851533	0.0125354	0.00390565	0.0039468	0.0058796
0.41	0.00214125	0.00183794	0.0029855	0.00695392	0.00187416	0.00861232	0.0124403	0.00388045	0.00396597	0.00588185
0.42	0.00214946	0.00180251	0.00300255	0.00694205	0.00195032	0.00864959	0.0123538	0.00390268	0.00402328	0.00589563
0.43	0.00215981	0.00179308	0.00300801	0.00691534	0.00201449	0.00865172	0.012242	0.00393957	0.00407181	0.00592206
0.44	0.00216605	0.00172289	0.00301367	0.00688978	0.00205532	0.00868393	0.0121572	0.0039806	0.00408531	0.00594012
0.45	0.00215929	0.00170462	0.00302873	0.0068613	0.00212113	0.00870415	0.0120626	0.0039939	0.00408076	0.00595987
0.46	0.00215865	0.00176018	0.00304265	0.00684713	0.00218721	0.00869611	0.0119454	0.00406351	0.00412208	0.00598904
0.47	0.00217578	0.00177946	0.00306576	0.00683596	0.00223742	0.00871317	0.0118614	0.00402449	0.00417044	0.00598079
0.48	0.00219503	0.00181063	0.00308546	0.00681318	0.00225812	0.00873659	0.0117789	0.00406899	0.00418106	0.00600663
0.49	0.00220381	0.00179775	0.00310569	0.00677874	0.00234521	0.00879098	0.0116943	0.00407026	0.00421925	0.00602626
0.5	0.00221933	0.00183957	0.00313949	0.00676185	0.00240328	0.00884704	0.0116343	0.00409673	0.00427806	0.00604545
0.51	0.00223338	0.00180544	0.00317436	0.00674657	0.00241498	0.0089116	0.0115507	0.00419278	0.0043567	0.00606813
0.52	0.00224789	0.00182424	0.00318926	0.0067266	0.00243342	0.00896458	0.0114828	0.00421663	0.00436147	0.00608491
0.53	0.00226901	0.00180348	0.00323029	0.00669766	0.00250595	0.0090047	0.0114192	0.00426778	0.00441934	0.00611041
0.54	0.00228784	0.0018708	0.00327023	0.00666195	0.00250884	0.00904097	0.0113722	0.00437642	0.0044029	0.0061309
0.55	0.00230164	0.00186902	0.00330255	0.00664127	0.00254053	0.00906607	0.0113077	0.00441084	0.00444904	0.0061569
0.56	0.00231677	0.00188637	0.0033346	0.00661625	0.0025787	0.00910496	0.0112494	0.00442669	0.00448269	0.00617939
0.57	0.00233407	0.00187961	0.00338722	0.00659207	0.00260836	0.00915492	0.0111708	0.00453987	0.00451828	0.0061993
0.58	0.00233854	0.00189686	0.00343001	0.00656449	0.0026607	0.00920236	0.011112	0.00460225	0.00460048	0.00621091
0.59	0.00234757	0.0019239	0.00345505	0.00655761	0.00263957	0.00924098	0.011044	0.00466864	0.00466234	0.00621894
0.6	0.00236535	0.00187823	0.00349261	0.00653424	0.00269308	0.00926069	0.010981	0.00480608	0.00473245	0.00623074
0.61	0.00236403	0.00190726	0.00352129	0.00651935	0.00272996	0.00929484	0.0109203	0.00489053	0.00481716	0.0062459
0.62	0.00237869	0.00189523	0.00355952	0.00651212	0.00272456	0.0092971	0.0108477	0.00497442	0.00490596	0.00626081
0.63	0.00239098	0.00188022	0.00361209	0.00650549	0.00280807	0.00932156	0.0107868	0.00500862	0.004997	0.00628812
0.64	0.00242249	0.00189038	0.00364508	0.00649153	0.00283824	0.00935851	0.0107121	0.00515382	0.00503947	0.0063116
0.65	0.00244334	0.00191707	0.00368425	0.00650003	0.00287528	0.00939009	0.0106546	0.00525817	0.00509041	0.00632109
0.66	0.00247256	0.00193489	0.00371685	0.00649052	0.0028973	0.00939214	0.0105778	0.00535382	0.00513307	0.00632543
0.67	0.00249264	0.00202072	0.00376663	0.00649213	0.00295848	0.0094311	0.0105041	0.00545145	0.00516242	0.00631143
0.68	0.00250721	0.002116	0.00380671	0.00649612	0.00292598	0.00946855	0.0104286	0.00555453	0.00518333	0.00629899
0.69	0.00253548	0.0022175	0.00382815	0.0064798	0.00295455	0.00946156	0.0103553	0.00565082	0.00518842	0.00630374
0.7	0.00256365	0.00232213	0.00385679	0.00648884	0.00299794	0.00946219	0.0102758	0.00572034	0.00512047	0.00630724
0.71	0.0026002	0.00235901	0.0039047	0.00649469	0.00300929	0.00950288	0.0101699	0.00581711	0.00511849	0.00632556
0.72	0.00262012	0.00245262	0.0039441	0.00649239	0.00303654	0.00951026	0.010089	0.00592294	0.00510835	0.00630921
0.73	0.00264184	0.00249458	0.0040021	0.00651614	0.00302761	0.0095191	0.0100071	0.00591988	0.00511989	0.00632045
0.74	0.00264454	0.00256646	0.00405467	0.00653163	0.00306632	0.00953341	0.00993028	0.0059962	0.00510033	0.00632546
0.75	0.00266072	0.00259638	0.00410608	0.00655256	0.00311428	0.00953142	0.00985448	0.00602859	0.0051036	0.00631848
0.76	0.00268224	0.0026065	0.00415657	0.00655382	0.0030878	0.00954929	0.00978326	0.00614425	0.00507268	0.00631585
0.77	0.00269395	0.00266335	0.00421485	0.00656896	0.00313252	0.00954144	0.00970553	0.00623884	0.00508358	0.00632044
0.78	0.00270044	0.00267278	0.00427478	0.00658837	0.00316775	0.00952873	0.00962921	0.00631263	0.00511794	0.00631596
0.79	0.00270941	0.00269019	0.00433105	0.00659067	0.00320328	0.00954195	0.00955445	0.00637064	0.0051335	0.00631681
0.8	0.00273649	0.00274103	0.00438576	0.00658995	0.00324607	0.00954813	0.0094931	0.00643172	0.00521443	0.00628839
0.81	0.00274624	0.00277306	0.0044464	0.00658943	0.00328878	0.00961595	0.0094283	0.00648244	0.00525107	0.0062836
0.82	0.00275938	0.00280499	0.00451274	0.0066053	0.00323309	0.00963323	0.00935653	0.00651311	0.00529513	0.00627521
0.83	0.00276782	0.00289249	0.00457706	0.00660926	0.00326133	0.00962546	0.00929167	0.00651176	0.00538295	0.00625935
0.84	0.0027847	0.00290874	0.00465131	0.00663156	0.00327811	0.00961636	0.00922587	0.00655536	0.00546665	0.00623592
0.85	0.00279023	0.00295507	0.00470997	0.00665227	0.00331601	0.00964116	0.00916031	0.0065642	0.00557878	0.00621227
0.86	0.00280525	0.00303215	0.00477307	0.0066574	0.00331293	0.00967699	0.00909831	0.00654942	0.00564022	0.00618619
0.87	0.00281519	0.0031049	0.00484174	0.00665396	0.00332305	0.00969923	0.00901941	0.00660439	0.00572396	0.00616688
0.88	0.00281624	0.00314744	0.00490299	0.00667336	0.00331846	0.00971603	0.00894535	0.00655182	0.00575785	0.00615464
0.89	0.00282165	0.00317553	0.0049715	0.00668569	0.00331218	0.009736	0.00886548	0.00650503	0.00586237	0.00613557
0.9	0.00281871	0.00318943	0.00503778	0.00669518	0.00327873	0.00975237	0.00879725	0.00648483	0.00598077	0.00612276
0.91	0.0028128	0.00319202	0.00510542	0.00670186	0.00328231	0.00977564	0.00871671	0.00645452	0.00609503	0.00609596
0.92	0.0028151	0.00322028	0.00516247	0.00671289	0.00327323	0.00981064	0.00864857	0.00644153	0.00617993	0.00607618
0.93	0.00281215	0.00325123	0.00521807	0.00671539	0.00324851	0.00978688	0.00857638	0.00638067	0.00627981	0.00604984
0.94	0.00280379	0.00332061	0.00528799	0.00673748	0.00323677	0.00979869	0.00850663	0.0063296	0.00635917	0.00601697
0.95	0.00280134	0.00336746	0.00534804	0.00673993	0.0032541	0.00980063	0.00843329	0.00629551	0.00643156	0.00598989
0.96	0.00279445	0.00338177	0.00540666	0.00675205	0.00322897	0.00979275	0.00836479	0.00630402	0.00649334	0.00595223
0.97	0.00277656	0.00343203	0.00546792	0.0067643	0.003218	0.00978163	0.00829461	0.00628698	0.0065543	0.00591673
0.98	0.00275243	0.00346149	0.00552761	0.00677123	0.00323285	0.00976735	0.00822965	0.00628536	0.00665276	0.00587577
0.99	0.00273398	0.00352569	0.00559797	0.00677799	0.00326877	0.00975826	0.0081404	0.00630515	0.00667838	0.00583612

## Sheet: EGFR_PI(3,4,5)P3_after
	cell#1	cell#2	cell#3	cell#4	cell#5	cell#6	cell#7	cell#8	cell#9
0.01	0.000952036	0.000318088	0.000237113	0.0001676	0.000207419	0.000353225	0.000372429	0.000656273	0.000416774
0.02	0.00188628	0.000671808	0.000729797	0.000351365	0.000618073	0.000968386	0.000809808	0.00134525	0.000904715
0.03	0.00284378	0.000954924	0.000994249	0.000578487	0.000985908	0.00151984	0.00124846	0.00208514	0.0013624
0.04	0.00370993	0.00126318	0.00140574	0.000834853	0.0012568	0.00190289	0.0016517	0.00277852	0.00181441
0.05	0.00457783	0.00160973	0.00175744	0.00103978	0.0015069	0.00249206	0.00203062	0.00347784	0.00224226
0.06	0.00543771	0.00196711	0.00211658	0.00122414	0.00178116	0.00295005	0.00243284	0.00414166	0.00270998
0.07	0.00623324	0.00227739	0.00242655	0.00140686	0.00201875	0.00332063	0.00280789	0.0048338	0.00316261
0.08	0.00700936	0.0025249	0.00275088	0.00156036	0.00227523	0.00373819	0.00314627	0.00542255	0.00354272
0.09	0.00776021	0.00281624	0.00305848	0.00171601	0.00245947	0.00409518	0.00351414	0.00604035	0.00390204
0.1	0.00844431	0.00302514	0.00341277	0.00186377	0.0026718	0.00444004	0.00379769	0.00662918	0.00426839
0.11	0.00909805	0.00322399	0.00359521	0.00202828	0.00286612	0.00482563	0.00407749	0.00714928	0.00462378
0.12	0.00970759	0.00345992	0.00385165	0.00214907	0.00306407	0.00518573	0.00434318	0.00765416	0.00493373
0.13	0.0102948	0.00360847	0.00404048	0.00226981	0.0032709	0.00544687	0.00457933	0.00814611	0.00522212
0.14	0.0108244	0.00377514	0.00422108	0.00238892	0.00341638	0.00568153	0.00481579	0.00857455	0.00553963
0.15	0.0112972	0.0039242	0.00442592	0.00248609	0.00357396	0.00588135	0.00502026	0.00895929	0.00581007
0.16	0.0117399	0.00403634	0.00461658	0.00257274	0.00368873	0.00612603	0.00518824	0.00931696	0.00606953
0.17	0.0121317	0.00414	0.00474592	0.00265835	0.0038285	0.0063263	0.00535024	0.0096631	0.00628677
0.18	0.0124623	0.0042488	0.00491758	0.00275516	0.00392519	0.00647705	0.00547445	0.00995709	0.0064993
0.19	0.0127785	0.00433344	0.0050019	0.00284253	0.00403464	0.00669202	0.00558158	0.0102377	0.00670082
0.2	0.0130564	0.00442846	0.0051563	0.0029036	0.00411144	0.00684812	0.00567092	0.0105202	0.00685516
0.21	0.0132984	0.00449119	0.00526536	0.00295281	0.00417556	0.00699886	0.00573284	0.0107568	0.00699035
0.22	0.0135139	0.00453893	0.0053238	0.00302178	0.00424158	0.00709992	0.00579027	0.010966	0.00711794
0.23	0.0136996	0.00458033	0.00539672	0.00308784	0.0042928	0.00722379	0.00581201	0.0111236	0.00722332
0.24	0.0138294	0.00462736	0.00546351	0.00311575	0.00435821	0.00736412	0.00583283	0.0112565	0.00730687
0.25	0.0139311	0.0046283	0.00553957	0.00314441	0.0043937	0.00743227	0.00585324	0.0113811	0.00740714
0.26	0.0140035	0.00462619	0.00562105	0.00316665	0.00442503	0.00748426	0.00585626	0.0114888	0.0074892
0.27	0.014052	0.00462316	0.00567411	0.00318354	0.00445177	0.00756708	0.00584965	0.0115999	0.00755572
0.28	0.0140967	0.00463772	0.00573325	0.00320362	0.00446966	0.00762636	0.00582452	0.0117077	0.00758707
0.29	0.0140991	0.00465437	0.00577826	0.00322105	0.00448846	0.00767459	0.0058055	0.0117687	0.00762293
0.3	0.0140828	0.0046427	0.00578677	0.00322252	0.00449756	0.00768239	0.00576951	0.0118137	0.00766618
0.31	0.014046	0.00462676	0.00580031	0.00322633	0.00448924	0.00774883	0.00573031	0.0118376	0.00769714
0.32	0.0139869	0.00459222	0.00584764	0.0032172	0.00449128	0.0077598	0.00568776	0.0118393	0.00771856
0.33	0.0139237	0.00460295	0.00585218	0.00320495	0.0045026	0.00777532	0.0056409	0.0118156	0.00775131
0.34	0.0138314	0.00460306	0.00588079	0.00319222	0.00452671	0.00775254	0.00558223	0.0118186	0.0077591
0.35	0.0137348	0.004574	0.00588045	0.00318808	0.004521	0.00776269	0.00551965	0.0118047	0.00778825
0.36	0.0136332	0.00455614	0.00588069	0.00316712	0.00450618	0.00776054	0.00544605	0.011775	0.0077943
0.37	0.0135071	0.00454452	0.00586381	0.00316057	0.0044907	0.00776525	0.00538125	0.0117659	0.00778996
0.38	0.0133804	0.00453731	0.00585834	0.00312452	0.00445458	0.00772859	0.00531415	0.0117312	0.00778113
0.39	0.0132321	0.00451393	0.00585899	0.00309344	0.00444251	0.00768837	0.00524413	0.0117003	0.00777405
0.4	0.0130878	0.00448939	0.00586795	0.00306359	0.00441187	0.00765463	0.00517766	0.0116861	0.00779129
0.41	0.01294	0.00444963	0.00585552	0.00302993	0.00438666	0.00759515	0.00511173	0.0116671	0.00776172
0.42	0.0127717	0.00440125	0.00586415	0.00300634	0.00435123	0.00755901	0.00505116	0.0116602	0.0077387
0.43	0.0125878	0.00437587	0.00586039	0.00298287	0.00432591	0.00751418	0.00497599	0.0116249	0.00771105
0.44	0.0124104	0.00433773	0.00580922	0.0029636	0.00429638	0.00750257	0.00490989	0.0115893	0.00766939
0.45	0.012237	0.0043022	0.00578205	0.00292065	0.00427165	0.00743789	0.00485354	0.011552	0.00763121
0.46	0.0120544	0.00429079	0.00576974	0.00288305	0.00424719	0.00741905	0.00479688	0.0115254	0.00761097
0.47	0.0118691	0.0042605	0.00572735	0.00283522	0.00422908	0.00738001	0.00476531	0.0114751	0.00757026
0.48	0.0116856	0.00423948	0.00570408	0.00280073	0.00420094	0.00734018	0.00472612	0.0114377	0.00752188
0.49	0.0115177	0.00421096	0.00565129	0.0027643	0.00419073	0.0073018	0.00470462	0.0113888	0.00747069
0.5	0.0113211	0.00418273	0.00561888	0.00273252	0.00417376	0.007263	0.00466849	0.0113707	0.00741019
0.51	0.0111428	0.00415441	0.00562668	0.00269551	0.00413495	0.0072127	0.00464419	0.0113332	0.0073555
0.52	0.0109604	0.00410491	0.00560228	0.00267474	0.0041159	0.00716727	0.00462181	0.011292	0.00730976
0.53	0.0107714	0.00405858	0.00555658	0.0026468	0.0041205	0.00715013	0.00459478	0.0112533	0.00726501
0.54	0.0105833	0.00401377	0.00557242	0.00260965	0.00410641	0.00712331	0.00457595	0.0112096	0.00724164
0.55	0.0103903	0.00397053	0.00554673	0.00256604	0.00408428	0.00705784	0.0045566	0.0111884	0.00717943
0.56	0.0102094	0.0039184	0.00554151	0.00253268	0.00407083	0.00697793	0.00453868	0.0111538	0.007158
0.57	0.010012	0.00386308	0.00553938	0.00249947	0.00404707	0.0068923	0.00452196	0.0111388	0.00710466
0.58	0.00981824	0.00380928	0.00552867	0.00246185	0.00403366	0.00685596	0.00450728	0.0111156	0.00707519
0.59	0.00963115	0.00376552	0.00554195	0.00242766	0.00402579	0.00679235	0.00449124	0.0110384	0.00704157
0.6	0.00944471	0.00371216	0.00551671	0.00240255	0.00402705	0.00673984	0.00447762	0.0110149	0.00701519
0.61	0.0092594	0.00366842	0.00550343	0.00237127	0.00401428	0.00670634	0.00448649	0.0109659	0.00697666
0.62	0.00907583	0.00362215	0.00546662	0.00234726	0.00401707	0.0066681	0.00447611	0.0109238	0.00694267
0.63	0.00889399	0.00356338	0.00544574	0.00232081	0.0040181	0.00659413	0.00447039	0.0108801	0.00689744
0.64	0.0087085	0.00350751	0.00545515	0.00227924	0.00402513	0.00653577	0.00447175	0.0108255	0.00685113
0.65	0.00854229	0.00346549	0.00545013	0.00225007	0.00402702	0.00649822	0.00446951	0.0107926	0.00680918
0.66	0.0083764	0.00341364	0.00541993	0.00221926	0.00402905	0.00645241	0.00447506	0.0107616	0.00676737
0.67	0.0082114	0.00335049	0.0053776	0.0022009	0.00401233	0.00641437	0.00447022	0.0107253	0.00672652
0.68	0.00804275	0.00329652	0.00534575	0.00217278	0.00402558	0.00637901	0.00445949	0.0106966	0.00667861
0.69	0.00788155	0.0032327	0.00531244	0.00215651	0.00402384	0.00630537	0.00444444	0.0106684	0.00663404
0.7	0.00771457	0.00317812	0.00529852	0.00212976	0.00404424	0.00625543	0.0044361	0.0106167	0.00659674
0.71	0.0075634	0.00310906	0.00527473	0.00210662	0.00404452	0.00619205	0.00442998	0.010571	0.00654847
0.72	0.00741338	0.00303748	0.00525816	0.00207482	0.00402675	0.00611501	0.00442796	0.0105266	0.00649914
0.73	0.00726009	0.00298208	0.00525553	0.00204106	0.00402126	0.00607962	0.00443065	0.0104896	0.00645276
0.74	0.00712536	0.00293041	0.00523375	0.00202556	0.00402723	0.00603878	0.00442883	0.0104409	0.00641661
0.75	0.00697979	0.00288012	0.00523535	0.00200958	0.00401001	0.00600732	0.00443409	0.010408	0.00639218
0.76	0.00682949	0.00281744	0.00522261	0.00197912	0.00401326	0.00593887	0.00443259	0.0103955	0.00635698
0.77	0.00670114	0.00275455	0.00519536	0.00195097	0.00401775	0.00587702	0.00442322	0.0103772	0.00632348
0.78	0.00656503	0.00269403	0.00521607	0.00193485	0.00402418	0.00583914	0.00441039	0.0103527	0.00627888
0.79	0.00642861	0.00263604	0.00522338	0.00191361	0.00402715	0.00579042	0.00439763	0.0103341	0.00623468
0.8	0.00631109	0.00258691	0.00523717	0.00188445	0.00401275	0.00575842	0.00439122	0.010314	0.00618244
0.81	0.00617911	0.00253895	0.00524441	0.00185263	0.00402005	0.00571824	0.00439024	0.010287	0.0061397
0.82	0.00605323	0.00248943	0.00525558	0.00182161	0.0040207	0.00571564	0.00437592	0.010255	0.00607635
0.83	0.00593159	0.00244336	0.00525909	0.00179106	0.00401099	0.0056946	0.00435423	0.0102335	0.00602249
0.84	0.0058056	0.00238685	0.00524076	0.00175759	0.0040207	0.00568438	0.0043448	0.0102162	0.00596814
0.85	0.00567212	0.00232543	0.00525058	0.0017278	0.00400887	0.00565056	0.00433381	0.0101854	0.0059273
0.86	0.00554965	0.00228482	0.00522651	0.00169311	0.0040271	0.00561183	0.00431429	0.010152	0.00587123
0.87	0.00542557	0.00223227	0.00523679	0.00166115	0.00402105	0.00560447	0.00429142	0.0101166	0.00582978
0.88	0.00530555	0.00219558	0.00521426	0.00162811	0.00400353	0.00557409	0.00427879	0.0100713	0.00576728
0.89	0.00518244	0.00216003	0.00522801	0.0015912	0.00401341	0.00551722	0.00426826	0.0100354	0.00572395
0.9	0.00505147	0.00211686	0.00519763	0.00156167	0.00400618	0.00546638	0.00426075	0.00999505	0.00566596
0.91	0.00493316	0.00208426	0.00518877	0.00152464	0.00399605	0.00541546	0.00425338	0.00995416	0.00561217
0.92	0.00480759	0.0020455	0.00517164	0.00149991	0.00398042	0.00539471	0.00422777	0.00990942	0.00556312
0.93	0.00468624	0.00200795	0.0051434	0.00146711	0.00397316	0.00535636	0.00419942	0.00987297	0.00551922
0.94	0.00456097	0.00198068	0.00513455	0.00142918	0.00396294	0.0053285	0.00417783	0.00983175	0.00547092
0.95	0.00443269	0.00194811	0.00512001	0.00139458	0.00394093	0.00528642	0.00416013	0.0097635	0.00541714
0.96	0.00429511	0.00192924	0.00512269	0.00136109	0.00392469	0.00527572	0.00413775	0.00970213	0.00537709
0.97	0.00417057	0.00192139	0.00510955	0.0013359	0.00391455	0.00524242	0.00412051	0.00962502	0.00532026
0.98	0.00403089	0.00190581	0.00506967	0.00130529	0.0038987	0.00522699	0.00409337	0.00956237	0.00527118
0.99	0.00390093	0.00187159	0.00501216	0.00127376	0.00388599	0.00519213	0.0040643	0.00950728	0.0052233
