# Supplementary material for: Bilateral regulation of EGFR activity and local PI(4,5)P2 dynamics in mammalian cells observed with superresolution microscopy
Source: eLife journal article supplement (doi:10.7554/elife.101652), 2024-10-09
Supplement: fig6-data1 [file elife-101652-fig6-data1-v1.zip]

## Sheet: control
	cell#1	cell#2	cell#3	cell#4	cell#5	cell#6	cell#7
0.01	0.000314759	0.000598217	0.000274698	0.000468661	0.000634626	0.000218587	0.000683378
0.02	0.000743056	0.00132607	0.000528477	0.000991958	0.0012739	0.000479781	0.0013994
0.03	0.0010798	0.00196092	0.000709883	0.00150805	0.00189213	0.000704234	0.00207172
0.04	0.00143809	0.00262512	0.000984153	0.00199572	0.00248187	0.000963423	0.00267772
0.05	0.00179615	0.00324853	0.0012241	0.00242118	0.00308966	0.00120046	0.00326139
0.06	0.00213928	0.00385986	0.00141449	0.00287186	0.00366849	0.00145452	0.00386961
0.07	0.00246807	0.00443376	0.00162717	0.00330309	0.00421724	0.00168641	0.00442582
0.08	0.00279813	0.00498689	0.00180548	0.00372532	0.00473536	0.00190776	0.00493404
0.09	0.00315381	0.00550933	0.00199649	0.00413027	0.00523108	0.00214658	0.00537542
0.1	0.00347839	0.0059897	0.0021818	0.0045115	0.00567541	0.00236216	0.0058354
0.11	0.00378149	0.00644176	0.00235284	0.00484328	0.00608906	0.00257944	0.00628175
0.12	0.00408788	0.0068567	0.0025273	0.00514573	0.00646076	0.00279028	0.00661379
0.13	0.00439747	0.00723314	0.00268776	0.00546365	0.00683725	0.00300148	0.00691777
0.14	0.00468067	0.00759971	0.002881	0.00571943	0.00716404	0.00318095	0.00716473
0.15	0.00494328	0.00790543	0.00305262	0.00599185	0.00744882	0.00336254	0.00740996
0.16	0.0052166	0.00819216	0.00319639	0.00622268	0.00769293	0.00353449	0.00762488
0.17	0.00546893	0.00845269	0.00334681	0.00643472	0.00789489	0.00370808	0.0077909
0.18	0.00572372	0.00868575	0.0034835	0.00662164	0.00804854	0.00386717	0.00791487
0.19	0.00596969	0.00886083	0.00360267	0.00680061	0.0081773	0.00400241	0.00800239
0.2	0.00619255	0.00904334	0.00374674	0.00696617	0.00827069	0.00413703	0.0080632
0.21	0.00638648	0.00917408	0.00386966	0.00712159	0.00834729	0.00425537	0.0081001
0.22	0.00657451	0.00928167	0.00397042	0.0072561	0.00837659	0.0043564	0.00811721
0.23	0.0067455	0.00937682	0.00407299	0.0073686	0.0083993	0.00445171	0.00809291
0.24	0.00687706	0.00944252	0.00417204	0.00747895	0.0084038	0.00454116	0.00805889
0.25	0.00702021	0.00949363	0.00426098	0.00756258	0.00838784	0.00462458	0.00798945
0.26	0.00715203	0.00950739	0.00433355	0.00764047	0.00836376	0.00468906	0.00791971
0.27	0.00726064	0.00948198	0.00439038	0.00770285	0.00832034	0.0047347	0.0078301
0.28	0.00737131	0.00946466	0.00442727	0.00777185	0.00825398	0.00476503	0.00772636
0.29	0.00746707	0.0094151	0.00446358	0.00782183	0.00817188	0.00479443	0.00761631
0.3	0.00758198	0.0093369	0.00449506	0.00786048	0.00807538	0.00480766	0.00750523
0.31	0.00767278	0.00925008	0.00449885	0.00790492	0.0079729	0.00481649	0.00739851
0.32	0.00775708	0.00915932	0.00450137	0.00795495	0.00785587	0.00481191	0.00726625
0.33	0.00783275	0.00905995	0.00449727	0.0079865	0.00773131	0.00479723	0.00713017
0.34	0.00789852	0.00896216	0.00448532	0.00801508	0.00760108	0.00478168	0.00699713
0.35	0.0079596	0.00885063	0.00445872	0.00802246	0.00747086	0.00477399	0.00684596
0.36	0.00801743	0.00873839	0.00443755	0.00803377	0.00732693	0.00475141	0.00669173
0.37	0.00808557	0.00861653	0.0044037	0.00803352	0.00718227	0.00472584	0.00653576
0.38	0.00814119	0.0084968	0.00438755	0.00805395	0.00703415	0.00468556	0.00637003
0.39	0.00819654	0.0083635	0.0043597	0.0080561	0.00688364	0.00465327	0.00620837
0.4	0.00824298	0.0082398	0.00433074	0.00807166	0.00674159	0.00461535	0.00606219
0.41	0.00829178	0.00811998	0.0043091	0.00808276	0.00659556	0.00457244	0.00592101
0.42	0.00834536	0.00799764	0.00427927	0.00809503	0.00645313	0.00452451	0.00578168
0.43	0.00838825	0.0078807	0.0042463	0.00812136	0.00631401	0.00447412	0.00562056
0.44	0.00841293	0.00775318	0.00420074	0.00814906	0.00617967	0.00443181	0.00547108
0.45	0.00846031	0.00763417	0.00416982	0.00816215	0.00604636	0.00437616	0.00531507
0.46	0.00849142	0.00751462	0.00411909	0.00819505	0.0059119	0.0043201	0.00517868
0.47	0.00853279	0.00740144	0.00408656	0.00822013	0.00578672	0.00426182	0.00503884
0.48	0.00856188	0.00728595	0.0040408	0.00824114	0.0056555	0.00421489	0.00492326
0.49	0.00858518	0.00717444	0.00399382	0.00824776	0.00554477	0.00417036	0.00479432
0.5	0.00860586	0.00706527	0.00394675	0.00827175	0.00543492	0.00411623	0.00468007
0.51	0.00861866	0.0069568	0.00389902	0.00829203	0.00531851	0.00406362	0.00457455
0.52	0.00862413	0.00685535	0.00385092	0.00830971	0.00520528	0.00401543	0.00446454
0.53	0.00864559	0.00675014	0.00379902	0.00835093	0.00509664	0.0039621	0.00435433
0.54	0.00865948	0.00665387	0.00375908	0.00836934	0.00499363	0.00391422	0.00424615
0.55	0.00867558	0.00656126	0.00370905	0.00840104	0.00489392	0.00386553	0.00414599
0.56	0.00869088	0.00647679	0.003663	0.00843425	0.00480954	0.00381755	0.00404724
0.57	0.00869812	0.0063839	0.0036189	0.00846182	0.00471223	0.00377241	0.00394591
0.58	0.00872138	0.00629519	0.00358293	0.00849297	0.00462384	0.00373222	0.00385396
0.59	0.00875332	0.00621096	0.00353965	0.00852099	0.00454194	0.00368636	0.00376871
0.6	0.0087897	0.00612626	0.00351295	0.00855475	0.00446046	0.003643	0.00369498
0.61	0.00881253	0.00604989	0.0034754	0.00857581	0.00437963	0.00360793	0.00361193
0.62	0.00885194	0.00598043	0.00345294	0.00859813	0.00430562	0.00356935	0.00353697
0.63	0.00889533	0.0059086	0.00340988	0.00863143	0.00422401	0.00352812	0.00346558
0.64	0.00893309	0.00583736	0.00338508	0.00866248	0.00414612	0.00348822	0.00338543
0.65	0.00898108	0.00576645	0.0033659	0.00869775	0.00406824	0.00345113	0.00332771
0.66	0.00902763	0.00571359	0.00333073	0.00872977	0.00398709	0.003411	0.00326208
0.67	0.00906655	0.00565887	0.00329766	0.00876889	0.00391148	0.00338374	0.00318875
0.68	0.00912435	0.00559489	0.00326592	0.0087992	0.00383653	0.00335482	0.00312157
0.69	0.00917093	0.00553724	0.0032456	0.00883001	0.00375779	0.00332142	0.00305752
0.7	0.00921674	0.00547646	0.00321464	0.00884945	0.00368504	0.0032929	0.00298899
0.71	0.00927262	0.00541448	0.00318764	0.00887524	0.00360559	0.00327172	0.00292672
0.72	0.00932908	0.00536563	0.00315588	0.00888616	0.00353457	0.00325287	0.00286971
0.73	0.00938854	0.00531396	0.00315111	0.00889427	0.00345693	0.00323466	0.00280569
0.74	0.00944144	0.0052581	0.0031319	0.00890912	0.00338187	0.00321652	0.00273859
0.75	0.0095006	0.00520316	0.00310471	0.00892355	0.00330827	0.0031993	0.00268184
0.76	0.00955772	0.00515041	0.00308768	0.00893593	0.00323601	0.00318859	0.00263302
0.77	0.00960582	0.00509975	0.00306511	0.00895066	0.00315331	0.00317632	0.00258186
0.78	0.00964179	0.00504994	0.00302117	0.00896015	0.00308455	0.00315839	0.00253254
0.79	0.00968595	0.00499575	0.0029812	0.00895855	0.00301839	0.00314746	0.0024794
0.8	0.00974411	0.00494522	0.00295328	0.00896095	0.00295006	0.00314085	0.00243477
0.81	0.00978411	0.00489436	0.00292139	0.00895844	0.00287513	0.00313141	0.0023928
0.82	0.0098203	0.00483491	0.00288163	0.0089535	0.00279995	0.00312633	0.00235142
0.83	0.00986512	0.00478801	0.00284329	0.008938	0.00271548	0.00311908	0.0023241
0.84	0.00991109	0.00473182	0.00280387	0.00893125	0.00264114	0.00311037	0.00228314
0.85	0.00994551	0.00468738	0.002773	0.00892174	0.00256401	0.00310132	0.0022437
0.86	0.00998081	0.0046338	0.00272335	0.00890722	0.00248492	0.00309831	0.00221574
0.87	0.0100253	0.00458441	0.00268668	0.00889877	0.00241327	0.00309068	0.00218153
0.88	0.0100629	0.00453229	0.00264488	0.00888224	0.00233804	0.00307922	0.00215914
0.89	0.0101085	0.00447534	0.00260152	0.00887664	0.00226027	0.0030658	0.00213264
0.9	0.0101428	0.00441699	0.00256687	0.00885967	0.00218272	0.00305602	0.00210582
0.91	0.0101688	0.0043667	0.0025324	0.00883687	0.00210934	0.00304205	0.00208227
0.92	0.0102021	0.00430842	0.00249094	0.00881307	0.00203232	0.00302982	0.00206194
0.93	0.0102373	0.00424661	0.00244646	0.00880245	0.00195693	0.00301458	0.00204411
0.94	0.010275	0.00418573	0.00239707	0.0087693	0.00188136	0.00299794	0.00201639
0.95	0.0103071	0.00412165	0.00234816	0.00873949	0.00179936	0.00298295	0.00198892
0.96	0.010342	0.00405936	0.00229913	0.00871361	0.00171719	0.00296698	0.00196619
0.97	0.0103817	0.00399076	0.00225261	0.00869129	0.00163787	0.00295296	0.00193784
0.98	0.010423	0.00391744	0.00220446	0.00866514	0.00155646	0.00294603	0.00190292
0.99	0.0104605	0.00383548	0.00216672	0.00863343	0.00147831	0.00293382	0.00187021

## Sheet: DN PLCG
	cell#1	cell#2	cell#3	cell#4	cell#5	cell#6	cell#7	cell#8
0.01	0.00123818	0.00158893	0.00170464	0.00174447	0.00190791	0.00165	0.00149775	0.00099763
0.02	0.0024477	0.00314756	0.00340272	0.00343172	0.00385866	0.00330573	0.0029508	0.00200501
0.03	0.00363646	0.00466123	0.00505952	0.00508874	0.00576145	0.00498056	0.0043768	0.00297331
0.04	0.00482281	0.00617445	0.00666612	0.00668702	0.00756989	0.00654497	0.0057811	0.00392941
0.05	0.00596549	0.00760593	0.00819921	0.00819665	0.00927944	0.00805689	0.00713199	0.00486173
0.06	0.0070484	0.00895952	0.00965309	0.00959558	0.0109232	0.0095106	0.00841785	0.00575482
0.07	0.00808524	0.0102335	0.0110439	0.0108984	0.0125058	0.010869	0.00962966	0.00658678
0.08	0.00905858	0.0114416	0.0123337	0.0121188	0.0139629	0.012132	0.0107952	0.00736947
0.09	0.00997593	0.0125428	0.0135501	0.0132288	0.0153317	0.013325	0.011869	0.00811649
0.1	0.0108289	0.0135629	0.0146696	0.0142422	0.0165943	0.0144385	0.0128719	0.00878906
0.11	0.0115975	0.0144941	0.0156964	0.0151538	0.0177279	0.0154418	0.0137734	0.00942969
0.12	0.0123241	0.0153375	0.0166304	0.0159496	0.0187756	0.016354	0.014595	0.0100097
0.13	0.0129816	0.0160946	0.0174704	0.0166485	0.0196994	0.0171746	0.0153289	0.0105295
0.14	0.0135699	0.0167706	0.0182259	0.0172434	0.0205238	0.0179083	0.0159954	0.0110017
0.15	0.0140924	0.0173733	0.0188773	0.0177439	0.0212477	0.0185217	0.0165805	0.0114128
0.16	0.014555	0.0178988	0.0194646	0.0181574	0.0218932	0.0190722	0.0170821	0.0117778
0.17	0.014967	0.0183498	0.0199811	0.0185016	0.0224654	0.0195305	0.017518	0.0120864
0.18	0.0153115	0.0187366	0.0204255	0.0187659	0.0229729	0.0199023	0.0178853	0.0123518
0.19	0.0155987	0.0190445	0.0208012	0.0189563	0.0233945	0.0202042	0.0181758	0.0125797
0.2	0.0158395	0.0193091	0.0211032	0.0190864	0.0237447	0.0204468	0.0184147	0.012766
0.21	0.0160302	0.0195079	0.0213572	0.0191539	0.0240484	0.0206021	0.0185976	0.0129107
0.22	0.0161904	0.0196711	0.0215537	0.0191745	0.0242741	0.0206971	0.0187347	0.0130155
0.23	0.0162975	0.0197701	0.0217029	0.0191366	0.0244662	0.020745	0.0188214	0.0130809
0.24	0.0163727	0.0198262	0.0218064	0.0190692	0.0245919	0.0207348	0.0188659	0.0131232
0.25	0.0164095	0.0198483	0.0218622	0.0189574	0.0246807	0.0206759	0.0188672	0.0131389
0.26	0.0164033	0.0198246	0.0218912	0.0188215	0.0247171	0.0205685	0.01884	0.0131251
0.27	0.0163812	0.0197747	0.0218778	0.0186447	0.0247227	0.0204401	0.0187799	0.0130899
0.28	0.0163282	0.0197044	0.0218334	0.0184461	0.0247177	0.0202816	0.0186791	0.0130376
0.29	0.0162523	0.0196044	0.0217681	0.0182344	0.0246803	0.0200992	0.018568	0.0129681
0.3	0.0161582	0.0194751	0.0216853	0.0180149	0.0246047	0.0198834	0.0184331	0.0128819
0.31	0.0160469	0.0193424	0.0215771	0.0177615	0.0245288	0.0196397	0.0182771	0.0127773
0.32	0.0159192	0.0191924	0.0214551	0.0175102	0.0244317	0.0193825	0.0181106	0.0126632
0.33	0.0157757	0.0190265	0.0213159	0.0172589	0.0243309	0.0191157	0.0179273	0.0125348
0.34	0.0156172	0.018849	0.0211691	0.0169906	0.0242136	0.0188384	0.0177365	0.0124068
0.35	0.0154571	0.0186664	0.0210115	0.0167168	0.0240857	0.0185551	0.0175403	0.0122668
0.36	0.0152869	0.0184783	0.0208315	0.0164505	0.0239544	0.0182805	0.0173437	0.0121223
0.37	0.0151157	0.0182942	0.0206474	0.0161826	0.0238059	0.0179967	0.0171399	0.0119767
0.38	0.0149363	0.0181026	0.0204666	0.0159185	0.0236777	0.0177022	0.0169298	0.0118249
0.39	0.0147628	0.0179133	0.0202826	0.0156595	0.0235296	0.0174175	0.0167238	0.011675
0.4	0.0145823	0.0177332	0.0200963	0.0153955	0.0233821	0.0171331	0.0165196	0.0115228
0.41	0.0143979	0.0175542	0.0199111	0.0151448	0.0232376	0.0168534	0.0163212	0.0113701
0.42	0.0142286	0.0173845	0.0197237	0.0149033	0.0230986	0.0165687	0.0161271	0.0112205
0.43	0.0140589	0.0172138	0.0195438	0.014667	0.0229469	0.016299	0.0159395	0.0110728
0.44	0.0139043	0.0170494	0.0193615	0.014448	0.0227956	0.0160349	0.0157575	0.0109298
0.45	0.0137479	0.0169047	0.0191833	0.0142343	0.0226566	0.0157881	0.0155902	0.0107876
0.46	0.0135916	0.0167522	0.0190115	0.0140257	0.0225102	0.0155395	0.0154305	0.0106543
0.47	0.0134354	0.0166094	0.0188406	0.0138297	0.0223781	0.0153021	0.0152803	0.0105215
0.48	0.0132867	0.0164731	0.0186741	0.0136383	0.0222375	0.0150719	0.015137	0.0103856
0.49	0.0131421	0.016354	0.0185124	0.0134576	0.0220967	0.0148591	0.0149979	0.0102567
0.5	0.0129973	0.0162471	0.0183564	0.0132852	0.0219673	0.0146537	0.0148715	0.0101316
0.51	0.0128693	0.0161436	0.0182016	0.0131201	0.0218436	0.0144621	0.0147586	0.0100056
0.52	0.0127433	0.0160497	0.0180549	0.012966	0.0217295	0.0142829	0.0146559	0.00988668
0.53	0.0126182	0.0159688	0.0179129	0.0128132	0.0216091	0.0141117	0.014562	0.00977318
0.54	0.0125001	0.0158916	0.017773	0.0126723	0.0214915	0.0139414	0.0144774	0.00966132
0.55	0.0123927	0.0158205	0.0176405	0.0125359	0.0213748	0.0137955	0.0144034	0.0095509
0.56	0.012282	0.01575	0.0175092	0.0124073	0.021252	0.0136557	0.0143342	0.00945438
0.57	0.0121796	0.0156925	0.0173826	0.0122905	0.0211444	0.0135206	0.014272	0.00934938
0.58	0.012084	0.0156424	0.0172481	0.0121749	0.0210271	0.0133911	0.0142164	0.00925555
0.59	0.0119909	0.0155972	0.0171264	0.01206	0.020919	0.013267	0.0141665	0.00915975
0.6	0.0119053	0.01556	0.0170097	0.0119548	0.0208053	0.0131494	0.0141197	0.00906369
0.61	0.0118292	0.015523	0.0168931	0.0118471	0.0206901	0.0130426	0.0140723	0.00897498
0.62	0.0117499	0.015482	0.016783	0.0117508	0.0205699	0.0129461	0.0140364	0.00889089
0.63	0.0116732	0.0154487	0.0166747	0.0116518	0.0204538	0.0128518	0.0139926	0.00879874
0.64	0.0115975	0.0154269	0.016573	0.0115576	0.0203353	0.0127715	0.0139519	0.00870566
0.65	0.0115283	0.015401	0.0164731	0.0114627	0.0202122	0.0126904	0.013905	0.00862024
0.66	0.0114634	0.0153713	0.0163691	0.0113609	0.0200848	0.0126104	0.0138635	0.00853474
0.67	0.011398	0.0153444	0.0162679	0.0112618	0.0199608	0.0125352	0.0138194	0.00845568
0.68	0.0113358	0.0153171	0.0161706	0.0111565	0.0198354	0.0124713	0.0137765	0.00837358
0.69	0.0112835	0.0152935	0.0160745	0.0110519	0.0197008	0.0124128	0.0137331	0.00829555
0.7	0.0112289	0.0152662	0.0159781	0.0109396	0.0195699	0.012357	0.013684	0.00821583
0.71	0.0111796	0.0152411	0.015885	0.0108286	0.019422	0.0122999	0.0136344	0.00813912
0.72	0.011128	0.0152167	0.0157942	0.0107182	0.019274	0.0122511	0.0135828	0.00806302
0.73	0.0110737	0.015187	0.0157023	0.0105967	0.0191195	0.0122036	0.0135308	0.00799038
0.74	0.0110346	0.0151572	0.0156079	0.0104727	0.0189724	0.0121578	0.0134755	0.00792001
0.75	0.0109904	0.0151234	0.0155165	0.0103406	0.0188088	0.0121069	0.0134196	0.00785007
0.76	0.0109546	0.0150915	0.0154236	0.0102065	0.0186394	0.0120607	0.0133623	0.00777985
0.77	0.010914	0.0150559	0.0153278	0.0100718	0.0184754	0.0120106	0.0133058	0.00771086
0.78	0.0108793	0.015018	0.0152346	0.00993019	0.0183096	0.0119704	0.0132431	0.00764558
0.79	0.0108475	0.0149753	0.0151433	0.00978326	0.0181344	0.0119296	0.0131787	0.0075828
0.8	0.0108165	0.0149343	0.0150434	0.00964124	0.0179616	0.0118801	0.0131111	0.00751911
0.81	0.0107885	0.0148898	0.014952	0.00949041	0.0177786	0.0118268	0.0130406	0.00745505
0.82	0.0107593	0.0148423	0.0148571	0.00933928	0.0175889	0.0117735	0.0129739	0.00739016
0.83	0.0107295	0.0147889	0.0147589	0.00918231	0.0174022	0.0117117	0.0129072	0.00732763
0.84	0.0106973	0.0147351	0.0146603	0.0090275	0.0172122	0.0116486	0.01284	0.0072636
0.85	0.0106646	0.0146775	0.0145657	0.00887407	0.0170245	0.0115858	0.0127712	0.00720299
0.86	0.0106288	0.0146168	0.0144661	0.0087238	0.0168211	0.0115281	0.0127007	0.00714263
0.87	0.010587	0.0145498	0.0143692	0.00857087	0.0166206	0.0114652	0.0126345	0.00708279
0.88	0.0105459	0.0144825	0.0142701	0.00841128	0.0164146	0.0113978	0.0125675	0.00702281
0.89	0.0105064	0.0144094	0.014168	0.00825915	0.016204	0.0113295	0.0125004	0.00695993
0.9	0.0104631	0.0143315	0.0140684	0.00810247	0.0160003	0.0112584	0.0124324	0.0068968
0.91	0.0104202	0.0142536	0.0139645	0.00794753	0.0157768	0.0111781	0.0123617	0.00683771
0.92	0.0103743	0.0141724	0.0138619	0.00778738	0.0155624	0.0111013	0.0122945	0.00677523
0.93	0.0103277	0.0140871	0.0137604	0.00762587	0.0153441	0.0110171	0.0122261	0.00671318
0.94	0.01028	0.0140011	0.0136575	0.007464	0.0151176	0.0109257	0.0121614	0.0066504
0.95	0.0102268	0.0139126	0.0135547	0.00730498	0.0148901	0.0108362	0.0120979	0.00658823
0.96	0.0101721	0.0138221	0.0134508	0.0071481	0.0146695	0.010742	0.0120289	0.00652557
0.97	0.0101117	0.0137278	0.0133483	0.00698228	0.014436	0.0106446	0.0119607	0.00646577
0.98	0.0100533	0.0136319	0.0132462	0.00681455	0.0142089	0.0105454	0.0118922	0.00640235
0.99	0.00999039	0.0135343	0.0131394	0.00664968	0.0139753	0.0104342	0.0118249	0.00633928

## Sheet: wort.
	cell#1	cell#2	cell#3	cell#4	cell#5	cell#6	cell#7
0.01	0.000584866	0.000374447	0.000901634	0.000762149	0.000650183	0.000871751	0.00066461
0.02	0.0011786	0.000708379	0.00201282	0.00159719	0.0012997	0.00191294	0.00140743
0.03	0.00170792	0.000956871	0.00308182	0.00237094	0.00190569	0.00290833	0.00218566
0.04	0.00216311	0.00132729	0.00395905	0.00312538	0.00250265	0.00390305	0.00288809
0.05	0.00272958	0.00168015	0.00481271	0.00388204	0.00303461	0.00481388	0.00359513
0.06	0.00323516	0.00198863	0.00550128	0.00453455	0.00351872	0.00570358	0.00429977
0.07	0.00372991	0.00229576	0.00631282	0.00515723	0.00397799	0.00650969	0.00492224
0.08	0.00411066	0.0025949	0.00695377	0.00571029	0.00440102	0.00720853	0.00552864
0.09	0.00460852	0.00283205	0.00749295	0.00625778	0.00488289	0.00792933	0.0061454
0.1	0.0050574	0.00306036	0.00811996	0.00674913	0.00523239	0.00858496	0.00667556
0.11	0.00537541	0.00327361	0.00867751	0.0072068	0.00561325	0.00912674	0.00717618
0.12	0.00564581	0.00344455	0.00907013	0.007566	0.00593475	0.00969181	0.00765779
0.13	0.00593105	0.00354904	0.00955701	0.00790924	0.0062094	0.0101495	0.00811541
0.14	0.00614153	0.00371285	0.00991272	0.00816058	0.00645329	0.0105563	0.00856994
0.15	0.0063413	0.0038489	0.0102491	0.00839538	0.0066756	0.0109145	0.00893209
0.16	0.00654344	0.00396402	0.0104507	0.00866709	0.00683273	0.0112563	0.00925934
0.17	0.0067226	0.00407587	0.0106316	0.00889266	0.00700011	0.0115366	0.00956839
0.18	0.00691689	0.00413368	0.0108259	0.00910902	0.00716463	0.0117768	0.00983758
0.19	0.0070168	0.0042131	0.0110364	0.00930692	0.00730736	0.0119377	0.010085
0.2	0.00710657	0.00427101	0.0111726	0.00943921	0.00738133	0.0120849	0.0103529
0.21	0.00724739	0.00433455	0.0113181	0.00955469	0.00748709	0.0121689	0.010549
0.22	0.00727908	0.00436912	0.0114256	0.00963147	0.00754051	0.0122565	0.0107124
0.23	0.00736755	0.00439467	0.0115153	0.00972873	0.0075579	0.0122849	0.0108607
0.24	0.00745442	0.0044466	0.0116054	0.0098204	0.00754961	0.0122462	0.0109478
0.25	0.00755009	0.00447942	0.0116211	0.00984672	0.00752202	0.012231	0.0110331
0.26	0.00763127	0.0044876	0.0115994	0.00987966	0.00751637	0.0121604	0.0111015
0.27	0.00769547	0.00449263	0.0115247	0.0098697	0.00749304	0.0120867	0.0111444
0.28	0.00774642	0.0045191	0.0114488	0.00991413	0.00746365	0.0120183	0.0111993
0.29	0.00782203	0.00451163	0.0113459	0.00990947	0.00743093	0.0119156	0.0112248
0.3	0.00790136	0.00448615	0.0112854	0.00990142	0.00736274	0.0118559	0.0112601
0.31	0.00795306	0.0044403	0.011233	0.00987502	0.00728779	0.0117486	0.0112674
0.32	0.00797369	0.00442076	0.0112048	0.00984022	0.00721867	0.0116154	0.01129
0.33	0.00800631	0.0044262	0.0112252	0.0098012	0.00715075	0.0115183	0.0112905
0.34	0.00802719	0.00439062	0.0111919	0.00977407	0.00708323	0.0114465	0.0112864
0.35	0.00807239	0.00437228	0.0111483	0.00974823	0.00701083	0.0113883	0.0112841
0.36	0.00804365	0.00432985	0.0111011	0.00972113	0.00693407	0.0113048	0.0112732
0.37	0.00801397	0.00429189	0.0110364	0.00970486	0.00685794	0.0112097	0.0112206
0.38	0.0079773	0.00428199	0.010997	0.00964354	0.0067773	0.011105	0.0111882
0.39	0.00793126	0.00425423	0.0109612	0.0096209	0.00666109	0.0109993	0.011124
0.4	0.00790353	0.00423029	0.0109287	0.00957151	0.00659687	0.0109069	0.0110843
0.41	0.00783246	0.00422019	0.010901	0.00955094	0.00652898	0.0108249	0.0110593
0.42	0.00776397	0.00419601	0.0108612	0.00952256	0.00647602	0.0107693	0.0110338
0.43	0.00774103	0.00416099	0.0107877	0.0095187	0.0064396	0.0106763	0.0110506
0.44	0.00770251	0.00416816	0.0106999	0.0095105	0.00635651	0.0106052	0.01101
0.45	0.00769087	0.00417098	0.0106297	0.00949955	0.00631427	0.0105328	0.0109641
0.46	0.00767273	0.00414381	0.01057	0.00947049	0.00625446	0.0105088	0.0109334
0.47	0.00758606	0.00417845	0.0104475	0.00945639	0.0062046	0.0104757	0.0108981
0.48	0.00749882	0.00419624	0.0103299	0.00945868	0.00614361	0.0104732	0.0108607
0.49	0.00743419	0.00422438	0.0102458	0.00948179	0.00609482	0.0104569	0.0108358
0.5	0.00738053	0.00426058	0.0101736	0.00949053	0.00604604	0.010436	0.0107999
0.51	0.00733714	0.00425872	0.0101046	0.00951456	0.00600324	0.0104415	0.0107925
0.52	0.00730256	0.00428011	0.00999596	0.00954956	0.00595663	0.0104228	0.0107609
0.53	0.00730772	0.0043128	0.00993457	0.00958732	0.00590309	0.0104103	0.0107234
0.54	0.00730447	0.00435776	0.00985146	0.00961412	0.00584658	0.0104344	0.0106847
0.55	0.0072437	0.00438995	0.00975476	0.00966123	0.00580002	0.0104315	0.0106488
0.56	0.00723767	0.00444597	0.00968437	0.00968597	0.00574999	0.0104568	0.0106468
0.57	0.007194	0.00448536	0.00961522	0.00976034	0.00572727	0.0104736	0.0106458
0.58	0.00718389	0.00455266	0.00954269	0.00979528	0.00571321	0.0105039	0.0106614
0.59	0.00717384	0.00459841	0.00948622	0.00984325	0.00569793	0.010534	0.010683
0.6	0.00718701	0.00464035	0.00943163	0.00989997	0.00568537	0.0105743	0.0106829
0.61	0.00718764	0.00469396	0.00935865	0.00995558	0.00567307	0.0105952	0.0106856
0.62	0.00718893	0.0047454	0.00930525	0.0100081	0.00565418	0.010624	0.0107131
0.63	0.00718476	0.00477557	0.00926927	0.0100628	0.00563082	0.0106312	0.0107183
0.64	0.00720817	0.00480201	0.0092322	0.0101293	0.00561155	0.0106319	0.010718
0.65	0.00723164	0.00482068	0.00916972	0.0101924	0.00558028	0.0106449	0.0107096
0.66	0.00720509	0.00482555	0.00912475	0.010246	0.00555587	0.010707	0.0107184
0.67	0.00721196	0.00482879	0.0090427	0.0102878	0.00552603	0.0107468	0.0107106
0.68	0.00720849	0.00481654	0.00899382	0.0103156	0.00551221	0.0107749	0.0107218
0.69	0.00720413	0.0047914	0.00894572	0.0103779	0.00551319	0.0108254	0.0107055
0.7	0.00718253	0.00480392	0.00892268	0.0104244	0.00549367	0.0108716	0.0106976
0.71	0.0071626	0.00480531	0.00890912	0.0104556	0.0055141	0.0109326	0.0106964
0.72	0.0071556	0.00483277	0.00886076	0.0104826	0.005511	0.0109764	0.0106954
0.73	0.00713485	0.00482606	0.00883907	0.0105155	0.00552526	0.0110181	0.0106789
0.74	0.00712105	0.00482852	0.00881655	0.0105542	0.00554919	0.0110523	0.0106669
0.75	0.00709805	0.0048388	0.00880495	0.0105984	0.00557357	0.0110903	0.0106324
0.76	0.00710443	0.00484494	0.00880209	0.0106489	0.0056079	0.0111275	0.0105866
0.77	0.00709931	0.00488115	0.00876389	0.0106564	0.00564364	0.0111713	0.0105463
0.78	0.00711758	0.00489083	0.0087739	0.0106867	0.0056652	0.0111956	0.0104964
0.79	0.00711645	0.00492646	0.00878966	0.0106863	0.00570624	0.011243	0.010442
0.8	0.00713542	0.0049671	0.00879132	0.0106997	0.00573457	0.0112997	0.0103706
0.81	0.00713261	0.00498886	0.00880783	0.0107105	0.00575126	0.0113563	0.0103161
0.82	0.00712204	0.00502417	0.00877338	0.0107051	0.00577609	0.0113972	0.0102484
0.83	0.00709691	0.00507626	0.00873228	0.0107198	0.00579815	0.0114472	0.0101695
0.84	0.00706795	0.00509271	0.00868841	0.0107376	0.00581693	0.0114976	0.0100644
0.85	0.00706597	0.00513785	0.00863262	0.0107323	0.00581333	0.0115484	0.00996785
0.86	0.00706228	0.00517502	0.00854144	0.0107237	0.00581762	0.0115763	0.00987254
0.87	0.00709149	0.00521256	0.00849832	0.0107171	0.00584034	0.0116222	0.00977453
0.88	0.00708263	0.00522949	0.00844271	0.0107068	0.00582925	0.0116433	0.00965633
0.89	0.0070775	0.00524033	0.00834657	0.0106942	0.00582287	0.0116884	0.0095411
0.9	0.0070625	0.00527737	0.00829824	0.0106736	0.00582414	0.0117303	0.00942493
0.91	0.00701505	0.00529598	0.00820066	0.010662	0.00579647	0.0117867	0.00930763
0.92	0.00696919	0.00533215	0.00812091	0.0106486	0.0057876	0.0118199	0.00919138
0.93	0.00691989	0.00536172	0.00805471	0.0106299	0.005763	0.0118628	0.00907211
0.94	0.00688403	0.0053906	0.0079639	0.0106178	0.00575402	0.0118929	0.00894968
0.95	0.00682201	0.00540976	0.00786684	0.0106112	0.00574408	0.0119369	0.0088387
0.96	0.00677722	0.00541942	0.00782671	0.0105934	0.00573741	0.0119984	0.00872396
0.97	0.0067543	0.00541115	0.00776983	0.010584	0.00572746	0.0120476	0.00859867
0.98	0.00670193	0.00540374	0.00772943	0.0105826	0.00570368	0.0120879	0.00847212
0.99	0.00666469	0.00538968	0.00763738	0.0105753	0.00569694	0.0121381	0.00834659
