# Supplementary material for: Bilateral regulation of EGFR activity and local PI(4,5)P2 dynamics in mammalian cells observed with superresolution microscopy
Source: eLife journal article supplement (doi:10.7554/elife.101652), 2024-10-09
Supplement: fig6-data1 [file Figure 6C.xlsx]

## Sheet: control
	cell#1	cell#2	cell#3	cell#4	cell#5	cell#6	cell#7
0.01	0.0006553	0.000514189	0.000400752	0.00041447	0.000312112	0.000540546	0.000354667
0.02	0.00115505	0.0011397	0.000790049	0.000904667	0.00068681	0.00104171	0.000780167
0.03	0.00173435	0.00176157	0.00122244	0.0012788	0.00106951	0.00153112	0.00119809
0.04	0.00227725	0.0023071	0.00170407	0.00171383	0.00141454	0.00200629	0.0015957
0.05	0.0027705	0.00286592	0.00211653	0.0021446	0.00176365	0.00247519	0.00198921
0.06	0.00332549	0.00346429	0.00256738	0.00259219	0.00211204	0.00290123	0.00238623
0.07	0.00385628	0.00396512	0.00294317	0.00298303	0.0024453	0.00332887	0.00272269
0.08	0.00436205	0.00445858	0.00335035	0.00339123	0.00276958	0.00371088	0.00307815
0.09	0.00487386	0.00491563	0.0037328	0.0037454	0.00310162	0.0040801	0.00341484
0.1	0.0053501	0.00536711	0.00406579	0.00407301	0.00345206	0.00441692	0.00374454
0.11	0.00581106	0.00576791	0.00440727	0.00442433	0.00372008	0.00473501	0.00405453
0.12	0.00623039	0.00617098	0.00474647	0.00477093	0.00398697	0.00500393	0.00430855
0.13	0.00664554	0.00652586	0.00506621	0.00509638	0.00425661	0.0052438	0.00460142
0.14	0.00701861	0.00687082	0.00535531	0.00536953	0.0044801	0.00548391	0.00482956
0.15	0.00741414	0.00719959	0.00565153	0.00565262	0.00469552	0.00568664	0.00507182
0.16	0.00774746	0.00747877	0.00591807	0.00591155	0.00489707	0.0058707	0.00529714
0.17	0.00806974	0.00772574	0.00617716	0.0061471	0.00509646	0.00602279	0.00548568
0.18	0.0083486	0.00794969	0.00640518	0.00638152	0.00527257	0.00615345	0.00567888
0.19	0.00861222	0.0081552	0.00661743	0.00657327	0.00539794	0.00626211	0.00580533
0.2	0.00884705	0.00834721	0.00681558	0.00678353	0.00553425	0.00636401	0.00593158
0.21	0.00905757	0.0084931	0.00701933	0.00698958	0.00564789	0.00644507	0.00606376
0.22	0.009217	0.00867301	0.00719459	0.00716361	0.00575145	0.00650709	0.00617263
0.23	0.00938772	0.00877872	0.00735013	0.00732545	0.00585868	0.00655254	0.00627796
0.24	0.00951577	0.00888322	0.00752645	0.00748118	0.0059253	0.00658976	0.00635945
0.25	0.00960626	0.00895643	0.00766744	0.00760099	0.00600026	0.00660943	0.00645873
0.26	0.00969585	0.00902832	0.00777513	0.00770312	0.00604557	0.006618	0.00653837
0.27	0.00977483	0.00907238	0.00790968	0.00782624	0.00610884	0.00659862	0.00658698
0.28	0.00983321	0.00911836	0.00804085	0.00793407	0.00614078	0.00657895	0.0066331
0.29	0.00987282	0.0091457	0.00813832	0.00801539	0.00617619	0.00654917	0.00664842
0.3	0.00988863	0.00915923	0.00823561	0.00809851	0.00618312	0.00650777	0.00668697
0.31	0.00991189	0.00916917	0.00831759	0.00817702	0.00616994	0.00645843	0.00667887
0.32	0.00991366	0.0091851	0.00837834	0.00825926	0.00615829	0.00640184	0.00666466
0.33	0.0099281	0.00918851	0.00844863	0.00833826	0.0061585	0.00633434	0.00666574
0.34	0.00991724	0.00916979	0.00851085	0.00839961	0.00612041	0.00627129	0.00665124
0.35	0.00991369	0.00914078	0.0085565	0.00845963	0.00607983	0.00618844	0.00662555
0.36	0.00988507	0.00911831	0.0086248	0.00852223	0.00602793	0.00610131	0.00660043
0.37	0.00984902	0.00908173	0.0086662	0.00857486	0.00599233	0.00602255	0.0065529
0.38	0.0098195	0.00904052	0.00871692	0.00863669	0.00593487	0.00592587	0.00653128
0.39	0.0097557	0.00900082	0.00875671	0.00867593	0.00588243	0.0058383	0.0065227
0.4	0.00969958	0.00894386	0.00878732	0.00871937	0.00582524	0.00575444	0.0064855
0.41	0.00962901	0.00890538	0.00883697	0.00877345	0.00575985	0.00566199	0.0064474
0.42	0.00957986	0.00885593	0.00887386	0.00881563	0.00569219	0.00557183	0.00641431
0.43	0.00949251	0.00879725	0.00888556	0.00886604	0.00562531	0.0054856	0.0063606
0.44	0.00941881	0.00874091	0.00892163	0.00890359	0.00554213	0.0053888	0.00628765
0.45	0.0093451	0.00868221	0.00895535	0.0089408	0.00547749	0.00530138	0.00625024
0.46	0.00924893	0.00862449	0.00898563	0.00898355	0.00540263	0.00520737	0.00620401
0.47	0.00917186	0.00856935	0.00900849	0.0089955	0.00531435	0.00511639	0.00615269
0.48	0.00909331	0.00851084	0.00904216	0.00901389	0.00523769	0.00502254	0.00609592
0.49	0.00900277	0.00846329	0.00905232	0.00903247	0.00516882	0.00493512	0.00607001
0.5	0.0089327	0.00841825	0.00907371	0.00905771	0.00508874	0.00483995	0.00603794
0.51	0.00884994	0.0083712	0.0091084	0.00907583	0.00500903	0.00475577	0.00598464
0.52	0.0087714	0.00833574	0.00913692	0.00909075	0.00493659	0.00466835	0.00593796
0.53	0.00869637	0.00828402	0.00915194	0.00909318	0.00486734	0.00458013	0.00590146
0.54	0.00862443	0.0082388	0.00918208	0.00911366	0.00480841	0.0044981	0.00584815
0.55	0.00852818	0.00821161	0.00920231	0.00912958	0.00473313	0.00441661	0.0058085
0.56	0.00844032	0.0081745	0.00921974	0.00915683	0.00466567	0.00433977	0.00577088
0.57	0.00836086	0.00813096	0.00923421	0.00917844	0.00459597	0.00425561	0.00574134
0.58	0.0082915	0.00810472	0.00925145	0.00919367	0.00455355	0.00417789	0.00568097
0.59	0.00820553	0.00809223	0.00927244	0.00921341	0.00450046	0.00410292	0.00564155
0.6	0.00813054	0.00805944	0.00928682	0.00923813	0.00443129	0.00403176	0.00559335
0.61	0.0080463	0.00805369	0.00929395	0.00925764	0.00438158	0.00396282	0.00552605
0.62	0.00797203	0.00801587	0.00930031	0.00929845	0.00432982	0.00390479	0.00546701
0.63	0.00788898	0.00798263	0.00929687	0.00932046	0.0042867	0.0038387	0.00540665
0.64	0.00780877	0.00796367	0.00930571	0.00934739	0.00422768	0.00377283	0.00536073
0.65	0.00773129	0.00794431	0.00932128	0.00936694	0.0041861	0.00372311	0.00530029
0.66	0.00765476	0.0079364	0.00932707	0.00939608	0.00414305	0.00366875	0.00525647
0.67	0.00759487	0.00792482	0.00933714	0.00941012	0.00411312	0.00361987	0.005202
0.68	0.00750616	0.0079014	0.00934856	0.0094304	0.0040813	0.0035815	0.00513932
0.69	0.00743582	0.00789283	0.00935782	0.00943826	0.00403007	0.00354333	0.00510903
0.7	0.00735429	0.00789548	0.00935301	0.00945501	0.00399178	0.00351542	0.0050738
0.71	0.00728407	0.00788913	0.0093591	0.00947633	0.00396034	0.00347941	0.00503648
0.72	0.0072063	0.00789038	0.00937623	0.00949601	0.0039278	0.00345263	0.00502408
0.73	0.00711471	0.00788874	0.0093825	0.00951679	0.00389667	0.00342657	0.0049967
0.74	0.00702742	0.00788971	0.0094053	0.00954072	0.00386764	0.00340316	0.00497044
0.75	0.00692702	0.00787913	0.0094137	0.0095646	0.00384181	0.00338587	0.00493776
0.76	0.0068216	0.007869	0.0094325	0.00959555	0.00382052	0.00336356	0.00491912
0.77	0.00671876	0.00785755	0.00943697	0.00960635	0.00378842	0.00334788	0.00489702
0.78	0.00660554	0.00784711	0.0094511	0.00963216	0.00376209	0.00333618	0.00488566
0.79	0.00650957	0.00784301	0.00945173	0.00965517	0.00373139	0.00332313	0.00485991
0.8	0.00640357	0.00784136	0.00945406	0.00969152	0.00372471	0.00331551	0.00484186
0.81	0.00629164	0.00784404	0.00945047	0.00971837	0.00369927	0.00330641	0.00483653
0.82	0.00616059	0.00783628	0.00943503	0.00975035	0.00368461	0.00330149	0.00482515
0.83	0.00603701	0.00784381	0.00942464	0.00977794	0.00367258	0.00329901	0.00481036
0.84	0.0059094	0.00783986	0.00942644	0.00981177	0.00365634	0.00329456	0.00479357
0.85	0.00575265	0.0078173	0.00940269	0.00983909	0.003662	0.00328881	0.00477449
0.86	0.00561149	0.00781011	0.00939438	0.00985918	0.00366039	0.003285	0.00473386
0.87	0.00545512	0.0078038	0.00937691	0.00987884	0.00365508	0.0032886	0.00472078
0.88	0.00531149	0.00780958	0.00938185	0.00989652	0.00365817	0.00328703	0.00469867
0.89	0.00514693	0.00781243	0.00936861	0.00991471	0.00365217	0.00329149	0.00467426
0.9	0.00499716	0.00780702	0.00936127	0.00993222	0.0036388	0.00329583	0.00463636
0.91	0.00484681	0.00781035	0.00934876	0.0099566	0.00364629	0.00329855	0.00461041
0.92	0.00468737	0.00782336	0.00932099	0.00997246	0.00364393	0.00330921	0.00459927
0.93	0.00450497	0.00783202	0.00929854	0.0099944	0.00363361	0.00332067	0.0045821
0.94	0.00432844	0.00783573	0.00926837	0.0100171	0.00363673	0.00333416	0.00456675
0.95	0.00413755	0.00785225	0.00923135	0.0100414	0.00364165	0.00334612	0.00457232
0.96	0.00395094	0.00787025	0.00920449	0.0100627	0.00365706	0.00336211	0.00457977
0.97	0.00376887	0.00787062	0.00916688	0.0100791	0.00366325	0.003381	0.00456923
0.98	0.00357512	0.0078762	0.00913719	0.010112	0.00367644	0.00339749	0.00456435
0.99	0.00337618	0.00787148	0.00911379	0.0101345	0.00368583	0.00341656	0.00455507

## Sheet: DN PLCG
	cell#1	cell#2	cell#3	cell#4	cell#5	cell#6	cell#7	cell#8
0.01	0.00120766	0.0013475	0.00130632	0.0020167	0.00149272	0.000955909	0.00143529	0.00103031
0.02	0.00242284	0.00269819	0.0028954	0.00398801	0.00318503	0.00208276	0.00305701	0.00197486
0.03	0.00363747	0.00403463	0.00432817	0.0058944	0.00485339	0.00322669	0.0045489	0.00293202
0.04	0.00483001	0.00536456	0.00580959	0.0077582	0.00650524	0.00439987	0.00597763	0.00388112
0.05	0.00594966	0.00668885	0.007147	0.00959281	0.00803605	0.0053732	0.00739613	0.00485627
0.06	0.00705129	0.00794131	0.00846354	0.0113011	0.00946357	0.00638825	0.00874202	0.00574943
0.07	0.00811235	0.00911202	0.00975857	0.012961	0.0109549	0.00739273	0.0100249	0.00663981
0.08	0.00912055	0.0102457	0.0109618	0.0145703	0.012464	0.00841228	0.0112333	0.0074628
0.09	0.0100712	0.0113464	0.0121019	0.0160171	0.0139228	0.00941895	0.0123555	0.00824828
0.1	0.0109498	0.012347	0.013172	0.0173646	0.0151458	0.0102775	0.0134687	0.00899493
0.11	0.0117763	0.0133169	0.0142161	0.0186688	0.016397	0.0111349	0.0144606	0.0096955
0.12	0.0125655	0.0142033	0.0151819	0.0198675	0.0175912	0.0119256	0.0153924	0.0103434
0.13	0.0133066	0.0150708	0.0160287	0.0209977	0.0187491	0.0126111	0.0163	0.0109518
0.14	0.0140118	0.015847	0.0168564	0.022012	0.0198612	0.0132712	0.017087	0.0115201
0.15	0.0146282	0.016572	0.0176152	0.0229044	0.0208881	0.0139377	0.0178486	0.0120567
0.16	0.0151839	0.0172608	0.0183352	0.0237414	0.0217279	0.0146101	0.0185585	0.0125299
0.17	0.0157084	0.0178714	0.0189844	0.0244742	0.0224985	0.0151742	0.0191997	0.0129842
0.18	0.0162116	0.0184003	0.0195564	0.0251456	0.023256	0.0157011	0.0197689	0.013421
0.19	0.0166824	0.0189225	0.0200659	0.0257614	0.0239459	0.0161257	0.0203219	0.0138232
0.2	0.0170899	0.019358	0.0205451	0.0262856	0.0244876	0.016488	0.0208019	0.0141638
0.21	0.0174742	0.0197463	0.0209751	0.0267233	0.0249931	0.0168394	0.0212287	0.0145031
0.22	0.0177812	0.020099	0.0213507	0.0271547	0.0254238	0.0171565	0.0215977	0.0147855
0.23	0.018081	0.0204058	0.0216765	0.0275105	0.0258442	0.0174326	0.0219659	0.0150518
0.24	0.0183305	0.020676	0.0219637	0.0278165	0.0262016	0.0176181	0.0222619	0.0152837
0.25	0.0185626	0.0208851	0.0222177	0.0280724	0.0265358	0.0178353	0.0225148	0.0154895
0.26	0.018763	0.021084	0.0224431	0.0283081	0.0268007	0.018013	0.0227243	0.0156663
0.27	0.018933	0.0212434	0.0226196	0.0284743	0.0270461	0.0181581	0.0229186	0.0158166
0.28	0.0190673	0.0213807	0.0227868	0.0286297	0.0272416	0.0182994	0.0230841	0.0159504
0.29	0.0191939	0.0214685	0.022894	0.0287466	0.0273781	0.018386	0.0232003	0.01608
0.3	0.0192827	0.0215389	0.0229861	0.0288453	0.0274616	0.018432	0.0232692	0.0161766
0.31	0.0193481	0.021576	0.0230511	0.0288973	0.0275473	0.0185148	0.0233454	0.0162858
0.32	0.0194066	0.0216112	0.0231055	0.028937	0.0276003	0.0185752	0.0234009	0.0163674
0.33	0.0194369	0.0216131	0.0231217	0.0289498	0.027649	0.0186661	0.0234337	0.0164436
0.34	0.0194456	0.0216102	0.0231462	0.0289773	0.0276629	0.0187071	0.0234698	0.016513
0.35	0.0194536	0.021564	0.0231623	0.0289773	0.027659	0.0186689	0.0234655	0.0165597
0.36	0.0194426	0.0215423	0.023141	0.02895	0.0276536	0.0186261	0.0234634	0.0165937
0.37	0.0194305	0.0215037	0.0231158	0.0289071	0.0275883	0.0186081	0.0234478	0.0166027
0.38	0.0193863	0.0214685	0.0230907	0.0288618	0.0275605	0.0186199	0.0234122	0.016633
0.39	0.0193407	0.0214189	0.0230581	0.0288108	0.0275083	0.0186192	0.0233731	0.0166536
0.4	0.0192919	0.0213554	0.023013	0.0287288	0.0274336	0.018617	0.0233194	0.0166451
0.41	0.0192439	0.0212767	0.0229571	0.0286352	0.0273456	0.0185829	0.0232598	0.0166587
0.42	0.0191779	0.0211908	0.0229071	0.0285327	0.0272379	0.0185396	0.0231744	0.0166621
0.43	0.0191078	0.0211297	0.0228452	0.0284317	0.0271387	0.0184656	0.0230931	0.0166421
0.44	0.0190559	0.0210555	0.0227614	0.0283141	0.0270541	0.0184179	0.0230339	0.0166339
0.45	0.0189986	0.02098	0.0226792	0.02821	0.026966	0.0183361	0.0229593	0.0165918
0.46	0.0189301	0.0209102	0.0226067	0.0281015	0.0269376	0.018219	0.0228885	0.0165495
0.47	0.01887	0.0208247	0.0225308	0.0279736	0.026818	0.018178	0.022802	0.0165089
0.48	0.0187936	0.0207486	0.0224516	0.0278447	0.0267301	0.0181136	0.0227257	0.0164592
0.49	0.0187297	0.020666	0.0223895	0.0277148	0.0266379	0.0180351	0.0226354	0.0164013
0.5	0.018659	0.0205807	0.022332	0.0275925	0.0265439	0.0179466	0.0225521	0.0163448
0.51	0.0185902	0.020492	0.0222794	0.0274693	0.0264083	0.0178644	0.0224656	0.0162953
0.52	0.0185232	0.0203932	0.0222257	0.0273541	0.0263052	0.0178124	0.0224049	0.0162446
0.53	0.0184543	0.0203137	0.0221607	0.0272459	0.026263	0.0177496	0.0223013	0.0161942
0.54	0.0183996	0.0202436	0.0221036	0.0271262	0.0261539	0.0176735	0.0222081	0.0161389
0.55	0.0183277	0.0201476	0.0220466	0.026989	0.026089	0.0175938	0.0221204	0.0160896
0.56	0.0182653	0.020057	0.0219669	0.0268599	0.0259982	0.0175327	0.0220418	0.0160444
0.57	0.0181995	0.0199914	0.0219262	0.0267699	0.0259068	0.0174671	0.0219532	0.0159923
0.58	0.0181232	0.0198955	0.0218787	0.0266617	0.025821	0.0173606	0.0218693	0.0159331
0.59	0.0180408	0.0198112	0.0218403	0.026553	0.0257559	0.0172474	0.0217836	0.0158834
0.6	0.0179642	0.0197143	0.0218079	0.0264357	0.0256142	0.0171376	0.021703	0.0158346
0.61	0.0179147	0.019634	0.0217784	0.0263271	0.0255115	0.0170321	0.021616	0.0157945
0.62	0.0178414	0.0195425	0.0217588	0.0261857	0.025404	0.0169292	0.0215085	0.0157544
0.63	0.0177586	0.0194588	0.021721	0.0260614	0.0253033	0.0168199	0.0214068	0.0157139
0.64	0.0176886	0.0193801	0.0217101	0.0259375	0.0252261	0.0167186	0.0213212	0.0156798
0.65	0.0176086	0.0192968	0.0216945	0.0258059	0.0250868	0.0166293	0.0212134	0.0156408
0.66	0.017538	0.0192076	0.0216778	0.025678	0.0250193	0.0164986	0.0211031	0.0156115
0.67	0.0174533	0.0191293	0.021681	0.0255435	0.0249109	0.0163813	0.0210129	0.0155713
0.68	0.017375	0.0190515	0.0216832	0.0254009	0.0247806	0.0162732	0.0209074	0.0155347
0.69	0.017286	0.0189503	0.0216759	0.0252439	0.0246852	0.0161424	0.0207882	0.0154988
0.7	0.0172039	0.0188829	0.0216722	0.0250854	0.0245839	0.0160313	0.0206639	0.0154606
0.71	0.0171152	0.0187955	0.0216607	0.0249349	0.0244661	0.0159096	0.0205247	0.015415
0.72	0.0170265	0.0187124	0.0216477	0.0247812	0.0243458	0.0157669	0.0203913	0.0153689
0.73	0.0169578	0.0186397	0.0216294	0.02461	0.0242215	0.0156553	0.0202472	0.0153321
0.74	0.0168802	0.0185572	0.0216151	0.0244394	0.0240795	0.015525	0.0201256	0.0152925
0.75	0.0167969	0.0184707	0.0216049	0.0242713	0.0239853	0.0153952	0.0199776	0.0152411
0.76	0.0167235	0.0183924	0.0215879	0.0241078	0.0238582	0.0152726	0.0198471	0.0151924
0.77	0.0166395	0.0183005	0.0215521	0.0239273	0.023744	0.0151485	0.0197089	0.0151492
0.78	0.0165515	0.018205	0.0215271	0.0237506	0.0235945	0.0150248	0.0195777	0.0151008
0.79	0.0164775	0.0181034	0.0214929	0.0235698	0.0234671	0.0149	0.0194417	0.0150481
0.8	0.0163934	0.0180086	0.0214556	0.0233692	0.0233455	0.0147678	0.019307	0.0149915
0.81	0.0163049	0.0179109	0.0214108	0.0231907	0.0232202	0.0146392	0.0191604	0.0149458
0.82	0.0162152	0.0178	0.0213824	0.023005	0.0230538	0.0144832	0.0190271	0.0148919
0.83	0.0161342	0.0177045	0.0213451	0.0227956	0.0228897	0.0143497	0.0188895	0.0148336
0.84	0.0160454	0.0176178	0.0213221	0.0226014	0.0227508	0.0142112	0.0187531	0.0147749
0.85	0.0159552	0.0175215	0.0212782	0.0224161	0.0226079	0.014109	0.0186254	0.0147132
0.86	0.0158649	0.0174292	0.0212397	0.0222275	0.0224356	0.0139891	0.0185045	0.0146662
0.87	0.0157727	0.0173376	0.0212097	0.0220435	0.0222502	0.0138549	0.0183944	0.0146054
0.88	0.0156946	0.017241	0.0211542	0.0218295	0.0220698	0.0137297	0.0182907	0.014544
0.89	0.0156141	0.0171397	0.021103	0.0216146	0.0219157	0.0136082	0.018179	0.014488
0.9	0.0155328	0.017043	0.0210492	0.0214003	0.0217339	0.0134641	0.0180744	0.01444
0.91	0.015445	0.0169286	0.0209992	0.0211831	0.0215315	0.0133375	0.0179864	0.0143724
0.92	0.0153543	0.0168211	0.0209536	0.0209874	0.0213392	0.0131991	0.0178876	0.0143117
0.93	0.0152856	0.0167181	0.0209116	0.0207809	0.0211327	0.0130439	0.0177974	0.0142512
0.94	0.0152128	0.0166146	0.0208662	0.0205629	0.0209051	0.0128853	0.017708	0.0141879
0.95	0.0151417	0.0165087	0.0208277	0.0203497	0.0206793	0.0127409	0.0176106	0.0141155
0.96	0.015079	0.0164161	0.0207918	0.0201447	0.0204816	0.0126174	0.0175023	0.0140526
0.97	0.0150197	0.0163075	0.0207524	0.0199188	0.0202933	0.0124472	0.0174032	0.013991
0.98	0.0149736	0.016209	0.0207329	0.0197065	0.0201058	0.0123003	0.0172953	0.0139285
0.99	0.0149169	0.0161018	0.0207093	0.0194939	0.019875	0.0121561	0.0171927	0.0138695

## Sheet: wort.
	cell#1	cell#2	cell#3	cell#4	cell#5	cell#6	cell#7
0.01	-0.000642287	0.000299735	0.000471017	0.000380527	0.000197466	0.000397239	0.000613581
0.02	0.0005913	0.000778475	0.00108523	0.000993908	0.000859536	0.00151914	0.00155609
0.03	0.00111855	0.00116664	0.00177717	0.00149903	0.00144305	0.00225572	0.00240352
0.04	0.00184536	0.0015516	0.00251853	0.00205078	0.00196283	0.00304103	0.00309886
0.05	0.00241056	0.00196608	0.0032209	0.00255379	0.00239666	0.00365737	0.00371997
0.06	0.00285202	0.00231731	0.00387854	0.00305107	0.00278742	0.00450861	0.00448562
0.07	0.00319552	0.00265701	0.0046159	0.0034739	0.0031607	0.00515295	0.00530656
0.08	0.00371132	0.00288105	0.00522459	0.00402842	0.00353163	0.00568933	0.00591233
0.09	0.0040779	0.00321759	0.00575429	0.00438112	0.00385007	0.00624752	0.0065703
0.1	0.00441513	0.00351268	0.00638326	0.00473404	0.00428703	0.00683435	0.00715029
0.11	0.00473333	0.00379203	0.00684083	0.00516066	0.00452592	0.00734704	0.00768373
0.12	0.00517406	0.00400723	0.00745694	0.0054325	0.00479184	0.00784972	0.00824676
0.13	0.00553686	0.00422121	0.00794311	0.00579916	0.00506915	0.00817779	0.00870945
0.14	0.00584281	0.00440556	0.00844385	0.00615556	0.0052985	0.00858895	0.00914085
0.15	0.00603048	0.004617	0.00876159	0.00647848	0.00550688	0.00887024	0.00955338
0.16	0.00627369	0.00477675	0.00905828	0.00677694	0.00575984	0.00916847	0.00996491
0.17	0.0064391	0.0049448	0.00940042	0.00711918	0.00603123	0.00937822	0.0103073
0.18	0.00658761	0.0051018	0.0096992	0.00735754	0.00626345	0.00965909	0.0106675
0.19	0.00676019	0.00526107	0.00975037	0.00760771	0.00648731	0.00991481	0.0110174
0.2	0.00708863	0.00536798	0.00999663	0.00783696	0.00663582	0.0100475	0.011235
0.21	0.00746141	0.00542886	0.0102474	0.00806739	0.00681549	0.0102222	0.0114062
0.22	0.00753944	0.00556991	0.0104614	0.00822325	0.00697793	0.0103596	0.0115981
0.23	0.0077013	0.00564434	0.0107387	0.00841403	0.00711082	0.0104949	0.0118496
0.24	0.00784144	0.00574736	0.0108029	0.00858075	0.00728394	0.0105572	0.0119912
0.25	0.0080307	0.00586799	0.0109717	0.00874824	0.00737413	0.0107401	0.0121684
0.26	0.00817826	0.0059549	0.011128	0.00886852	0.00752306	0.0107535	0.0123456
0.27	0.00842259	0.00607264	0.0112565	0.00903985	0.00763157	0.010888	0.0124778
0.28	0.00847987	0.00611855	0.011364	0.00911178	0.00771676	0.0109939	0.0126778
0.29	0.00858823	0.00617318	0.0114989	0.00921192	0.00785423	0.01108	0.0128617
0.3	0.00871152	0.00621872	0.0115728	0.00927833	0.00787725	0.0111901	0.0130422
0.31	0.00879936	0.00624235	0.0117504	0.00932427	0.00792584	0.0111829	0.0132392
0.32	0.00897908	0.00625066	0.0119404	0.00939425	0.00797669	0.01119	0.0133944
0.33	0.00905777	0.00624984	0.0119517	0.00950414	0.00800682	0.0111344	0.0135473
0.34	0.00896455	0.00627898	0.0119949	0.00960015	0.00807258	0.0111545	0.0136991
0.35	0.00909222	0.00626574	0.0120251	0.00977761	0.00811124	0.0110993	0.0137999
0.36	0.00919723	0.00629279	0.0119341	0.0099002	0.00815167	0.0111301	0.0139317
0.37	0.00913183	0.00633729	0.0119361	0.0100099	0.00817989	0.0110868	0.0140859
0.38	0.00917595	0.00635776	0.0119875	0.0100699	0.00820445	0.0109863	0.0142147
0.39	0.00914675	0.00639596	0.0120104	0.0101537	0.00821006	0.0109552	0.0142953
0.4	0.00907428	0.00641702	0.0119975	0.0102154	0.00824656	0.0108546	0.0143254
0.41	0.00906578	0.0064549	0.0120259	0.0103016	0.00820347	0.010844	0.0143906
0.42	0.00906082	0.00644676	0.0120396	0.0103542	0.00823632	0.0108181	0.0144592
0.43	0.00916202	0.00642556	0.0120705	0.0104356	0.00826658	0.0107465	0.0144843
0.44	0.00906228	0.00642124	0.0120661	0.010538	0.00825032	0.0106687	0.0145204
0.45	0.00905319	0.00639784	0.0120124	0.0105892	0.00829895	0.0105676	0.0145687
0.46	0.00897867	0.00641648	0.0120079	0.0106557	0.0083232	0.0105449	0.0146448
0.47	0.00891313	0.00641833	0.011936	0.010722	0.00837117	0.0104662	0.0146631
0.48	0.00892429	0.00641076	0.0118188	0.0107841	0.00836178	0.0103681	0.0146914
0.49	0.00882398	0.00639584	0.0117837	0.0108359	0.00838812	0.0103612	0.0146917
0.5	0.00872099	0.00639149	0.0116814	0.0109158	0.0084185	0.0103363	0.0147015
0.51	0.00864678	0.00637247	0.011637	0.0109624	0.00842953	0.0102923	0.0147049
0.52	0.00857387	0.0063638	0.0115626	0.0110141	0.00845711	0.0102385	0.0146764
0.53	0.00850165	0.00634583	0.0114102	0.0110559	0.00848385	0.0101395	0.0146645
0.54	0.00853434	0.00633831	0.0113318	0.0110692	0.00849654	0.0100389	0.0146371
0.55	0.00838887	0.00631201	0.0112845	0.0110626	0.00851027	0.00998259	0.0146511
0.56	0.00834221	0.00631592	0.0112046	0.0110648	0.00852983	0.00992407	0.0146134
0.57	0.00837996	0.00628924	0.0111703	0.0110459	0.00857929	0.00990749	0.0146156
0.58	0.00828485	0.00628673	0.0110497	0.0110069	0.00859593	0.00988833	0.0145954
0.59	0.00825103	0.00626164	0.0109904	0.0109512	0.00859405	0.00985799	0.0146216
0.6	0.00822417	0.00625331	0.0109063	0.0109481	0.00861761	0.00979559	0.0146101
0.61	0.00821138	0.00623215	0.0108493	0.0108985	0.0086039	0.00971765	0.0145973
0.62	0.00814949	0.00622381	0.0107768	0.0108207	0.00860573	0.00965152	0.0145473
0.63	0.00810103	0.00622462	0.0107083	0.0108164	0.00864378	0.00956914	0.0144845
0.64	0.00801065	0.00622202	0.0106109	0.0107964	0.00864304	0.00952598	0.0144597
0.65	0.00797984	0.00619439	0.0105418	0.0107535	0.00866613	0.00938063	0.0144564
0.66	0.00795862	0.00615609	0.0105299	0.0107184	0.00868669	0.00935281	0.0144192
0.67	0.00793672	0.00617709	0.0104051	0.0106782	0.00867334	0.00935269	0.0143802
0.68	0.00792568	0.00619329	0.0103569	0.0106768	0.00866044	0.00930683	0.0143584
0.69	0.0078708	0.00619631	0.0103592	0.0106306	0.00865695	0.00925993	0.0143257
0.7	0.00788469	0.00621671	0.0103229	0.0105796	0.00866758	0.00914615	0.0143004
0.71	0.00797176	0.0062083	0.010311	0.010538	0.00866085	0.00911111	0.0142289
0.72	0.00803293	0.00615608	0.0102362	0.0104923	0.00862979	0.00905144	0.0141643
0.73	0.00800142	0.00614281	0.0102227	0.0104503	0.00858987	0.00906135	0.01412
0.74	0.00800884	0.00614397	0.010197	0.0103967	0.00855459	0.00908177	0.0140685
0.75	0.0079362	0.00610473	0.0101776	0.0103371	0.00856683	0.00906249	0.0140144
0.76	0.00787964	0.00607264	0.0101183	0.0102956	0.00850956	0.00901325	0.0139506
0.77	0.00787513	0.00604988	0.0100435	0.0102078	0.00846913	0.00900821	0.0139081
0.78	0.00788309	0.00604012	0.00994139	0.0101778	0.00845306	0.00899557	0.0138596
0.79	0.00783474	0.0060342	0.00988986	0.0101198	0.00842577	0.00897736	0.0137866
0.8	0.00781356	0.00605104	0.0097827	0.0100577	0.00841454	0.00894585	0.0137144
0.81	0.0078075	0.0060703	0.00970309	0.00999688	0.0084236	0.00890462	0.0136232
0.82	0.00781883	0.00607415	0.00964275	0.00993517	0.00842254	0.00883919	0.0135667
0.83	0.00776086	0.00610546	0.00956697	0.00985219	0.00843701	0.00881829	0.0134904
0.84	0.00782692	0.00613088	0.00949785	0.00979332	0.00844432	0.00880813	0.0134153
0.85	0.00786606	0.00613179	0.00937778	0.00971656	0.00843692	0.00880357	0.0133368
0.86	0.00794998	0.00614817	0.00934923	0.00967145	0.00844278	0.00878522	0.0132723
0.87	0.00797189	0.00617272	0.00922075	0.00957451	0.00842754	0.0087592	0.013181
0.88	0.00795294	0.00617548	0.00913326	0.00951472	0.00842998	0.008724	0.0130752
0.89	0.00794187	0.00619492	0.00901663	0.00944466	0.00841937	0.00870263	0.0130047
0.9	0.00795676	0.00619647	0.00886194	0.00936535	0.00844854	0.00871727	0.0128946
0.91	0.00797313	0.00620512	0.0087084	0.00927036	0.00846103	0.0087093	0.0127619
0.92	0.00796934	0.00619507	0.00855181	0.00915301	0.00845158	0.00868076	0.0126866
0.93	0.00796543	0.00616872	0.00848166	0.00905332	0.00847331	0.0086722	0.0125717
0.94	0.00794157	0.00616158	0.00837525	0.00899395	0.00849857	0.00865801	0.0124522
0.95	0.0079515	0.00613051	0.00826433	0.00893993	0.00847927	0.00863549	0.0123871
0.96	0.00792263	0.00614351	0.00821493	0.00888038	0.00845454	0.00863678	0.0123152
0.97	0.00790082	0.00614337	0.00813911	0.00880743	0.00840448	0.00861699	0.0122527
0.98	0.0079136	0.00614827	0.00807691	0.00875974	0.00838321	0.00855345	0.0122124
0.99	0.00791069	0.00612292	0.00801748	0.00869792	0.00833037	0.00853316	0.0121385
