# Supplementary material for: Bilateral regulation of EGFR activity and local PI(4,5)P2 dynamics in mammalian cells observed with superresolution microscopy
Source: eLife journal article supplement (doi:10.7554/elife.101652), 2024-10-09
Supplement: fig6-figsupp1-data1 [file elife-101652-fig6-figsupp1-data1-v1.zip]

## Sheet: control
	cell#1	cell#2	cell#3	cell#4	cell#5	cell#6	cell#7	cell#8	cell#9
0.01	0.00910936	0.013424	0.0222917	0.0137076	0.0108171	0.0203265	0.0157306	0.0154791	0.0133346
0.02	0.0176061	0.0254304	0.040623	0.0259542	0.0207425	0.0372092	0.0295034	0.0296121	0.0255839
0.03	0.0247225	0.035305	0.0535236	0.0361128	0.0291778	0.0496605	0.0404736	0.0412676	0.0359845
0.04	0.0305396	0.043016	0.0619383	0.0440499	0.0357698	0.0580936	0.0487852	0.0505094	0.0444871
0.05	0.0351606	0.0488765	0.0672735	0.0501876	0.0408739	0.0638489	0.0546995	0.057469	0.0511065
0.06	0.0388803	0.0534188	0.0704889	0.0550167	0.0447099	0.0675744	0.0588667	0.0625816	0.0561686
0.07	0.0419355	0.0569362	0.0725509	0.0587208	0.0475805	0.0701306	0.0618726	0.0662245	0.0600581
0.08	0.0445002	0.0597383	0.0739073	0.0616388	0.0497303	0.0718469	0.0639915	0.068871	0.0629536
0.09	0.046574	0.0619995	0.0747241	0.0639088	0.0512308	0.0729113	0.0653133	0.0705638	0.0650605
0.1	0.0481939	0.063741	0.0750496	0.0655618	0.0522213	0.0734988	0.0660655	0.0716516	0.0665223
0.11	0.049444	0.0650329	0.0750564	0.0667441	0.0528059	0.0737657	0.0663013	0.0721083	0.0674196
0.12	0.0503505	0.0659442	0.0747545	0.067509	0.0530337	0.0736412	0.0662363	0.07216	0.0678389
0.13	0.0509539	0.0666041	0.0743055	0.0679712	0.0530103	0.0733867	0.0658962	0.0718443	0.0678768
0.14	0.0513219	0.066991	0.0736831	0.0680992	0.0527513	0.072919	0.0653189	0.0712735	0.0676853
0.15	0.0514666	0.0671779	0.0729706	0.0679911	0.0522901	0.0723375	0.0645641	0.0704732	0.0672127
0.16	0.0514167	0.0672031	0.0720767	0.0676568	0.0516884	0.0715529	0.0636806	0.0695661	0.0665412
0.17	0.0511959	0.0670564	0.0710868	0.067147	0.0509481	0.0706596	0.0626584	0.0684568	0.0657147
0.18	0.0508423	0.0668103	0.070065	0.0665155	0.0501203	0.0696481	0.0614911	0.0672355	0.0647696
0.19	0.0503535	0.0664386	0.0689251	0.0657274	0.0491725	0.0685574	0.0602173	0.0659261	0.0636846
0.2	0.0497372	0.0659408	0.0677394	0.0648075	0.0481529	0.0673817	0.0588142	0.0645628	0.0625126
0.21	0.0490343	0.0653596	0.0665236	0.0638178	0.0470959	0.066128	0.057329	0.0630898	0.0612306
0.22	0.0482302	0.0646611	0.0652587	0.0627484	0.0459738	0.0649083	0.0557997	0.0615254	0.0599297
0.23	0.0473719	0.0638977	0.0639323	0.0616	0.0448011	0.0636401	0.0542267	0.0598944	0.0585595
0.24	0.0464742	0.0630986	0.0625532	0.060407	0.0435875	0.0623613	0.0526291	0.0582462	0.057133
0.25	0.0455027	0.0622382	0.0611801	0.0591941	0.0423415	0.0610125	0.0510091	0.0565951	0.0557198
0.26	0.044518	0.0613373	0.059858	0.0579488	0.0410823	0.0596007	0.0494434	0.0549278	0.0542362
0.27	0.0434991	0.0604048	0.0586015	0.0566756	0.0398051	0.0582476	0.0478398	0.0532523	0.0527718
0.28	0.0424596	0.059426	0.0573358	0.0553669	0.0385063	0.0569065	0.0462486	0.0515982	0.0512748
0.29	0.041406	0.0584218	0.0560673	0.0540982	0.0372206	0.0555531	0.0446291	0.0500033	0.0498048
0.3	0.0403758	0.057436	0.0548099	0.052766	0.0359454	0.0541629	0.0430769	0.0483922	0.0483006
0.31	0.0393265	0.0564471	0.0535976	0.0514299	0.0346648	0.0527696	0.0414996	0.0467946	0.0468377
0.32	0.0382804	0.0554385	0.0523669	0.0500888	0.0333915	0.0513967	0.0398946	0.0452583	0.0454005
0.33	0.0372342	0.0544338	0.0511681	0.0487825	0.0321756	0.0500622	0.0383312	0.0437554	0.043955
0.34	0.0362122	0.0534142	0.0500045	0.0474641	0.0309747	0.0487081	0.0367799	0.0422922	0.0425181
0.35	0.0352197	0.0523848	0.0488731	0.0461982	0.0298185	0.0474114	0.0352302	0.0408946	0.0411099
0.36	0.0342171	0.0514077	0.0477153	0.0449526	0.0287133	0.046164	0.033729	0.039472	0.0397269
0.37	0.0332563	0.0504328	0.0465675	0.0437294	0.0276188	0.0449095	0.0322768	0.0381065	0.0384357
0.38	0.0322894	0.0494911	0.0454815	0.0424965	0.0265527	0.043655	0.0308809	0.0367748	0.03718
0.39	0.0313581	0.0485547	0.0444404	0.0413172	0.025538	0.0424125	0.0295061	0.0354879	0.0359466
0.4	0.0304617	0.0476746	0.0434583	0.0401669	0.0245609	0.0412419	0.0281742	0.0342634	0.0347863
0.41	0.0295845	0.0468187	0.0425439	0.0391017	0.0236436	0.0401035	0.0269088	0.0331269	0.0336473
0.42	0.0287807	0.0460115	0.0417062	0.0380668	0.022766	0.0390221	0.025726	0.0320314	0.0325664
0.43	0.0279979	0.0452399	0.0408747	0.0370754	0.0219397	0.0379419	0.0245325	0.031002	0.0315326
0.44	0.0272832	0.0445311	0.0400791	0.0361321	0.0211545	0.0369391	0.0234226	0.0300162	0.0305299
0.45	0.0266146	0.0438555	0.0392958	0.035229	0.0204235	0.0359612	0.0223731	0.0290689	0.0295702
0.46	0.0259953	0.0432445	0.0384985	0.0343647	0.0197687	0.0350681	0.0213496	0.0281936	0.0286773
0.47	0.0254165	0.0426472	0.0377851	0.0335533	0.0191652	0.0342738	0.0203639	0.0273563	0.027821
0.48	0.0248901	0.0420918	0.0370724	0.0327951	0.0186005	0.0335149	0.0195055	0.0265787	0.0270455
0.49	0.0243879	0.0415432	0.0364306	0.0320793	0.0180834	0.0328178	0.0187038	0.0258521	0.0263423
0.5	0.0239392	0.0410368	0.0358681	0.0313937	0.0176245	0.0322113	0.0179749	0.0251273	0.0256963
0.51	0.0235461	0.0405768	0.0353464	0.0307481	0.0171805	0.031713	0.0173208	0.0244821	0.0250895
0.52	0.023164	0.0401579	0.0348496	0.0301627	0.0167816	0.0312065	0.0167325	0.0238322	0.0245526
0.53	0.022812	0.0397779	0.0343492	0.0296039	0.0164015	0.0307947	0.0161884	0.0232398	0.0240361
0.54	0.0224934	0.0394171	0.033883	0.0291027	0.0160679	0.0304129	0.0157022	0.0226593	0.0235489
0.55	0.0221988	0.039114	0.0334796	0.0286341	0.0157361	0.0300144	0.0152449	0.0221136	0.0231133
0.56	0.0219156	0.0388019	0.0331391	0.0281854	0.0154465	0.0296736	0.0148103	0.0216104	0.0226734
0.57	0.0216597	0.0384913	0.0328102	0.0277769	0.0151718	0.0293435	0.0144365	0.0210957	0.0222479
0.58	0.0214379	0.0382157	0.0325235	0.0273866	0.0149283	0.0290085	0.0140929	0.0206404	0.0218792
0.59	0.0212308	0.0379567	0.0322376	0.0270367	0.014707	0.0287028	0.0138054	0.0201945	0.0215299
0.6	0.0210139	0.0377236	0.0319367	0.0267249	0.0145108	0.0283758	0.01351	0.0197449	0.0212048
0.61	0.0208067	0.0375105	0.0315919	0.0264089	0.0143385	0.0280397	0.013209	0.0192854	0.0209118
0.62	0.0206034	0.0372832	0.0312613	0.0261165	0.0141822	0.0277039	0.0129461	0.0188315	0.0206408
0.63	0.0204296	0.0370668	0.0309339	0.025854	0.0140535	0.0274096	0.0127203	0.0183986	0.0203851
0.64	0.0202661	0.0368749	0.0305808	0.0255939	0.0139162	0.0270428	0.0124774	0.0179675	0.0201563
0.65	0.0201128	0.0366848	0.0302818	0.0253085	0.0137882	0.0267078	0.0122457	0.0175241	0.0199344
0.66	0.0199582	0.036486	0.0299525	0.0250476	0.0136609	0.0263777	0.0119988	0.017121	0.0197398
0.67	0.0198164	0.0362862	0.0296335	0.0247859	0.0135416	0.0260581	0.0117514	0.0167239	0.0195415
0.68	0.019684	0.0361019	0.0293275	0.0245197	0.0134419	0.0257471	0.0114908	0.0163393	0.0193827
0.69	0.0195554	0.0359527	0.0290515	0.0242456	0.013327	0.0254204	0.0112227	0.0159643	0.019203
0.7	0.019409	0.0357687	0.0287437	0.0239572	0.0132213	0.0251152	0.010932	0.0156177	0.0190288
0.71	0.0192675	0.0355926	0.0284949	0.0236859	0.0131049	0.0248273	0.0106218	0.015258	0.01886
0.72	0.0191218	0.0353973	0.0282263	0.0233993	0.0129593	0.0245269	0.010279	0.0149128	0.0186851
0.73	0.0189728	0.0352079	0.0279602	0.0231328	0.0128214	0.0242438	0.00994589	0.0145805	0.0185105
0.74	0.0188132	0.0350082	0.0276879	0.0228194	0.0126655	0.0239856	0.00960164	0.0142499	0.0183104
0.75	0.0186773	0.0348018	0.0274011	0.0225266	0.0125068	0.0237219	0.00922087	0.0139468	0.0181262
0.76	0.0185439	0.0345921	0.0271321	0.0222436	0.0123478	0.0235034	0.00885376	0.0136448	0.017908
0.77	0.018415	0.0343743	0.0268198	0.0219424	0.0121918	0.0233207	0.00844535	0.0133165	0.0176491
0.78	0.0182757	0.0341243	0.0265212	0.0216549	0.0120284	0.0231445	0.00804704	0.0130209	0.0173955
0.79	0.0181383	0.0338812	0.0261887	0.0213836	0.0118623	0.0229406	0.00767292	0.0127196	0.0171316
0.8	0.0180074	0.0336318	0.0258883	0.0210958	0.011691	0.022729	0.00730081	0.0124426	0.0168638
0.81	0.0178629	0.0333744	0.0255675	0.0208373	0.0115042	0.0224944	0.00692144	0.0121726	0.0166147
0.82	0.0177259	0.033117	0.0252478	0.0205701	0.0113427	0.0222329	0.00655733	0.0119261	0.0163546
0.83	0.0175855	0.0328575	0.0249588	0.0203055	0.0111782	0.0219652	0.00617373	0.0116685	0.0160986
0.84	0.0174382	0.0326135	0.0246778	0.0200591	0.011018	0.0217246	0.00581361	0.0114379	0.0158158
0.85	0.0172872	0.032353	0.0244012	0.0198166	0.0108791	0.0214686	0.00542029	0.0112287	0.0155617
0.86	0.0171366	0.0321043	0.0241334	0.0195772	0.0107304	0.0211898	0.00505189	0.010994	0.0152848
0.87	0.0169923	0.0318327	0.0238655	0.0193335	0.0105781	0.0209295	0.00466147	0.0108137	0.0149884
0.88	0.0168295	0.0315574	0.0235768	0.0190767	0.0104364	0.0206311	0.00428558	0.0106282	0.0146865
0.89	0.0166572	0.0312814	0.0232767	0.0188206	0.0103127	0.0203147	0.0039301	0.0104415	0.0143793
0.9	0.0164868	0.0309894	0.0229405	0.0185819	0.0101654	0.0200195	0.00358217	0.0102228	0.0140594
0.91	0.0162937	0.0306768	0.0226058	0.018353	0.0100426	0.0197476	0.0032134	0.0100047	0.0137481
0.92	0.0161075	0.0303741	0.0222557	0.0181266	0.00990472	0.0194749	0.00288224	0.00977143	0.0134424
0.93	0.0159264	0.0300616	0.0219277	0.0179232	0.00977925	0.0192441	0.00252651	0.00951889	0.0131615
0.94	0.0157576	0.0297476	0.0215919	0.0177015	0.00965815	0.0190222	0.00216444	0.00926905	0.0128806
0.95	0.0155957	0.0293998	0.0212243	0.0174955	0.00954069	0.0188109	0.0017893	0.00902598	0.0125982
0.96	0.0154215	0.0290587	0.0208533	0.0172898	0.00944522	0.018592	0.00141041	0.00874625	0.0123306
0.97	0.0152568	0.0287075	0.0205027	0.0170798	0.00934696	0.0183852	0.0010363	0.00847035	0.0120868
0.98	0.015087	0.0283405	0.0201632	0.0168721	0.0092516	0.0181843	0.000687182	0.00819014	0.0118377
0.99	0.0149165	0.0279917	0.0197968	0.0166462	0.00916228	0.0180239	0.000318152	0.007938	0.0115929

## Sheet: DN PLCG
	cell#1	cell#2	cell#3	cell#4	cell#5	cell#6	cell#7	cell#8	cell#9	cell#10
0.01	0.0125155	0.0102943	0.00710421	0.00671644	0.0135451	0.0126999	0.00864101	0.00686152	0.00833046	0.0106486
0.02	0.0237249	0.0192651	0.0137207	0.0129155	0.0252466	0.0235318	0.0165503	0.0131701	0.0159259	0.0200996
0.03	0.0327946	0.0263621	0.0195061	0.0181148	0.0346074	0.0321387	0.0231603	0.0186448	0.022386	0.027772
0.04	0.0400131	0.0317422	0.0243343	0.0223591	0.0418166	0.0386559	0.0285262	0.0232824	0.0276855	0.0337925
0.05	0.0456451	0.0357704	0.0284257	0.0257649	0.0473087	0.0435703	0.0328853	0.0272297	0.0319043	0.0384144
0.06	0.0501322	0.0387306	0.0318889	0.0285763	0.0515628	0.0473082	0.0364127	0.0305511	0.0352934	0.0419474
0.07	0.0537612	0.0409936	0.0348956	0.0309297	0.0549401	0.0502399	0.0393737	0.0334616	0.0380212	0.0447684
0.08	0.0568163	0.0428315	0.0374953	0.0329615	0.0576901	0.0526635	0.0418235	0.0360345	0.0402402	0.0470159
0.09	0.0591856	0.0441679	0.0396732	0.0345585	0.059881	0.0545952	0.0437616	0.0381639	0.0419667	0.0487397
0.1	0.0610249	0.0450746	0.0415135	0.0358306	0.0615271	0.0560729	0.0452877	0.0399221	0.0433268	0.0500503
0.11	0.0624248	0.0456239	0.0429762	0.0367928	0.0627103	0.0571384	0.0463918	0.0413576	0.044341	0.0509536
0.12	0.0634362	0.0458727	0.0441672	0.0374888	0.0635379	0.0578981	0.0471528	0.0424953	0.045044	0.0515684
0.13	0.0641709	0.0459068	0.0451124	0.0379673	0.064056	0.0583842	0.0476028	0.0433558	0.0455228	0.0519237
0.14	0.0646102	0.0457514	0.0458403	0.0382474	0.0642544	0.0586432	0.0478165	0.0439795	0.0457438	0.0520829
0.15	0.0648082	0.0454484	0.0463418	0.0383609	0.0642577	0.0587065	0.0477793	0.0444017	0.0457851	0.0520848
0.16	0.0647965	0.0450026	0.0466889	0.0383371	0.06403	0.0585979	0.047561	0.0446087	0.0456507	0.0519114
0.17	0.0645534	0.0444145	0.0468602	0.0381664	0.0636378	0.0583503	0.0471649	0.0446303	0.0453401	0.0515882
0.18	0.0641243	0.0436854	0.0468427	0.0378963	0.0630725	0.0580023	0.0466277	0.0445172	0.0449157	0.0511383
0.19	0.0636028	0.0429098	0.0467287	0.0375169	0.0623787	0.0575422	0.0459746	0.0442824	0.0443766	0.0505691
0.2	0.0629126	0.0420435	0.0464839	0.0370343	0.0615807	0.0569786	0.0452198	0.0439316	0.0437562	0.0498985
0.21	0.0621439	0.0411205	0.0461411	0.0364741	0.0606636	0.0563148	0.044396	0.0434721	0.0430336	0.0491472
0.22	0.0612566	0.0401506	0.0457071	0.0358474	0.0596744	0.0556403	0.0435004	0.0429441	0.0422528	0.04834
0.23	0.0602899	0.0391487	0.0451914	0.0351528	0.0586422	0.054884	0.0425506	0.0422828	0.0414267	0.0474442
0.24	0.0592595	0.038131	0.044608	0.0344087	0.0575253	0.0540952	0.0415317	0.0415911	0.0405188	0.0465189
0.25	0.0581455	0.0370686	0.0439508	0.0336288	0.0563571	0.053237	0.0404757	0.0408425	0.0395902	0.0455489
0.26	0.0569784	0.0359879	0.0432536	0.0328336	0.0551728	0.0523728	0.0393828	0.040067	0.0386181	0.0445378
0.27	0.0558014	0.0349129	0.0425273	0.0320027	0.0539538	0.0515159	0.0382604	0.0392476	0.0376447	0.043504
0.28	0.0545856	0.0338457	0.041755	0.0311474	0.0526964	0.0505996	0.037111	0.0383999	0.0366462	0.0424593
0.29	0.0533095	0.0327773	0.0409625	0.0302728	0.0514563	0.0496585	0.0359592	0.0375284	0.0356436	0.0413891
0.3	0.0520039	0.0317336	0.0401579	0.029383	0.050215	0.0486891	0.0347884	0.0366319	0.0346174	0.040312
0.31	0.0506788	0.0306995	0.0393261	0.028492	0.0489992	0.0477018	0.0336204	0.0357399	0.0335849	0.0392321
0.32	0.0493362	0.0296958	0.0385081	0.0276205	0.0477837	0.0467182	0.0324732	0.0348507	0.0325629	0.0381719
0.33	0.0480261	0.0287232	0.0376837	0.0267572	0.0466004	0.0457594	0.0313375	0.033958	0.0315436	0.0371297
0.34	0.0467274	0.027784	0.0368532	0.025899	0.0454471	0.0448227	0.0302122	0.033084	0.0305434	0.0361364
0.35	0.0454304	0.0268866	0.0360471	0.0250536	0.0443156	0.0438968	0.029112	0.0322272	0.0295641	0.0351418
0.36	0.0441664	0.0259953	0.0352485	0.0242239	0.0431886	0.0429885	0.0280163	0.0313925	0.0285986	0.0341796
0.37	0.0429715	0.0251584	0.0344678	0.0234204	0.04211	0.0420976	0.0269715	0.0305711	0.0276703	0.0332379
0.38	0.041816	0.0243449	0.0336959	0.0226422	0.0410289	0.0412755	0.0259547	0.0297869	0.0267855	0.0323019
0.39	0.0406967	0.0235858	0.0329871	0.0219029	0.040007	0.0404734	0.0249878	0.0290441	0.0259268	0.0314071
0.4	0.0396243	0.0228861	0.0322952	0.0211802	0.0390135	0.0396975	0.0240611	0.0283344	0.0251078	0.0305527
0.41	0.0386276	0.0222374	0.0316352	0.020492	0.038042	0.0389593	0.0231823	0.0276554	0.0243276	0.0297731
0.42	0.0376951	0.021635	0.0310315	0.0198521	0.0370827	0.038275	0.0223451	0.0270359	0.0235851	0.0290356
0.43	0.0368327	0.0210792	0.0304613	0.0192422	0.0361806	0.037649	0.021548	0.0264425	0.0228978	0.028325
0.44	0.0360293	0.0205622	0.0299328	0.0186814	0.0353192	0.0370814	0.020795	0.0258967	0.0222546	0.0276693
0.45	0.0352479	0.0201159	0.0294419	0.0181522	0.0344936	0.0365568	0.0201066	0.0253881	0.0216646	0.0270459
0.46	0.0345121	0.0197253	0.0290108	0.017667	0.0337366	0.0360904	0.01944	0.024923	0.0211181	0.0264736
0.47	0.0338207	0.0193888	0.028624	0.0172267	0.0330316	0.0356559	0.0188392	0.0245045	0.020617	0.0259411
0.48	0.033172	0.0190813	0.0282795	0.0168239	0.0323662	0.0352734	0.0182978	0.0241325	0.0201585	0.0254539
0.49	0.0325853	0.0188142	0.027974	0.016448	0.0317562	0.0349157	0.017782	0.0238065	0.0197366	0.0250028
0.5	0.032043	0.018593	0.0277318	0.0161219	0.0311657	0.0345833	0.0172974	0.0235282	0.0193642	0.0245955
0.51	0.031547	0.0183951	0.0275257	0.0158159	0.0306322	0.0342821	0.0168482	0.0233018	0.0190308	0.0241984
0.52	0.0310868	0.0182346	0.0273408	0.0155388	0.0301245	0.0340056	0.0164292	0.0231087	0.0187175	0.0238423
0.53	0.0306651	0.0180684	0.0272012	0.0152997	0.0296356	0.0337473	0.0160712	0.0229522	0.0184261	0.0234924
0.54	0.0302864	0.0179408	0.0270934	0.0150706	0.0291997	0.033507	0.0157243	0.0228382	0.0181798	0.0231845
0.55	0.0299176	0.0178373	0.0270162	0.0148805	0.0288093	0.0333011	0.0153959	0.0227585	0.0179466	0.0228869
0.56	0.0295944	0.017754	0.0269513	0.0147078	0.0284397	0.0331194	0.0151075	0.0227019	0.0177363	0.0226301
0.57	0.0292884	0.017673	0.0269002	0.014545	0.0280856	0.0329622	0.0148402	0.0226607	0.0175461	0.0223745
0.58	0.0289958	0.0176078	0.0268683	0.0143963	0.0277693	0.032834	0.0145871	0.0226288	0.0173648	0.0221252
0.59	0.0287283	0.0175483	0.0268669	0.0142533	0.027479	0.0327149	0.0143616	0.0226074	0.0172195	0.0218861
0.6	0.0284694	0.0175079	0.0268761	0.01413	0.0272031	0.0325989	0.0141559	0.0226045	0.017093	0.0216491
0.61	0.0282189	0.0174756	0.0268952	0.0140087	0.0269258	0.0325028	0.013981	0.022615	0.0169772	0.0214214
0.62	0.0280008	0.0174526	0.0269209	0.0138879	0.0266582	0.0324208	0.0138249	0.0226199	0.0168791	0.0211926
0.63	0.0277912	0.017425	0.0269638	0.0137746	0.0264126	0.032329	0.0136941	0.022634	0.0167757	0.0210006
0.64	0.0275888	0.0173897	0.0270078	0.0136658	0.0261527	0.032258	0.0135756	0.0226451	0.0166851	0.0208099
0.65	0.0273981	0.0173692	0.0270583	0.0135628	0.0259188	0.0321779	0.0134676	0.0226549	0.0166056	0.0206113
0.66	0.027216	0.0173418	0.0271056	0.0134663	0.0256519	0.0320984	0.0133798	0.0226709	0.01652	0.0204105
0.67	0.0270406	0.0173303	0.0271649	0.0133731	0.0253795	0.0319769	0.013296	0.0226639	0.0164281	0.0202232
0.68	0.0268705	0.0173133	0.0272117	0.0132815	0.0250836	0.0318569	0.0132342	0.0226537	0.0163364	0.0200131
0.69	0.0267165	0.0173041	0.0272495	0.0131828	0.0248018	0.0317136	0.0131698	0.0226334	0.0162626	0.0197965
0.7	0.0265537	0.0172988	0.0273038	0.0130806	0.024485	0.0315699	0.0130892	0.0226055	0.0161745	0.0195791
0.71	0.026398	0.0172813	0.0273384	0.0129677	0.0241933	0.0314319	0.0130161	0.0225727	0.0160855	0.0193552
0.72	0.0262327	0.0172423	0.0273534	0.0128609	0.0238741	0.0312677	0.0129357	0.0225317	0.0159911	0.0191438
0.73	0.0260674	0.017219	0.0273628	0.0127452	0.0235496	0.0310858	0.0128426	0.022481	0.0159172	0.0189061
0.74	0.0259101	0.0171965	0.0273685	0.0126361	0.0232403	0.0309103	0.0127504	0.0224277	0.0158232	0.0186873
0.75	0.0257664	0.0171656	0.027355	0.0125176	0.0229076	0.0307166	0.0126547	0.0223641	0.0157394	0.0184666
0.76	0.0256371	0.0171104	0.0273248	0.0124016	0.0225678	0.0305163	0.0125452	0.0222905	0.0156551	0.0182403
0.77	0.0255172	0.0170633	0.0272973	0.0122855	0.0222152	0.030293	0.0124381	0.0222143	0.0155545	0.0180199
0.78	0.0253937	0.0169914	0.0272456	0.0121635	0.0218627	0.0300501	0.0123119	0.0221219	0.0154859	0.0177921
0.79	0.0252915	0.0169181	0.0271902	0.0120404	0.0215274	0.0298102	0.0121925	0.022015	0.0153904	0.0175773
0.8	0.0251883	0.0168487	0.0271324	0.0119182	0.0211517	0.0295451	0.012053	0.0219141	0.015318	0.017357
0.81	0.025107	0.0167752	0.0270427	0.0117816	0.0207973	0.0292728	0.0118986	0.0218062	0.0152288	0.0171485
0.82	0.025013	0.0166755	0.0269598	0.0116484	0.0204449	0.0289904	0.0117505	0.0216946	0.0151497	0.0169492
0.83	0.0249284	0.0165864	0.0268624	0.0115143	0.020096	0.0287191	0.0115948	0.0215767	0.0150652	0.0167635
0.84	0.0248266	0.0164876	0.0267611	0.0113844	0.0197259	0.0284195	0.0114241	0.0214467	0.0149823	0.016591
0.85	0.0247164	0.0163597	0.0266471	0.0112507	0.0193461	0.0281303	0.0112635	0.021304	0.0148868	0.0164261
0.86	0.0246098	0.0162224	0.0265222	0.0111187	0.0189431	0.0278171	0.0110838	0.0211487	0.0147935	0.0162792
0.87	0.0244918	0.0160797	0.0263853	0.0109859	0.0185465	0.0274793	0.0109033	0.0209891	0.014709	0.0161301
0.88	0.0243775	0.0159374	0.0262329	0.0108565	0.018126	0.0271368	0.0107122	0.0208224	0.0146098	0.0159913
0.89	0.0242567	0.0157897	0.0260853	0.0107196	0.0177152	0.0267744	0.0105122	0.0206567	0.0145286	0.0158484
0.9	0.02415	0.0156576	0.0259208	0.0105837	0.0173215	0.0264074	0.010311	0.0204899	0.0144478	0.0157086
0.91	0.0240211	0.0155233	0.0257381	0.0104477	0.0169393	0.0260347	0.0101094	0.0203285	0.0143765	0.0155787
0.92	0.0238828	0.0153931	0.0255601	0.0103127	0.0165739	0.0256678	0.00990574	0.0201589	0.0142912	0.0154495
0.93	0.0237251	0.0152628	0.0253797	0.0101836	0.0162075	0.0253096	0.00970017	0.0199911	0.0142044	0.0153037
0.94	0.0235711	0.015132	0.0251904	0.0100489	0.0158681	0.024938	0.00949828	0.0198169	0.0141154	0.0151567
0.95	0.0234207	0.0150031	0.0250136	0.00992411	0.015509	0.0245747	0.00929117	0.0196485	0.0140351	0.0149991
0.96	0.0232689	0.0148796	0.0248263	0.00979528	0.0151513	0.0242143	0.00908207	0.0194798	0.0139588	0.0148422
0.97	0.0231176	0.0147562	0.0246358	0.00966738	0.0147999	0.0238601	0.00886881	0.0192994	0.0138773	0.0146834
0.98	0.022953	0.0146202	0.0244522	0.00952791	0.0144572	0.023499	0.0086469	0.0191326	0.0137803	0.0145046
0.99	0.0227679	0.0144927	0.0242552	0.00938605	0.014107	0.0231317	0.00841762	0.0189547	0.0136851	0.0143279

## Sheet: wort.
	cell#1	cell#2	cell#3	cell#4	cell#5	cell#6	cell#7	cell#8	cell#9	cell#10
0.01	0.00979557	0.0279116	0.0055079	0.0261997	0.0104166	0.0102329	0.00595784	0.00955959	0.0100077	0.0117366
0.02	0.0182964	0.0501319	0.0105124	0.0459246	0.0195115	0.0189674	0.0115997	0.0179559	0.0188529	0.022419
0.03	0.0251071	0.0645911	0.0147325	0.0587803	0.0263596	0.0257752	0.0167318	0.0247187	0.0260748	0.031258
0.04	0.0305224	0.0730327	0.018204	0.0665482	0.0314011	0.0307658	0.0212669	0.0299062	0.0316971	0.0384768
0.05	0.0349362	0.0774115	0.021007	0.0710694	0.0351796	0.034439	0.0252522	0.0339611	0.0359269	0.0442592
0.06	0.0386493	0.079573	0.0233156	0.0740212	0.0380796	0.0371433	0.0288194	0.0372089	0.0391227	0.0487188
0.07	0.0419147	0.0805082	0.0253223	0.0759442	0.0404702	0.0392967	0.0319653	0.0399788	0.0416946	0.0523588
0.08	0.0448446	0.0809116	0.0270151	0.0773897	0.0424987	0.0410974	0.0348288	0.0423177	0.0437755	0.0552939
0.09	0.0474225	0.080873	0.0284206	0.0785394	0.0441222	0.042546	0.0372251	0.0442107	0.0453734	0.0576133
0.1	0.0496062	0.0805877	0.0295587	0.0793412	0.0454029	0.0436309	0.0391961	0.0456978	0.0465768	0.0593464
0.11	0.0514699	0.0800662	0.0304407	0.0798804	0.0463286	0.044378	0.040812	0.0468385	0.047475	0.0606429
0.12	0.0529835	0.0794318	0.0311006	0.0800965	0.0469884	0.0448828	0.0420599	0.0476567	0.0480723	0.0614978
0.13	0.0542185	0.0786415	0.0315535	0.0800628	0.0474208	0.0451206	0.0430317	0.0482039	0.048475	0.0620355
0.14	0.0552134	0.0776634	0.0318471	0.0798065	0.047653	0.0451652	0.0437096	0.0485588	0.0486874	0.0622739
0.15	0.0559719	0.076457	0.0319584	0.0793803	0.0477251	0.0449953	0.0441787	0.0486743	0.0486907	0.0622942
0.16	0.0565291	0.0751791	0.0319211	0.0787642	0.0475801	0.0447058	0.0444145	0.0486188	0.0485117	0.0621161
0.17	0.0569104	0.0737838	0.0317314	0.0779697	0.0473183	0.04427	0.0444323	0.048421	0.0482363	0.061709
0.18	0.057157	0.0723292	0.0314407	0.0770373	0.0469276	0.0437004	0.0442878	0.0480999	0.047783	0.0611241
0.19	0.057254	0.0708873	0.0310635	0.0759779	0.0464193	0.0430345	0.0439702	0.047648	0.0471996	0.0603967
0.2	0.0572107	0.0694466	0.0305919	0.0748284	0.0458139	0.0422985	0.0435036	0.0471009	0.0465832	0.0595761
0.21	0.057019	0.0680406	0.0300467	0.0735707	0.0451228	0.0414905	0.0429266	0.0464626	0.0458987	0.05863
0.22	0.0567044	0.0666746	0.0294361	0.0722507	0.0443986	0.0405966	0.0422364	0.0457111	0.0451085	0.0575853
0.23	0.0562867	0.0652443	0.0287841	0.070886	0.0435884	0.0396281	0.0414326	0.0449108	0.044303	0.0564209
0.24	0.0557808	0.0638192	0.0281153	0.0694965	0.0427381	0.0386166	0.040534	0.044085	0.0434455	0.0552397
0.25	0.0552071	0.0624115	0.0273898	0.0681124	0.0418522	0.0375977	0.0395647	0.0432067	0.0425271	0.0539404
0.26	0.0545524	0.0609868	0.0266393	0.0666195	0.0409152	0.0365475	0.0385227	0.0422778	0.0415735	0.0525979
0.27	0.0538413	0.059582	0.0258493	0.0651545	0.0400019	0.0354523	0.0374285	0.0413409	0.0406287	0.0512504
0.28	0.0530872	0.0582437	0.0250604	0.0637127	0.0390867	0.0343743	0.0362896	0.0403784	0.0396629	0.0498931
0.29	0.052255	0.0568594	0.0242712	0.0622651	0.0381514	0.0332884	0.0351287	0.0394194	0.0386801	0.0485019
0.3	0.0514035	0.055521	0.0234879	0.0608798	0.0372391	0.0321863	0.0339318	0.0384514	0.0377242	0.047103
0.31	0.0505292	0.0542602	0.0226962	0.0594472	0.036309	0.0310757	0.0327417	0.0375125	0.0367403	0.0457437
0.32	0.0496455	0.0529514	0.0219133	0.0580312	0.0354031	0.029975	0.0315444	0.0365515	0.0358153	0.0443526
0.33	0.0487363	0.0516924	0.0211159	0.0566422	0.0345122	0.0288902	0.0303542	0.0356019	0.0349015	0.0429863
0.34	0.0478321	0.0504635	0.0203386	0.0553078	0.0336159	0.0278115	0.0291757	0.03471	0.0340053	0.0416331
0.35	0.0469301	0.0492877	0.0195781	0.0539547	0.0327587	0.0267523	0.0280164	0.0338616	0.0331342	0.0402811
0.36	0.0460366	0.048156	0.0188468	0.0526088	0.031921	0.0257231	0.0268741	0.0329971	0.0322958	0.0389324
0.37	0.04515	0.047114	0.0181521	0.0512606	0.0311033	0.0247168	0.0257408	0.0322226	0.0314972	0.0376031
0.38	0.0442852	0.0461018	0.0174807	0.0499024	0.0303022	0.0237269	0.0246568	0.0314553	0.0307339	0.0363188
0.39	0.0434498	0.045135	0.0168508	0.0486086	0.0295294	0.0227813	0.023608	0.0307705	0.0299783	0.0350693
0.4	0.0426742	0.0442174	0.016256	0.0473588	0.0287837	0.0218719	0.0226238	0.0301274	0.0292691	0.0338467
0.41	0.0418832	0.0433498	0.0156896	0.046129	0.0280815	0.0210071	0.0216774	0.0295162	0.0286168	0.03266
0.42	0.0411281	0.0425404	0.0151622	0.0449292	0.0274507	0.0201825	0.0208086	0.0289702	0.0280011	0.0315162
0.43	0.0404047	0.0417846	0.0146604	0.043773	0.0268779	0.0194346	0.0199816	0.0284843	0.027438	0.0304671
0.44	0.0397168	0.0410603	0.0141907	0.0426537	0.0263687	0.018728	0.0192022	0.0280268	0.0269004	0.029441
0.45	0.0390558	0.0404009	0.013773	0.0415774	0.0258732	0.0180468	0.0184892	0.0275991	0.026415	0.0284804
0.46	0.0384326	0.0398252	0.0133929	0.0405789	0.0254442	0.017428	0.0178397	0.0272123	0.0259618	0.0276183
0.47	0.037856	0.0392488	0.0130569	0.039603	0.02504	0.0168464	0.017246	0.0268693	0.0255532	0.026817
0.48	0.037333	0.0387235	0.012747	0.0387585	0.0246901	0.0163193	0.0167266	0.0265943	0.025145	0.0260902
0.49	0.0368475	0.0382097	0.0124794	0.0379896	0.0243884	0.015844	0.0162641	0.0263209	0.0247837	0.0254286
0.5	0.0363725	0.037712	0.0122271	0.0372788	0.0241398	0.015424	0.0158538	0.0260867	0.0244604	0.0248126
0.51	0.0359507	0.03724	0.0119966	0.0366454	0.0239464	0.0150489	0.0154879	0.0258795	0.0241745	0.0242534
0.52	0.0355546	0.0367646	0.0117989	0.0360847	0.0237828	0.0147019	0.0151748	0.0257134	0.0239266	0.023731
0.53	0.0351832	0.0363342	0.0116151	0.0355832	0.0236579	0.0144045	0.0148969	0.0255659	0.0237034	0.0232821
0.54	0.0348459	0.0359112	0.011452	0.0350589	0.0235821	0.0141392	0.0146874	0.0254479	0.0235389	0.0228898
0.55	0.0345352	0.0355343	0.0113166	0.0345986	0.0235295	0.0139208	0.01451	0.0253508	0.0233549	0.0225319
0.56	0.034228	0.0351613	0.0111948	0.0341495	0.0235386	0.0137377	0.0143777	0.0252621	0.0232078	0.0222084
0.57	0.0339349	0.0348194	0.0110764	0.0337133	0.0235437	0.0135751	0.0142791	0.0252031	0.0230892	0.0218992
0.58	0.0336775	0.0344779	0.0109728	0.0333186	0.0235572	0.0134323	0.0141967	0.0251519	0.0229902	0.0216313
0.59	0.033429	0.0341725	0.0108717	0.0329532	0.0236058	0.0133125	0.0141356	0.0251095	0.022891	0.021424
0.6	0.0331874	0.0338477	0.010777	0.0325639	0.0236298	0.0132155	0.0141003	0.0250705	0.0227958	0.0212481
0.61	0.0329568	0.0335054	0.0106956	0.0321801	0.0236724	0.0131342	0.0140778	0.0250272	0.022732	0.0211308
0.62	0.0327514	0.0331433	0.0106169	0.0318463	0.0237216	0.013074	0.0140792	0.0249869	0.022663	0.0210529
0.63	0.0325403	0.0328325	0.0105349	0.0315342	0.0237528	0.0130215	0.0140889	0.0249471	0.0226026	0.0210066
0.64	0.03234	0.0325446	0.0104617	0.0311847	0.023796	0.0129677	0.0141168	0.0249149	0.022543	0.0209489
0.65	0.0321369	0.0322572	0.0104002	0.0308063	0.023845	0.0129064	0.0141475	0.0248879	0.0225017	0.0208856
0.66	0.0319278	0.0319988	0.0103223	0.0304459	0.0239247	0.0128448	0.0141858	0.0248727	0.0224517	0.0208527
0.67	0.0317104	0.0317313	0.0102337	0.0300541	0.0239655	0.0127932	0.0142251	0.0248501	0.0224172	0.0208477
0.68	0.0315061	0.0314686	0.0101626	0.0296105	0.0240158	0.0127394	0.0142572	0.0248166	0.0223801	0.0208091
0.69	0.031295	0.0312344	0.0100918	0.0291748	0.0240607	0.0126645	0.0142885	0.024772	0.0223312	0.0207558
0.7	0.0310577	0.0310447	0.0100229	0.028748	0.0241318	0.0126084	0.0143244	0.0247352	0.0222731	0.0207134
0.71	0.0308186	0.0308902	0.00994837	0.0283386	0.0241899	0.0125646	0.0143622	0.0246646	0.0222152	0.0206479
0.72	0.0305679	0.0307763	0.00987182	0.0279476	0.0242315	0.0124994	0.0143828	0.0246009	0.0221363	0.0205732
0.73	0.0303026	0.0306152	0.00979768	0.0275296	0.0242719	0.012438	0.0144018	0.0245194	0.0220583	0.0204971
0.74	0.0300323	0.0304202	0.0097239	0.0271343	0.0243072	0.012374	0.0144217	0.0244291	0.0219412	0.0204204
0.75	0.0297534	0.0301959	0.00965923	0.0267994	0.0243314	0.0123264	0.0144375	0.0243367	0.0218383	0.0203079
0.76	0.0294703	0.0299559	0.009589	0.0264591	0.0243554	0.0122971	0.0144453	0.0242355	0.0217158	0.0202009
0.77	0.0291698	0.0297079	0.00952024	0.0260981	0.0243905	0.0122558	0.014449	0.0241218	0.0215764	0.0200605
0.78	0.0288753	0.0295018	0.00944998	0.0257683	0.0244107	0.0122142	0.0144302	0.0240243	0.0214334	0.0199
0.79	0.0285766	0.0292866	0.00936485	0.0254256	0.0244168	0.0121805	0.0144265	0.0238968	0.0212927	0.0197284
0.8	0.0282647	0.0291494	0.00928369	0.0250601	0.0244229	0.0121394	0.0144062	0.0237715	0.021148	0.0195347
0.81	0.0279245	0.0289686	0.0091901	0.0247024	0.0244163	0.0121097	0.0143774	0.0236318	0.0209798	0.0192788
0.82	0.0275781	0.0287889	0.00910484	0.0243316	0.0243914	0.0120695	0.0143421	0.0234961	0.020811	0.0190297
0.83	0.0272225	0.0286299	0.00901136	0.023938	0.0243502	0.0120261	0.0143025	0.0233348	0.0206431	0.0187552
0.84	0.0268724	0.0284539	0.00892235	0.0235382	0.0242776	0.0119622	0.0142368	0.0231883	0.0204617	0.0184791
0.85	0.0264956	0.028265	0.00882314	0.0231655	0.024191	0.0119031	0.0141813	0.023038	0.0202646	0.0181774
0.86	0.0261111	0.0280693	0.00873161	0.0227482	0.0240811	0.0118365	0.0140943	0.0228716	0.0200451	0.0178982
0.87	0.0257299	0.0278524	0.00862343	0.0223462	0.0239595	0.01177	0.0140149	0.0227009	0.0198364	0.0175853
0.88	0.025338	0.0276584	0.00852572	0.0219666	0.0238391	0.0117082	0.0139306	0.0225188	0.0195952	0.0172632
0.89	0.0249358	0.0274864	0.0084372	0.0215872	0.0237218	0.011635	0.0138326	0.0223548	0.0193531	0.0169315
0.9	0.0245274	0.027285	0.00832969	0.0212085	0.0235942	0.0115572	0.0137283	0.0221846	0.0190974	0.0165758
0.91	0.0241033	0.0271055	0.00822489	0.020788	0.0234666	0.011489	0.0136115	0.0219985	0.0188506	0.0162276
0.92	0.0236745	0.0269408	0.00812104	0.0204032	0.0233358	0.0114049	0.0134896	0.0218147	0.0185919	0.015847
0.93	0.023259	0.0267785	0.00800695	0.0200114	0.023211	0.0113261	0.0133644	0.0216122	0.0183352	0.0154533
0.94	0.0228313	0.0266241	0.00790051	0.019646	0.0230566	0.0112394	0.0132376	0.0213951	0.0180748	0.0150457
0.95	0.0224137	0.0264885	0.00778809	0.0192957	0.0228942	0.0111631	0.0131087	0.0211772	0.0178225	0.0146324
0.96	0.0219879	0.0263518	0.00767434	0.0189307	0.0227425	0.0110645	0.0129701	0.0209462	0.0175763	0.0142104
0.97	0.0215713	0.026202	0.00755559	0.0185688	0.0225605	0.010956	0.0128333	0.0207049	0.01734	0.0137504
0.98	0.021151	0.0260544	0.00743795	0.0181828	0.0223516	0.0108494	0.0126963	0.0204632	0.0170948	0.0133094
0.99	0.020731	0.0258971	0.00732161	0.0178298	0.0221301	0.0107455	0.012558	0.0202072	0.0168642	0.0128735
