# Supplementary material for: Bilateral regulation of EGFR activity and local PI(4,5)P2 dynamics in mammalian cells observed with superresolution microscopy
Source: eLife journal article supplement (doi:10.7554/elife.101652), 2024-10-09
Supplement: fig6-figsupp1-data1 [file Figure 6-supplement 1A.xlsx]

## Sheet: control
	cell#1	cell#2	cell#3	cell#4	cell#5	cell#6	cell#7	cell#8	cell#9
0.01	0.00494899	0.00190057	0.00253323	0.00251056	0.002005	0.00124762	0.00145703	0.00209332	0.00135261
0.02	0.00951134	0.00371557	0.00510793	0.00483317	0.00397838	0.00244116	0.00289634	0.0040918	0.00276356
0.03	0.0136809	0.00544458	0.00755266	0.00700056	0.00588906	0.00361815	0.00428231	0.00612854	0.0041203
0.04	0.0174224	0.00712891	0.00980447	0.00894075	0.00776198	0.00475646	0.00563838	0.00799242	0.00544162
0.05	0.0206145	0.00868415	0.0120211	0.0106782	0.00949502	0.0058464	0.00694587	0.00978452	0.00669697
0.06	0.0232987	0.010172	0.0140894	0.0122714	0.0111858	0.00687559	0.00820785	0.0115126	0.0079595
0.07	0.0256666	0.0115549	0.0160168	0.0137335	0.01287	0.00787688	0.00946198	0.013068	0.00916209
0.08	0.0277668	0.0129418	0.0177571	0.0151316	0.0144863	0.0088305	0.0106893	0.0145713	0.0103313
0.09	0.0293806	0.0141719	0.0193137	0.0163624	0.0159989	0.00973129	0.0118269	0.015934	0.011427
0.1	0.0306406	0.0152859	0.0207497	0.0173706	0.0173513	0.0105405	0.0128759	0.017144	0.0125126
0.11	0.0315251	0.016253	0.0220349	0.0182124	0.0185998	0.0112859	0.013827	0.018205	0.0135327
0.12	0.0321603	0.0171252	0.0231523	0.0189206	0.0197129	0.0119722	0.014706	0.0191435	0.0144783
0.13	0.0326331	0.017919	0.0241826	0.0195687	0.0207267	0.0125884	0.0155212	0.0199572	0.0153823
0.14	0.0329585	0.0186147	0.0250752	0.0201031	0.0216231	0.0131239	0.0162731	0.0207018	0.0162246
0.15	0.0331096	0.0192153	0.0258256	0.0205703	0.0224565	0.0136145	0.0169512	0.0213234	0.016986
0.16	0.033225	0.0197604	0.0264567	0.0209715	0.0231703	0.014045	0.0175609	0.0218346	0.017709
0.17	0.0332714	0.0202283	0.0270233	0.0213316	0.0237807	0.014418	0.0180931	0.0222619	0.018359
0.18	0.0332153	0.0206213	0.0274917	0.021627	0.0243263	0.0147328	0.0185698	0.0226185	0.0189696
0.19	0.0330899	0.0209633	0.0279031	0.0218687	0.0247818	0.0150109	0.0189792	0.0229068	0.0195471
0.2	0.0329823	0.0212481	0.0282245	0.0220924	0.0251227	0.0152283	0.0193334	0.0231352	0.0200514
0.21	0.0328104	0.0214849	0.0284977	0.0222797	0.0254272	0.0154084	0.0196432	0.0232873	0.0205346
0.22	0.0326168	0.0216567	0.0287435	0.0224266	0.0256598	0.0155399	0.0199013	0.023356	0.0209586
0.23	0.032451	0.0217951	0.02895	0.0225264	0.0258198	0.0156307	0.0201017	0.0234158	0.0213389
0.24	0.0322612	0.0218966	0.0290886	0.0226213	0.0259289	0.0156798	0.0202502	0.0233981	0.0216745
0.25	0.0320265	0.0219651	0.0291631	0.0227048	0.0259612	0.0156948	0.020351	0.0233315	0.0219869
0.26	0.0318026	0.0219834	0.0292246	0.0227531	0.0259536	0.0156806	0.0204173	0.0232363	0.0222651
0.27	0.0315935	0.0219923	0.0292638	0.0227952	0.0259008	0.015627	0.020443	0.0231045	0.0224784
0.28	0.0313425	0.0219644	0.029278	0.0227869	0.0257896	0.015543	0.0204417	0.0229317	0.0226622
0.29	0.0311255	0.0219049	0.0292347	0.0227809	0.0256486	0.0154336	0.0203954	0.0227431	0.0228262
0.3	0.0309292	0.0218217	0.0291713	0.0227611	0.025447	0.0152993	0.0203205	0.0225212	0.022953
0.31	0.0306943	0.021726	0.0291027	0.022725	0.0252269	0.0151343	0.0202136	0.0222698	0.0230499
0.32	0.0304377	0.0216147	0.0290098	0.0226495	0.0249757	0.0149576	0.0200842	0.0220055	0.0231181
0.33	0.0301968	0.0214859	0.0289143	0.0225746	0.0246995	0.0147682	0.0199312	0.0217062	0.023161
0.34	0.0299632	0.0213436	0.0288084	0.0225022	0.024411	0.0145572	0.0197669	0.0213955	0.0231838
0.35	0.0297293	0.0211873	0.0286557	0.0224139	0.0240948	0.0143375	0.0195896	0.0210878	0.0231962
0.36	0.0294877	0.0210264	0.0285125	0.022322	0.023763	0.0140992	0.0193886	0.0207622	0.02316
0.37	0.0292391	0.0208674	0.0283635	0.022216	0.0234163	0.0138512	0.0191664	0.0204093	0.0231238
0.38	0.0289802	0.0206934	0.0281946	0.0221292	0.0230662	0.0135954	0.0189361	0.0200725	0.0230622
0.39	0.0287049	0.0205185	0.0280109	0.0220339	0.02271	0.0133323	0.0186949	0.0197177	0.0229866
0.4	0.0284595	0.0203435	0.0278476	0.0219324	0.022336	0.0130675	0.0184549	0.0193549	0.0228948
0.41	0.0282157	0.0201715	0.0276822	0.0218393	0.0219749	0.0128022	0.0182106	0.0189736	0.0227964
0.42	0.0280153	0.0199984	0.0275218	0.0217394	0.0216101	0.0125324	0.0179682	0.0186106	0.0226931
0.43	0.0278157	0.0198223	0.0273676	0.0216325	0.0212471	0.0122659	0.0177068	0.0182506	0.0225728
0.44	0.0276019	0.0196526	0.0272028	0.0215105	0.0208853	0.0119967	0.0174507	0.0178801	0.0224717
0.45	0.0274003	0.0194837	0.0270047	0.0214024	0.0205169	0.0117343	0.0171863	0.0175123	0.0223362
0.46	0.0272261	0.0193218	0.0268627	0.0212987	0.0201652	0.011474	0.0169193	0.0171694	0.0221926
0.47	0.0270392	0.0191701	0.0267142	0.0212022	0.0198306	0.0112203	0.0166611	0.0168371	0.0220382
0.48	0.0268807	0.0190304	0.0265584	0.021099	0.0194945	0.0109677	0.0164036	0.0165027	0.0218673
0.49	0.0267351	0.0188889	0.0264101	0.0209948	0.0191706	0.0107154	0.0161459	0.0161625	0.0217043
0.5	0.026592	0.0187402	0.026259	0.0208767	0.0188568	0.0104723	0.015887	0.0158253	0.0215501
0.51	0.0264684	0.0186014	0.0260985	0.0207666	0.0185452	0.0102333	0.0156342	0.0154995	0.0213858
0.52	0.0263423	0.0184704	0.0259537	0.0206528	0.0182446	0.0100013	0.0153779	0.0151905	0.0212191
0.53	0.0262291	0.0183442	0.0258246	0.0205411	0.0179545	0.00978174	0.0151291	0.0148838	0.0210361
0.54	0.0261058	0.018226	0.0256689	0.0204301	0.0176959	0.00956474	0.0148848	0.0145873	0.0208646
0.55	0.0259996	0.0181154	0.0255547	0.0203118	0.0174366	0.00935448	0.0146485	0.0142974	0.0207009
0.56	0.0259085	0.0180095	0.0254311	0.0202007	0.0171783	0.00915074	0.0144162	0.014008	0.0205186
0.57	0.0258463	0.017906	0.0252836	0.0200863	0.0169264	0.0089496	0.014183	0.0137341	0.0203441
0.58	0.0257626	0.0178049	0.0251584	0.0199757	0.0166911	0.00875764	0.0139541	0.013455	0.020158
0.59	0.0256974	0.0177078	0.0250345	0.0198656	0.0164564	0.00856618	0.013724	0.013204	0.0199785
0.6	0.0256412	0.0176032	0.0249131	0.0197547	0.0162264	0.00838454	0.0135064	0.0129498	0.0197994
0.61	0.0255772	0.0175145	0.0247908	0.0196482	0.0160127	0.00820679	0.0132944	0.0127007	0.019619
0.62	0.0254926	0.0174186	0.024669	0.0195399	0.0158094	0.00803687	0.0130888	0.0124475	0.0194331
0.63	0.0254323	0.0173199	0.0245455	0.0194262	0.0156135	0.00787965	0.0128827	0.0122056	0.0192508
0.64	0.0253888	0.0172287	0.0243984	0.0193118	0.0154132	0.00772085	0.0126811	0.0119791	0.0190673
0.65	0.0253088	0.0171273	0.0242534	0.0191963	0.0151968	0.00756635	0.0124767	0.0117418	0.0188797
0.66	0.0252558	0.0170274	0.0241041	0.0190757	0.0150013	0.00741506	0.0122832	0.0115133	0.0186927
0.67	0.0252248	0.0169286	0.0239495	0.0189526	0.0148156	0.00727141	0.0120936	0.0112819	0.0185125
0.68	0.0251503	0.0168287	0.0237974	0.018839	0.0146325	0.00713142	0.0119111	0.011055	0.018336
0.69	0.0251061	0.0167295	0.0236473	0.0187213	0.0144555	0.0069958	0.0117293	0.0108266	0.018151
0.7	0.0250419	0.0166171	0.0234895	0.0186019	0.0142623	0.00686536	0.0115466	0.0106036	0.0179659
0.71	0.0249679	0.0165118	0.0233381	0.0184807	0.0140732	0.00674096	0.0113673	0.0103751	0.0177743
0.72	0.024893	0.0163989	0.0231781	0.0183512	0.0138875	0.00661933	0.0111859	0.0101582	0.0175966
0.73	0.0248445	0.0162794	0.023021	0.0182163	0.0137036	0.00650158	0.0110053	0.00992394	0.0174214
0.74	0.0247699	0.0161412	0.0228633	0.0180874	0.0135163	0.00638555	0.0108387	0.0097036	0.0172243
0.75	0.0247124	0.0160112	0.0226889	0.017952	0.0133365	0.0062771	0.0106696	0.00949417	0.0170263
0.76	0.0246361	0.0158783	0.0225137	0.0178194	0.0131507	0.00616791	0.0105018	0.00929687	0.0168385
0.77	0.0245745	0.0157345	0.022354	0.0176767	0.012966	0.00606418	0.0103347	0.00907929	0.0166541
0.78	0.0245003	0.0155935	0.0221854	0.017533	0.0127914	0.00596043	0.0101705	0.00887918	0.0164522
0.79	0.0244405	0.0154425	0.022029	0.0174047	0.0126105	0.00586671	0.0100026	0.00866791	0.0162559
0.8	0.0243692	0.0152883	0.0218556	0.0172705	0.0124242	0.00577274	0.0098408	0.0084829	0.0160621
0.81	0.0242996	0.0151282	0.0216907	0.0171316	0.0122435	0.00568157	0.00968291	0.00828716	0.01587
0.82	0.0242473	0.0149721	0.0215214	0.0169939	0.012065	0.00559481	0.00952426	0.0080727	0.0156679
0.83	0.0241795	0.0148097	0.0213506	0.0168593	0.0118876	0.00550921	0.00936978	0.00787405	0.0154726
0.84	0.0240998	0.014645	0.0211659	0.0167098	0.0117008	0.00542953	0.00921037	0.00765865	0.0152725
0.85	0.0240336	0.0144852	0.020977	0.0165598	0.011512	0.00534971	0.00905179	0.00744926	0.0150718
0.86	0.0239529	0.0143105	0.0207919	0.0164231	0.0113245	0.00527299	0.00889841	0.00723949	0.0148638
0.87	0.0238728	0.0141358	0.020613	0.0162747	0.0111415	0.00519677	0.0087519	0.00703736	0.0146692
0.88	0.0237909	0.0139582	0.0204374	0.0161285	0.0109571	0.00512868	0.00860448	0.00684737	0.0144661
0.89	0.0237244	0.0137866	0.0202672	0.0159806	0.0107823	0.00506034	0.00845294	0.00665668	0.0142683
0.9	0.0236421	0.0136079	0.0200964	0.0158313	0.0105979	0.00499085	0.0083059	0.00646365	0.0140684
0.91	0.0235527	0.0134265	0.0199053	0.0156841	0.0104187	0.00491888	0.00815329	0.00627833	0.0138625
0.92	0.023488	0.0132391	0.0197256	0.0155335	0.0102285	0.00485005	0.00800373	0.00608274	0.0136462
0.93	0.0233917	0.0130525	0.0195448	0.0153829	0.0100375	0.00478528	0.00785106	0.00589093	0.0134428
0.94	0.0232927	0.0128634	0.0193496	0.0152331	0.00986091	0.00472366	0.00770512	0.00571068	0.0132333
0.95	0.0231906	0.012675	0.0191714	0.0150802	0.00968438	0.00465944	0.00755847	0.00553183	0.0130297
0.96	0.0231091	0.0124842	0.0189784	0.0149189	0.00949666	0.00459374	0.00741024	0.00534101	0.0128179
0.97	0.0229998	0.0122837	0.018797	0.0147532	0.00930632	0.00452973	0.00726048	0.00514914	0.0126014
0.98	0.0228972	0.0120827	0.0186052	0.0146018	0.00911231	0.00446632	0.00711386	0.00497114	0.012387
0.99	0.022783	0.0118828	0.0184164	0.0144344	0.00892555	0.00440438	0.00695899	0.00478234	0.0121721

## Sheet: DN PLCG
	cell#1	cell#2	cell#3	cell#4	cell#5	cell#6	cell#7	cell#8	cell#9
0.01	0.0023042	0.00283445	0.00554828	0.00546481	0.00334964	0.00527347	0.0064902	0.0042225	0.00415343
0.02	0.00455407	0.005595	0.0111558	0.0108638	0.00668831	0.0104169	0.0128991	0.00840799	0.00828599
0.03	0.00673808	0.00826007	0.0165464	0.0161105	0.00995395	0.0153716	0.019256	0.0124716	0.0123115
0.04	0.00885317	0.0107696	0.0217861	0.0212093	0.0130942	0.0202139	0.0252747	0.0164262	0.0161705
0.05	0.0109246	0.0131829	0.0268685	0.0261132	0.0161123	0.0248524	0.0310487	0.020238	0.0198758
0.06	0.0129266	0.0154824	0.0317396	0.0308111	0.0190115	0.0292829	0.0365403	0.0239069	0.0234162
0.07	0.0148941	0.0176761	0.036374	0.0352892	0.0217562	0.0334977	0.0416836	0.0274303	0.0268104
0.08	0.0168179	0.0198155	0.0407892	0.0395034	0.0243601	0.0375569	0.0465002	0.0307905	0.029984
0.09	0.018609	0.021784	0.0448845	0.043452	0.0267951	0.0412539	0.0509792	0.0339046	0.0329308
0.1	0.0202699	0.0235424	0.0486753	0.0470932	0.0289965	0.0446503	0.0550474	0.0368098	0.0356306
0.11	0.0218132	0.0251375	0.0521499	0.0504162	0.0310094	0.0477524	0.0587132	0.0394668	0.0380898
0.12	0.0232435	0.0265886	0.0553012	0.0534492	0.0328173	0.0505465	0.0619586	0.0418976	0.0403013
0.13	0.024577	0.0279033	0.0581415	0.0561894	0.0344327	0.0531001	0.0648223	0.044107	0.0422569
0.14	0.0258178	0.0290864	0.0606972	0.0586406	0.035871	0.0553348	0.0673498	0.0461026	0.0440159
0.15	0.0269469	0.0301515	0.062964	0.0607995	0.037122	0.0573178	0.0694807	0.047867	0.0455371
0.16	0.0279661	0.0310795	0.0649217	0.0627049	0.0381979	0.0590386	0.0712973	0.0494067	0.0468501
0.17	0.0288597	0.0318935	0.0666115	0.0643685	0.0391025	0.0605062	0.0728226	0.0507468	0.0479645
0.18	0.0296462	0.0325856	0.0680209	0.0657771	0.0398484	0.061759	0.074038	0.051864	0.0488922
0.19	0.0303312	0.0331766	0.0692028	0.0669615	0.0404545	0.0628365	0.0749949	0.0528091	0.0496397
0.2	0.0309371	0.0336789	0.0701485	0.0679452	0.0409249	0.063731	0.0757055	0.0535825	0.0502368
0.21	0.0314647	0.0341021	0.070906	0.0687177	0.0412776	0.0644598	0.0761854	0.0542003	0.0506763
0.22	0.0319009	0.0344359	0.0714652	0.0693206	0.0415045	0.0649803	0.0764606	0.0546528	0.050971
0.23	0.0322418	0.0346927	0.0718134	0.069752	0.0416109	0.0653653	0.0765336	0.0549615	0.0511518
0.24	0.0324912	0.0348702	0.0720124	0.0700204	0.0416132	0.0656012	0.0764513	0.0551201	0.051187
0.25	0.0326685	0.0349955	0.0720533	0.0701442	0.0415263	0.0657213	0.0762198	0.0551593	0.0511086
0.26	0.0327843	0.0350743	0.0719418	0.0701352	0.0413486	0.0657251	0.0758394	0.0550889	0.0509447
0.27	0.0328462	0.0350954	0.0717075	0.07002	0.0410872	0.065646	0.0753551	0.0549172	0.050707
0.28	0.0328545	0.0350791	0.0713676	0.0697937	0.0407672	0.0654764	0.0747469	0.0546601	0.0503863
0.29	0.0328089	0.0350141	0.0709211	0.0694759	0.0403821	0.0652211	0.0740502	0.0543128	0.0499958
0.3	0.0327011	0.0349025	0.0703911	0.0690713	0.0399416	0.0648897	0.0732675	0.0538952	0.0495216
0.31	0.0325489	0.0347702	0.0697654	0.0685881	0.0394553	0.0644773	0.0724291	0.053407	0.0490119
0.32	0.0323525	0.0346024	0.0690764	0.0680414	0.0389157	0.0640389	0.0715072	0.0528675	0.0484569
0.33	0.0321266	0.0344123	0.0683304	0.0674383	0.0383577	0.0635368	0.0705389	0.0522745	0.0478819
0.34	0.0318844	0.0342171	0.0675506	0.0667854	0.0377652	0.0630176	0.0695194	0.0516473	0.0472579
0.35	0.0316134	0.0340041	0.0667265	0.0661063	0.0371576	0.0624537	0.0684952	0.0509969	0.0466209
0.36	0.0313117	0.0337805	0.0658625	0.0653984	0.0365223	0.0618788	0.0674301	0.0503168	0.0459591
0.37	0.0309855	0.0335393	0.0649754	0.0646504	0.0358723	0.0612838	0.0663559	0.0496108	0.045282
0.38	0.0306408	0.0332918	0.0640777	0.063894	0.0352189	0.0606616	0.0652796	0.0488849	0.044584
0.39	0.0302888	0.033039	0.0631695	0.0631119	0.0345521	0.060016	0.0642141	0.0481486	0.0438867
0.4	0.0299346	0.0327866	0.0622604	0.0623302	0.0338848	0.059363	0.0631729	0.0474117	0.0431889
0.41	0.0295829	0.0325389	0.0613656	0.06155	0.0332191	0.0587111	0.0621232	0.0466911	0.0425107
0.42	0.0292268	0.0322818	0.0604578	0.0607751	0.0325536	0.0580602	0.0610808	0.0459694	0.0418321
0.43	0.028864	0.0320295	0.0595659	0.0599952	0.0319011	0.0574024	0.0600653	0.0452586	0.0411631
0.44	0.0284912	0.0317754	0.0586893	0.0592198	0.0312423	0.0567417	0.0590789	0.044549	0.0405001
0.45	0.0281196	0.0315299	0.0578264	0.0584541	0.0305982	0.0560894	0.0581071	0.0438629	0.0398567
0.46	0.0277533	0.0312753	0.0569808	0.0577016	0.02997	0.0554366	0.0571632	0.0431914	0.0392424
0.47	0.0273996	0.0310358	0.0561616	0.0569627	0.0293539	0.0548008	0.0562399	0.0425368	0.0386511
0.48	0.0270569	0.0308161	0.0553825	0.0562522	0.0287544	0.0541861	0.0553577	0.0419108	0.0380766
0.49	0.0267231	0.0305857	0.0546189	0.055555	0.0281665	0.0535689	0.0545189	0.0413093	0.0375402
0.5	0.0263916	0.0303638	0.0538775	0.0548667	0.0275892	0.0529677	0.0536965	0.0407228	0.0370063
0.51	0.0260562	0.030155	0.0531543	0.0541989	0.0270198	0.0523761	0.0529011	0.0401459	0.0365029
0.52	0.0257312	0.0299457	0.0524697	0.0535547	0.0264703	0.0517902	0.0521433	0.0395983	0.0360164
0.53	0.0254216	0.0297419	0.0518022	0.052923	0.0259341	0.0512212	0.0514	0.0390745	0.0355663
0.54	0.0251319	0.0295585	0.0511798	0.0523205	0.0254185	0.0506744	0.0507035	0.0385787	0.0351475
0.55	0.0248551	0.0293805	0.0505776	0.051738	0.0249181	0.0501372	0.050024	0.0380985	0.0347462
0.56	0.0245829	0.0292008	0.0499991	0.0511633	0.024429	0.0496091	0.0493719	0.0376316	0.0343767
0.57	0.0243167	0.0290264	0.049452	0.0506061	0.0239501	0.0490946	0.0487626	0.0371866	0.0340162
0.58	0.0240569	0.028853	0.0489209	0.0500706	0.0234909	0.0485794	0.0481717	0.0367541	0.0336763
0.59	0.0238041	0.0286958	0.0484169	0.049556	0.0230422	0.0480861	0.0475969	0.0363387	0.0333718
0.6	0.0235607	0.0285335	0.0479324	0.0490546	0.0226005	0.0475927	0.0470426	0.035939	0.033067
0.61	0.0233454	0.0283875	0.0474635	0.0485788	0.022179	0.0471122	0.0465127	0.0355572	0.0327875
0.62	0.0231314	0.028233	0.0470257	0.0481137	0.0217618	0.0466265	0.0460215	0.0351928	0.0325133
0.63	0.0229174	0.028094	0.0466065	0.047669	0.0213607	0.0461597	0.0455528	0.0348383	0.0322693
0.64	0.0227094	0.0279519	0.0462052	0.047227	0.020961	0.0456934	0.0450983	0.0344923	0.0320346
0.65	0.0225019	0.0278079	0.0458037	0.0468094	0.0205667	0.0452292	0.0446591	0.034148	0.0318157
0.66	0.0223011	0.0276706	0.045415	0.0464036	0.0201818	0.044766	0.0442494	0.0338169	0.0315968
0.67	0.0221171	0.0275323	0.0450521	0.046011	0.019803	0.0443072	0.0438463	0.0335	0.0313986
0.68	0.0219418	0.0274086	0.0446919	0.0456363	0.0194388	0.04383	0.0434562	0.0331929	0.0312128
0.69	0.0217689	0.0272753	0.0443376	0.0452755	0.0190683	0.0433677	0.0430887	0.0328909	0.0310323
0.7	0.0215959	0.0271476	0.0439893	0.0449156	0.0187006	0.0429078	0.0427343	0.0325939	0.0308595
0.71	0.0214229	0.027021	0.0436374	0.0445702	0.0183293	0.0424377	0.0423949	0.032287	0.0307014
0.72	0.0212543	0.0268896	0.0433054	0.0442247	0.0179635	0.0419728	0.0420675	0.0319896	0.0305478
0.73	0.0210889	0.026756	0.0429809	0.0438953	0.0176047	0.0415088	0.0417416	0.0316995	0.0304015
0.74	0.0209366	0.0266402	0.0426619	0.0435622	0.0172369	0.0410429	0.0414371	0.0314174	0.0302669
0.75	0.0207928	0.0265177	0.0423315	0.0432468	0.0168772	0.0405828	0.0411409	0.0311454	0.0301317
0.76	0.0206464	0.0263948	0.0420091	0.0429287	0.0165194	0.0401139	0.0408549	0.0308707	0.0299997
0.77	0.0204954	0.0262721	0.0416814	0.0426225	0.0161545	0.0396478	0.0405742	0.0305957	0.0298686
0.78	0.0203422	0.0261413	0.041356	0.0423154	0.0157898	0.0391807	0.0402762	0.0303206	0.0297448
0.79	0.0201888	0.0260088	0.0410322	0.0420185	0.0154267	0.0387121	0.0399957	0.0300486	0.0296227
0.8	0.0200447	0.0258804	0.0407125	0.0417232	0.015059	0.0382417	0.0397241	0.0297827	0.029503
0.81	0.0199114	0.0257581	0.0403906	0.0414278	0.0146968	0.0377668	0.0394608	0.0295255	0.0293861
0.82	0.0197805	0.025629	0.0400638	0.0411385	0.0143338	0.0373026	0.0391941	0.0292678	0.0292734
0.83	0.0196429	0.0255005	0.0397383	0.0408474	0.0139687	0.0368296	0.0389423	0.0290043	0.0291638
0.84	0.0194996	0.0253738	0.0393959	0.040563	0.0136038	0.0363497	0.0386922	0.0287464	0.029058
0.85	0.0193562	0.0252357	0.0390479	0.0402734	0.0132355	0.0358706	0.0384473	0.0284893	0.0289462
0.86	0.0192187	0.0250991	0.0387015	0.0399889	0.0128658	0.0353807	0.0382134	0.0282356	0.0288417
0.87	0.0190861	0.0249651	0.0383447	0.0397089	0.0125001	0.0348958	0.0379745	0.0279866	0.028734
0.88	0.0189598	0.024823	0.0379904	0.0394332	0.0121355	0.0344232	0.0377426	0.0277491	0.0286253
0.89	0.0188337	0.0246846	0.0376288	0.0391539	0.0117694	0.0339348	0.0375017	0.0275098	0.0285171
0.9	0.0187028	0.0245425	0.0372602	0.038876	0.0113943	0.0334397	0.0372573	0.0272688	0.0284195
0.91	0.0185658	0.0243906	0.0368776	0.0385957	0.0110255	0.0329477	0.0370226	0.0270314	0.0283137
0.92	0.0184283	0.0242405	0.0364888	0.0383262	0.0106489	0.0324409	0.0367874	0.026789	0.0282088
0.93	0.0182924	0.0240904	0.0360933	0.0380473	0.0102658	0.0319322	0.0365563	0.0265483	0.0281081
0.94	0.0181597	0.0239363	0.0356879	0.0377662	0.00989645	0.0314074	0.036319	0.0263153	0.0279999
0.95	0.0180316	0.0237893	0.0352757	0.0374885	0.00952543	0.0308945	0.0360727	0.0260869	0.0278956
0.96	0.0178998	0.0236328	0.0348646	0.0372108	0.00914953	0.0303796	0.0358335	0.0258581	0.0277809
0.97	0.0177622	0.0234794	0.0344392	0.0369199	0.00877526	0.0298529	0.0355817	0.025626	0.0276729
0.98	0.0176124	0.0233178	0.0340078	0.0366331	0.00839884	0.0293287	0.035332	0.0253905	0.0275568
0.99	0.0174643	0.0231587	0.0335622	0.0363443	0.00802157	0.0288021	0.0350741	0.0251599	0.0274367

## Sheet: wort.
	cell#1	cell#2	cell#3	cell#4	cell#5	cell#6	cell#7	cell#8	cell#9
0.01	0.00980727	0.0167965	0.0186879	0.0136174	0.0118206	0.0134138	0.00981333	0.0105648	0.00979969
0.02	0.0189416	0.0313453	0.036587	0.0265196	0.0228323	0.0266697	0.0183976	0.0204311	0.0207276
0.03	0.0273487	0.0438823	0.0509935	0.0372828	0.0315042	0.0373851	0.0258618	0.0292612	0.0308357
0.04	0.0346199	0.0529454	0.0630875	0.0465655	0.0387404	0.0465722	0.0320739	0.0363829	0.0388297
0.05	0.0409843	0.0602014	0.0724224	0.0534409	0.0442835	0.0540198	0.0378594	0.0424389	0.0461951
0.06	0.0464651	0.0654859	0.0792576	0.0591718	0.0487429	0.0595813	0.0425787	0.0472177	0.0524208
0.07	0.0514583	0.0687067	0.0841943	0.0635265	0.0521569	0.0646371	0.0469967	0.051422	0.0577172
0.08	0.0558681	0.0715549	0.0876339	0.0669737	0.0548787	0.0687373	0.0509743	0.0550037	0.0625499
0.09	0.0596113	0.0731523	0.0895446	0.0693045	0.0565447	0.0712725	0.0542042	0.0575989	0.0662255
0.1	0.0626345	0.0734001	0.0900873	0.0705252	0.0574162	0.072737	0.0567489	0.0592672	0.0687542
0.11	0.065069	0.0731309	0.0894971	0.0708542	0.0574405	0.073306	0.0587665	0.0602121	0.0707148
0.12	0.0670317	0.0722091	0.0882758	0.0704928	0.0571061	0.073415	0.0603619	0.0606781	0.0718349
0.13	0.0686434	0.071271	0.0866091	0.069804	0.0566395	0.0730852	0.0615616	0.0606646	0.0722013
0.14	0.0699272	0.0699329	0.0847702	0.069013	0.0559095	0.0723738	0.0625521	0.0603206	0.072065
0.15	0.0710113	0.0687402	0.0826103	0.0680576	0.0548506	0.0715938	0.0631821	0.060061	0.0719385
0.16	0.0719135	0.0675538	0.0805262	0.0668934	0.0536497	0.0705214	0.0636431	0.0596655	0.0713383
0.17	0.0725079	0.0664912	0.0781975	0.0657076	0.052433	0.0693368	0.0640244	0.0589182	0.0707057
0.18	0.0729434	0.0650764	0.0760337	0.0645269	0.0512519	0.0681486	0.0642657	0.0583658	0.069996
0.19	0.073263	0.0636618	0.0737459	0.0629461	0.0500289	0.0669426	0.0643762	0.0576129	0.0689068
0.2	0.0734594	0.0624788	0.071486	0.0618663	0.0487699	0.0656057	0.0643176	0.0569304	0.0678722
0.21	0.0734909	0.0611341	0.0693333	0.0605599	0.0475186	0.064378	0.064137	0.0561536	0.0667473
0.22	0.0734871	0.0598423	0.0673571	0.0593179	0.0463104	0.0631953	0.063975	0.0555072	0.0657077
0.23	0.0733778	0.0586764	0.065345	0.058078	0.0451938	0.061808	0.0637533	0.0547731	0.0646068
0.24	0.073206	0.0575907	0.0632312	0.0569683	0.0441333	0.0605588	0.0634911	0.0539966	0.0636932
0.25	0.0730338	0.0565849	0.0610986	0.0559844	0.043066	0.0593199	0.0631527	0.0532359	0.0625989
0.26	0.0727267	0.0556427	0.0591275	0.0548807	0.0421935	0.0580632	0.0627761	0.0525829	0.0614185
0.27	0.0723654	0.0546341	0.0571282	0.0538913	0.0411786	0.0568826	0.0624905	0.0518646	0.060193
0.28	0.0719114	0.0536324	0.055218	0.0528116	0.0402166	0.0557262	0.0621717	0.0512491	0.0587952
0.29	0.0714207	0.0526584	0.0533548	0.0519506	0.0392435	0.05455	0.0618714	0.0505708	0.0573944
0.3	0.0709228	0.0514444	0.0516354	0.050939	0.0382475	0.0535381	0.0614794	0.0499623	0.0562081
0.31	0.0704243	0.0504028	0.0501766	0.0497077	0.0372182	0.0523919	0.0609736	0.0493506	0.0551095
0.32	0.0698584	0.0494736	0.048635	0.0487701	0.0363803	0.0513395	0.0604897	0.0488007	0.0538977
0.33	0.0693009	0.0484924	0.0471837	0.0477094	0.035646	0.0503433	0.059964	0.0482552	0.0526989
0.34	0.0687789	0.0475851	0.0458592	0.0468031	0.0348126	0.0494285	0.0594706	0.0478217	0.0515621
0.35	0.0682837	0.0467897	0.0446811	0.0458148	0.0339851	0.0485317	0.0589574	0.0473175	0.0502318
0.36	0.0677035	0.0460312	0.0436106	0.0448206	0.033135	0.0476391	0.0584639	0.0468562	0.0491908
0.37	0.0671091	0.0453449	0.0426267	0.0440143	0.0324697	0.0467968	0.0579943	0.0463159	0.0479317
0.38	0.0664912	0.0447116	0.0416813	0.0430805	0.0317153	0.046007	0.0574683	0.0457796	0.0468295
0.39	0.065872	0.0441789	0.0408653	0.0422267	0.0310852	0.0452361	0.0569174	0.0453921	0.0456739
0.4	0.0652674	0.0437422	0.0400086	0.0413321	0.0303813	0.0445865	0.0563931	0.0449634	0.0446136
0.41	0.0646112	0.0432645	0.0390831	0.040556	0.0298361	0.0438715	0.0558522	0.0445606	0.0435794
0.42	0.0639939	0.0428591	0.0383191	0.0398744	0.0291709	0.0432305	0.0553634	0.0441744	0.042674
0.43	0.0633415	0.0424931	0.0374281	0.039227	0.0285453	0.042649	0.0548028	0.04385	0.041836
0.44	0.0627053	0.0420726	0.0365705	0.0385365	0.0280242	0.0421261	0.0542945	0.0434495	0.0410079
0.45	0.0620746	0.0417179	0.0357585	0.037686	0.0274433	0.041567	0.0537804	0.0431668	0.0403258
0.46	0.0615015	0.0413899	0.0349335	0.0370127	0.0269546	0.0410183	0.053264	0.0427627	0.0396414
0.47	0.060914	0.0409455	0.0343501	0.0363859	0.026433	0.0404155	0.0527345	0.0423751	0.0388802
0.48	0.0602978	0.0406303	0.033813	0.0358238	0.0259721	0.0398476	0.0521988	0.0419791	0.0381193
0.49	0.0596771	0.0401902	0.0331121	0.0353202	0.0255463	0.0393749	0.0516371	0.0416281	0.0373948
0.5	0.0590995	0.039637	0.032399	0.0348145	0.0250583	0.0389716	0.0510443	0.0413128	0.0366845
0.51	0.0584992	0.0392182	0.0318612	0.0342738	0.0245705	0.0386105	0.0505087	0.0409153	0.0361194
0.52	0.0579032	0.0387566	0.0313013	0.0338322	0.0241753	0.0382976	0.0499882	0.0405512	0.0355678
0.53	0.057329	0.0383199	0.0308998	0.0334122	0.0237866	0.037917	0.0494462	0.0401627	0.0350707
0.54	0.056708	0.0378269	0.0305244	0.032967	0.0234934	0.0376045	0.0488993	0.0398389	0.0346132
0.55	0.0561264	0.0374099	0.0299266	0.032559	0.0233716	0.0372714	0.0483561	0.0395907	0.0340815
0.56	0.0556098	0.0370102	0.0294112	0.0321802	0.0230987	0.036837	0.0479031	0.0392497	0.0335612
0.57	0.0549999	0.0367098	0.028703	0.0318284	0.0229526	0.0364979	0.0474237	0.0389169	0.0332105
0.58	0.0544375	0.0362965	0.0281719	0.0314411	0.0227974	0.0362161	0.0469338	0.0386757	0.0326684
0.59	0.0538944	0.0357962	0.0275802	0.0310801	0.0226122	0.0359408	0.046474	0.0384661	0.0321126
0.6	0.0533846	0.0353942	0.0269436	0.0307477	0.0223935	0.0356705	0.0459928	0.0381706	0.0316609
0.61	0.0528415	0.0348647	0.0265444	0.0304416	0.0222732	0.0354711	0.0455412	0.0379238	0.0312782
0.62	0.0523047	0.0343437	0.0261501	0.0301825	0.0221289	0.0352061	0.0451038	0.037746	0.0308006
0.63	0.0517907	0.0338152	0.02578	0.029762	0.0218707	0.0350262	0.044615	0.0374694	0.0302798
0.64	0.0512515	0.033398	0.0254297	0.0294327	0.021711	0.0347221	0.0441456	0.0372516	0.0297801
0.65	0.0506608	0.0329303	0.0249558	0.0290522	0.0214569	0.0344872	0.0436492	0.0370083	0.0294975
0.66	0.0500672	0.0326951	0.0246542	0.0287878	0.0212737	0.0341511	0.0431459	0.0367925	0.02916
0.67	0.049458	0.0324182	0.0244296	0.0285845	0.0210207	0.0339363	0.0426922	0.036599	0.0287792
0.68	0.0488698	0.0321218	0.024119	0.0283898	0.0207734	0.0337002	0.0422834	0.0364053	0.0284031
0.69	0.0482969	0.0318948	0.0237925	0.0282408	0.0204407	0.0334597	0.0418452	0.036192	0.0280758
0.7	0.0477116	0.0315019	0.0235387	0.0280719	0.0201544	0.0331538	0.0413718	0.0359371	0.0276816
0.71	0.0471648	0.0311124	0.0231627	0.0279665	0.0199926	0.0329107	0.0408882	0.0356713	0.0273199
0.72	0.046592	0.0307248	0.0228097	0.0278824	0.019733	0.0327012	0.0404555	0.0354723	0.0269036
0.73	0.0459649	0.0303478	0.0225762	0.0277645	0.0194879	0.0323438	0.0400005	0.0352119	0.0266671
0.74	0.0453596	0.0298816	0.0224495	0.0276601	0.0193487	0.0320329	0.0395561	0.0348662	0.0263455
0.75	0.0447834	0.0294129	0.0220735	0.0275182	0.019159	0.0318781	0.0391864	0.0346384	0.0260218
0.76	0.0441723	0.0290801	0.0217728	0.0273712	0.0190186	0.03157	0.0388155	0.0343901	0.0256478
0.77	0.0435517	0.0287561	0.0215682	0.0271549	0.018798	0.0313917	0.0384924	0.034125	0.0253203
0.78	0.0429461	0.028371	0.0212668	0.0270251	0.0185903	0.031167	0.0381563	0.0337778	0.0249403
0.79	0.04236	0.0279981	0.021066	0.0268464	0.0184706	0.0309044	0.0378323	0.0334429	0.0246324
0.8	0.0417422	0.0276819	0.0207878	0.0266308	0.0183639	0.0306952	0.0375229	0.033164	0.0243902
0.81	0.0411336	0.0273927	0.02053	0.0264366	0.0181611	0.0305473	0.0372331	0.0328479	0.0241342
0.82	0.0405389	0.0270909	0.0201701	0.0261943	0.0180433	0.030445	0.0369514	0.0325491	0.0239326
0.83	0.039935	0.026708	0.0198747	0.0260264	0.0178063	0.0302847	0.036751	0.0322932	0.0236895
0.84	0.039305	0.0263967	0.0195984	0.0258302	0.0175697	0.0301741	0.0366494	0.0319572	0.0234935
0.85	0.0386855	0.0261268	0.0191868	0.0255669	0.0174246	0.029999	0.036518	0.0316156	0.0231535
0.86	0.0381078	0.0258108	0.0189655	0.0254318	0.0172655	0.0298601	0.036357	0.0312999	0.0229279
0.87	0.0374915	0.0254804	0.0187593	0.0251819	0.0171109	0.0296719	0.036165	0.0310573	0.0225597
0.88	0.0368922	0.0252281	0.0184693	0.0248193	0.0169168	0.0294471	0.035932	0.0306971	0.0222964
0.89	0.0362797	0.0249242	0.0181449	0.0245198	0.0167864	0.0292192	0.0356619	0.0303932	0.0220349
0.9	0.0356562	0.0246989	0.017799	0.0241058	0.016659	0.0290274	0.0353268	0.0300992	0.0217696
0.91	0.0350032	0.0244126	0.0175182	0.0237078	0.0165439	0.0288135	0.0350077	0.0297823	0.0213563
0.92	0.0343607	0.0240864	0.0171899	0.023375	0.0164025	0.0285126	0.0346619	0.0295207	0.0209889
0.93	0.0337178	0.0238304	0.0167721	0.0230341	0.0161793	0.0281402	0.0343614	0.0292583	0.0207354
0.94	0.033078	0.0236149	0.0163277	0.0226834	0.0160478	0.027886	0.034095	0.0290104	0.0204239
0.95	0.0323985	0.0233363	0.0160476	0.0223903	0.0158878	0.0275663	0.0337873	0.0287316	0.0201103
0.96	0.0317328	0.0230412	0.0157521	0.0220262	0.0157168	0.0273317	0.033401	0.0283758	0.019835
0.97	0.0310186	0.0226745	0.0154031	0.0217064	0.0155891	0.0270205	0.0330151	0.0280829	0.0195016
0.98	0.030315	0.0223933	0.0150314	0.0214512	0.0154707	0.0267057	0.0326836	0.0277654	0.0192647
0.99	0.029621	0.0220947	0.0146668	0.0210625	0.015307	0.0264483	0.0323503	0.0275071	0.019026
