# Supplementary figures and images for: Bilateral regulation of EGFR activity and local PI(4,5)P2 dynamics in mammalian cells observed with superresolution microscopy
Source: eLife journal article supplement (doi:10.7554/elife.101652), 2024-10-09

A

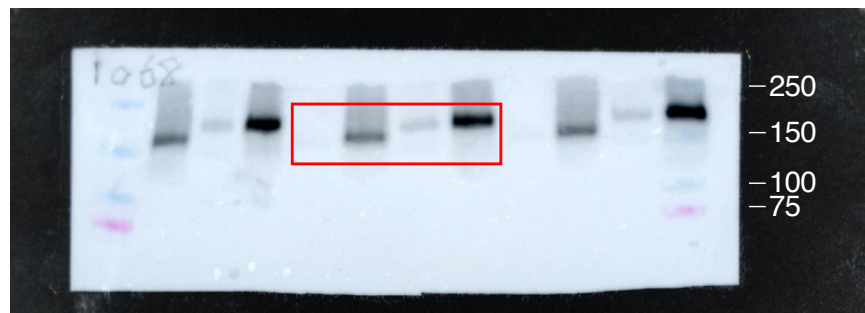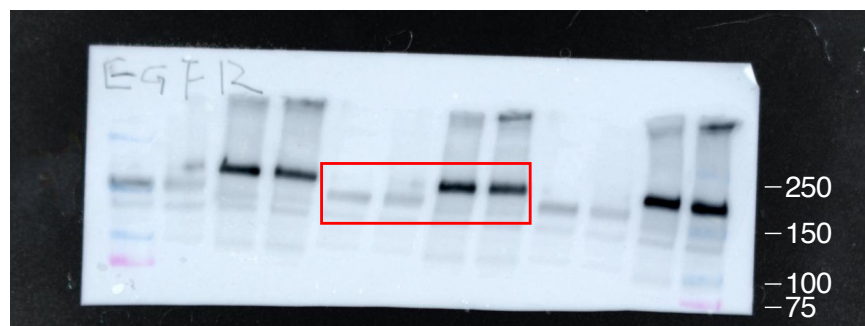

B

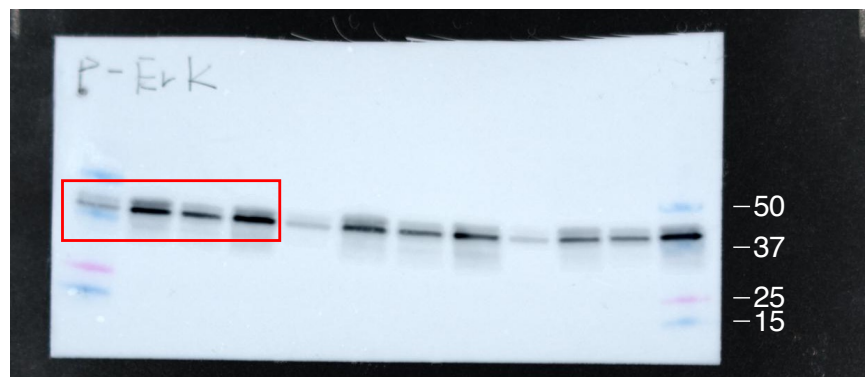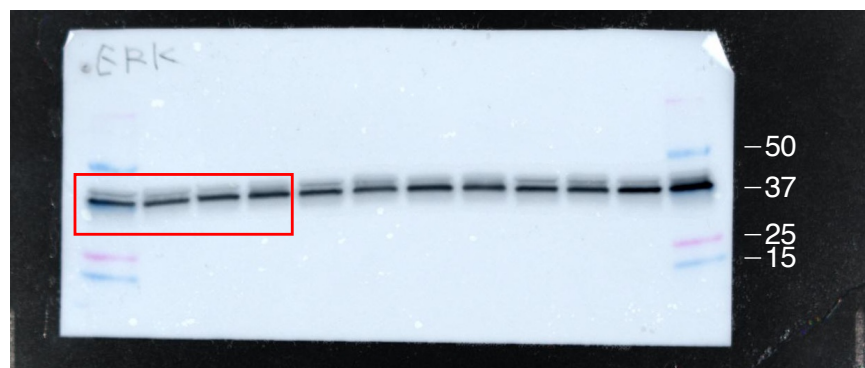

Supplement: fig1-figsupp2-data1 [file elife-101652-fig1-figsupp2-data1-v1.zip]

A

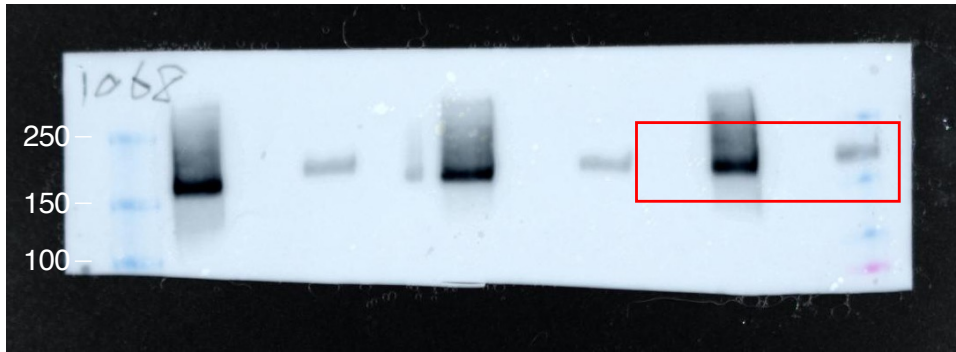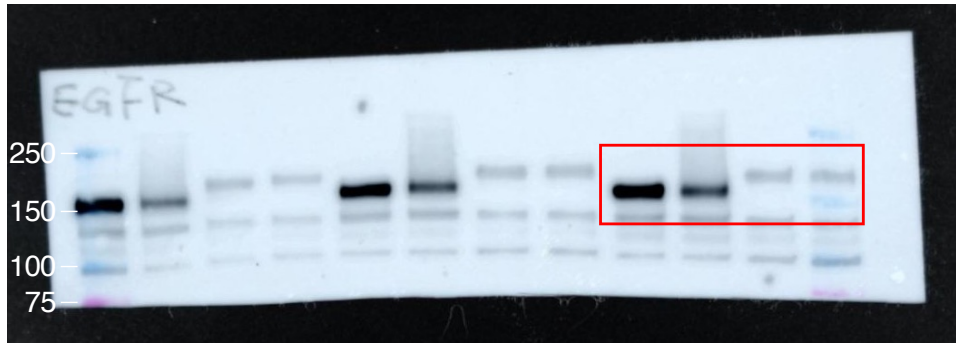

Supplement: fig3-figsupp1-data1 [file elife-101652-fig3-figsupp1-data1-v1.zip]

A

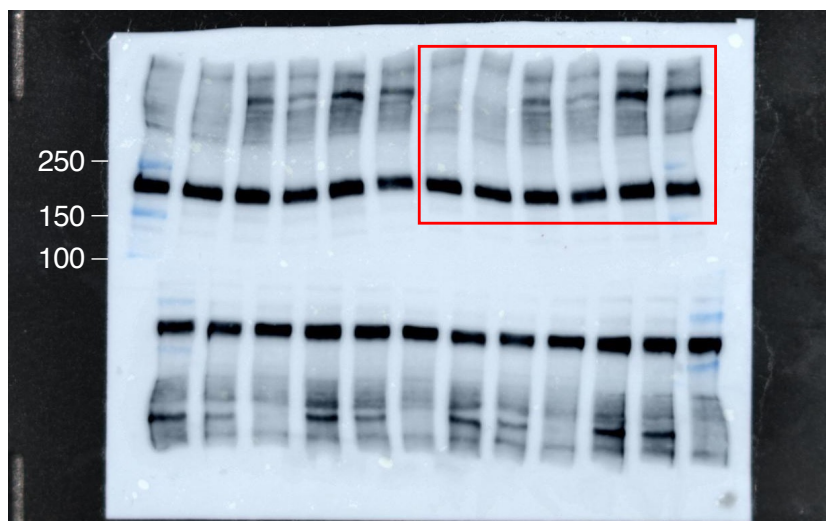

C

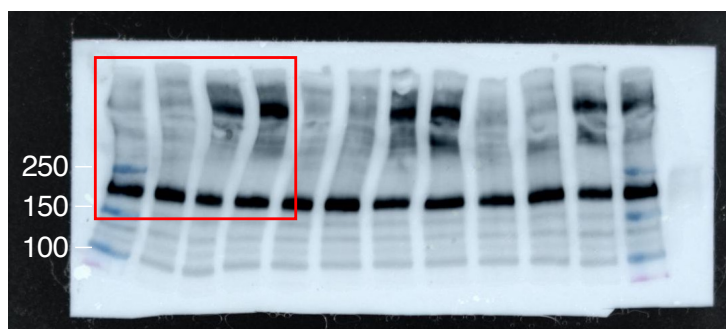

E

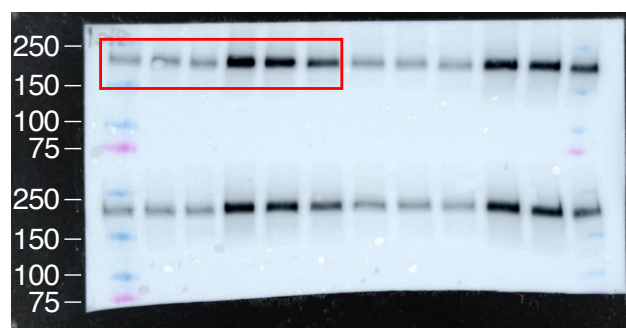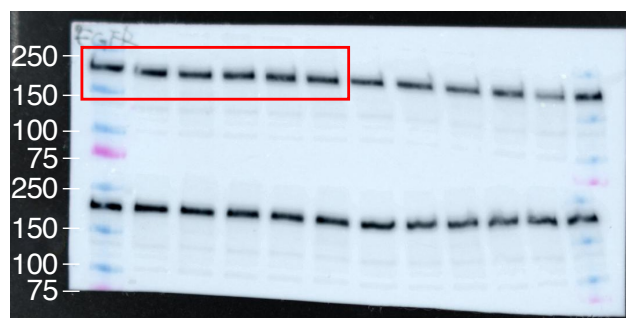

Supplement: fig5-data1 [file elife-101652-fig5-data1-v1.zip]

C

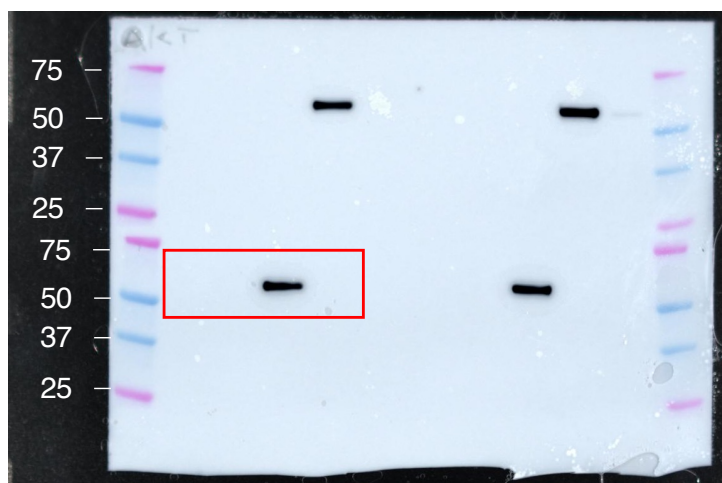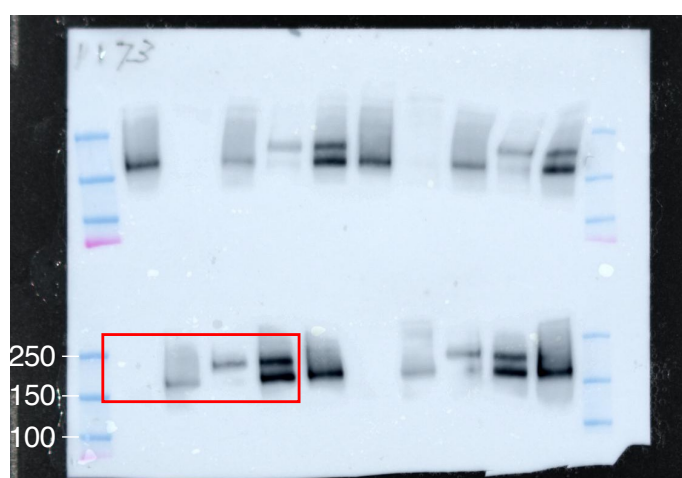

Supplement: fig6-figsupp1-data2 [file Figure 6-figure supplement 1-source data 2.pdf › Figure 6-figure supplement 1-source data 2.pdf]

A

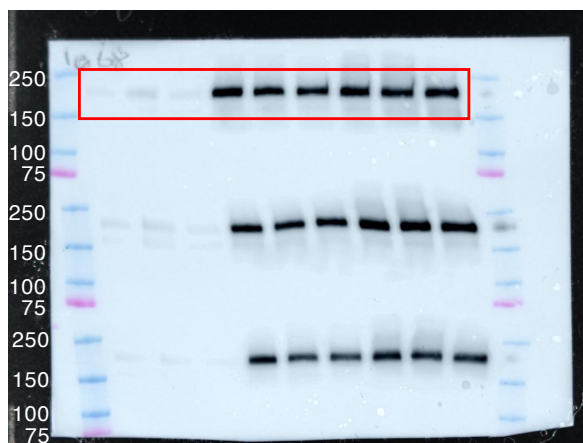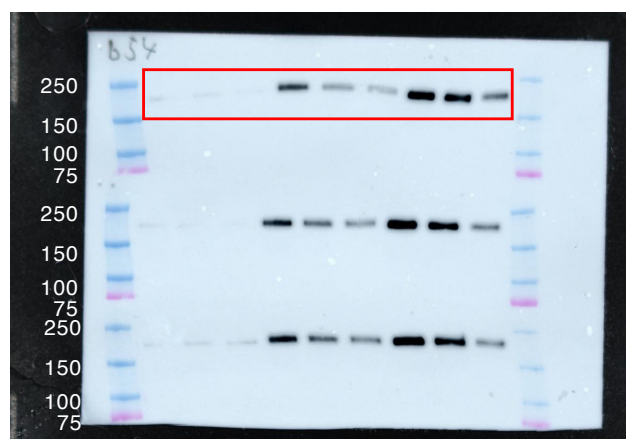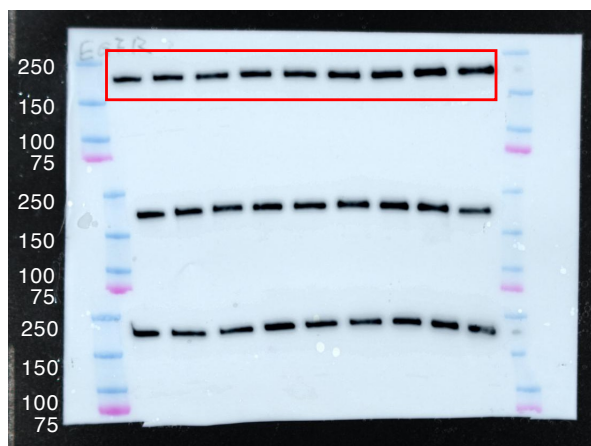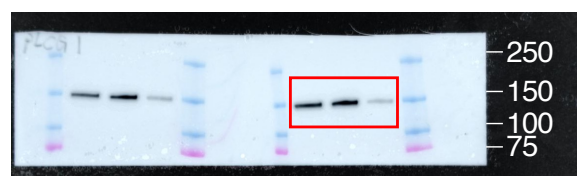

C

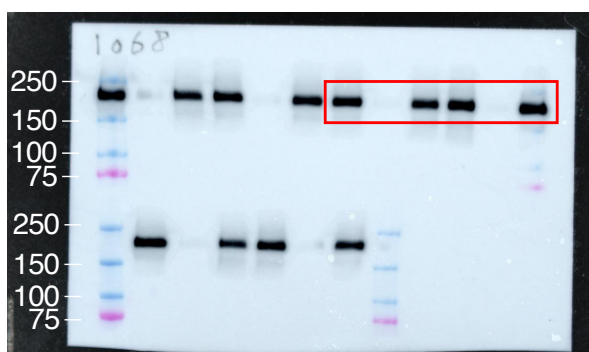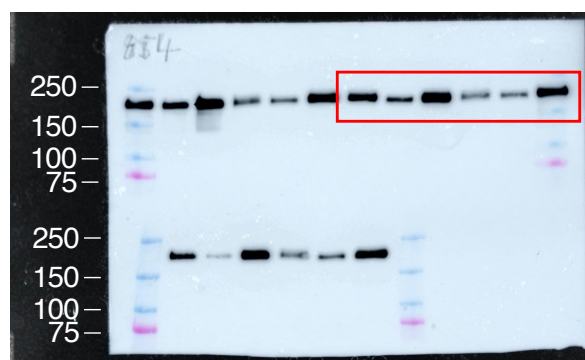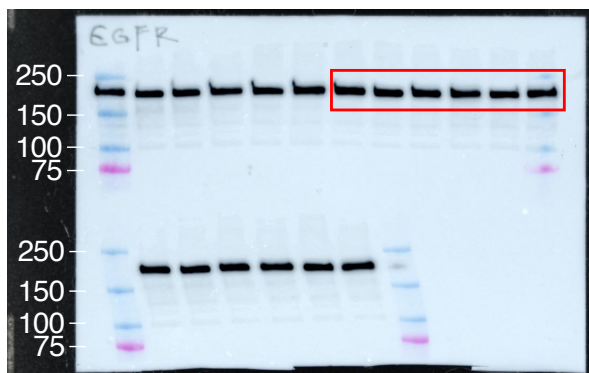

Supplement: fig7-data1 [file elife-101652-fig7-data1-v1.zip]
